# Supplementary material for: Effects of implementation strategies on nursing practice and patient outcomes: a comprehensive systematic review and meta-analysis
Source: PubMed Central journal article supplement — Implement Sci. 2024 Sep 30;19:68. doi: 10.1186/s13012-024-01398-0 (PMC11443951; doi:10.1186/s13012-024-01398-0), 2024-09-30

Additional file 9. Funnel plots.

Outcome 1: Clinical Practice (Continuous)

1. Any implementation strategy vs no active intervention

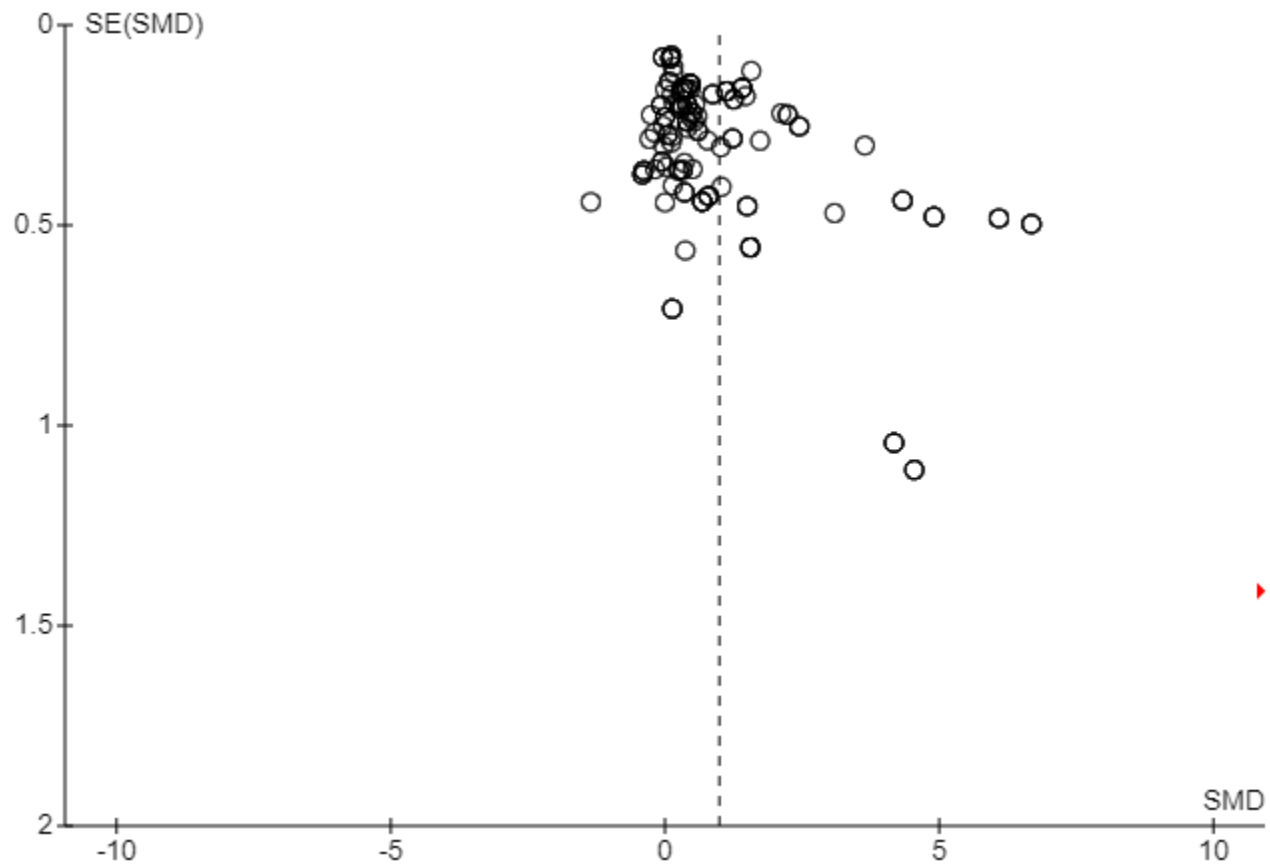

Additional file 9. Funnel plots.

2. Multifaceted implementation strategy vs single component strategy

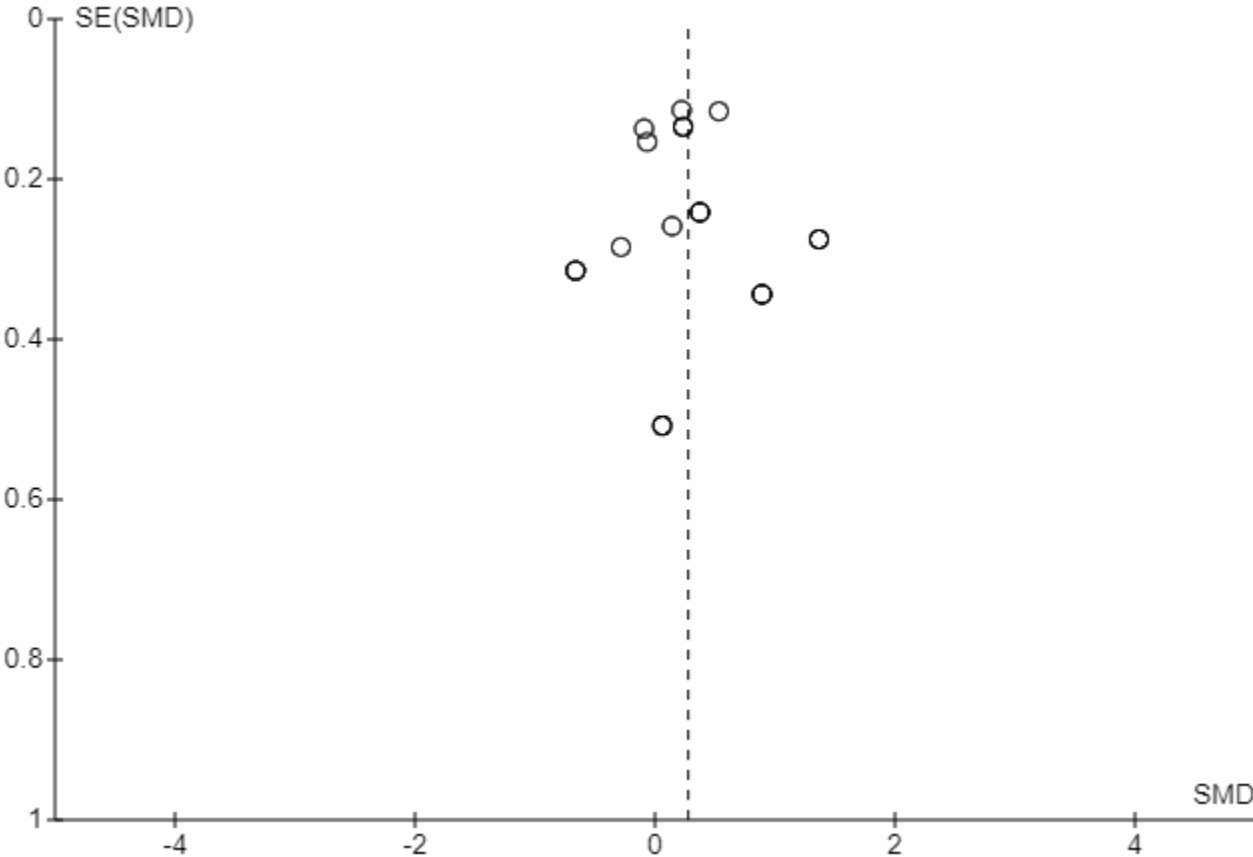

Additional file 9. Funnel plots.

3. Strategies including individual clinician education vs no individual clinician education

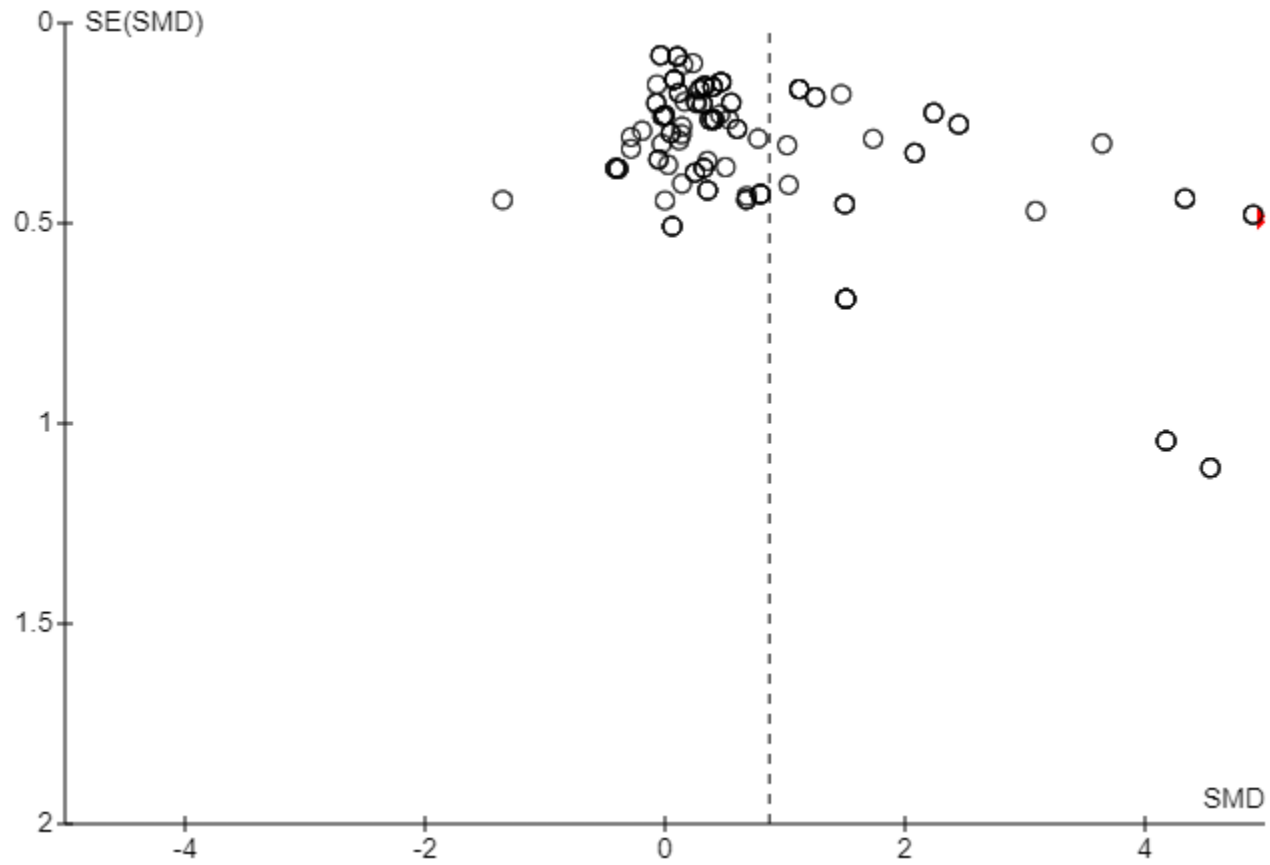

Additional file 9. Funnel plots.

4. Strategies including group clinician education vs no group clinician education

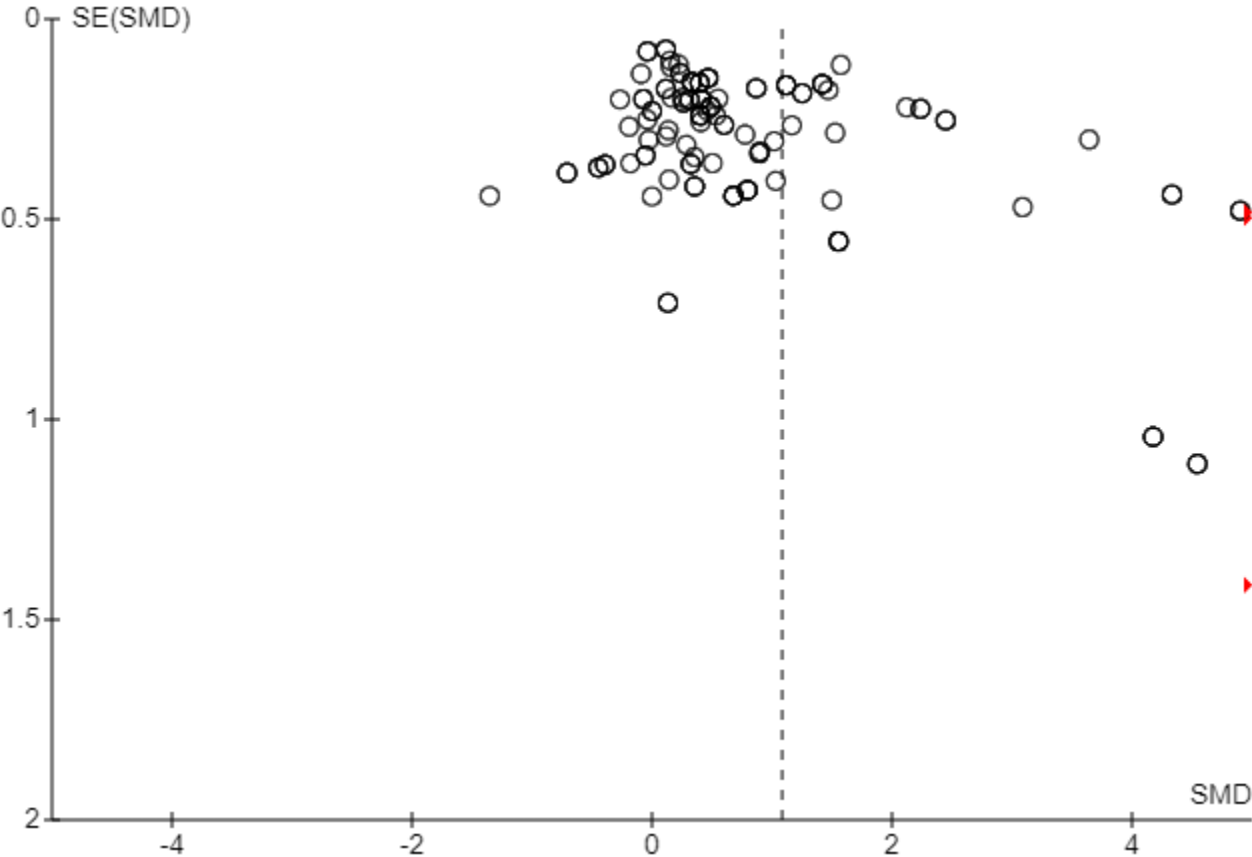

Additional file 9. Funnel plots.

5. Strategies including reminders vs no reminders

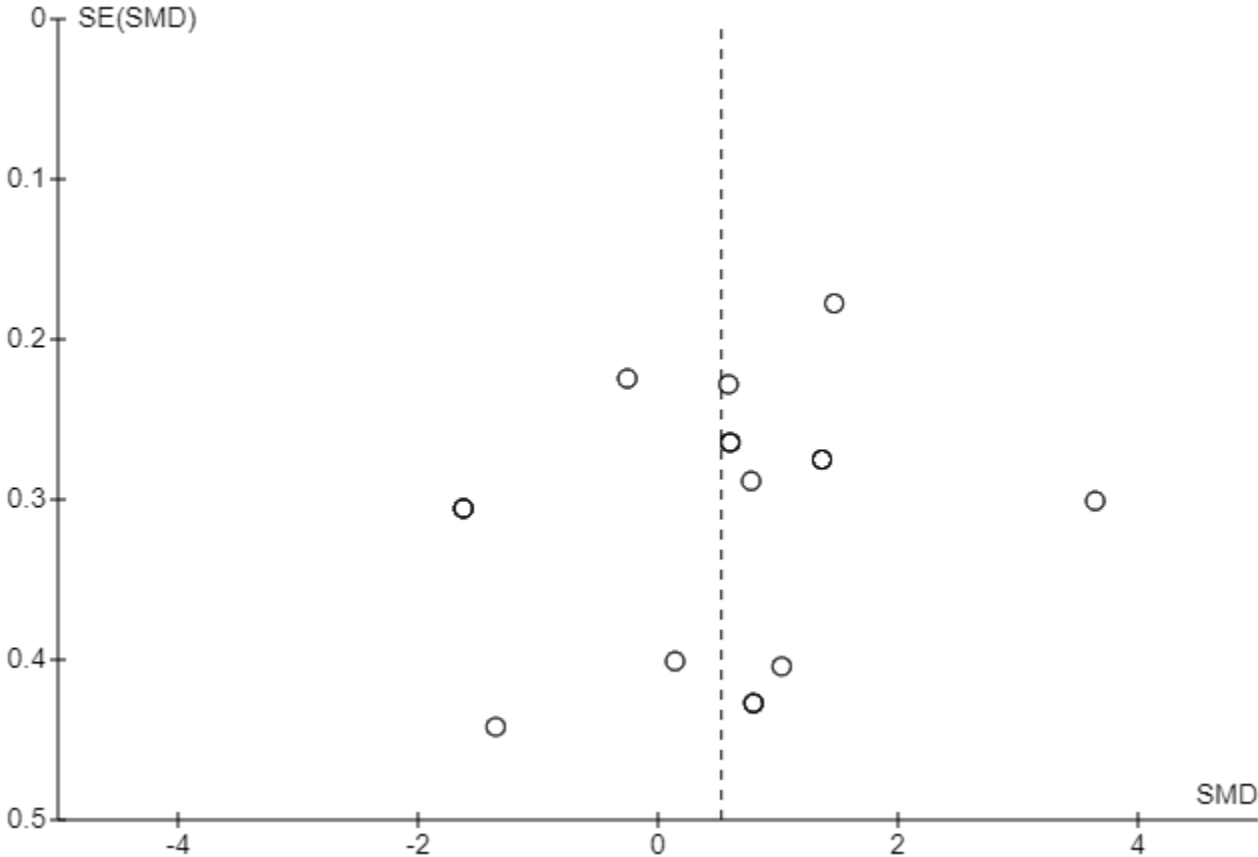

Additional file 9. Funnel plots.

6. Strategies including audit and feedback vs no audit and feedback

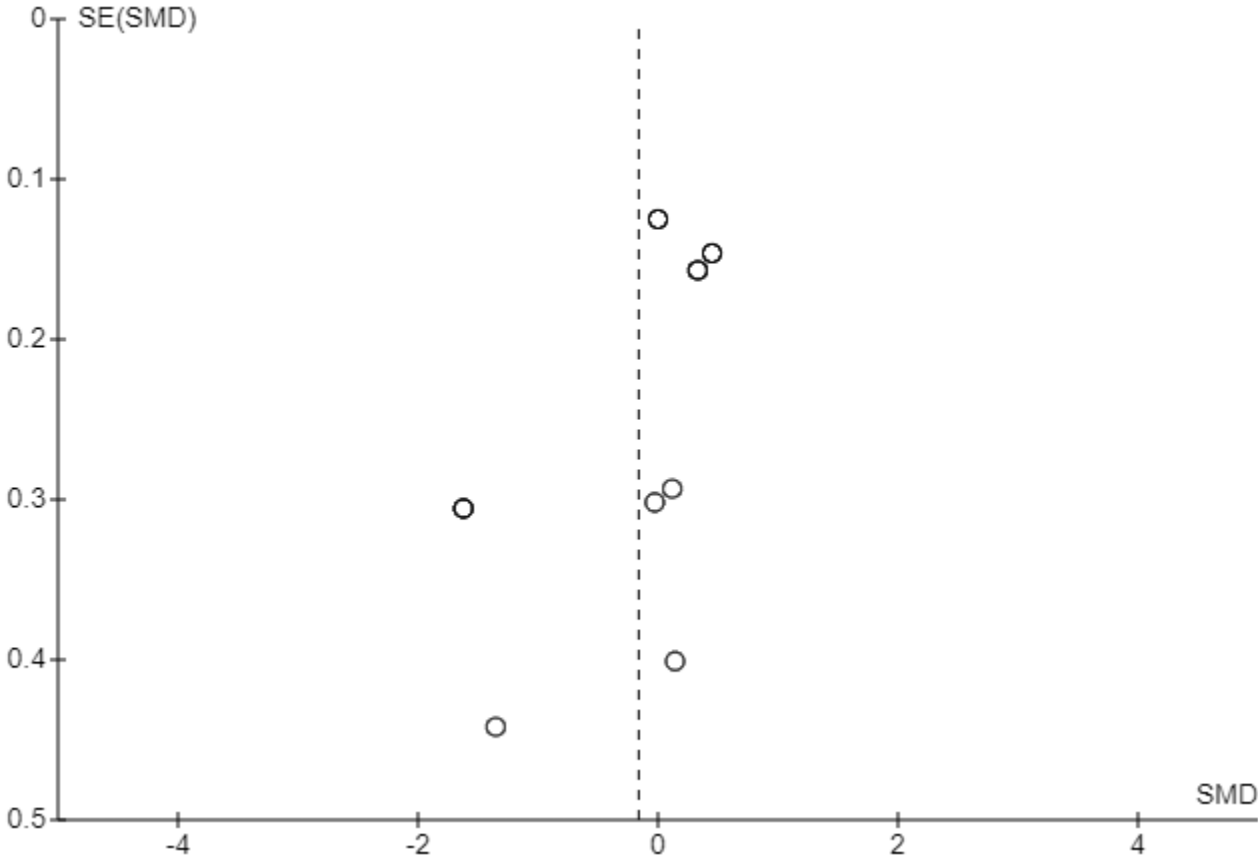

Additional file 9. Funnel plots.

7. Strategies including a tailored intervention vs no tailored intervention

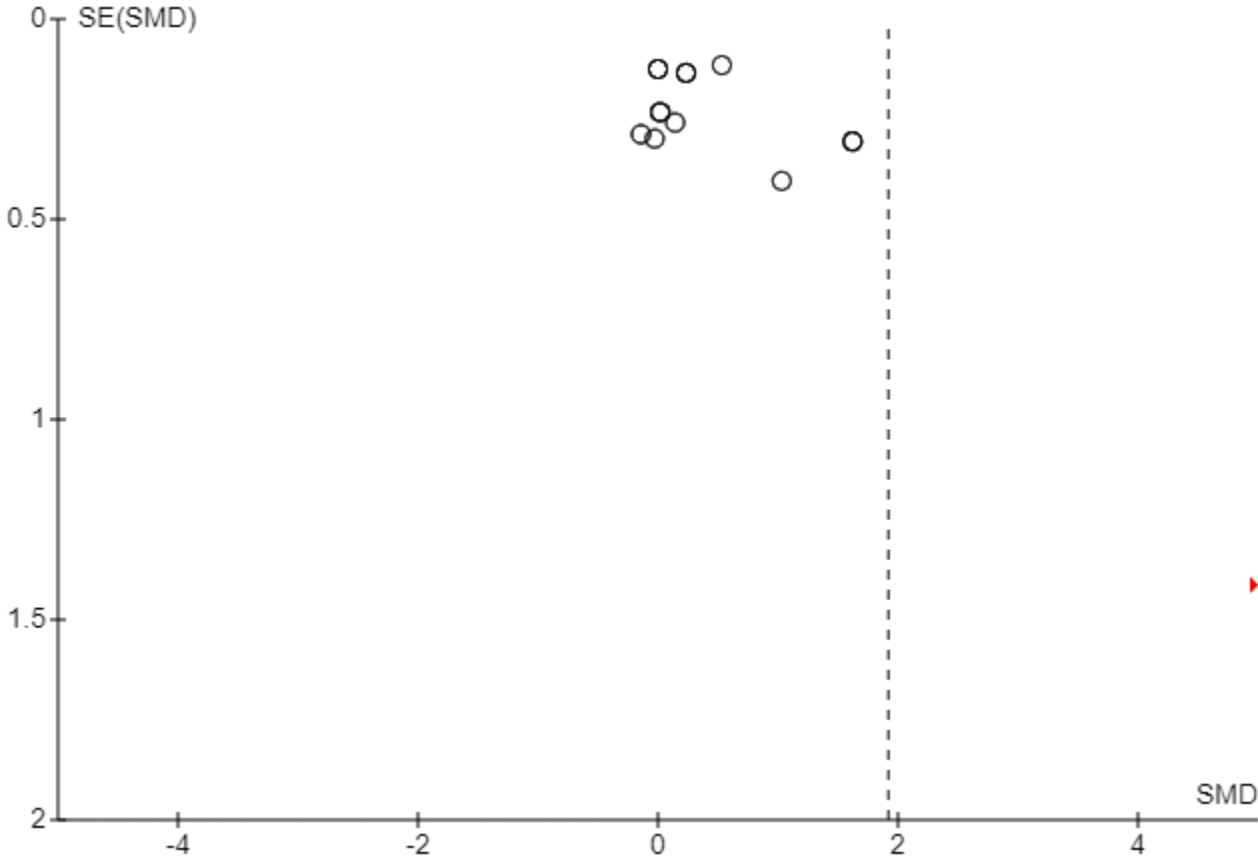

Additional file 9. Funnel plots.

8. Strategies including opinion leaders vs no opinion leaders

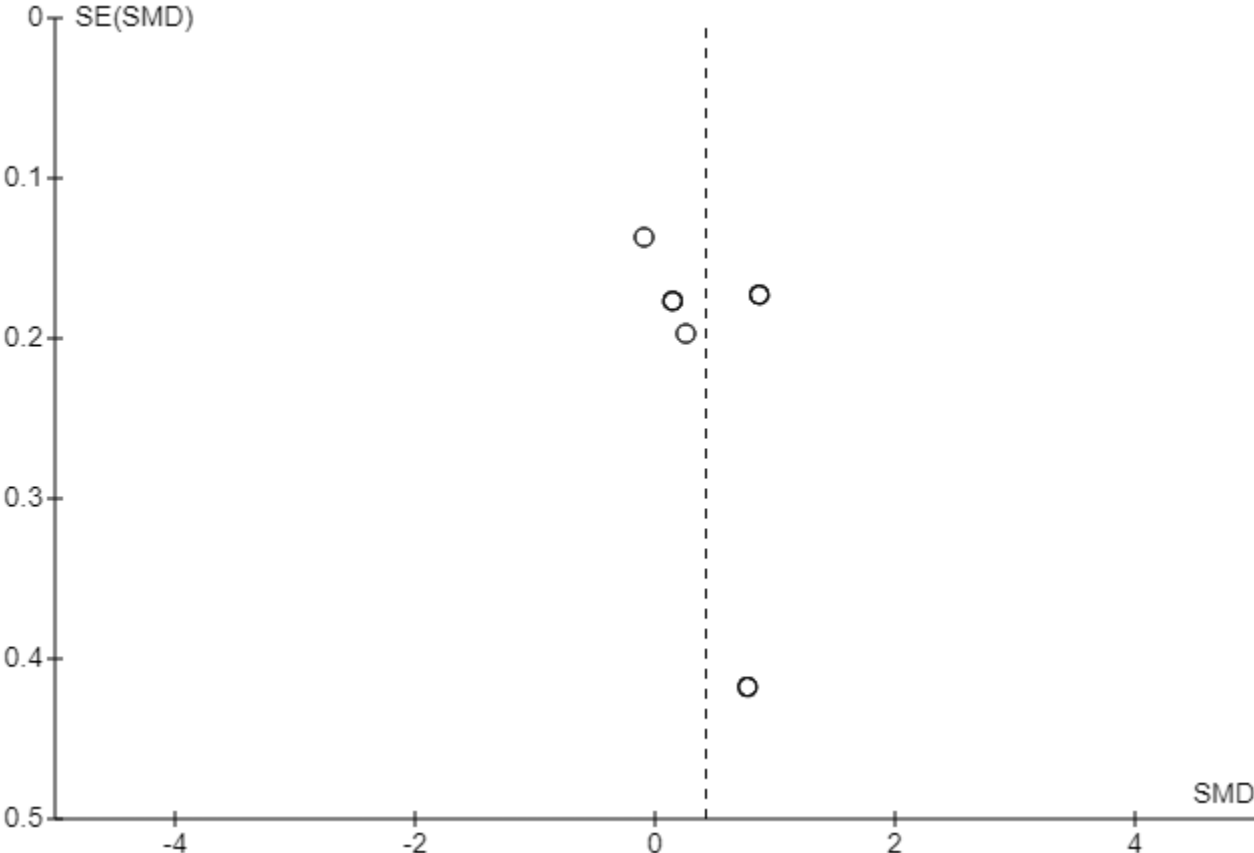

9.



Additional file 9. Funnel plots.

Outcome #2: Clinical Practice (Dichotomous)

1. Any implementation strategy vs no intervention

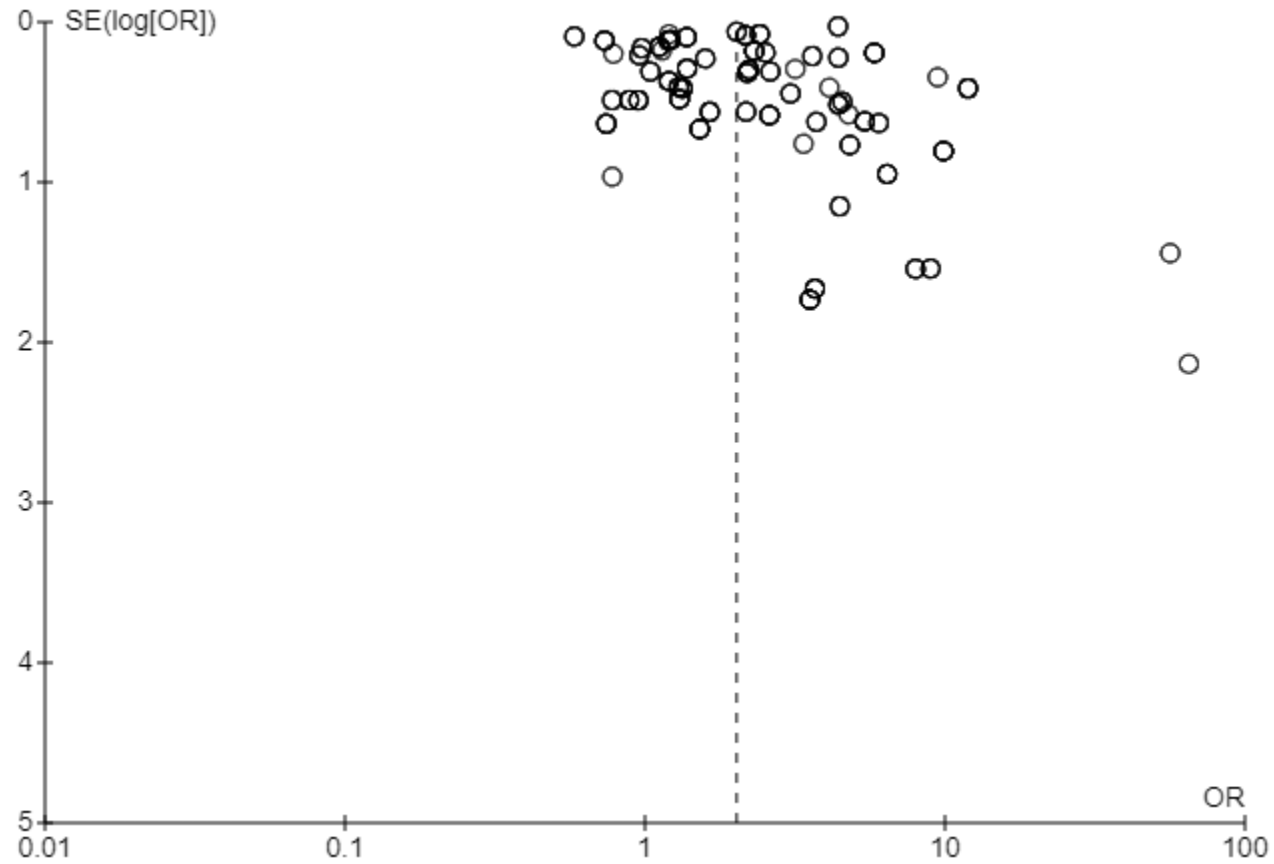

Additional file 9. Funnel plots.

2. Multifaceted implementation strategy vs single component strategy

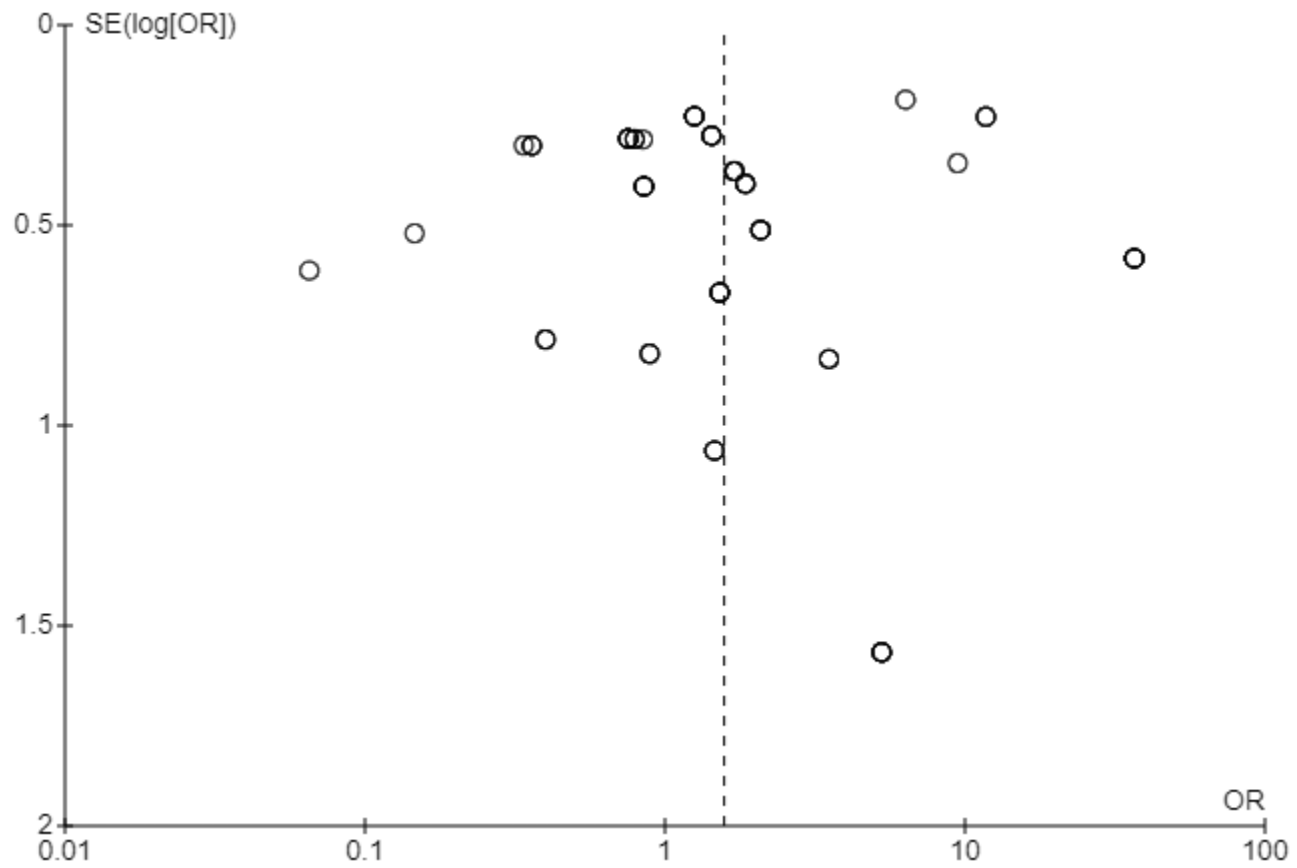

Additional file 9. Funnel plots.

3. Strategies including individual clinician education vs no individual clinician education

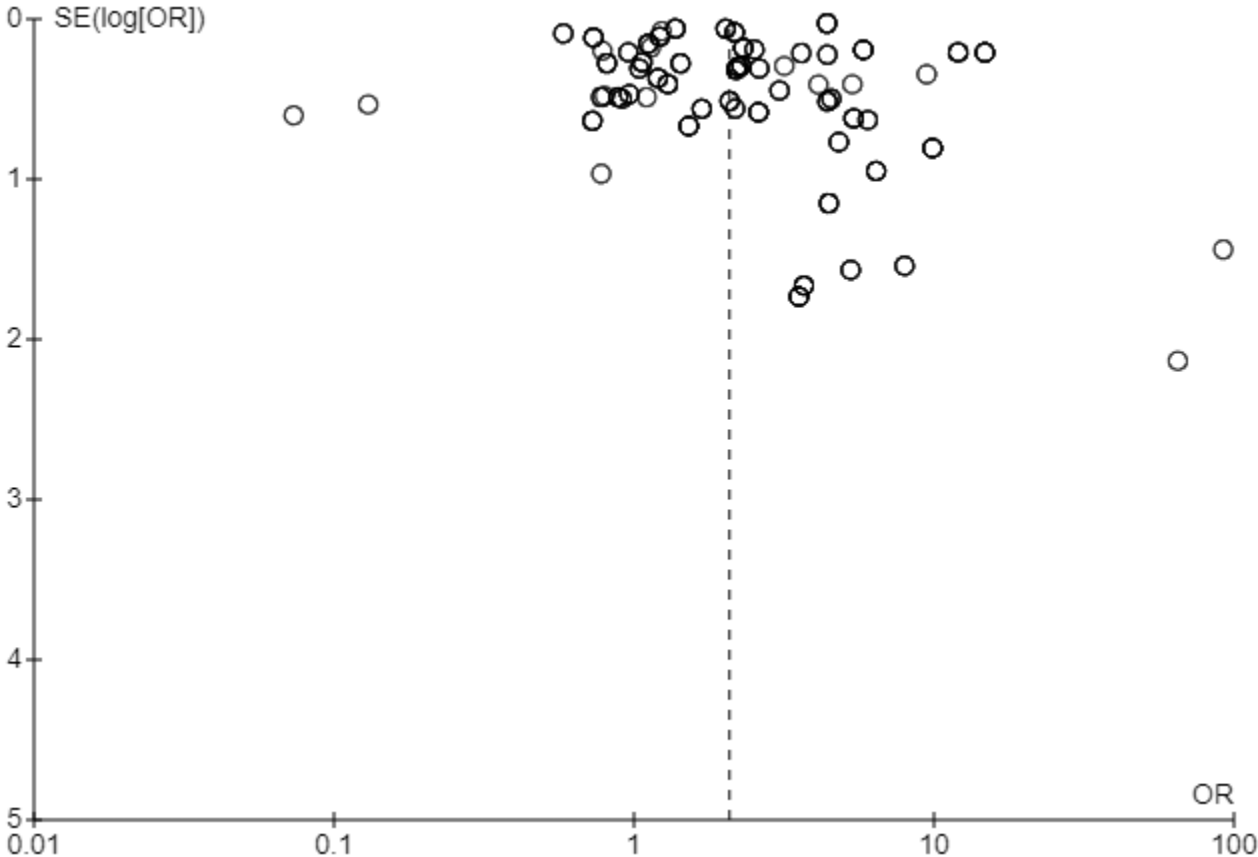

Additional file 9. Funnel plots.

4. Strategies including group clinical education vs no group clinician education

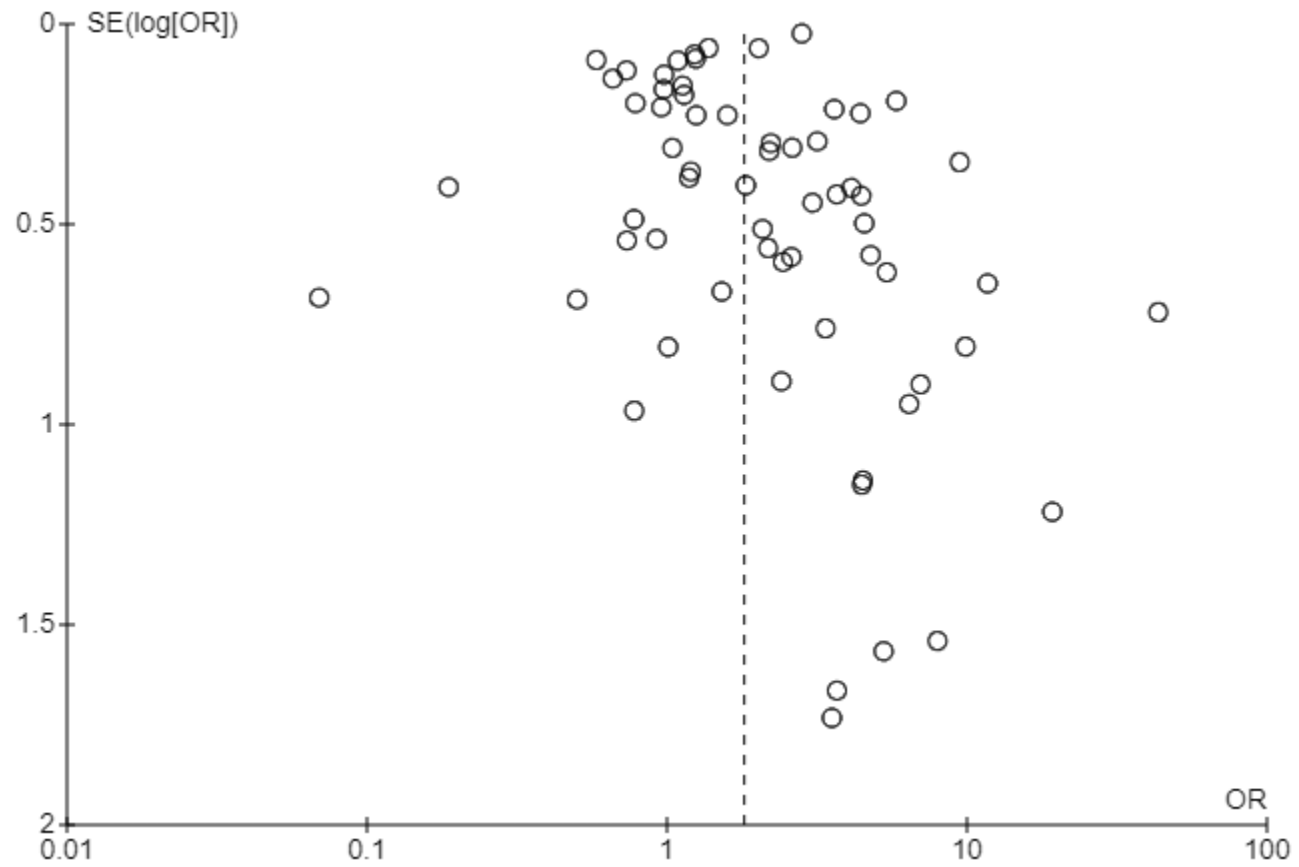

Additional file 9. Funnel plots.

5. Strategies including reminders vs no reminders

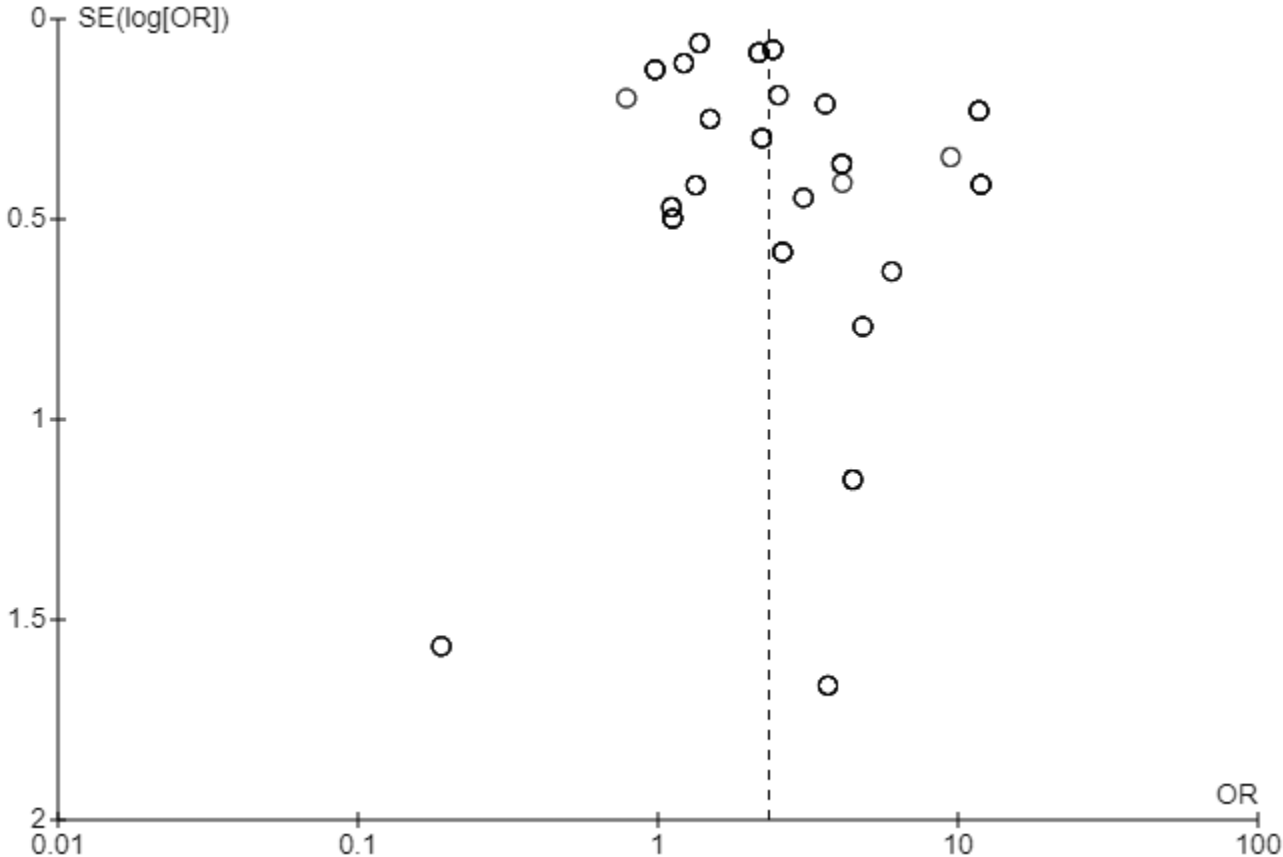

Additional file 9. Funnel plots.

6. Strategies including a patient-mediated intervention vs no patient-mediated intervention

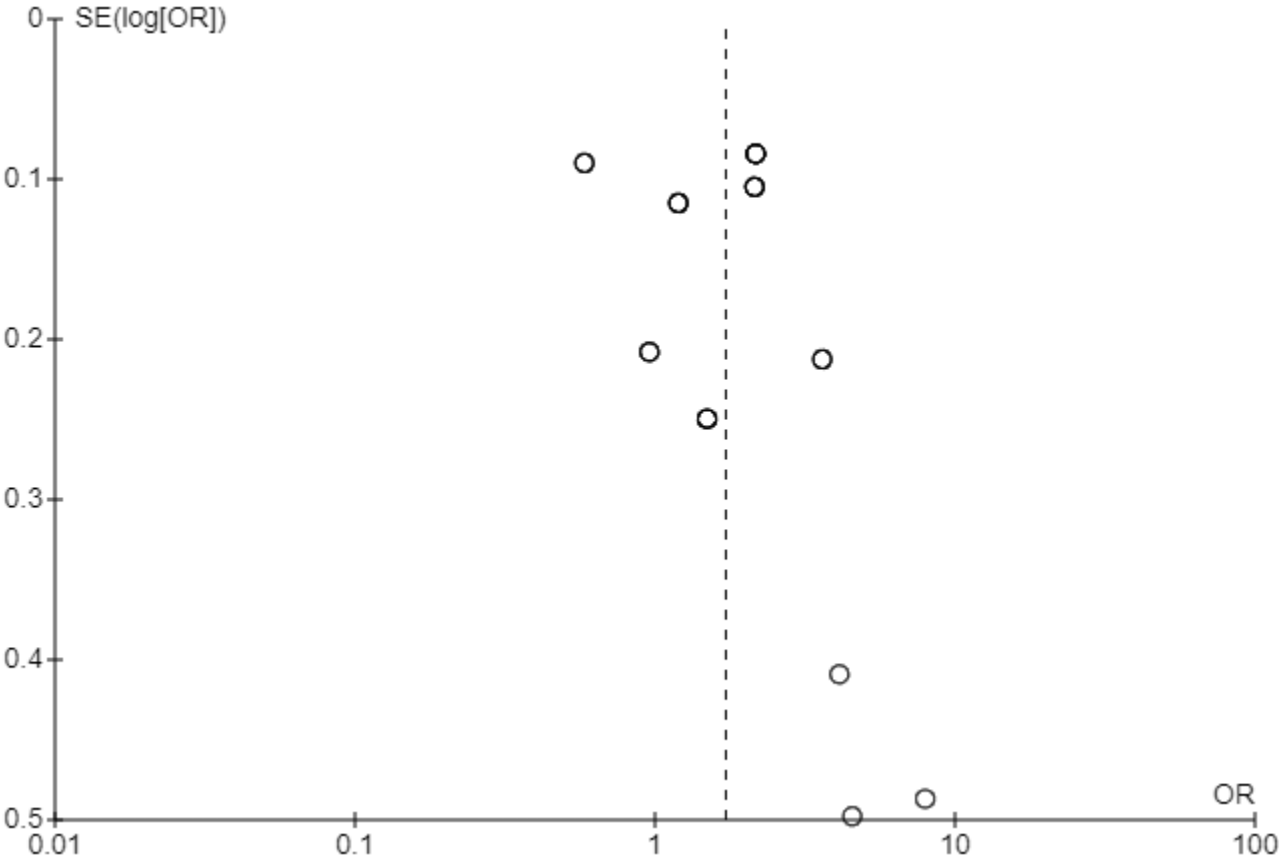

Additional file 9. Funnel plots.

7. Strategies including audit and feedback vs no audit and feedback

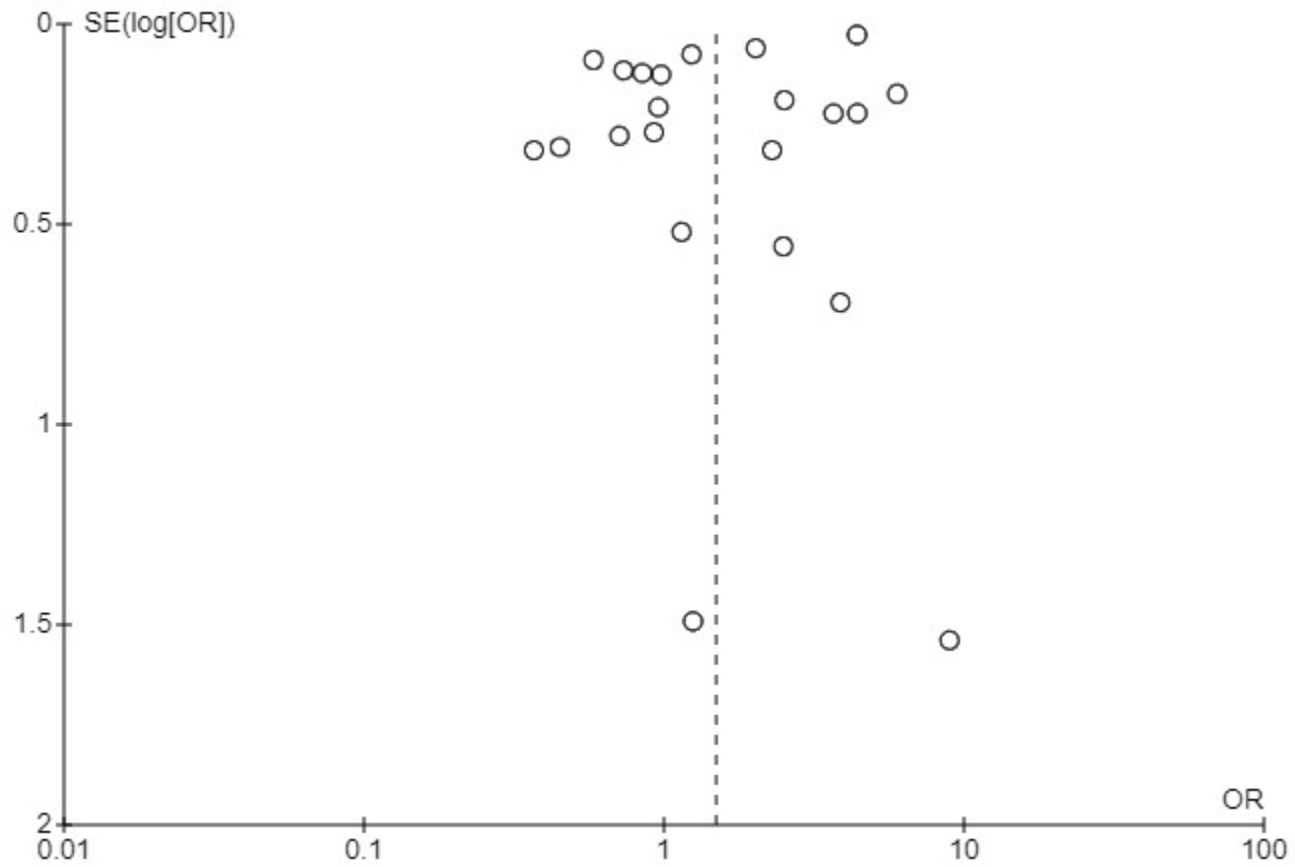

Additional file 9. Funnel plots.

8. Strategies including a tailored intervention vs no tailored intervention

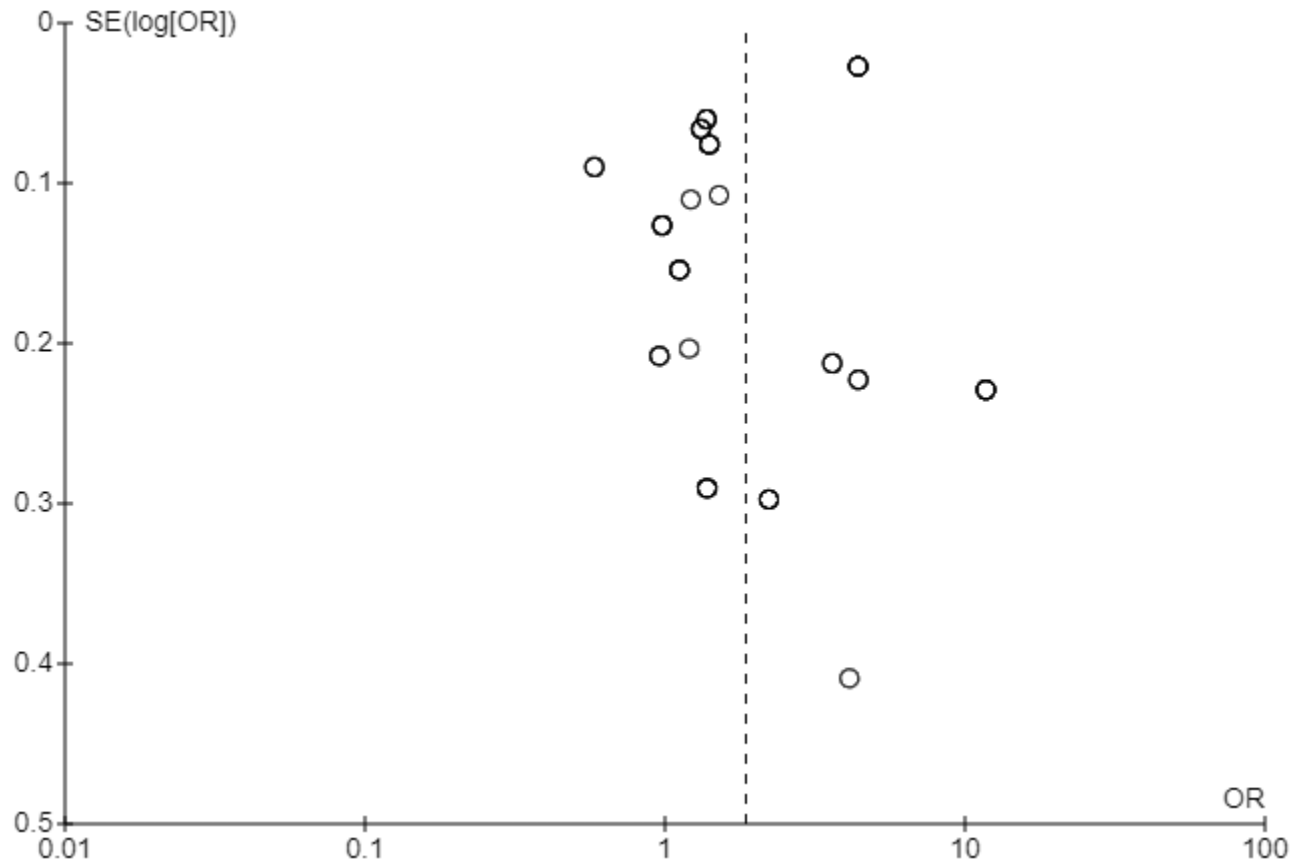



Additional file 9. Funnel plots.

9. Strategies including opinion leaders vs no opinion leaders

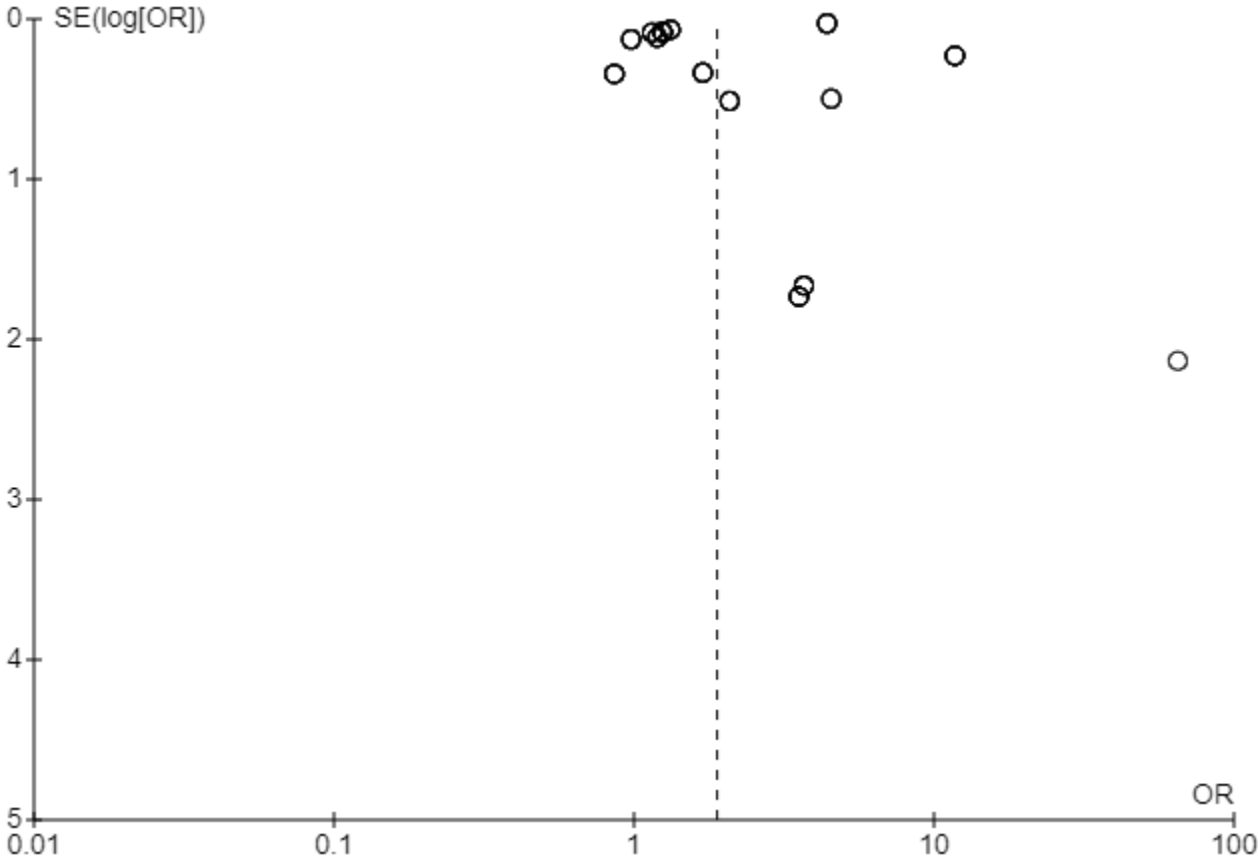

Supplement: 13012_2024_1398_MOESM9_ESM.pdf [file 13012_2024_1398_MOESM9_ESM.pdf]
