# Supplementary material for: Effects of implementation strategies on nursing practice and patient outcomes: a comprehensive systematic review and meta-analysis
Source: PubMed Central journal article supplement — Implement Sci. 2024 Sep 30;19:68. doi: 10.1186/s13012-024-01398-0 (PMC11443951; doi:10.1186/s13012-024-01398-0), 2024-09-30
Supplement: 13012_2024_1398_MOESM2_ESM.pdf [file 13012_2024_1398_MOESM2_ESM.pdf]

## Additional file 2. Search strategies by database.

| <b>1. PubMed</b> |                                                                                                                                                                                                                                                                                                                                                                                                                                                                                                                                                                                                                                                                                                                                                                                                                                                                                                                                                                                                                                                                                                                                                                                                                                                                                                                                                                                                                                                                                                                                                                                       |
|------------------|---------------------------------------------------------------------------------------------------------------------------------------------------------------------------------------------------------------------------------------------------------------------------------------------------------------------------------------------------------------------------------------------------------------------------------------------------------------------------------------------------------------------------------------------------------------------------------------------------------------------------------------------------------------------------------------------------------------------------------------------------------------------------------------------------------------------------------------------------------------------------------------------------------------------------------------------------------------------------------------------------------------------------------------------------------------------------------------------------------------------------------------------------------------------------------------------------------------------------------------------------------------------------------------------------------------------------------------------------------------------------------------------------------------------------------------------------------------------------------------------------------------------------------------------------------------------------------------|
| #1               | (Translational Medical Research[MH] OR Knowledge Management[MH] OR Knowledge[MH] OR Implementation Science[MH] OR Information Dissemination[MH] OR Clinical audit[MH] OR Feedback[MH] OR Reminder Systems[MH] OR Health plan Implementation[MH] OR Practice Guideline[MH] OR education[MH] OR learning[MH]) OR ("Knowledge transfer"[TIAB] OR "Knowledge transfers"[TIAB] OR "knowledge translations"[TIAB] OR "Knowledge Translation"[TIAB] OR "Knowledge mobilisation"[TIAB] OR "Knowledge mobilisations"[TIAB] OR "Knowledge mobilization"[TIAB] OR "Knowledge mobilizations"[TIAB] OR "knowledge uptake"[TIAB] OR "knowledge uptakes"[TIAB] OR "Knowledge management"[TIAB] OR "Knowledge dissemination"[TIAB] OR "Knowledge exchange "[TIAB] OR "Translation Research"[TIAB] OR "Translation Researches" OR "Translational Research"[TIAB] OR "Translational Researches"[TIAB] OR Audit[TIAB] OR Audits[TIAB] OR Feedback*[TIAB] OR Reminder*[TIAB] OR Implement*[TIAB] OR "local opinion leader"[TIAB] OR "local opinion leaders"[TIAB] OR "local consensus process"[TIAB] OR "local consensus processes"[TIAB] OR "communities of practice"[TIAB] OR "community of practices"[TIAB] OR "community of practice"[TIAB] OR "managerial supervision"[TIAB] OR "clinical incident reporting"[TIAB] OR "academic detailing"[TIAB] OR "e-learning"[TIAB] OR "elearning"[TIAB] OR "web-based learning"[TIAB] OR "computer-based learning"[TIAB] OR "serious game"[TIAB] OR "serious games"[TIAB] OR education*[TIAB] OR course[TIAB] OR courses[TIAB] OR train*[TIAB] OR learn*[TIAB]) |
| #2               | (Nurses[MH] OR Nurs*[TIAB])                                                                                                                                                                                                                                                                                                                                                                                                                                                                                                                                                                                                                                                                                                                                                                                                                                                                                                                                                                                                                                                                                                                                                                                                                                                                                                                                                                                                                                                                                                                                                           |
| #3               | (eng[LA] AND (clinical study[PT] OR Guideline[PT] OR Evaluation Studies[PT]))                                                                                                                                                                                                                                                                                                                                                                                                                                                                                                                                                                                                                                                                                                                                                                                                                                                                                                                                                                                                                                                                                                                                                                                                                                                                                                                                                                                                                                                                                                         |
| #4               | #1 AND #2 AND #3                                                                                                                                                                                                                                                                                                                                                                                                                                                                                                                                                                                                                                                                                                                                                                                                                                                                                                                                                                                                                                                                                                                                                                                                                                                                                                                                                                                                                                                                                                                                                                      |
| #5               | Students[MH] OR Education, Medical, Undergraduate[MH] OR Qualitative Research [MH] OR Cross-Sectional Studies[MH] OR observational study[PT] OR Systematic Reviews as Topic[MH] OR Observational Studies as Topic[MH] OR Systematic Review[PT] OR Student*[TIAB] OR School*[TIAB] OR undergrad*[TIAB] OR qualitativ*[TIAB] OR Editorial*[TIAB] OR Cross-sectional[TIAB] OR "Cross sectional"[TIAB] OR observational[TIAB] OR "systematic review"[TIAB] OR "systematic reviews"[TIAB]                                                                                                                                                                                                                                                                                                                                                                                                                                                                                                                                                                                                                                                                                                                                                                                                                                                                                                                                                                                                                                                                                                  |
| #6               | #4 NOT #5                                                                                                                                                                                                                                                                                                                                                                                                                                                                                                                                                                                                                                                                                                                                                                                                                                                                                                                                                                                                                                                                                                                                                                                                                                                                                                                                                                                                                                                                                                                                                                             |

**Additional file 2. Search strategies by database.**

| <b>2. Web of Science</b> |                                                                                                                                                                                                                                                                                                                                                                                                                                                                                                                                                                                                                                                                                                                                                                                                                                   |
|--------------------------|-----------------------------------------------------------------------------------------------------------------------------------------------------------------------------------------------------------------------------------------------------------------------------------------------------------------------------------------------------------------------------------------------------------------------------------------------------------------------------------------------------------------------------------------------------------------------------------------------------------------------------------------------------------------------------------------------------------------------------------------------------------------------------------------------------------------------------------|
| 1                        | (TS=(((Knowledge NEAR/1 (transfer* OR translation* OR mobilisation* OR mobilization* OR uptake* OR management OR dissemination* OR exchange*)) OR (Translation* NEAR/1 Research*)) OR Audit OR Audits OR Feedback* OR Reminder* OR Implement* OR "local opinion leader" OR "local opinion leaders" OR "local consensus process" OR "local consensus processes" OR "communities of practice" OR "community of practices" OR "community of practice" OR "managerial supervision" OR "clinical incident reporting" OR "academic detailing" OR "e-learning" OR "elearning" OR "web-based learning" OR "computer-based learning" OR "serious game" OR "serious games" OR course OR courses OR train* OR learn* OR education*) NEAR/10 ("nurse" OR "nurses" OR "nursing staff"))) AND LANGUAGE: (English) AND DOCUMENT TYPES: (Article) |
| 2                        | (ALL=("randomised controlled trial" OR "randomized controlled trial" OR "clinical stud*" OR "clinical trial*" OR "evaluation stud*" OR "guideline*")) AND LANGUAGE: (English) AND DOCUMENT TYPES: (Article)                                                                                                                                                                                                                                                                                                                                                                                                                                                                                                                                                                                                                       |
| 3                        | (ALL=(student* OR Undergrad* OR "Qualitative research" OR " Qualitative researches" OR "Editorial" OR "Observational study" OR "Observational studies" OR "case report" OR "case reports" OR "Review" OR "Reviews" OR "Cross-Sectional Studies" OR "Cross-Sectional study")) AND LANGUAGE: (English) AND DOCUMENT TYPES: (Article)                                                                                                                                                                                                                                                                                                                                                                                                                                                                                                |
| 4                        | (#1 AND #2) AND LANGUAGE: (English) AND DOCUMENT TYPES: (Article)                                                                                                                                                                                                                                                                                                                                                                                                                                                                                                                                                                                                                                                                                                                                                                 |
| 5                        | (#4 NOT #3) AND LANGUAGE: (English) AND DOCUMENT TYPES: (Article)                                                                                                                                                                                                                                                                                                                                                                                                                                                                                                                                                                                                                                                                                                                                                                 |

## Additional file 2. Search strategies by database.

| <b>3. CINAHL</b> |                                                                                                                                                                                                                                                                                                                                                                                                                                                                                                                                                                                                                                                                                                                                                                                                                                                                            |
|------------------|----------------------------------------------------------------------------------------------------------------------------------------------------------------------------------------------------------------------------------------------------------------------------------------------------------------------------------------------------------------------------------------------------------------------------------------------------------------------------------------------------------------------------------------------------------------------------------------------------------------------------------------------------------------------------------------------------------------------------------------------------------------------------------------------------------------------------------------------------------------------------|
| S1               | (MH"Knowledge+" OR MH"Feedback" OR MH"Audit" OR MH"Nursing Audit" OR MH "Reminder Systems" OR MH "Education+" OR MH "Practice Guidelines" OR MH "Learning+" OR ((Knowledge W1 (transfer* OR translation* OR mobilisation* OR mobilization* OR uptake* OR management OR dissemination* OR exchange*)) OR (Translation* W1 Research*)) OR Audit OR Audits OR Feedback* OR Reminder* OR Implement* OR "local opinion leader" OR "local opinion leaders" OR "local consensus process" OR "local consensus processes" OR "communities of practice" OR "community of practices" OR "community of practice" OR "managerial supervision" OR "clinical incident reporting" OR "academic detailing" OR "e-learning" OR "elearning" OR "web-based learning" OR "computer-based learning" OR "serious game" OR "serious games" OR course OR courses OR train* OR learn* OR education*) |
| S2               | (MH "Nursing Manpower+" OR AB"nurse" OR AB"nurses" OR AB"nursing staff" OR TI"nurses" OR TI"nurse" OR TI"nursing staff")                                                                                                                                                                                                                                                                                                                                                                                                                                                                                                                                                                                                                                                                                                                                                   |
| S3               | (MH "Students+" OR AB"student*" OR AB"undergrad*" OR AB"school*" OR TI"student*" OR TI"undergrad*" OR TI"school*")                                                                                                                                                                                                                                                                                                                                                                                                                                                                                                                                                                                                                                                                                                                                                         |
| S4               | (ZT "clinical trial" or ZT "randomized controlled trial" OR MH"clinical trials" OR MH"randomized controlled trial" OR MH "Clinical Research+" OR AB"clinical trial*" OR AB"randomized controlled trial*" OR AB"randomised controlled trial*" OR AB"Clinical Research*" TI"clinical trial*" OR TI"randomized controlled trial*" OR TI"randomised controlled trial*" OR TI"Clinical Research*")                                                                                                                                                                                                                                                                                                                                                                                                                                                                              |
| S5               | S1 AND S2 AND S4                                                                                                                                                                                                                                                                                                                                                                                                                                                                                                                                                                                                                                                                                                                                                                                                                                                           |
| S6               | S5 NOT S3                                                                                                                                                                                                                                                                                                                                                                                                                                                                                                                                                                                                                                                                                                                                                                                                                                                                  |
| S7               | (MH "Qualitative Studies+" OR MH "Observational Methods+" OR qualitativ* OR Editorial* OR Cross-sectional OR "Cross sectional" OR observational OR "systematic review" OR "systematic reviews")                                                                                                                                                                                                                                                                                                                                                                                                                                                                                                                                                                                                                                                                            |
| S8               | S6 NOT S7                                                                                                                                                                                                                                                                                                                                                                                                                                                                                                                                                                                                                                                                                                                                                                                                                                                                  |

## Additional file 2. Search strategies by database.

| <b>4. EMBASE (OVID)</b> |                                                                                                                                                                                                                                                                                                                                                                                                                                                                                                                                                                                                                                                                                                                                                                                                                                                                                                                                                                                                                                                                                                       |
|-------------------------|-------------------------------------------------------------------------------------------------------------------------------------------------------------------------------------------------------------------------------------------------------------------------------------------------------------------------------------------------------------------------------------------------------------------------------------------------------------------------------------------------------------------------------------------------------------------------------------------------------------------------------------------------------------------------------------------------------------------------------------------------------------------------------------------------------------------------------------------------------------------------------------------------------------------------------------------------------------------------------------------------------------------------------------------------------------------------------------------------------|
| 1                       | exp knowledge/ or exp nursing knowledge/ or exp professional knowledge/ or exp knowledge management/ or exp clinical audit/ or exp reminder system/ or exp practice guideline/ or exp training/ or exp learning/ or exp game/ or exp education/ or Knowledge transfer*.ti,ab. or knowledge translation*.ti,ab. or Knowledge mobilisation*.ti,ab. or Knowledge mobilization*.ti,ab. or knowledge uptake.ti,ab. or knowledge uptakes.ti,ab. or Knowledge management.ti,ab. or Knowledge dissemination.ti,ab. or Knowledge exchange.ti,ab. or Translation Research.ti,ab. or Translation* Research*.ti,ab. or Audit*.ti,ab. or Feedback*.ti,ab. or Reminder*.ti,ab. or Implement*.ti,ab. or local opinion leader*.ti,ab. or local consensus process*.ti,ab. or communit*of practice*.ti,ab. or managerial supervision.ti,ab. or clinical incident reporting.ti,ab. or academic detailing.ti,ab. or e-learning.ti,ab. or elearning.ti,ab. or web-based learning.ti,ab. or computer-based learning.ti,ab. or serious game*.ti,ab. or education*.ti,ab. or course*.ti,ab. or train*.ti,ab. or learn*.ti,ab. |
| 2                       | exp nurse/ or exp advanced practice nurse/ or exp expert nurse/ or exp foreign nurse/ or exp licensed practical nurse/ or exp nurse administrator/ or exp nurse consultant/ or exp nurse researcher/ or exp practical nurse/ or exp registered nurse/ or exp staff nurse/ or exp nurse administrator/ or nurse.ti,ab. or nurses.ti,ab. or nursing staff.ti,ab.                                                                                                                                                                                                                                                                                                                                                                                                                                                                                                                                                                                                                                                                                                                                        |
| 3                       | exp controlled study/ or exp randomized controlled trial/ or exp clinical trial/ or exp "clinical trial (topic)"/ or clinical trial*.ab,ti. or randomized controlled trial*.ab,ti. or randomised controlled trial*.ab,ti. or Clinical Research*.ab,ti.                                                                                                                                                                                                                                                                                                                                                                                                                                                                                                                                                                                                                                                                                                                                                                                                                                                |
| 4                       | 1 and 2 and 3                                                                                                                                                                                                                                                                                                                                                                                                                                                                                                                                                                                                                                                                                                                                                                                                                                                                                                                                                                                                                                                                                         |
| 5                       | exp student/ or exp college student/ or exp graduate student/ or exp health student/ or exp phd student/ or exp postgraduate student/ or exp research student/ or exp undergraduate student/ or exp university student/ or student*.ab,ti. or undergrad*.ab,ti.                                                                                                                                                                                                                                                                                                                                                                                                                                                                                                                                                                                                                                                                                                                                                                                                                                       |
| 6                       | exp qualitative research/ or exp case report/ or exp "systematic review"/ or exp "systematic review (topic)"/ or exp editorial/ or qualitativ.ab,ti. or Editorial*.ab,ti. or Cross-sectional.ab,ti. or Cross sectional.ab,ti. or observational.ab,ti. or systematic review*.ab,ti.                                                                                                                                                                                                                                                                                                                                                                                                                                                                                                                                                                                                                                                                                                                                                                                                                    |
| 7                       | 5 or 6                                                                                                                                                                                                                                                                                                                                                                                                                                                                                                                                                                                                                                                                                                                                                                                                                                                                                                                                                                                                                                                                                                |
| 8                       | 4 not 7                                                                                                                                                                                                                                                                                                                                                                                                                                                                                                                                                                                                                                                                                                                                                                                                                                                                                                                                                                                                                                                                                               |
| 9                       | limit 8 to (english language and (clinical trial or randomized controlled trial or controlled clinical trial))                                                                                                                                                                                                                                                                                                                                                                                                                                                                                                                                                                                                                                                                                                                                                                                                                                                                                                                                                                                        |

## Additional file 2. Search strategies by database.

| <b>5. PSYCHINFO (PsycNet)</b> |                                                                                                                                                                                                                                                                                                                                                                                                                                                                                                                                                                                                                                                                                                                                                                                                                                                                                                                                                                                                                                                                                                                                                                                                                                                                                                                                                                                                                                                                                                                                                                                                                                                                                                                                                                                                                                                                                                                                                                                                                                                                                                                                                                                                                                                                                                                                                                                                                                                                                                                                                                                                                                                                                                                                                                                                                                                                                                                                                                                                                                                                                                                                                                                                                                                                                                                                                                                                                                                                                                                                                                                                                                                                                                                                                                                                                                                                                                                                                                                                                                            |
|-------------------------------|--------------------------------------------------------------------------------------------------------------------------------------------------------------------------------------------------------------------------------------------------------------------------------------------------------------------------------------------------------------------------------------------------------------------------------------------------------------------------------------------------------------------------------------------------------------------------------------------------------------------------------------------------------------------------------------------------------------------------------------------------------------------------------------------------------------------------------------------------------------------------------------------------------------------------------------------------------------------------------------------------------------------------------------------------------------------------------------------------------------------------------------------------------------------------------------------------------------------------------------------------------------------------------------------------------------------------------------------------------------------------------------------------------------------------------------------------------------------------------------------------------------------------------------------------------------------------------------------------------------------------------------------------------------------------------------------------------------------------------------------------------------------------------------------------------------------------------------------------------------------------------------------------------------------------------------------------------------------------------------------------------------------------------------------------------------------------------------------------------------------------------------------------------------------------------------------------------------------------------------------------------------------------------------------------------------------------------------------------------------------------------------------------------------------------------------------------------------------------------------------------------------------------------------------------------------------------------------------------------------------------------------------------------------------------------------------------------------------------------------------------------------------------------------------------------------------------------------------------------------------------------------------------------------------------------------------------------------------------------------------------------------------------------------------------------------------------------------------------------------------------------------------------------------------------------------------------------------------------------------------------------------------------------------------------------------------------------------------------------------------------------------------------------------------------------------------------------------------------------------------------------------------------------------------------------------------------------------------------------------------------------------------------------------------------------------------------------------------------------------------------------------------------------------------------------------------------------------------------------------------------------------------------------------------------------------------------------------------------------------------------------------------------------------------|
| #1                            | <p>((((title: ("Nurses")) OR (title: ("nurse")) OR (title: ("nursing staff")))) OR (((abstract: ("Nurses")) OR (abstract: ("nurse")) OR (abstract: ("nursing staff")))) OR (((IndexTermsFilt: ("Nurses")) OR (IndexTermsFilt: ("Psychiatric Nurses")) OR (IndexTermsFilt: ("Public Health Service Nurses")) OR ((abstract: ("Nurses")) OR (abstract: ("nurse")) OR (abstract: ("nursing staff")) OR (title: ("Nurses")) OR (title: ("nurse")) OR (title: ("nursing staff"))))))))</p>                                                                                                                                                                                                                                                                                                                                                                                                                                                                                                                                                                                                                                                                                                                                                                                                                                                                                                                                                                                                                                                                                                                                                                                                                                                                                                                                                                                                                                                                                                                                                                                                                                                                                                                                                                                                                                                                                                                                                                                                                                                                                                                                                                                                                                                                                                                                                                                                                                                                                                                                                                                                                                                                                                                                                                                                                                                                                                                                                                                                                                                                                                                                                                                                                                                                                                                                                                                                                                                                                                                                                      |
| #2                            | <p>((((title: ("Knowledge transfer")) OR (title: ("Knowledge transfers")) OR (title: ("knowledge translations")) OR (title: ("Knowledge Translation")) OR (title: ("Knowledge mobilisation")) OR (title: ("Knowledge mobilisations")) OR (title: ("Knowledge mobilization")) OR (title: ("Knowledge mobilizations")) OR (title: ("knowledge uptake")) OR (title: ("knowledge uptakes")) OR (title: ("Knowledge management")) OR (title: ("Knowledge dissemination")) OR (title: ("Knowledge exchange ")) OR (title: ("Translation Research")) OR (title: ("Translation Researches")) OR (title: ("Translational Research")) OR (title: ("Translational Researches")) OR (title: (Audit)) OR (title: (Audits)) OR (title: (Feedback*)) OR (title: (Reminder*)) OR (title: (Implement*)) OR (title: ("local opinion leader")) OR (title: ("local opinion leaders")) OR (title: ("local consensus process")) OR (title: ("local consensus processes")) OR (title: ("communities of practice")) OR (title: ("community of practices")) OR (title: ("community of practice")) OR (title: ("managerial supervision")) OR (title: ("clinical incident reporting")) OR (title: ("academic detailing")) OR (title: ("e-learning")) OR (title: ("elearning")) OR (title: ("web-based learning")) OR (title: ("computer-based learning")) OR (title: ("serious game")) OR (title: ("serious games")) OR (title: (education*)) OR (title: (course)) OR (title: (courses)) OR (title: (train*)) OR (title: (learn*)) OR ((abstract: ("Knowledge transfer")) OR (abstract: ("Knowledge transfers")) OR (abstract: ("knowledge translations")) OR (abstract: ("Knowledge Translation")) OR (abstract: ("Knowledge mobilisation")) OR (abstract: ("Knowledge mobilizations")) OR (abstract: ("Knowledge mobilization")) OR (abstract: ("Knowledge mobilizations")) OR (abstract: ("knowledge uptake")) OR (abstract: ("knowledge uptakes")) OR (abstract: ("Knowledge management")) OR (abstract: ("Knowledge dissemination")) OR (abstract: ("Knowledge exchange ")) OR (abstract: ("Translation Research")) OR (abstract: ("Translation Researches")) OR (abstract: ("Translational Research")) OR (abstract: ("Translational Researches")) OR (abstract: (Audit)) OR (abstract: (Audits)) OR (abstract: (Feedback*)) OR (abstract: (Reminder*)) OR (abstract: (Implement*)) OR (abstract: ("local opinion leader")) OR (abstract: ("local opinion leaders")) OR (abstract: ("local consensus process")) OR (abstract: ("local consensus processes")) OR (abstract: ("communities of practice")) OR (abstract: ("community of practices")) OR (abstract: ("community of practice")) OR (abstract: ("managerial supervision")) OR (abstract: ("clinical incident reporting")) OR (abstract: ("academic detailing")) OR (abstract: ("e-learning")) OR (abstract: ("elearning")) OR (abstract: ("web-based learning")) OR (abstract: ("computer-based learning")) OR (abstract: ("serious game")) OR (abstract: ("serious games")) OR (abstract: (education*)) OR (abstract: (course)) OR (abstract: (courses)) OR (abstract: (train*)) OR (abstract: (learn*))))) OR (((IndexTermsFilt: ("Knowledge (General)")) OR (IndexTermsFilt: ("Declarative Knowledge")) OR (IndexTermsFilt: ("Experience Level")) OR (IndexTermsFilt: ("Familiarity")) OR (IndexTermsFilt: ("Health Knowledge")) OR (IndexTermsFilt: ("Job Knowledge")) OR (IndexTermsFilt: ("Knowledge Level")) OR (IndexTermsFilt: ("Knowledge Management")) OR (IndexTermsFilt: ("Knowledge Transfer")) OR (IndexTermsFilt: ("Literacy")) OR (IndexTermsFilt: ("Procedural Knowledge")) OR (IndexTermsFilt: ("Truth")) OR (IndexTermsFilt: ("Wisdom")) OR (IndexTermsFilt: ("Knowledge Management")) OR (IndexTermsFilt: ("Knowledge Representation")) OR (IndexTermsFilt: ("Semantic Networks")) OR (IndexTermsFilt: ("Knowledge Transfer")) OR (IndexTermsFilt: ("Health Knowledge")) OR (IndexTermsFilt: ("Auditory Feedback")) OR (IndexTermsFilt: ("Delayed Auditory Feedback"))))))))</p> |
| #3                            | <p>((((IndexTermsFilt: ("Randomized Clinical Trials")) OR (IndexTermsFilt: ("Randomized Controlled Trials")))) OR (((title: ("clinical study")) OR (title: ("Guideline*")) OR (title:</p>                                                                                                                                                                                                                                                                                                                                                                                                                                                                                                                                                                                                                                                                                                                                                                                                                                                                                                                                                                                                                                                                                                                                                                                                                                                                                                                                                                                                                                                                                                                                                                                                                                                                                                                                                                                                                                                                                                                                                                                                                                                                                                                                                                                                                                                                                                                                                                                                                                                                                                                                                                                                                                                                                                                                                                                                                                                                                                                                                                                                                                                                                                                                                                                                                                                                                                                                                                                                                                                                                                                                                                                                                                                                                                                                                                                                                                                  |

## Additional file 2. Search strategies by database.

|    |                                                                                                                                                                                                                                                                                                                                                                                                                                                                                                                                                                                                                                                                                                                                                                                                                                                                                                                                                                                                                                                                                                                                                                                                                                                                                   |
|----|-----------------------------------------------------------------------------------------------------------------------------------------------------------------------------------------------------------------------------------------------------------------------------------------------------------------------------------------------------------------------------------------------------------------------------------------------------------------------------------------------------------------------------------------------------------------------------------------------------------------------------------------------------------------------------------------------------------------------------------------------------------------------------------------------------------------------------------------------------------------------------------------------------------------------------------------------------------------------------------------------------------------------------------------------------------------------------------------------------------------------------------------------------------------------------------------------------------------------------------------------------------------------------------|
|    | <p>("Evaluation Studies")) OR ((title: ("clinical trial*")) OR ((title: ("randomized controlled trial*")) OR ((title: ("randomised controlled trial*")) OR ((title: ("Clinical Research*")) OR ((title: ("controlled stud*")) OR (((abstract: ("clinical study")) OR ((abstract: ("Guideline*")) OR ((abstract: ("Evaluation Studies")) OR ((abstract: ("clinical trial*")) OR ((abstract: ("randomized controlled trial*")) OR ((abstract: ("randomised controlled trial*")) OR ((abstract: ("Clinical Research*")) OR ((abstract: ("controlled stud*"))))))))</p>                                                                                                                                                                                                                                                                                                                                                                                                                                                                                                                                                                                                                                                                                                               |
| #4 | <p>(((((title: ("qualitativ*")) OR ((title: ("Editorial*")) OR ((title: ("Cross-sectional")) OR ((title: ("Cross sectional")) OR ((title: ("observational")) OR ((title: ("systematic review")) OR ((title: ("systematic reviews")))) OR (((abstract: ("qualitativ*")) OR ((abstract: ("Editorial*")) OR ((abstract: ("Cross-sectional")) OR ((abstract: ("Cross sectional")) OR ((abstract: ("observational")) OR ((abstract: ("systematic review")) OR ((abstract: ("systematic reviews")))) OR (((IndexTermsFilt: ("Qualitative Methods")) OR ((IndexTermsFilt: ("Focus Group")) OR ((IndexTermsFilt: ("Grounded Theory")) OR ((IndexTermsFilt: ("Interpretative Phenomenological Analysis")) OR ((IndexTermsFilt: ("Narrative Analysis")) OR ((IndexTermsFilt: ("Semi-Structured Interview")) OR ((IndexTermsFilt: ("Thematic Analysis")) OR ((IndexTermsFilt: ("Qualitative Measures")) OR ((IndexTermsFilt: ("Systematic Review")))))))) OR (((title: ("Student*")) OR ((title: ("School*")) OR ((title: ("undergrad*")) OR (((abstract: ("Student*")) OR ((abstract: ("School*")) OR ((abstract: ("undergrad*")))) OR (((IndexTermsFilt: ("Nursing Students")) OR ((IndexTermsFilt: ("Nursery School Students")) OR ((IndexTermsFilt: ("Postgraduate Students"))))))))</p> |
| #5 | <p>((1 AND 2 AND 3) NOT 4)</p>                                                                                                                                                                                                                                                                                                                                                                                                                                                                                                                                                                                                                                                                                                                                                                                                                                                                                                                                                                                                                                                                                                                                                                                                                                                    |

## Additional file 2. Search strategies by database.

| <b>6. Education Resources Information Center (ERIC)</b> |                                                                                                                                                                                                                                                                                                                                                                                                                                                                                                                                                                                                                                                                                                                                                                                                                                                                                                                                                                                                                                                                                                                                                                                                                                                                                                                                                                                                                                                                                                                                |
|---------------------------------------------------------|--------------------------------------------------------------------------------------------------------------------------------------------------------------------------------------------------------------------------------------------------------------------------------------------------------------------------------------------------------------------------------------------------------------------------------------------------------------------------------------------------------------------------------------------------------------------------------------------------------------------------------------------------------------------------------------------------------------------------------------------------------------------------------------------------------------------------------------------------------------------------------------------------------------------------------------------------------------------------------------------------------------------------------------------------------------------------------------------------------------------------------------------------------------------------------------------------------------------------------------------------------------------------------------------------------------------------------------------------------------------------------------------------------------------------------------------------------------------------------------------------------------------------------|
| #1                                                      | TI ((Knowledge N1 (transfer* OR translation* OR mobilisation* OR mobilization* OR uptake* OR management OR dissemination* OR exchange*)) OR (Translation* N1 Research*) OR Audit* OR Feedback* OR Reminder* OR Implement* OR "local opinion leader*" OR "local consensus process*" OR "communities of practice" OR "community of practices" OR "community of practice" OR "managerial supervision" OR "clinical incident reporting" OR "academic detailing" OR "e-learning" OR "elearning" OR "web-based learning" OR "computer-based learning" OR "serious game*" OR course* OR train* OR learn* OR education*) OR AB ((Knowledge N1 (transfer* OR translation* OR mobilisation* OR mobilization* OR uptake* OR management OR dissemination* OR exchange*)) OR (Translation* N1 Research*) OR Audit* OR Feedback* OR Reminder* OR Implement* OR "local opinion leader*" OR "local consensus process*" OR "communities of practice" OR "community of practices" OR "community of practice" OR "managerial supervision" OR "clinical incident reporting" OR "academic detailing" OR "e-learning" OR "elearning" OR "web-based learning" OR "computer-based learning" OR "serious game*" OR course* OR train* OR learn* OR education*) OR DE ("Feedback (Response)" OR "Knowledge Management" OR "Communities of Practice" OR "Information Utilization" OR "Research Utilization" OR "Information Transfer" OR "Knowledge Level" OR "Learning" OR "Health Education" OR "Education" OR "Guidelines" OR "Audits (Verification)")) |
| #2                                                      | TI (nurse OR nurses OR "nursing staff") OR AB (nurse OR nurses OR "nursing staff") OR DE ("Nurses")                                                                                                                                                                                                                                                                                                                                                                                                                                                                                                                                                                                                                                                                                                                                                                                                                                                                                                                                                                                                                                                                                                                                                                                                                                                                                                                                                                                                                            |
| #3                                                      | TI ("clinical trial*" OR "randomized controlled trial*" OR "randomised controlled trial*" OR "Clinical Research*" OR "clinical stud*" OR guideline* OR "evaluation stud*" OR "controlled stud*") OR AB ("clinical trial*" OR "randomized controlled trial*" OR "randomised controlled trial*" OR "Clinical Research*" OR "clinical stud*" OR guideline* OR "evaluation stud*" OR "controlled stud*") OR DE ("Randomized Controlled Trials")                                                                                                                                                                                                                                                                                                                                                                                                                                                                                                                                                                                                                                                                                                                                                                                                                                                                                                                                                                                                                                                                                    |
| #4                                                      | S1 AND S2 AND S3                                                                                                                                                                                                                                                                                                                                                                                                                                                                                                                                                                                                                                                                                                                                                                                                                                                                                                                                                                                                                                                                                                                                                                                                                                                                                                                                                                                                                                                                                                               |
| #5                                                      | TI (Student* OR School* OR undergrad* OR qualitative OR editorial* OR "Cross-sectional" OR "Cross sectional" OR observational OR "systematic review*") OR AB (Student* OR School* OR undergrad* OR qualitative OR editorial* OR "Cross-sectional" OR "Cross sectional" OR observational OR "systematic review*") OR DE ("Nursing Education" OR "Nursing Students" OR "Students" OR "College Students" OR "Elementary School Students" OR "Middle School Students" OR "Secondary School Students" OR "Qualitative Research" OR "Grounded Theory" OR "Literature Reviews" OR "State of the Art Reviews" OR "Case Studies")                                                                                                                                                                                                                                                                                                                                                                                                                                                                                                                                                                                                                                                                                                                                                                                                                                                                                                       |
| #6                                                      | S4 NOT S5                                                                                                                                                                                                                                                                                                                                                                                                                                                                                                                                                                                                                                                                                                                                                                                                                                                                                                                                                                                                                                                                                                                                                                                                                                                                                                                                                                                                                                                                                                                      |
| #7                                                      | Limiters - Language: English, French                                                                                                                                                                                                                                                                                                                                                                                                                                                                                                                                                                                                                                                                                                                                                                                                                                                                                                                                                                                                                                                                                                                                                                                                                                                                                                                                                                                                                                                                                           |
