# Supplementary material for: Effects of implementation strategies on nursing practice and patient outcomes: a comprehensive systematic review and meta-analysis
Source: PubMed Central journal article supplement — Implement Sci. 2024 Sep 30;19:68. doi: 10.1186/s13012-024-01398-0 (PMC11443951; doi:10.1186/s13012-024-01398-0), 2024-09-30
Supplement: 13012_2024_1398_MOESM4_ESM.pdf [file 13012_2024_1398_MOESM4_ESM.pdf]

#### Additional file 4. Excluded articles at full text assessment stage and reasons for exclusion.

| Title                                                                                                                                                                                        | Authors                                                                                                                                                                                                                  | Year | Journal                                           | Volume | Issue        | Pages     | DOI                                                 | Covidence # | Exclusion reason                                                              |
|----------------------------------------------------------------------------------------------------------------------------------------------------------------------------------------------|--------------------------------------------------------------------------------------------------------------------------------------------------------------------------------------------------------------------------|------|---------------------------------------------------|--------|--------------|-----------|-----------------------------------------------------|-------------|-------------------------------------------------------------------------------|
| 'ALLHAT' and innovations in nursing: how a project based on findings of the Antihypertensive and Lipid-Lowering Treatment to Prevent Heart Attack Trial is changing practice at one hospital | Phillips-Edwards, A.; Collins-Smith, R.; Camacho Del Rio, G.; Brown, C.; Wu, L.; Singh, H.                                                                                                                               | 2007 | American Journal of Nursing                       | 107    | 5            | 72C-H     |                                                     | #9615       | Exclusion reason: Wrong outcomes (not related to behaviour/clinical practice) |
| A 3-armed randomized controlled trial of nurses' continuing education meetings on adverse drug reactions                                                                                     | Sarayani, A.; Naderi-Behdani, F.; Hadavand, N.; Javadi, M.; Farsad, F.; Hadjibabaie, M.; Gholami, K.                                                                                                                     | 2015 | J Contin Educ Health Prof                         | 35     | 2            | 123-30    | 10.1002/chp.21276                                   | #14515      | Exclusion reason: Wrong outcomes (not related to behaviour/clinical practice) |
| A Clinical Decision Support System to Prevent Aggression and Reduce Restrictive Practices in a Forensic Mental Health Service                                                                | Griffith, J. J.; Meyer, D.; Maguire, T.; Ogloff, J. R. P.; Daffern, M.                                                                                                                                                   | 2021 | Psychiatr Serv                                    | 72     | 8            | 885-890   | 10.1176/appi.ps.202000315                           | #20582      | Exclusion reason: Wrong intervention (not an implementation intervention)     |
| A clinical trial of chronic care diabetic clinics in general practice in the United Arab Emirates: a preliminary analysis                                                                    | Reed, R. L.; Revel, A. O.; Carter, A.; Saadi, H. F.; Dunn, E. V.                                                                                                                                                         | 2001 | Arch Physiol Biochem                              | 109    | 3            | 272-80    | 10.1076/apab.109.3.272.11591                        | #2329       | Exclusion reason: Wrong outcomes (not related to behaviour/clinical practice) |
| A clinical trial of tailored office systems for preventive service delivery: The Study to Enhance Prevention by Understanding Practice (STEP-UP)                                             | Goodwin, M. A.; Zyzanski, S. J.; Zronek, S.; Ruhe, M.; Weyer, S. M.; Konrad, N.; Esola, D.; Stange, K. C.                                                                                                                | 2001 | American Journal of Preventive Medicine           | 21     | 1            | 20-28     | http://dx.doi.org/10.1016/S0749-3797%2801%2900310-5 | #3118       | Exclusion reason: Wrong population (not nurses)                               |
| A cluster randomised trial: Comfort around dying in older people                                                                                                                             | Beernaert, K.; Smets, T.; Cohen, J.; Verhofstede, R.; Costantini, M.; Eecloo, K.; Van Den Noortgate, N.; Deliens, L.                                                                                                     | 2016 | European Geriatric Medicine                       | 7      | Supplement 1 | S21       |                                                     | #14707      | Exclusion reason: Wrong type of paper (not a research article)                |
| A Cluster-Randomized Clinical Trial to Decrease Prescription Opioid Misuse: Improving the Safety of Opioid Therapy (ISOT)                                                                    | Morasco, B. J.; Adams, M. H.; Hooker, E. R.; Maloy, P. E.; Krebs, E. E.; Lovejoy, T. I.; Saha, S.; Dobscha, S. K.                                                                                                        | 2022 | JOURNAL OF GENERAL INTERNAL MEDICINE              | 37     | 15           | 3805-3813 | https://dx.doi.org/10.1007/s11606-022-07476-7       | #21476      | Exclusion reason: Wrong population (not nurses)                               |
| A cluster-randomized trial of an educational intervention to reduce the use of physical restraints with psychogeriatric nursing home residents                                               | Huizing, A. R.; Hamers, J. P.; Gulpers, M. J.; Berger, M. P.                                                                                                                                                             | 2009 | J Am Geriatr Soc                                  | 57     | 7            | 1139-48   | 10.1111/j.1532-5415.2009.02309.x                    | #8321       | Exclusion reason: Wrong outcomes (not related to behaviour/clinical practice) |
| A clustered randomized control trial of pocket alcohol-based hand rubs intervention in the control of infections in long-term care facilities                                                | Yeung, Wing Kin                                                                                                                                                                                                          | 2012 |                                                   | 73     |              | 3573-3573 |                                                     | #17030      | Exclusion reason: Wrong population (not nurses)                               |
| A collaborative care intervention to improve opioid prescribing among providers caring for persons with HIV: Impact on satisfaction, confidence, and trust                                   | Colasanti, J. A.; Del Rio, C.; Cheng, D. M.; Liebschutz, J. M.; Lira, M. C.; Tsui, J. I.; Walley, A. Y.; Forman, L. S.; Root, C.; Shanahan, C. W.; Briden, C. L.; Harris, C.; Outlaw, K.; Armstrong, W. S.; Samet, J. H. | 2022 | Drug Alcohol Depend                               | 231    |              | 109250    | 10.1016/j.drugalcdep.2021.109250                    | #20201      | Exclusion reason: Wrong population (not nurses)                               |
| A comparative study on effect of e-learning and instructor-led methods on nurses' documentation competency                                                                                   | Abbaszadeh, Abbas; Sabeghi, Hakimeh; Borhani, Fariba; Heydari, Abbas                                                                                                                                                     | 2011 | Iranian journal of nursing and midwifery research | 16     | 3            | 235       |                                                     | #19717      | Exclusion reason: Wrong outcomes (not related to behaviour/clinical practice) |
| A comprehensive assessment program to improve blood-administering practices using the FOCUS-PDCA model                                                                                       | Saxena, S.; Ramer, L.; Shulman, I. A.                                                                                                                                                                                    | 2004 | Transfusion                                       | 44     | 9            | 1350-6    | 10.1111/j.1537-                                     | #1396       | Exclusion reason: Wrong study design (not a RCT)                              |

#### Additional file 4. Excluded articles at full text assessment stage and reasons for exclusion.

|                                                                                                                                                                                       |                                                                                                                                                                   |      |                                                                                                |              |    |           |                                              |        |                                                                                      |
|---------------------------------------------------------------------------------------------------------------------------------------------------------------------------------------|-------------------------------------------------------------------------------------------------------------------------------------------------------------------|------|------------------------------------------------------------------------------------------------|--------------|----|-----------|----------------------------------------------|--------|--------------------------------------------------------------------------------------|
|                                                                                                                                                                                       |                                                                                                                                                                   |      |                                                                                                |              |    |           | 2995.2004.03<br>117.x                        |        | or a nonrandomized<br>controlled study)                                              |
| A computerized intervention to decrease the use of calcium channel blockers in hypertension                                                                                           | Rossi, R. A.; Every, N. R.                                                                                                                                        | 1997 | J Gen Intern Med                                                                               | 12           | 11 | 672-8     |                                              | #3968  | Exclusion reason: Wrong population (not nurses)                                      |
| A controlled evaluation of a lifts and transfer educational program for nurses                                                                                                        | Gray, J.; Cass, J.; Harper, D. W.; O'Hara, P. A.                                                                                                                  | 1996 | Geriatr Nurs                                                                                   | 17           | 2  | May-81    |                                              | #4225  | Exclusion reason: Wrong outcomes (not related to behaviour/clinical practice)        |
| A controlled quality improvement trial to reduce the use of physical restraints in older hospitalized adults                                                                          | Enns, E.; Rhemtulla, R.; Ewa, V.; Fruetel, K.; Holroyd-Leduc, J. M.                                                                                               | 2014 | J Am Geriatr Soc                                                                               | 62           | 3  | 541-5     | 10.1111/jgs.12710                            | #15977 | Exclusion reason: Wrong study design (not a RCT or a nonrandomized controlled study) |
| A controlled trial of an intervention to increase resident choice in long term care                                                                                                   | Schnelle, J. F.; Rahman, A.; Durkin, D. W.; Beuscher, L.; Choi, L.; Simmons, S. F.                                                                                | 2013 | J Am Med Dir Assoc                                                                             | 14           | 5  | 345-51    | 10.1016/j.jamda.2012.11.013                  | #16311 | Exclusion reason: Wrong population (not nurses)                                      |
| A cooperative communication intervention for nursing home staff and family members of residents                                                                                       | Pillemer, K.; Suitor, J. J.; Henderson, C. R., Jr.; Meador, R.; Schultz, L.; Robison, J.; Hegeman, C.                                                             | 2003 | Gerontologist                                                                                  | 43 Spec No 2 |    | 96-106    |                                              | #1975  | Exclusion reason: Wrong population (not nurses)                                      |
| A course for nurses to handle difficult communication situations. A randomized controlled trial of impact on self-efficacy and performance                                            | Doyle, D.; Copeland, H. L.; Bush, D.; Stein, L.; Thompson, S.                                                                                                     | 2011 | Patient Educ Couns                                                                             | 82           | 1  | 100-9     | 10.1016/j.pec.2010.02.013                    | #7321  | Exclusion reason: Wrong outcomes (not related to behaviour/clinical practice);       |
| A flowchart system to improve fall data documentation in a long-term care institution: a pilot study                                                                                  | Montero-Odasso, M.; Levinson, P.; Gore, B.; Epid, D.; Tremblay, L.; Bergman, H.                                                                                   | 2007 | J Am Med Dir Assoc                                                                             | 8            | 5  | 300-6     | 10.1016/j.jamda.2006.12.031                  | #9670  | Exclusion reason: Wrong study design (not a RCT or a nonrandomized controlled study) |
| A knowledge translation intervention to improve cholesterol management in diabetes in remote aboriginal communities                                                                   | Bhattacharyya, Onil Kumar Yves                                                                                                                                    | 2007 |                                                                                                | 68           |    | 3668-3668 |                                              | #9801  | Exclusion reason: Wrong type of paper (not a research article)                       |
| A mixed-methods evaluation of the effectiveness of tailored smoking cessation training for healthcare practitioners who work with older people                                        | Kerr, S.; Whyte, R.; Watson, H.; Tolson, D.; McFadyen, A. K.                                                                                                      | 2011 | Worldviews on evidence-based nursing / Sigma Theta Tau International, Honor Society of Nursing | 8            | 3  | 177-186   |                                              | #6647  | Exclusion reason: Wrong population (not nurses)                                      |
| A Mobile Device App to Reduce Time to Drug Delivery and Medication Errors During Simulated Pediatric Cardiopulmonary Resuscitation: A Randomized Controlled Trial                     | Siebert, Johan N.; Ehrler, Frederic; Combescure, Christophe; Lacroix, Laurence; Haddad, Kevin; Sanchez, Oliver; Gervaix, Alain; Lovis, Christian; Manzano, Sergio | 2017 | Journal of Medical Internet Research                                                           | 19           | 2  | 01-Jan    | 10.2196/jmir.7005                            | #12442 | Exclusion reason: Wrong outcomes (not related to behaviour/clinical practice)        |
| A multi-faceted tailored strategy to implement an electronic clinical decision support system for pressure ulcer prevention in nursing homes: a two-armed randomized controlled trial | Beeckman, D.; Clays, E.; Van Hecke, A.; Vanderwee, K.; Schoonhoven, L.; Verhaeghe, S.                                                                             | 2013 | Int J Nurs Stud                                                                                | 50           | 4  | 475-86    | 10.1016/j.ijnursta.2012.09.007               | #16913 | Exclusion reason: Wrong population (not nurses)                                      |
| A multicenter study using positive deviance for improving hand hygiene compliance                                                                                                     | Marra, A. R.; Noritomi, D. T.; Westheimer Cavalcante, A. J.; Sampaio Camargo, T. Z.; Bortoleto, R. P.; Durao Junior, M. S.; Apisarnthanarak, A.;                  | 2013 | American Journal of Infection Control                                                          | 41           | 11 | 984-988   | http://dx.doi.org/10.1016/j.ajic.2013.05.013 | #16977 | Exclusion reason: Wrong population (not nurses);                                     |

**Additional file 4. Excluded articles at full text assessment stage and reasons for exclusion.**

|                                                                                                                                                                            |                                                                                                                                                                        |      |                                                       |     |      |           |                                           |        |                                                                               |                                                 |
|----------------------------------------------------------------------------------------------------------------------------------------------------------------------------|------------------------------------------------------------------------------------------------------------------------------------------------------------------------|------|-------------------------------------------------------|-----|------|-----------|-------------------------------------------|--------|-------------------------------------------------------------------------------|-------------------------------------------------|
|                                                                                                                                                                            | Laselva, C.; De Souza Pimentel, W.; Rolim Ferraz, L. J.; Fatima Dos Santos Cardoso, M.; Da Silva Victor, E.; Pavao Dos Santos, O. F.; Neto, M. C.; Edmond, M. B.       |      |                                                       |     |      |           |                                           |        |                                                                               |                                                 |
| A multicentre randomised controlled trial of an intervention to improve the accuracy of linear growth measurement                                                          | Lipman, T. H.; Hench, K. D.; Benyi, T.; Delaune, J.; Gilluly, K. A.; Johnson, L.; Johnson, M. G.; McKnight-Menci, H.; Shorkey, D.; Shults, J.; Waite, F. L.; Weber, C. | 2004 | Arch Dis Child                                        | 89  | 4    | 342-6     |                                           | #1442  | Exclusion reason: Wrong population (not nurses)                               |                                                 |
| A multicentre randomised controlled trial of reciprocal lung cancer peer review and supported quality improvement: results from the improving lung cancer outcomes project | Russell, G. K.; Jimenez, S.; Martin, L.; Stanley, R.; Peake, M. D.; Woolhouse, I.                                                                                      | 2014 | Br J Cancer                                           | 110 | 8    | 1936-42   | 10.1038/bjc.2014.146                      | #15924 | Exclusion reason: Wrong population (not nurses)                               |                                                 |
| A multicentre randomized controlled trial of an intervention to improve the accuracy of linear growth measurement                                                          | Lipman, T. H.; Hench, K. D.; Benyi, T.; Delaune, J.; Gilluly, K. A.; Johnson, L.; Johnson, M. G.; McKnight-Menci, H.; Shorkey, D.; Shults, J.; Waite, F. L.; Weber, C. | 2004 | Archives of Disease in Childhood                      | 89  | 4    | 342-346   | http://dx.doi.org/10.1136/adc.2003.030072 | #1441  | Exclusion reason: Wrong population (not nurses)                               |                                                 |
| A multidisciplinary approach for improving services in primary care: randomised controlled trial of screening for haemoglobin disorders                                    | Modell, M.; Wonke, B.; Anionwu, E.; Khan, M.; Tai, S. S.; Lloyd, M.; Modell, B.                                                                                        | 1998 | BMJ                                                   | 317 | 7161 | 788-91    |                                           | #3692  | Exclusion reason: Wrong outcomes (not related to behaviour/clinical practice) |                                                 |
| A multidisciplinary community hospital program for early and rapid resuscitation of shock in nontrauma patients                                                            | Sebat, F.; Johnson, D.; Musthafa, A. A.; Watnik, M.; Moore, S.; Henry, K.; Saari, M.                                                                                   | 2005 | CHEST                                                 | 127 | 5    | 1729-43   | 10.1378/chest.127.5.1729                  | #725   | Exclusion reason: Wrong outcomes (not related to behaviour/clinical practice) |                                                 |
| A Multifaceted Antimicrobial Stewardship Program for the Treatment of Uncomplicated Cystitis in Nursing Home Residents                                                     | Nace, D. A.; Hanlon, J. T.; Crnich, C. J.; Drinka, P. J.; Schweon, S. J.; Anderson, G.; Perera, S.                                                                     | 2020 | JAMA Intern Med                                       | 180 | 7    | 944-951   | 10.1001/jamainternmed.2020.1256           | #18512 | Exclusion reason: Wrong outcomes (not related to behaviour/clinical practice) |                                                 |
| A multifaceted intervention improves antibiotic stewardship for skin and soft tissues infections                                                                           | May, L.; Nguyen, M. H.; Trajano, R.; Tancredi, D.; Aliyev, E. R.; Mooso, B.; Anderson, C.; Ondak, S.; Yang, N.; Cohen, S.; Wiedeman, J.; Miller, L. G.                 | 2020 | American Journal of Emergency Medicine.               |     |      |           |                                           |        | #18618                                                                        | Exclusion reason: Wrong population (not nurses) |
| A multifaceted intervention improves antibiotic stewardship for skin and soft tissues infections                                                                           | May, L.; Nguyen, M. H.; Trajano, R.; Tancredi, D.; Aliyev, E. R.; Mooso, B.; Anderson, C.; Ondak, S.; Yang, N.; Cohen, S.; Wiedeman, J.; Miller, L. G.                 | 2021 | Am J Emerg Med                                        | 46  |      | 374-381   | 10.1016/j.ajem.2020.10.017                | #21355 | Exclusion reason: Wrong population (not nurses)                               |                                                 |
| A Multifaceted Intervention to Implement Guidelines Did Not Affect Hospitalization Rates for Nursing Home-Acquired Pneumonia                                               | Hutt, E.; Ruscini, J. M.; Linnebur, S. A.; Fish, D. N.; Oman, K. S.; Fink, R. M.; Radcliff, T. A.; Van Dorsten, B.; Liebrecht, D.; Fish, R.; McNulty, M. C.            | 2011 | Journal of the American Medical Directors Association | 12  | 7    | 499-507   | 10.1016/j.jamd.2010.03.011                | #6697  | Exclusion reason: Wrong outcomes (not related to behaviour/clinical practice) |                                                 |
| A multifaceted intervention to implement guidelines improved treatment of nursing home-acquired pneumonia in a state veterans home                                         | Hutt, E.; Ruscini, J. M.; Corbett, K.; Radcliff, T. A.; Kramer, A. M.; Williams, E. M.; Liebrecht, D.; Klenke, W.; Hartmann, S.                                        | 2006 | Journal of the American Geriatrics Society            | 54  | 11   | 1694-1700 | 10.1111/j.1532-5415.2006.00937.x          | #10667 | Exclusion reason: Wrong outcomes (not related to behaviour/clinical practice) |                                                 |
| A Multimethod Improvement Project to Strengthen Intermittent Auscultation                                                                                                  | Romano, A. M.; Buxton, M.                                                                                                                                              | 2020 | Journal of Midwifery &                                | 65  | 3    | 362-369   | 10.1111/jmwh.13113                        | #17807 | Exclusion reason: Wrong study design (not a RCT)                              |                                                 |

#### Additional file 4. Excluded articles at full text assessment stage and reasons for exclusion.

|                                                                                                                                                                                                           |                                                                                                                                                                                                                                     |      |                                                        |     |              |           |                                     |        |                                                                                      |
|-----------------------------------------------------------------------------------------------------------------------------------------------------------------------------------------------------------|-------------------------------------------------------------------------------------------------------------------------------------------------------------------------------------------------------------------------------------|------|--------------------------------------------------------|-----|--------------|-----------|-------------------------------------|--------|--------------------------------------------------------------------------------------|
| Practice Among Nurse-Midwives and Nurses                                                                                                                                                                  |                                                                                                                                                                                                                                     |      | Womens Health                                          |     |              |           |                                     |        | or a nonrandomized controlled study)                                                 |
| A multisite randomized trial of the effects of physician education and organizational change in chronic-asthma care: health outcomes of the Pediatric Asthma Care Patient Outcomes Research Team II Study | Lozano, P.; Finkelstein, J. A.; Carey, V. J.; Wagner, E. H.; Inui, T. S.; Fuhlbrigge, A. L.; Soumerai, S. B.; Sullivan, S. D.; Weiss, S. T.; Weiss, K. B.                                                                           | 2004 | Arch Pediatr Adolesc Med                               | 158 | 9            | 875-83    | 10.1001/archpedi.158.9.875          | #1436  | Exclusion reason: Wrong population (not nurses)                                      |
| A new evidence-based model for weight management in primary care: the Counterweight Programme                                                                                                             | Laws, R.                                                                                                                                                                                                                            | 2004 | J Hum Nutr Diet                                        | 17  | 3            | 191-208   | 10.1111/j.1365-277X.2004.00517.x    | #1458  | Exclusion reason: Wrong study design (not a RCT or a nonrandomized controlled study) |
| A nurse-facilitated depression screening program in an army primary care clinic: An evidence-based project                                                                                                | Yackel, Edward E.; McKennan, Madelyn S.; Fox-Deise, Adrianna                                                                                                                                                                        | 2010 | Nursing Research                                       | 59  | Suppl 1      | S58-S65   | 10.1097/NNR.0b013e3181c3cab6        | #7060  | Exclusion reason: Wrong study design (not a RCT or a nonrandomized controlled study) |
| A nursing-implemented sedation protocol and the duration of mechanical ventilation                                                                                                                        | McKinley, S.                                                                                                                                                                                                                        | 2000 | Aust Crit Care                                         | 13  | 2            | Apr-72    |                                     | #2885  | Exclusion reason: Wrong outcomes (not related to behaviour/clinical practice)        |
| A pilot study testing the feasibility of skin temperature monitoring to reduce recurrent foot ulcers in patients with diabetes--a randomized controlled trial                                             | Skafjeld, A.; Iversen, M. M.; Holme, I.; Ribu, L.; Hvaal, K.; Kilhovd, B. K.                                                                                                                                                        | 2015 | BMC Endocr Disord                                      | 15  |              | 55        | 10.1186/s12902-015-0054-x           | #14985 | Exclusion reason: Wrong population (not nurses)                                      |
| A prospective controlled trial of the effect of a multi-faceted intervention on early recognition and intervention in deteriorating hospital patients                                                     | Mitchell, I. A.; McKay, H.; Van Leuvan, C.; Berry, R.; McCutcheon, C.; Avar, B.; Slater, N.; Neeman, T.; Lamberth, P.                                                                                                               | 2010 | Resuscitation                                          | 81  | 6            | 658-66    | 10.1016/j.resuscitation.2010.03.001 | #7183  | Exclusion reason: Wrong population (not nurses)                                      |
| A public health approach to increase treatment of latent TB among household contacts in Brazil                                                                                                            | Bastos, M. L.; Oxlade, O.; Benedetti, A.; Fregonese, F.; Valiquette, C.; Lira, S. C. C.; Carvalho-Cordeiro, D.; Cavalcante, J. R.; Faerstein, E.; Albuquerque, M. F. M.; Cordeiro-Santos, M.; Hill, P. C.; Menzies, D.; Trajman, A. | 2020 | International Journal of Tuberculosis and Lung Disease | 24  | 10           | 1000-1008 |                                     | #19418 | Exclusion reason: Wrong population (not nurses)                                      |
| A quality improvement initiative advancing CLL care practices across four US health systems                                                                                                               | Davids, M. S.; Mato, A. R.; Pagel, J. M.; Lad, T.; Mateka, J. J. L.; Heggen, C.; Carter, J. D.; Sapir, T.                                                                                                                           | 2017 | Blood                                                  | 130 | Supplement 1 |           |                                     | #12803 | Exclusion reason: Wrong type of paper (not a research article)                       |
| A quality improvement intervention to address provider behaviour as it relates to utilisation of CA-MRSA guidelines                                                                                       | Velez, Roseann P.; Becker, Kathleen Lent; Davidson, Patricia; Sloand, Elizabeth                                                                                                                                                     | 2015 | Journal of Clinical Nursing                            | 24  | 04-Mar       | 556-562   | 10.1111/jocn.12684                  | #14342 | Exclusion reason: Wrong population (not nurses)                                      |
| A quality improvement intervention to increase palliative care in nursing homes                                                                                                                           | Hanson, L. C.; Reynolds, K. S.; Henderson, M.; Pickard, C. G.                                                                                                                                                                       | 2005 | J Palliat Med                                          | 8   | 3            | 576-84    | 10.1089/jpm.2005.8.576              | #1001  | Exclusion reason: Wrong population (not nurses)                                      |
| A quasi-experiment assessing the six-months effects of a nurse care coordination program on patient care experiences and clinician teamwork in community health centers                                   | Nembhard, I. M.; Buta, E.; Lee, Y. S. H.; Anderson, D.; Zlateva, I.; Cleary, P. D.                                                                                                                                                  | 2020 | BMC Health Serv Res                                    | 20  | 1            | 137       | 10.1186/s12913-020-4986-0           | #18492 | Exclusion reason: Wrong intervention (not an implementation intervention)            |
| A randomised controlled trial and cost effectiveness study of systematic screening (targeted and total population screening) versus routine practice for the                                              | Swanutt, D.; Hobbs, R.; Fitzmaurice, D.; Mant, J.; Murray, E.; Jowett, S.; Raftery, J.; Bryan, S.; Davies, M.; Lip, G.                                                                                                              | 2004 | BMC Cardiovasc Disord                                  | 4   |              | 12        | 10.1186/1471-2261-4-12              | #1344  | Exclusion reason: Wrong intervention (not an implementation intervention);           |

#### Additional file 4. Excluded articles at full text assessment stage and reasons for exclusion.

|                                                                                                                                                                                                                                                                                       |                                                                                                                                                     |      |                                                                                                                |     |            |                                                 |                                          |        |                                                                                      |  |
|---------------------------------------------------------------------------------------------------------------------------------------------------------------------------------------------------------------------------------------------------------------------------------------|-----------------------------------------------------------------------------------------------------------------------------------------------------|------|----------------------------------------------------------------------------------------------------------------|-----|------------|-------------------------------------------------|------------------------------------------|--------|--------------------------------------------------------------------------------------|--|
| detection of atrial fibrillation in the over 65s: (SAFE) [ISRCTN19633732]                                                                                                                                                                                                             |                                                                                                                                                     |      |                                                                                                                |     |            |                                                 |                                          |        |                                                                                      |  |
| A randomised controlled trial and cost effectiveness study of systematic screening (targeted and total population screening) versus routine practice for the detection of atrial fibrillation in the over 65s: (SAFE) [ISRCTN19633732]                                                | Swancutt, D.; Hobbs, R.; Fitzmaurice, D.; Mant, J.; Murray, E.; Jowett, S.; Raftery, J.; Bryan, S.; Davies, M.; Lip, G.                             | 2004 | BMC Cardiovascular Disorders                                                                                   | 4   |            | 12                                              | http://dx.doi.org/10.1186/1471-2261-4-12 | #1343  | Exclusion reason: Wrong type of paper (not a research article)                       |  |
| A randomised controlled trial of clinical supervision: Selected findings from a novel Australian attempt to establish the evidence base for causal relationships with quality of care and patient outcomes, as an informed contribution to mental health nursing practice development | White, Edward; Winstanley, Julie                                                                                                                    | 2010 | Journal of Research in Nursing                                                                                 | 15  | 2          | 151-167                                         | 10.1177/1744987109357816                 | #7085  | Exclusion reason: Wrong study design (not a RCT or a nonrandomized controlled study) |  |
| A randomized controlled trial assessing the impact of an innovative approach to educating new to practice nurses                                                                                                                                                                      | Lengetti, Evelyn                                                                                                                                    | 2018 |                                                                                                                | 78  |            | No Pagination Specified-No Pagination Specified |                                          | #11180 | Exclusion reason: Wrong type of paper (not a research article)                       |  |
| A randomized controlled trial assessing the impact of an innovative approach to educating new to practice nurses                                                                                                                                                                      | Lengetti, Evelyn                                                                                                                                    | 2016 | Randomized controlled trial assessing the impact of an innovative approach to educating new to practice nurses |     |            | 01-Jan                                          |                                          | #13672 | Exclusion reason: Wrong type of paper (not a research article)                       |  |
| A Randomized Controlled Trial of a Digital Adaptation of the WHELD Person-Centered Nursing Home Training Program                                                                                                                                                                      | McDermid, J.; Da Silva, M. V.; Williams, G.; Khan, Z.; Corbett, A.; Ballard, C.                                                                     | 2022 | J Am Med Dir Assoc                                                                                             | 23  | 7          | 1166-1170                                       | 10.1016/j.jamd.2022.02.016               | #21372 | Exclusion reason: Wrong population (not nurses)                                      |  |
| A randomized controlled trial of a serious illness communication workshop for nurses in critical care...Dynamics of Critical Care 2018, Calgary, Alberta Canada, Sept 24-25th 2018                                                                                                    | Maries, Maria Mia; Kryworuchko, Jennifer; Bains, Vininder Kour; Venis, Janie; Robinson, Wallace; McNamee, Kate; Willett, Katherine; Bakke, Danielle | 2018 | Canadian Journal of Critical Care Nursing                                                                      | 29  | 2          | 58-58                                           |                                          | #11121 | Exclusion reason: Wrong type of paper (not a research article)                       |  |
| A randomized controlled trial of an intervention designed to improve the care given in general practice to Type II diabetic patients: patient outcomes and professional ability to change behaviour                                                                                   | Pill, R.; Stott, N. C.; Rollnick, S. R.; Rees, M.                                                                                                   | 1998 | Fam Pract                                                                                                      | 15  | 3          | 229-35                                          |                                          | #3672  | Exclusion reason: Wrong population (not nurses)                                      |  |
| A randomized trial of a consultation service to reduce falls in nursing homes                                                                                                                                                                                                         | Ray, W. A.; Taylor, J. A.; Meador, K. G.; Thapa, P. B.; Brown, A. K.; Kajihara, H. K.; Davis, C.; Gideon, P.; Griffin, M. R.                        | 1997 | JAMA                                                                                                           | 278 | 7          | 557-62                                          |                                          | #3975  | Exclusion reason: Wrong population (not nurses)                                      |  |
| A randomized trial of a program to reduce the use of psychoactive drugs in nursing homes                                                                                                                                                                                              | Avorn, J.; Soumerai, S. B.; Everitt, D. E.; Ross-Degnan, D.; Beers, M. H.; Sherman, D.; Salem-Schatz, S. R.; Fields, D.                             | 1992 | N Engl J Med                                                                                                   | 327 | 3          | 168-73                                          | 10.1056/nejm199207163270306              | #4390  | Exclusion reason: Wrong population (not nurses)                                      |  |
| A randomized trial of dementia care in nursing homes                                                                                                                                                                                                                                  | Rovner, B. W.; Steele, C. D.; Shmueli, Y.; Folstein, M. F.                                                                                          | 1996 | J Am Geriatr Soc                                                                                               | 44  | 1          | 13-Jul                                          |                                          | #4106  | Exclusion reason: Wrong population (not nurses)                                      |  |
| A randomized trial of work condition interventions in primary care: Effects on clinical outcomes                                                                                                                                                                                      | Linzer, M.; Poplau, S.; Brown, R.; Grossman, E.; Varkey, A. B.; Yale, S. H.; Williams, E.; Hicks, L.; Wallock, J.; Kohnhorst, D.; Barbouche, M.     | 2016 | Journal of General Internal Medicine                                                                           | 31  | 2 SUPPL. 1 | S106                                            |                                          | #14131 | Exclusion reason: Wrong type of paper (not a research article)                       |  |
| A reminder reduces urinary catheterization in hospitalized patients                                                                                                                                                                                                                   | Saint, S.; Kaufman, S. R.; Thompson, M.; Rogers, M. A. M.; Chenoweth, C. E.                                                                         | 2005 | Joint Commission Journal on                                                                                    | 31  | 8          | 455-462                                         |                                          | #429   | Exclusion reason: Wrong population (not nurses)                                      |  |

#### Additional file 4. Excluded articles at full text assessment stage and reasons for exclusion.

|                                                                                                                                                                                                         |                                                                                                                                                                                                                                              |      | Quality & Patient Safety                                        |     |                  |           |                                            |        |                                                                               |
|---------------------------------------------------------------------------------------------------------------------------------------------------------------------------------------------------------|----------------------------------------------------------------------------------------------------------------------------------------------------------------------------------------------------------------------------------------------|------|-----------------------------------------------------------------|-----|------------------|-----------|--------------------------------------------|--------|-------------------------------------------------------------------------------|
| A standardized nurse initiated protocol to improve management of severe hypertension in pregnancy                                                                                                       | Miller, M. J.; Butler, P.; Drake, E.; Taylor, A.; Lutgendorf, M. A.                                                                                                                                                                          | 2017 | Obstetrics and Gynecology                                       | 129 | Supplement 1     | 129S      |                                            | #11890 | Exclusion reason: Wrong type of paper (not a research article)                |
| A stepped wedge randomized controlled trial of a pragmatic, nurse-led intervention to support surrogate decision makers in ICUs                                                                         | White, D. B.; Angus, D. C.; Shields, A.; Pidro, C.; Paner, C.; Buddadhumaruk, P.; Chang, C. H.; Kahn, J. M.; Kowinsky, A.; Martin, S.; Arnold, R. M.                                                                                         | 2018 | American Journal of Respiratory and Critical Care Medicine      | 197 | MeetingAbstracts |           |                                            | #10971 | Exclusion reason: Wrong type of paper (not a research article)                |
| A strategy to promote research, evidence-based nursing care: Effects on childbirth outcomes                                                                                                             | Hodnett, Ellen D; Kaufman, Karyn; O'Brien, Pallas, Linda; Chipman, Mary; Watson, MacDonell, Jo; Hunsburger, Winifred                                                                                                                         | 1996 | Research in nursing & health                                    | 19  | 1                | 13-20     |                                            | #19711 | Exclusion reason: Wrong outcomes (not related to behaviour/clinical practice) |
| A structural multidisciplinary approach to depression management in nursing-home residents: a multicentre, stepped-wedge cluster-randomised trial                                                       | Leontjevas, R.; Gerritsen, D. L.; Smalbrugge, M.; Teerenstra, S.; Vernooij-Dassen, M. J.; Koopmans, R. T.                                                                                                                                    | 2013 | Lancet                                                          | 381 | 9885             | 2255-64   | 10.1016/s0140-6736(13)60590-5              | #17012 | Exclusion reason: Wrong population (not nurses)                               |
| A structured education programme increased hip protector use and may reduce hip fractures in nursing homes                                                                                              | Birks, Y.                                                                                                                                                                                                                                    | 2003 | Evidence Based Nursing                                          | 6   | 4                | 115-114   |                                            | #1774  | Exclusion reason: Wrong type of paper (not a research article)                |
| A structured training program for health workers in intravenous treatment with fluids and antibiotics in nursing homes: A modified stepped-wedge cluster-randomised trial to reduce hospital admissions | Romoren, M.; Gjelstad, S.; Lindbaek, M.                                                                                                                                                                                                      | 2017 | PLoS ONE                                                        | 12  | 9                | e0182619  | 10.1371/journal.pone.0182619               | #12507 | Exclusion reason: Wrong outcomes (not related to behaviour/clinical practice) |
| A tailored implementation strategy to reduce the duration of intravenous antibiotic treatment in community-acquired pneumonia: a controlled before-and-after study                                      | Engel, M. F.; Bruns, A. H. W.; Hulscher, Mejl; Gaillard, Cajm; Sankatsing, S. U. C.; van Berkhout, F. T.; Emmelot-Vonk, M. H.; Kuck, E. M.; Steeghs, M. H. M.; den Breeijen, J. H.; Stellato, R. K.; Hoepelman, A. I. M.; Oosterheert, J. J. | 2014 | European Journal of Clinical Microbiology & Infectious Diseases | 33  | 11               | 1897-1908 | 10.1007/s10096-014-2158-z                  | #15980 | Exclusion reason: Wrong population (not nurses)                               |
| A training intervention to improve information management in primary care                                                                                                                               | Schifferdecker, K. E.; Reed, V. A.; Homa, K.                                                                                                                                                                                                 | 2008 | Fam Med                                                         | 40  | 6                | 423-32    |                                            | #8739  | Exclusion reason: Wrong population (not nurses)                               |
| A Videotape-Based Training Method for Improving the Detection of Depression in Residents of Long-Term Care Facilities                                                                                   | Wood, Stacey; Cummings, Jeffrey L.; Schnelle, Betha; Stephens, Mary                                                                                                                                                                          |      | Gerontologist                                                   | 42  | 1                | 114-121   |                                            | #5304  | Exclusion reason: Wrong outcomes (not related to behaviour/clinical practice) |
| Academic detailing improves identification and reporting of adverse drug events                                                                                                                         | Schlienger, R. G.; Luscher, T. F.; Schoenenberger, R. A.; Haefeli, W. E.                                                                                                                                                                     | 1999 | Pharm World Sci                                                 | 21  | 3                | 110-5     |                                            | #3385  | Exclusion reason: Wrong population (not nurses)                               |
| Academic detailing to increase colorectal cancer screening by primary care practices in Appalachian Pennsylvania                                                                                        | Curry, W. J.; Lengerich, E. J.; Kluhsman, B. C.; Graybill, M. A.; Liao, J. Z.; Schaefer, E. W.; Spleen, A. M.; Dignan, M. B.                                                                                                                 | 2011 | BMC Health Services Research                                    | 11  |                  | 112       | http://dx.doi.org/10.1186/1472-6963-11-112 | #7353  | Exclusion reason: Wrong population (not nurses)                               |
| Accuracy and efficiency of computer-aided nursing diagnosis                                                                                                                                             | Kurashima, S.; Kobayashi, K.; Toyabe, S.; Akazawa, K.                                                                                                                                                                                        | 2008 | Int J Nurs Terminol Classif                                     | 19  | 3                | 95-101    | 10.1111/j.1744-618X.2008.00088.x           | #9013  | Exclusion reason: Wrong intervention (not an implementation intervention)     |

#### Additional file 4. Excluded articles at full text assessment stage and reasons for exclusion.

|                                                                                                                                                                                             |                                                                                                                                                                                       |      |                                                   |           |              |           |                                    |        |                                                                                      |
|---------------------------------------------------------------------------------------------------------------------------------------------------------------------------------------------|---------------------------------------------------------------------------------------------------------------------------------------------------------------------------------------|------|---------------------------------------------------|-----------|--------------|-----------|------------------------------------|--------|--------------------------------------------------------------------------------------|
| Adaptation of a best practice model for recognition and treatment of postpartum depression in a private obstetrics practice                                                                 | Long, Vicki Elizabeth                                                                                                                                                                 | 2010 |                                                   | 71        |              | 3597-3597 |                                    | #7218  | Exclusion reason: Wrong type of paper (not a research article)                       |
| Adoption and implementation of the original strict glycemic control guideline is feasible and safe in adult critically ill patients                                                         | Schultz, M. J.; Harmsen, R. E.; Korevaar, J. C.; Abu-Hanna, A.; Van Braam Houckgeest, F.; Van Der Sluijs, J. P.; Spronk, P. E.                                                        | 2012 | Minerva Anesthesiol                               | 78        | 9            | 982-95    |                                    | #17181 | Exclusion reason: Wrong outcomes (not related to behaviour/clinical practice)        |
| Advancing quality of urinary incontinence evaluation and treatment in nursing homes through translational research                                                                          | Watson, N. M.                                                                                                                                                                         | 2004 | Worldviews Evid Based Nurs                        | 1 Suppl 1 |              | S21-5     | 10.1111/j.1524-475X.2004.04043.x   | #1293  | Exclusion reason: Wrong type of paper (not a research article)                       |
| Agitation in nursing home residents with dementia (VIDEANT trial): effects of a cluster-randomized, controlled, guideline implementation trial                                              | Rapp, M. A.; Mell, T.; Majic, T.; Treusch, Y.; Nordheim, J.; Niemann-Mirmehdi, M.; Gutzmann, H.; Heinz, A.                                                                            | 2013 | J Am Med Dir Assoc                                | 14        | 9            | 690-5     | 10.1016/j.jamda.2013.05.017        | #16368 | Exclusion reason: Wrong outcomes (not related to behaviour/clinical practice)        |
| Ambulatory Voice Biofeedback: Relative Frequency and Summary Feedback Effects on Performance and Retention of Reduced Vocal Intensity in the Daily Lives of Participants With Normal Voices | Van Stan, J. H.; Mehta, D. D.; Sternad, D.; Petit, R.; Hillman, R. E.                                                                                                                 | 2017 | J Speech Lang Hear Res                            | 60        | 4            | 853-864   | 10.1044/2016_jslhr-s-16-0164       | #12331 | Exclusion reason: Wrong outcomes (not related to behaviour/clinical practice)        |
| An analysis of critical care staff's attitudes to donation in a country with presumed-consent legislation                                                                                   | Pelleriaux, B.; Roels, L.; Van Deynse, D.; Smits, J.; Cornu, O.; Delloye, C.                                                                                                          | 2008 | Progress in transplantation (Aliso Viejo, Calif.) | 18        | 3            | 173-178   |                                    | #8871  | Exclusion reason: Wrong study design (not a RCT or a nonrandomized controlled study) |
| An ED orientation/fellowship: an experiment in process-oriented training and learning to think like an emergency nurse                                                                      | Wolf, L.                                                                                                                                                                              | 2005 | J Emerg Nurs                                      | 31        | 3            | 298-301   | 10.1016/j.jen.2005.04.018          | #316   | Exclusion reason: Wrong study design (not a RCT or a nonrandomized controlled study) |
| An Educational and Administrative Intervention to Promote Rational Laboratory Test Ordering on an Academic General Medicine Service                                                         | Wertheim, B. M.; Aguirre, A. J.; Bhattacharyya, R. P.; Chorba, J.; Jadhav, A. P.; Kerry, V. B.; Macklin, E. A.; Motyckova, G.; Raju, S.; Lewandrowski, K.; Hunt, D. P.; Wright, D. E. | 2017 | Am J Med                                          | 130       | 1            | 47-53     | 10.1016/j.amjmed.2016.08.021       | #12295 | Exclusion reason: Wrong population (not nurses)                                      |
| An educational implementation of a cancer pain algorithm for ambulatory care                                                                                                                | Du Pen, A. R.; Du Pen, S.; Hansberry, J.; Miller-Kraybill, B.; Millen, J.; Everly, R.; Hansen, N.; Syrjala, K.                                                                        | 2000 | Pain Manag Nurs                                   | 1         | 4            | 116-28    | 10.1053/jpmn.2000.19333            | #2950  | Exclusion reason: Wrong population (not nurses)                                      |
| An educational intervention can prevent delirium on acute medical wards                                                                                                                     | Tabet, N.; Hudson, S.; Sweeney, V.; Sauer, J.; Bryant, C.; Macdonald, A.; Howard, R.                                                                                                  | 2005 | Age and Ageing                                    | 34        | 2            | 152-156   | 10.1093/ageing/af031               | #386   | Exclusion reason: Wrong population (not nurses)                                      |
| An educational intervention on drug use in nursing homes improves health outcomes resource utilization and reduces inappropriate drug prescription                                          | Garcia-Gollarte, F.; Baleriola-Julvez, J.; Ferrero-Lopez, I.; Cuenllas-Diaz, A.; Cruz-Jentoft, A. J.                                                                                  | 2014 | J Am Med Dir Assoc                                | 15        | 12           | 885-91    | 10.1016/j.jamda.2014.04.010        | #15938 | Exclusion reason: Wrong population (not nurses)                                      |
| An educational intervention to enhance nurse leaders' perceptions of patient safety culture                                                                                                 | Ginsburg, L.; Norton, P. G.; Casebeer, A.; Lewis, S.                                                                                                                                  | 2005 | Health Serv Res                                   | 40        | 4            | 997-1020  | 10.1111/j.1475-6773.2005.00401.x   | #1029  | Exclusion reason: Wrong outcomes (not related to behaviour/clinical practice)        |
| An educational intervention to reduce acute health care consumption in elderly patients with inappropriate drugs - A cluster randomised trial in primary care                               | Schmidt-Mende, K.; Andersen, M.; Wettermark, B.; Hasselstrom, J.                                                                                                                      | 2016 | Pharmacoepidemiology and Drug Safety              | 25        | Supplement 3 | 378-379   | http://dx.doi.org/10.1002/pds.4070 | #13794 | Exclusion reason: Wrong type of paper (not a research article)                       |

#### Additional file 4. Excluded articles at full text assessment stage and reasons for exclusion.

|                                                                                                                                                                           |                                                                                                                                         |      |                                                              |     |     |           |                                  |        |                                                                                      |
|---------------------------------------------------------------------------------------------------------------------------------------------------------------------------|-----------------------------------------------------------------------------------------------------------------------------------------|------|--------------------------------------------------------------|-----|-----|-----------|----------------------------------|--------|--------------------------------------------------------------------------------------|
| An efficiency evaluation of protocols for tight glycemic control in intensive care units                                                                                  | Malesker, M. A.; Foral, P. A.; McPhillips, A. C.; Christensen, K. J.; Chang, J. A.; Hilleman, D. E.                                     | 2007 | Am J Crit Care                                               | 16  | 6   | 589-98    |                                  | #9718  | Exclusion reason: Wrong study design (not a RCT or a nonrandomized controlled study) |
| An electronic hand hygiene surveillance device: a pilot study exploring surrogate markers for hand hygiene compliance                                                     | Sahud, A. G.; Bhanot, N.; Radhakrishnan, A.; Bajwa, R.; Manyam, H.; Post, J. C.                                                         | 2010 | Infect Control Hosp Epidemiol                                | 31  | 6   | 634-9     | 10.1086/652527                   | #7657  | Exclusion reason: Wrong population (not nurses)                                      |
| An enhanced role in comprehensive geriatric assessment for community-nurse case managers                                                                                  | Stolee, P.; Patterson, M. L.; Wiancko, D. C.; Esbaugh, J.; Arcese, Z. A.; Vinke, A. M.; Waddell, S.; Hatt, J.; Wells, K.; Crilly, R. G. | 2003 | Canadian Journal on Aging-Revue Canadienne Du Vieillessement | 22  | 2   | 177-184   | 10.1017/s0714980800004499        | #1905  | Exclusion reason: Wrong outcomes (not related to behaviour/clinical practice)        |
| An evaluation of a medication management training programme for community mental health professionals; service user level outcomes: a cluster randomised controlled trial | Harris, N.; Lovell, K.; Day, J.; Roberts, C.                                                                                            | 2009 | International Journal of Nursing Studies                     | 46  | 5   | 645-652   | 10.1016/j.ijnurstu.2008.10.010   | #8360  | Exclusion reason: Wrong population (not nurses)                                      |
| An evaluation of an educational programme to prepare family health nurses                                                                                                 | Macduff, C.; West, B. J.                                                                                                                | 2004 | Nurse Educ Today                                             | 24  | 7   | 575-83    | 10.1016/j.nedt.2004.08.001       | #1430  | Exclusion reason: Wrong study design (not a RCT or a nonrandomized controlled study) |
| An evaluation of educational outreach to improve evidence-based prescribing in Medicaid: a cautionary tale                                                                | Zillich, A. J.; Ackermann, R. T.; Stump, T. E.; Ambuehl, R. J.; Downs, S. M.; Holmes, A. M.; Katz, B.; Inui, T. S.                      | 2008 | J Eval Clin Pract                                            | 14  | 5   | 854-60    | 10.1111/j.1365-2753.2008.01035.x | #8642  | Exclusion reason: Wrong population (not nurses)                                      |
| An evaluation of practice nurses working with general practitioners to treat people with depression                                                                       | Mann, A. H.; Blizard, R.; Murray, J.; Smith, J. A.; Botega, N.; Macdonald, E.; Wilkinson, G.                                            | 1998 | British Journal of General Practice                          | 48  | 426 | 875-879   |                                  | #3709  | Exclusion reason: Wrong population (not nurses)                                      |
| An Evaluation of Staff Training in Positive Behavioural Support                                                                                                           | MacDonald, Anne; McGill, Peter; Murphy, Glynis                                                                                          |      | Journal of Applied Research in Intellectual Disabilities     | 31  | 6   | 1046-1061 |                                  | #5636  | Exclusion reason: Wrong population (not nurses)                                      |
| An evidence-based project to improve depression and alcohol use screening                                                                                                 | Valente, S.; Nemece, C.                                                                                                                 | 2006 | J Nurs Care Qual                                             | 21  | 1   | Aug-93    |                                  | #10018 | Exclusion reason: Wrong study design (not a RCT or a nonrandomized controlled study) |
| An innovative approach to educating nurses to clinical competence: A randomized controlled trial                                                                          | Lengetti, E.; Kronk, R.; Ulmer, K. W.; Wilf, K.; Murphy, D.; Rosanelli, M.; Taylor, A.                                                  | 2018 | Nurse Educ Pract                                             | 33  |     | 159-163   | 10.1016/j.nepr.2018.08.007       | #11179 | Exclusion reason: Wrong outcomes (not related to behaviour/clinical practice)        |
| An Integrated eDiagnosis Approach (IeDA) versus standard IMCI for assessing and managing childhood illness in Burkina Faso: a stepped-wedge cluster randomised trial      | Sarrasat, S.; Lewis, J. J.; Some, A. S.; Somda, S.; Cousens, S.; Blanchet, K.                                                           | 2021 | BMC Health Serv Res                                          | 21  | 1   | 354       | 10.1186/s12913-021-06317-3       | #21960 | Exclusion reason: Wrong population (not nurses)                                      |
| An intervention to improve antibiotic delivery and sputum procurement in patients hospitalized with community acquired pneumonia                                          | Lawrence, S. J.; Shadel, B. N.; Leet, T. L.; Hall, J. B.; Mundy, L. M.                                                                  | 2002 | CHEST                                                        | 122 | 3   | 913-919   | 10.1378/chest.122.3.913          | #2604  | Exclusion reason: Wrong population (not nurses)                                      |



#### Additional file 4. Excluded articles at full text assessment stage and reasons for exclusion.

|                                                                                                                                                                                         |                                                                                                                                                                                                   |      |                                                                                                                                                                                       |     |                |               |                                                                                                                 |        |                                                                                      |
|-----------------------------------------------------------------------------------------------------------------------------------------------------------------------------------------|---------------------------------------------------------------------------------------------------------------------------------------------------------------------------------------------------|------|---------------------------------------------------------------------------------------------------------------------------------------------------------------------------------------|-----|----------------|---------------|-----------------------------------------------------------------------------------------------------------------|--------|--------------------------------------------------------------------------------------|
| ANALYSIS of the EFFECT of HOMOGENEOUS MANAGEMENT on NURSES' DIATHESIS and QUALITY of NURSING                                                                                            | Si, Q.; Xia, H.; Liu, G.; Wan, F.; C. Hen H                                                                                                                                                       | 2022 | Acta Medica Mediterranea                                                                                                                                                              | 38  | 2              | 1377-1382     | <a href="https://dx.doi.org/10.19193/0393-6384_2022_2_209">https://dx.doi.org/10.19193/0393-6384_2022_2_209</a> | #22055 | Exclusion reason: Wrong study design (not a RCT or a nonrandomized controlled study) |
| Antibiotic use, hospital admissions, and mortality before and after implementing guidelines for nursing home-acquired pneumonia                                                         | Naughton, B. J.; Mylotte, J. M.; Ramadan, F.; Karuza, J.; Priore, R. L.                                                                                                                           | 2001 | J Am Geriatr Soc                                                                                                                                                                      | 49  | 8              | 1020-4        |                                                                                                                 | #2373  | Exclusion reason: Wrong population (not nurses)                                      |
| Antimicrobial stewardship in rural continuing care: Impact of interprofessional education and clinical decision tool implementation on urinary tract infection treatment                | Sadowski, C.; Pasay, D.; Slobodan, J.; Guirguis, M.; Bresee, L.                                                                                                                                   | 2017 | Canadian Pharmacists Journal                                                                                                                                                          | 150 | 4              | S8            | <a href="http://dx.doi.org/10.1177/1715163517719855">http://dx.doi.org/10.1177/1715163517719855</a>             | #12494 | Exclusion reason: Wrong type of paper (not a research article)                       |
| Application of a theory-based educational intervention to increase the frequency of performing oral health assessments on children among advanced practice registered nurses and nurses | Claiborne, Denise Michelle                                                                                                                                                                        | 2016 | Application of a Theory-Based Educational Intervention to Increase the Frequency of Performing Oral Health Assessments on Children Among Advanced Practice Registered Nurses & Nurses |     |                | 01-Jan        |                                                                                                                 | #14184 | Exclusion reason: Wrong type of paper (not a research article)                       |
| Application of clinical pathway management in the training and practice of nursing staff for cancer patients                                                                            | Zhou, J.; Ruan, J.; Liao, R.; Wu, X.                                                                                                                                                              | 2017 | Biomedical Research (India)                                                                                                                                                           | 28  | 17             | 7574-7577     |                                                                                                                 | #12729 | Exclusion reason: Wrong population (not nurses)                                      |
| Applying the RE-AIM framework to evaluate two implementation strategies used to introduce a tool for lifestyle intervention in Swedish primary health care                              | Carlford, S.; Andersson, A.; Bendtsen, P.; Nilsen, P.; Lindberg, M.                                                                                                                               | 2012 | Health Promot Int                                                                                                                                                                     | 27  | 2              | 167-76        | 10.1093/heapro/dar016                                                                                           | #6512  | Exclusion reason: Wrong population (not nurses)                                      |
| Appropriate outcome criteria to assess the efficiency of intervention aiming at improving acute stroke management                                                                       | Schott, A. M.; Haesebaert, J.; Mercier, C.; Cakmak, S.; Termoz, A.; Perreton, N.; Rabilloud, M.; Derex, L.; Detante, O.; Blanclasserre, K.; Marcel, S.; Rodier, G.; Philippeau, F.; Vallet, A. E. | 2017 | European Stroke Journal                                                                                                                                                               | 2   | 1 Supplement 1 | 159           | <a href="http://dx.doi.org/10.1177/2396987317705242">http://dx.doi.org/10.1177/2396987317705242</a>             | #12468 | Exclusion reason: Wrong type of paper (not a research article)                       |
| Assessing the impact of staff development on nursing practice                                                                                                                           | Brazil, K.; Jewell, A.; Lyle, C.; Zuraw, L.; Stanton, S.                                                                                                                                          | 1998 | J Nurses Staff Dev                                                                                                                                                                    | 14  | 4              | 198-204       |                                                                                                                 | #3772  | Exclusion reason: Wrong study design (not a RCT or a nonrandomized controlled study) |
| Association of the Resident Assessment Instrument (RAI) with changes in function, cognition, and psychosocial status                                                                    | Phillips, C. D.; Morris, J. N.; Hawes, C.; Fries, B. E.; Mor, V.; Nennstiel, M.; Iannacchione, V.                                                                                                 | 1997 | Journal of the American Geriatrics Society                                                                                                                                            | 45  | 8              | 986-993       | 10.1111/j.1532-5415.1997.tb02971.x                                                                              | #3982  | Exclusion reason: Wrong study design (not a RCT or a nonrandomized controlled study) |
| Audit and feedback and educational outreach did not differ from printed educational materials for improving community nursing practice                                                  | Hannon, R.                                                                                                                                                                                        | 2007 | Evidence Based Nursing                                                                                                                                                                | 10  | 1              | 26-26         |                                                                                                                 | #10154 | Exclusion reason: Wrong type of paper (not a research article)                       |
| Auditing the status of prioritization of nursing actions in the trauma emergency department                                                                                             | Malekifar, Esmaeil; Khalili, Robabe; Sadat Moayed, Malihe; Tayeb Moradian, Seyed; Mahmoudi, Hosein                                                                                                | 2022 | INTERNATIONAL EMERGENCY NURSING                                                                                                                                                       | 64  |                | N.PAG - N.PAG | 10.1016/j.ienj.2022.101215                                                                                      | #21298 | Exclusion reason: Wrong outcomes (not related to behaviour/clinical practice)        |
| Augmented Nurse Care Management in CKD Stages 4 to 5: A Randomized Trial                                                                                                                | Fishbane, S.; Agoritsas, S.; Bellucci, A.; Halinski, C.; Shah, H. H.; Sakhiya, V.; Balsam, L.                                                                                                     | 2017 | Am J Kidney Dis                                                                                                                                                                       | 70  | 4              | 498-505       | 10.1053/j.ajkd.2017.02.366                                                                                      | #12228 | Exclusion reason: Wrong population (not nurses)                                      |

#### Additional file 4. Excluded articles at full text assessment stage and reasons for exclusion.

|                                                                                                                                                                                            |                                                                                                                                                                                                                                                                                                                                      |      |                                                              |     |       |           |                                                      |        |                                                                                      |
|--------------------------------------------------------------------------------------------------------------------------------------------------------------------------------------------|--------------------------------------------------------------------------------------------------------------------------------------------------------------------------------------------------------------------------------------------------------------------------------------------------------------------------------------|------|--------------------------------------------------------------|-----|-------|-----------|------------------------------------------------------|--------|--------------------------------------------------------------------------------------|
| Automated standing orders to nurses increase influenza and pneumococcal vaccination rates among inpatients compared with reminders to physicians                                           | Dexter, PR                                                                                                                                                                                                                                                                                                                           | 2005 | Evidence, Å&sb<br>ased<br>Healthcare<br>and Public<br>Health | 9   | 3     | 211-2     |                                                      | #19714 | Exclusion reason: Wrong population (not nurses)                                      |
| Basic life support trained nurses ventilate more efficiently with laryngeal mask supreme than with facemask or laryngeal tube suction-disposable--a prospective, randomized clinical trial | Gruber, E.; Oberhammer, R.; Balkenhol, K.; Strapazzon, G.; Procter, E.; Brugger, H.; Falk, M.; Paal, P.                                                                                                                                                                                                                              | 2014 | Resuscitation                                                | 85  | 4     | 499-502   | 10.1016/j.resuscitation.2014.01.004                  | #15888 | Exclusion reason: Wrong intervention (not an implementation intervention)            |
| Basic life support-trained nurses ventilate more efficiently with laryngeal mask supreme than with facemask or disposable laryngeal tube suction: A prospective, randomized clinical trial | Gruber, E.; Oberhammer, R.; Balkenhol, K.; Strapazzon, G.; Procter, E.; Brugger, H.; Falk, M.; Paal, P.                                                                                                                                                                                                                              | 2014 | High Altitude Medicine and Biology                           | 15  | 2     | A284      | http://dx.doi.org/10.1089/ham.2014.1451              | #15887 | Exclusion reason: Wrong type of paper (not a research article)                       |
| Behavioural management in nursing and residential homes: a randomised controlled trial                                                                                                     | Proctor, R.; Burns, A.; Powell, H. S.; Tarrier, N.; Faragher, B.; Richardson, G.; Davies, L.; South, B.                                                                                                                                                                                                                              | 1999 | Lancet                                                       | 354 | 9172  | 26-Sep    | 10.1016/s0140-6736(98)08237-3                        | #3413  | Exclusion reason: Wrong outcomes (not related to behaviour/clinical practice)        |
| Bridging the gap in sexual healthcare in nursing practice: implementing a sexual healthcare training programme to improve outcomes                                                         | Sung, S. C.; Jiang, H. H.; Chen, R. R.; Chao, J. K.                                                                                                                                                                                                                                                                                  | 2016 | J Clin Nurs                                                  | 25  | 19-20 | 2989-3000 | 10.1111/jocn.13441                                   | #13275 | Exclusion reason: Wrong study design (not a RCT or a nonrandomized controlled study) |
| Building on existing tools to improve chronic disease prevention and screening in public health: a cluster randomized trial                                                                | Lofters, A. K.; O'Brien, M. A.; Sutradhar, R.; Pinto, A. D.; Baxter, N. N.; Donnelly, P.; Elliott, R.; Glazier, R. H.; Huizinga, J.; Kyle, R.; Manca, D.; Pietrusiak, M. A.; Rabeneck, L.; Riordan, B.; Selby, P.; Sivayoganathan, K.; Snider, C.; Sopcak, N.; Thorpe, K.; Tinmouth, J.; Wall, B.; Zuo, F.; Grunfeld, E.; Paszat, L. | 2021 | BMC Public Health                                            | 21  | 1     | 1496      | 10.1186/s12889-021-11452-x                           | #21235 | Exclusion reason: Wrong population (not nurses)                                      |
| Can a multifaceted educational intervention targeting both nurses and physicians change the prescribing of antibiotics to nursing home residents? A cluster randomized controlled trial    | Pettersson, E.; Vernby, A.; Molstad, S.; Lundborg, C. S.                                                                                                                                                                                                                                                                             | 2011 | J Antimicrob Chemother                                       | 66  | 11    | 2659-66   | 10.1093/jac/dkr312                                   | #6912  | Exclusion reason: Wrong population (not nurses)                                      |
| Can a workbook work? Examining whether a practitioner evaluation toolkit can promote instrumental use                                                                                      | Campbell, R.; Townsend, S. M.; Shaw, J.; Karim, N.; Markowitz, J.                                                                                                                                                                                                                                                                    | 2015 | Evaluation and Program Planning                              | 52  |       | 107-117   | http://dx.doi.org/10.1016/j.evalprogplan.2015.04.005 | #15584 | Exclusion reason: Wrong study design (not a RCT or a nonrandomized controlled study) |
| Can in-service education help prepare nurses for spiritual care?                                                                                                                           | Gerra, A.; Fitzpatrick, J. J.                                                                                                                                                                                                                                                                                                        | 2008 | J Christ Nurs                                                | 25  | 4     | 204-9     |                                                      | #9284  | Exclusion reason: Wrong study design (not a RCT or a nonrandomized controlled study) |
| Can just-in-time, evidence-based "reminders" improve pain management among home health care nurses and their patients?                                                                     | McDonald, M. V.; Pezzin, L. E.; Feldman, P. H.; Murtaugh, C. M.; Peng, T. R.                                                                                                                                                                                                                                                         | 2005 | J Pain Symptom Manage                                        | 29  | 5     | 474-88    | 10.1016/j.jpain-symman.2004.08.018                   | #557   | Exclusion reason: Wrong population (not nurses)                                      |
| Can multifaceted educational intervention improve clinical practice and patient outcomes regarding delirium in nursing homes?                                                              | Jeong, Eunhye; Chang, Sung Ok                                                                                                                                                                                                                                                                                                        | 2022 | JAPAN JOURNAL OF NURSING SCIENCE                             | 19  | 1     | 10-Jan    | 10.1111/jjns.12447                                   | #20853 | Exclusion reason: Wrong outcomes (not related to behaviour/clinical practice)        |

#### Additional file 4. Excluded articles at full text assessment stage and reasons for exclusion.

|                                                                                                                                                                            |                                                                                                                                               |      |                                                     |    |   |         |                               |        |                                                                                      |
|----------------------------------------------------------------------------------------------------------------------------------------------------------------------------|-----------------------------------------------------------------------------------------------------------------------------------------------|------|-----------------------------------------------------|----|---|---------|-------------------------------|--------|--------------------------------------------------------------------------------------|
| Can proactive rapid response team rounding improve surveillance and reduce unplanned escalations in care? A controlled before and after study                              | Danesh, V.; Neff, D.; Jones, T. L.; Aroian, K.; Unruh, L.; Andrews, D.; Guerrier, L.; Venus, S. J.; Jimenez, E.                               | 2019 | International Journal of Nursing Studies            | 91 |   | 128-133 |                               | #18996 | Exclusion reason: Wrong intervention (not an implementation intervention)            |
| Can the PROPER intervention reduce psychotropic drug prescription in nursing home residents with dementia? Results of a cluster-randomized controlled trial                | Smeets, C. H. W.; Smalbrugge, M.; Koopmans, Rtcn; Nelissen-Vrancken, Mhjm; van der Spek, K.; Teerenstra, S.; Gerritsen, D. L.; Zuidema, S. U. | 2021 | Int Psychogeriatr                                   | 33 | 6 | 577-586 | 10.1017/s1041610220000629     | #22079 | Exclusion reason: Wrong population (not nurses)                                      |
| Can training community mental health nurses to support family carers reduce behavioural problems in dementia? An exploratory pragmatic randomised controlled trial         | Moniz-Cook, E.; Elston, C.; Gardiner, E.; Agar, S.; Silver, M.; Win, T.; Wang, M.                                                             | 2008 | Int J Geriatr Psychiatry                            | 23 | 2 | 185-91  | 10.1002/gps.1860              | #8942  | Exclusion reason: Wrong intervention (not an implementation intervention)            |
| Can we propose the 4Ds along with the 6Cs for modern British nursing in the care of older patients? An evaluative study shows the effect training can have on nursing care | Sharma, J.; Tadros, G.                                                                                                                        | 2013 | Int J Geriatr Psychiatry                            | 28 | 9 | 988-9   | 10.1002/gps.3938              | #16298 | Exclusion reason: Wrong type of paper (not a research article)                       |
| Cardiopulmonary resuscitation feedback improves the quality of chest compression provided by hospital health care professionals                                            | Pozner, C. N.; Almozlino, A.; Elmer, J.; Poole, S.; McNamara, D.; Barash, D.                                                                  | 2011 | Am J Emerg Med                                      | 29 | 6 | 618-25  | 10.1016/j.ajem.2010.01.008    | #6352  | Exclusion reason: Wrong outcomes (not related to behaviour/clinical practice)        |
| Causal Attribution Training to Help Nurses Identify Causes of Medical Errors: A Randomized Controlled Trial                                                                | Er, Fatma; Ercf <sup>∞</sup> , Behice                                                                                                         | 2021 | Turkiye Klinikleri Journal of Nursing Sciences      | 13 | 4 | 926-936 | 10.5336/nurses.2021-82037     | #20403 | Exclusion reason: Wrong outcomes (not related to behaviour/clinical practice)        |
| Change in antihypertensive drug prescribing after guideline implementation: a controlled before and after study                                                            | Sipila, R.; Helin-Salmivaara, A.; Korhonen, M. J.; Ketola, E.                                                                                 | 2011 | BMC Family Practice                                 | 12 |   | 12      | 10.1186/1471-2296-12-87       | #6280  | Exclusion reason: Wrong population (not nurses)                                      |
| Changing caring behaviours in rehabilitation after a hip fracture - A tool for empowerment?                                                                                | Lindberg, L.; Ekstrom, W.; Hedstrom, M.; Flodin, L.; Lofgren, S.; Ryd, L.                                                                     | 2017 | Psychology Health & Medicine                        | 22 | 6 | 663-672 | 10.1080/13548506.2016.1211294 | #11978 | Exclusion reason: Wrong study design (not a RCT or a nonrandomized controlled study) |
| Changing nurses' pain assessment practice: a collaborative research utilization approach                                                                                   | Dufault, M. A.; Bielecki, C.; Collins, E.; Willey, C.                                                                                         | 1995 | J Adv Nurs                                          | 21 | 4 | 634-45  |                               | #4828  | Exclusion reason: Wrong population (not nurses)                                      |
| Changing preventive practice: a controlled trial on the effects of outreach visits to organise prevention of cardiovascular disease                                        | Hulscher, M. E.; van Drenth, B. B.; van der Wouden, J. C.; Mookink, H. G.; van Weel, C.; Grol, R. P.                                          | 1997 | Qual Health Care                                    | 6  | 1 | 19-24   |                               | #4040  | Exclusion reason: Wrong population (not nurses);                                     |
| Chart reminders increase referrals for inpatient smoking cessation intervention                                                                                            | McDaniel, A. M.; Kristeller, J. L.; Hudson, D. M.                                                                                             | 1999 | Nicotine Tob Res                                    | 1  | 2 | 175-80  |                               | #3843  | Exclusion reason: Wrong study design (not a RCT or a nonrandomized controlled study) |
| Classroom and simulation team training: a randomized controlled trial                                                                                                      | Clay-Williams, R.; McIntosh, C. A.; Kerridge, R.; Braithwaite, J.                                                                             | 2013 | Int J Qual Health Care                              | 25 | 3 | 314-21  | 10.1093/intqhc/mzt027         | #17315 | Exclusion reason: Wrong population (not nurses)                                      |
| Clinical Nurse Specialist-Led Implementation of an Early Discharge Protocol After Cardiac Surgery                                                                          | Chanyeong, Kwak; Young, Ko                                                                                                                    | 2019 | Clinical Nurse Specialist: The Journal for Advanced | 33 | 4 | 184-190 | 10.1097/NUR.0000000000000457  | #19666 | Exclusion reason: Wrong intervention (not an implementation intervention)            |

#### Additional file 4. Excluded articles at full text assessment stage and reasons for exclusion.

|                                                                                                                                                                                                    |                                                                                                                                                                         |      |                                                          |     |      |                |                              |        |                                                                                      |
|----------------------------------------------------------------------------------------------------------------------------------------------------------------------------------------------------|-------------------------------------------------------------------------------------------------------------------------------------------------------------------------|------|----------------------------------------------------------|-----|------|----------------|------------------------------|--------|--------------------------------------------------------------------------------------|
|                                                                                                                                                                                                    |                                                                                                                                                                         |      | Nursing Practice                                         |     |      |                |                              |        |                                                                                      |
| Clinical trial of a prevention and treatment protocol for skin breakdown in two nursing homes                                                                                                      | Hunter, S.; Anderson, J.; Hanson, D.; Thompson, P.; Langemo, D.; Klug, M. G.                                                                                            | 2003 | J Wound Ostomy Continence Nurs                           | 30  | 5    | 250-8          | 10.1067/mjw.2003.149         | #1650  | Exclusion reason: Wrong population (not nurses)                                      |
| Clinical Trial of an Educational Program to Decrease Monitor Alarms in a Medical Intensive Care Unit...Presented at the AACN National Teaching Institute in Houston, Texas, May 22-25, 2017        | McMurtry, James                                                                                                                                                         | 2017 | American Journal of Critical Care                        | 26  | 3    | e33-e33        | 10.4037/ajcc2017676          | #11911 | Exclusion reason: Wrong type of paper (not a research article)                       |
| Cluster randomised controlled trial of an infection control education and training intervention programme focusing on meticillin-resistant Staphylococcus aureus in nursing homes for older people | Baldwin, N. S.; Gilpin, D. F.; Tunney, M. M.; Kearney, M. P.; Crymble, L.; Cardwell, C.; Hughes, C. M.                                                                  | 2010 | J Hosp Infect                                            | 76  | 1    | 36-41          | 10.1016/j.jhin.2010.03.006   | #7854  | Exclusion reason: Wrong population (not nurses)                                      |
| Cluster randomized control trial of nursing home residents' oral hygiene following the Mouth Care Matters education program for certified nursing assistants                                       | Hartshorn, J. E.; Cowen, H. J.; Connick, C. L.                                                                                                                          | 2021 | Spec Care Dentist                                        | 41  | 3    | 372-380        | 10.1111/scd.12577            | #20658 | Exclusion reason: Wrong population (not nurses)                                      |
| Cluster randomized trial to evaluate the effect of a multimodal hand hygiene improvement strategy in primary care                                                                                  | Martin-Madrado, C.; Soto-Diaz, S.; Canada-Dorado, A.; Salinero-Fort, M. A.; Medina-Fernandez, M.; Carrillo de Santa Pau, E.; Gomez-Campelo, P.; Abanades-Herranz, J. C. | 2012 | Infect Control Hosp Epidemiol                            | 33  | 7    | 681-8          | 10.1086/666343               | #6213  | Exclusion reason: Wrong outcomes (not related to behaviour/clinical practice)        |
| Cluster-randomized controlled trial of dissemination strategies of an online quality improvement programme for alcohol-related disorders                                                           | Ruf, D.; Berner, M.; Kriston, L.; Lohmann, M.; Mundle, G.; Lorenz, G.; Niebling, W.; Harter, M.                                                                         | 2010 | Alcohol Alcohol                                          | 45  | 1    | Aug-70         | 10.1093/alcalc/agg079        | #7665  | Exclusion reason: Wrong population (not nurses)                                      |
| Clustered randomised trial of an intervention to improve the management of asthma: Greenwich asthma study                                                                                          | Premaratne, U. N.; Sterne, J. A. C.; Marks, G. B.; Webb, J. R.; Azima, H.; Burney, P. G. J.                                                                             | 1999 | BMJ: British Medical Journal (International Edition)     | 318 | 7193 | 1251-1255      | 10.1136/bmj.318.7193.1251    | #3414  | Exclusion reason: Wrong population (not nurses)                                      |
| Collaborative care for bipolar disorder: part I. Intervention and implementation in a randomized effectiveness trial                                                                               | Bauer, M. S.; McBride, L.; Williford, W. O.; Glick, H.; Kinosian, B.; Altshuler, L.; Beresford, T.; Kilbourne, A. M.; Sajatovic, M.                                     | 2006 | Psychiatr Serv                                           | 57  | 7    | 927-36         | 10.1176/ps.2006.57.7.927     | #245   | Exclusion reason: Wrong population (not nurses)                                      |
| Coming to grips with challenging behavior: a cluster randomized controlled trial on the effects of a multidisciplinary care program for challenging behavior in dementia                           | Zwijssen, S. A.; Smalbrugge, M.; Eefsting, J. A.; Twisk, J. W. R.; Gerritsen, D. L.; Pot, A. M.; Hertogh, Cmpm                                                          | 2014 | J Am Med Dir Assoc                                       | 15  | 7    | 531.e1-531.e10 | 10.1016/j.jamd.2014.04.007   | #15098 | Exclusion reason: Wrong population (not nurses)                                      |
| Communicating about Death and Dying: Developing Training for Staff Working in Services for People with Intellectual Disabilities                                                                   | Tuffrey-Wijne, Irene; Rose, Tracey; Grant, Robert; Wijne, Astrid                                                                                                        |      | Journal of Applied Research in Intellectual Disabilities | 30  | 6    | 1099-1110      |                              | #5555  | Exclusion reason: Wrong study design (not a RCT or a nonrandomized controlled study) |
| Comparative Safety, Efficiency, and Nursing Preference Among 3 Methods for Intravenous Push Medication Preparation:                                                                                | Burger, Maureen; Degnan, Dan                                                                                                                                            | 2019 | Journal of Patient Safety                                | 15  | 3    | 238-245        | 10.1097/PTS.0000000000000269 | #19118 | Exclusion reason: Wrong intervention (not an implementation intervention)            |

#### Additional file 4. Excluded articles at full text assessment stage and reasons for exclusion.

|                                                                                                                                                                                        |                                                                                                                                                                                                                                                                                                      |      |                                                                                                           |    |   |               |                                        |        |                                                                                      |  |
|----------------------------------------------------------------------------------------------------------------------------------------------------------------------------------------|------------------------------------------------------------------------------------------------------------------------------------------------------------------------------------------------------------------------------------------------------------------------------------------------------|------|-----------------------------------------------------------------------------------------------------------|----|---|---------------|----------------------------------------|--------|--------------------------------------------------------------------------------------|--|
| A Randomized Crossover Simulation Study                                                                                                                                                |                                                                                                                                                                                                                                                                                                      |      |                                                                                                           |    |   |               |                                        |        |                                                                                      |  |
| Comparing effects of two higher intensity feedback interventions with simple feedback on improving staff communication in nursing homes-the INFORM cluster-randomized controlled trial | Hoben, Matthias; Ginsburg, Liane R.; Easterbrook, Adam; Norton, Peter G.; Anderson, Ruth A.; Andersen, Elizabeth A.; Boström, Anne-Marie; Cranley, Lisa A.; Lanham, Holly J.; Weeks, Lori E.; Cummings, Greta G.; Holroyd-Leduc, Jayna M.; Squires, Janet E.; Wagg, Adrian S.; Estabrooks, Carole A. | 2020 | Implementation Science                                                                                    | 15 | 1 | N.PAG - N.PAG | 10.1186/s13012-020-01038-3             | #18061 | Exclusion reason: Wrong population (not nurses)                                      |  |
| Comparing the Effect of Lecture-Based and Clinical Training on Nurses' Knowledge and Skill in Caring for Patients with Angina Pectoris: A Clinical Trial                               | Yousefi, Reza; Farsi, Zahra; Rajai, Nahid                                                                                                                                                                                                                                                            | 2019 | Medical-Surgical Nursing Journal                                                                          | 8  | 3 | 07-Jan        | 10.5812/msnj.95895                     | #17436 | Exclusion reason: Wrong outcomes (not related to behaviour/clinical practice)        |  |
| Comparing the effectiveness of a blended learning approach with a conventional learning approach for basic emergency obstetric and newborn care training in Ethiopia                   | Yigzaw, Mulneh; Tebekaw, Yibeltal; Kim, Young-Mi; Kols, Adrienne; Ayalew, Firew; Eyassu, Gizachew                                                                                                                                                                                                    | 2019 | Midwifery                                                                                                 | 78 |   | 42-49         | 10.1016/j.midw.2019.07.014             | #17453 | Exclusion reason: Wrong outcomes (not related to behaviour/clinical practice)        |  |
| Comparison of Computer Based Instruction to Behavior Skills Training for Teaching Staff Implementation of Discrete-Trial Instruction with an Adult with Autism                         | Nosik, Melissa R.; Williams, W. Larry; Garrido, Natalia; Lee, Sarah                                                                                                                                                                                                                                  |      | Research in Developmental Disabilities: A Multidisciplinary Journal                                       | 34 | 1 | 461-468       |                                        | #5608  | Exclusion reason: Wrong population (not nurses)                                      |  |
| Comparison of the Efficacy of two Different Training Methods on the Surgical Safety Checklist: A Randomized Study                                                                      | Melike Tasci, Sena; Gezginci, Elif; Goktas, Sonay                                                                                                                                                                                                                                                    | 2020 | International Journal of Caring Sciences                                                                  | 13 | 1 | 53-60         |                                        | #18593 | Exclusion reason: Wrong outcomes (not related to behaviour/clinical practice)        |  |
| Compassionate care intervention for hospital nursing teams caring for older people: a pilot cluster randomised controlled trial                                                        | Gould, L. J.; Griffiths, P.; Barker, H. R.; Libberton, P.; Mesa-Eguiagaray, I.; Pickering, R. M.; Shipway, L. J.; Bridges, J.                                                                                                                                                                        | 2018 | BMJ Open                                                                                                  | 8  | 2 | e018563       | 10.1136/bmjopen-2017-018563            | #12009 | Exclusion reason: Wrong population (not nurses)                                      |  |
| Computer decision support software safely improves glycemic control in the burn intensive care unit: a randomized controlled clinical study                                            | Mann, Elizabeth A.; Jones, John A.; Wolf, Steven E.; Wade, Charles E.                                                                                                                                                                                                                                | 2011 | Journal of Burn Care & Research                                                                           | 32 | 2 | 246-255       | 10.1097/BCR.0b013e31820aaebf           | #7030  | Exclusion reason: Wrong outcomes (not related to behaviour/clinical practice)        |  |
| Computer Decision Support to Improve Autism Screening and Care in Community Pediatric Clinics                                                                                          | Bauer, Nerissa S.; Sturm, Lynne A.; Carroll, Aaron E.; Downs, Stephen M.                                                                                                                                                                                                                             |      | Infants and Young Children                                                                                | 26 | 4 | 306-317       |                                        | #5826  | Exclusion reason: Wrong study design (not a RCT or a nonrandomized controlled study) |  |
| Computer-assisted interventions to improve QTc documentation in patients receiving QT-prolonging drugs                                                                                 | Sandau, K. E.; Sendelbach, S.; Fletcher, L.; Frederickson, J.; Drew, B. J.; Funk, M.                                                                                                                                                                                                                 | 2015 | American journal of critical care : an official publication, American Association of Critical-Care Nurses | 24 | 2 | e6-e15        | http://dx.doi.org/10.4037/ajcc.2015240 | #14517 | Exclusion reason: Wrong study design (not a RCT or a nonrandomized controlled study) |  |

#### Additional file 4. Excluded articles at full text assessment stage and reasons for exclusion.

|                                                                                                                                                                                          |                                                                                                                                                                                         |      |                                                     |       |              |             |                                                                                                                   |        |                                                                                      |
|------------------------------------------------------------------------------------------------------------------------------------------------------------------------------------------|-----------------------------------------------------------------------------------------------------------------------------------------------------------------------------------------|------|-----------------------------------------------------|-------|--------------|-------------|-------------------------------------------------------------------------------------------------------------------|--------|--------------------------------------------------------------------------------------|
| Computer-assisted versus traditional classroom instruction to promote change in the nursing management of the second stage of labor                                                      | Nurse, Rachelle                                                                                                                                                                         | 2009 |                                                     | Ph.D. |              | 189 p-189 p |                                                                                                                   | #8098  | Exclusion reason: Wrong type of paper (not a research article)                       |
| CONNECT for better fall prevention in nursing homes: results from a pilot intervention study                                                                                             | Colon-Emeric, C. S.; McConnell, E.; Pinheiro, S. O.; Corazzini, K.; Porter, K.; Earp, K. M.; Landerman, L.; Beales, J.; Lipscomb, J.; Hancock, K.; Anderson, R. A.                      | 2013 | J Am Geriatr Soc                                    | 61    | 12           | Sep-50      | 10.1111/jgs.12550                                                                                                 | #17313 | Exclusion reason: Wrong population (not nurses)                                      |
| Constipation challenge: randomized controlled trial of interactive spaced education to improve primary care management of pediatric constipation                                         | Mallon, D.; Fei, L.; Farrell, M.; Iyer, S.; Klein, M.                                                                                                                                   | 2018 | Journal of Pediatric Gastroenterology and Nutrition | 67    | Supplement 1 | S13-S14     | <a href="http://dx.doi.org/10.1097/MPG.00000000000002164">http://dx.doi.org/10.1097/MPG.00000000000002164</a>     | #11128 | Exclusion reason: Wrong type of paper (not a research article)                       |
| Consultation training of nurses for cardiovascular prevention - a randomized study of 2 years duration                                                                                   | Drevenhorn, E.; Bengtson, A.; Nilsson, P. M.; Nyberg, P.; Kjellgren, K. I.                                                                                                              | 2012 | Blood Press                                         | 21    | 5            | 293-9       | 10.3109/08037051.2012.680734                                                                                      | #6868  | Exclusion reason: Wrong outcomes (not related to behaviour/clinical practice)        |
| Controlled trials of CQI and academic detailing to implement a clinical practice guideline for depression                                                                                | Brown, J. B.; Shye, D.; McFarland, B. H.; Nichols, G. A.; Mullooly, J. P.; Johnson, R. E.                                                                                               | 2000 | Jt Comm J Qual Improv                               | 26    | 1            | 39-54       |                                                                                                                   | #2996  | Exclusion reason: Wrong population (not nurses)                                      |
| Cosmos - Improving the Quality of Life in Nursing Home Patients: An Effectiveness-Implementation Cluster Randomized and Controlled Trial (cRCT)                                          | Husebo, B.                                                                                                                                                                              | 2021 | International Journal of Psychophysiology           | 168   | Supplement   | S33         | <a href="https://dx.doi.org/10.1016/j.ijpsycho.2021.07.099">https://dx.doi.org/10.1016/j.ijpsycho.2021.07.099</a> | #20787 | Exclusion reason: Wrong type of paper (not a research article)                       |
| Cost-effectiveness of educational outreach to primary care nurses to increase tuberculosis case detection and improve respiratory care: economic evaluation alongside a randomised trial | Fairall, L.; Bachmann, M. O.; Zwarenstein, M.; Bateman, E. D.; Niessen, L. W.; Lombard, C.; Majara, B.; English, R.; Bheekie, A.; van Rensburg, D.; Mayers, P.; Peters, A.; Chapman, R. | 2010 | Trop Med Int Health                                 | 15    | 3            | 277-86      | 10.1111/j.1365-3156.2009.02455.x                                                                                  | #7555  | Exclusion reason: Wrong study design (not a RCT or a nonrandomized controlled study) |
| Counselling on lifestyle factors in hypertension care after training on the stages of change model                                                                                       | Drevenhorn, E.; Bengtson, A.; Allen, J. K.; Saljo, R.; Kjellgren, K. I.                                                                                                                 | 2007 | Eur J Cardiovasc Nurs                               | 6     | 1            | 46-53       | 10.1016/j.ejcnurse.2006.03.007                                                                                    | #10242 | Exclusion reason: Wrong study design (not a RCT or a nonrandomized controlled study) |
| Cultural competency training and performance reports to improve diabetes care for black patients: a cluster randomized, controlled trial                                                 | Sequist, T. D.; Fitzmaurice, G. M.; Marshall, R.; Shaykevich, S.; Marston, A.; Safran, D. G.; Ayanian, J. Z.                                                                            | 2010 | Ann Intern Med                                      | 152   | 1            | Jun-40      | 10.7326/0003-4819-152-1-201001050-00009                                                                           | #7635  | Exclusion reason: Wrong population (not nurses)                                      |
| Decision support system in prehospital care: a randomized controlled simulation study                                                                                                    | Hagiwara, M. A.; Sjoqvist, B. A.; Lundberg, L.; Suserud, B. O.; Henricson, M.; Jonsson, A.                                                                                              | 2013 | Am J Emerg Med                                      | 31    | 1            | 145-53      | 10.1016/j.ajem.2012.06.030                                                                                        | #16760 | Exclusion reason: Wrong intervention (not an implementation intervention)            |
| Decision support tools improve clinicians' ability to interpret structured SMBG data                                                                                                     | Schnell, O.; Rodbard, H. W.; Unger, J.; Rees, C.; Parkin, C.; Jelsovsky, Z.; Amstutz, L.; Wegmann, N.; Schweitzer, M.; Wagner, R.                                                       | 2011 | Diabetologia                                        | 54    | SUPPL. 1     | S393        | <a href="http://dx.doi.org/10.1007/s00125-011-2276-4">http://dx.doi.org/10.1007/s00125-011-2276-4</a>             | #6305  | Exclusion reason: Wrong type of paper (not a research article)                       |
| Decreasing urinary tract infections through staff development, outcomes, and nursing process                                                                                             | Ribby, K. J.                                                                                                                                                                            | 2006 | J Nurs Care Qual                                    | 21    | 3            | 272-6       |                                                                                                                   | #10119 | Exclusion reason: Wrong type of paper (not a research article)                       |

#### Additional file 4. Excluded articles at full text assessment stage and reasons for exclusion.

|                                                                                                                                                                            |                                                                                                                                                                                                                                                            |      |                                            |     |    |           |                                                                                                               |        |                                                                                      |
|----------------------------------------------------------------------------------------------------------------------------------------------------------------------------|------------------------------------------------------------------------------------------------------------------------------------------------------------------------------------------------------------------------------------------------------------|------|--------------------------------------------|-----|----|-----------|---------------------------------------------------------------------------------------------------------------|--------|--------------------------------------------------------------------------------------|
| Delirium Care Bundle On Sedation And Orientation Among Icu-Acquired Delirium A Randomized Controlled Trial                                                                 | Theresa, S. J.; Fathima, L.; Kayalvizhi, E.; Puliken, M.                                                                                                                                                                                                   | 2022 | Journal of Pharmaceutical Negative Results | 13  |    | 1991-1999 | <a href="https://dx.doi.org/10.47750/pnr.2022.13.S04.243">https://dx.doi.org/10.47750/pnr.2022.13.S04.243</a> | #22227 | Exclusion reason: Wrong intervention (not an implementation intervention)            |
| Delirium knowledge and recognition: a randomized controlled trial of a web-based educational intervention for acute care nurses                                            | McCrow, J.; Sullivan, K. A.; Beattie, E. R.                                                                                                                                                                                                                | 2014 | Nurse Educ Today                           | 34  | 6  | 912-7     | 10.1016/j.nedt.2013.12.006                                                                                    | #15715 | Exclusion reason: Wrong outcomes (not related to behaviour/clinical practice)        |
| Delivery of home-based postpartum contraception in Southwest Trifinio, Guatemala: Reach, adoption, and implementation in a cluster-randomized trial                        | Harrison, M. S.; Jimenez-Zambrano, A.; Rivera, C.; Bunge-Montes, S.; Huebschmann, A. G.                                                                                                                                                                    | 2021 | Contraception                              | 104 | 4  | 406-413   | 10.1016/j.contraception.2021.07.003                                                                           | #20654 | Exclusion reason: Wrong outcomes (not related to behaviour/clinical practice)        |
| Dental auscultation for nursing personnel as a model of oral health care education: development, baseline, and 6-month follow-up assessments                               | Wardh, I.; Berggren, U.; Hallberg, L. R.; Andersson, L.; Sorensen, S.                                                                                                                                                                                      | 2002 | Acta Odontol Scand                         | 60  | 1  | 13-Sep    |                                                                                                               | #2032  | Exclusion reason: Wrong population (not nurses)                                      |
| Description and Impact of a Comprehensive Multispecialty Multidisciplinary Intervention to Decrease Opioid Prescribing in Surgery                                          | Kaafarani, H. M. A.; Eid, A. I.; Antonelli, D. M.; Chang, D. C.; Elsharkawy, A. E.; Elahad, J. A.; Lancaster, E. A.; Schulz, J. T.; Melnitchouk, S. I.; Kastrinakis, W. V.; Hutter, M. M.; Masiakos, P. T.; Colwell, A. S.; Wright, C. D.; Lillemoe, K. D. | 2019 | Annals of Surgery                          | 270 | 3  | 452-462   | 10.1097/sla.00000000000003462                                                                                 | #18793 | Exclusion reason: Wrong study design (not a RCT or a nonrandomized controlled study) |
| Designing and evaluating an interactive multimedia Web-based simulation for developing nurses' competencies in acute nursing care: randomized controlled trial             | Liaw, S. Y.; Wong, L. F.; Chan, S. W.; Ho, J. T.; Mordiffi, S. Z.; Ang, S. B.; Goh, P. S.; Ang, E. N.                                                                                                                                                      | 2015 | J Med Internet Res                         | 17  | 1  | e5        | 10.2196/jmir.3853                                                                                             | #15209 | Exclusion reason: Wrong outcomes (not related to behaviour/clinical practice)        |
| Developing, Implementing, and Evaluating a Nurse-Driven Rapid Reversal Protocol for Patients With Traumatic Intracerebral Hemorrhage in the Presence of Preinjury Warfarin | Blackmore, A. R.; Caputo, L. M.; Bourg, P. W.; Mains, C. W.                                                                                                                                                                                                | 2016 | Journal of Trauma Nursing                  | 23  | 3  | 138-143   | 10.1097/jtn.0000000000000201                                                                                  | #14687 | Exclusion reason: Wrong study design (not a RCT or a nonrandomized controlled study) |
| Development and evaluation of a nurse-led hypertension management model: A randomized controlled trial                                                                     | Zhu, X.; Wong, F. K. Y.; Wu, C. L. H.                                                                                                                                                                                                                      | 2018 | Int J Nurs Stud                            | 77  |    | 171-178   | 10.1016/j.ijnur.2017.10.006                                                                                   | #22607 | Exclusion reason: Wrong outcomes (not related to behaviour/clinical practice)        |
| Development and Evaluation of a Quick Response Code,ÄiBased Nursing Education Program for Operating and Recovery Room Nurses                                               | Park, Eun Woo; Lee, Hanna; Yun, Eun Kyoung                                                                                                                                                                                                                 | 2019 | CIN: Computers, Informatics, Nursing       | 37  | 11 | 599-605   | 10.1097/CIN.0000000000000550                                                                                  | #18002 | Exclusion reason: Wrong study design (not a RCT or a nonrandomized controlled study) |
| Development and Evaluation of a Web-based Learning Course for Clinical Nurses: Anticancer Chemotherapy and Nursing                                                         | Mi Yeong, Mun; Seon Young, Hwang                                                                                                                                                                                                                           | 2020 | Korean Journal of Adult Nursing            | 32  | 4  | 364-373   | 10.7475/kjan.2020.32.4.364                                                                                    | #18585 | Exclusion reason: Wrong outcomes (not related to behaviour/clinical practice)        |
| Development and evaluation of an education program for professional palliative care nursing                                                                                | Yeun, Y. R.; Kwon, M.; Lee, K. S.                                                                                                                                                                                                                          | 2015 | J Korean Acad Nurs                         | 45  | 1  | 139-46    | 10.4040/jkan.2015.45.1.139                                                                                    | #14283 | Exclusion reason: Wrong outcomes (not related to behaviour/clinical practice)        |
| Development of an Enhanced Recovery After Surgery Guideline and                                                                                                            | McLeod, R. S.; Aarts, M. A.; Chung, F.; Eskicioglu, C.; Forbes, S. S.; Conn, L. G.; McCluskey, S.; McKenzie, M.;                                                                                                                                           | 2015 | Annals of Surgery                          | 262 | 6  | 1016-1025 | 10.1097/sla.0000000000000067                                                                                  | #14800 | Exclusion reason: Wrong study design (not a RCT)                                     |

#### Additional file 4. Excluded articles at full text assessment stage and reasons for exclusion.

|                                                                                                                                                                |                                                                                                                                                                                      |      |                                                             |     |    |           |                                                |        |                                                                                      |
|----------------------------------------------------------------------------------------------------------------------------------------------------------------|--------------------------------------------------------------------------------------------------------------------------------------------------------------------------------------|------|-------------------------------------------------------------|-----|----|-----------|------------------------------------------------|--------|--------------------------------------------------------------------------------------|
| Implementation Strategy Based on the Knowledge-to-action Cycle                                                                                                 | Morningstar, B.; Nadler, A.; Okraïneç, A.; Pearsall, E. A.; Sawyer, J.; Siddique, N.; Wood, T.                                                                                       |      |                                                             |     |    |           |                                                |        | or a nonrandomized controlled study)                                                 |
| Development, implementation and evaluation of a disaster training programme for nurses: a Switching Replications randomized controlled trial                   | Pesiridis, T.; Sourtzi, P.; Galanis, P.; Kalokairinou, A.                                                                                                                            | 2015 | Nurse Educ Pract                                            | 15  | 1  | Jul-63    | 10.1016/j.nepr.2014.02.001                     | #14585 | Exclusion reason: Wrong outcomes (not related to behaviour/clinical practice)        |
| Differentiated practice, patient-oriented care and quality of work in a hospital in the Netherlands                                                            | Boumans, N. P.; Landeweerd, J. A.; Visser, M.                                                                                                                                        | 2004 | Scand J Caring Sci                                          | 18  | 1  | 37-48     |                                                | #1108  | Exclusion reason: Wrong intervention (not an implementation intervention)            |
| Dissemination of Evidence-Based Antipsychotic Prescribing Guidelines to Nursing Homes: A Cluster Randomized Trial                                              | Tjia, J.; Field, T.; Mazor, K.; Lemay, C. A.; Kanaan, A. O.; Donovan, J. L.; Briesacher, B. A.; Peterson, D.; Pandolfi, M.; Spenard, A.; Gurwitz, J. H.                              | 2015 | J Am Geriatr Soc                                            | 63  | 7  | 1289-98   | 10.1111/jgs.13488                              | #14436 | Exclusion reason: Wrong outcomes (not related to behaviour/clinical practice)        |
| Distance-Learning, ADHD Quality Improvement in Primary Care: A Cluster-Randomized Trial                                                                        | Fiks, A. G.; Mayne, S. L.; Michel, J. J.; Miller, J.; Abraham, M.; Suh, A.; Jawad, A. F.; Guevara, J. P.; Grundmeier, R. W.; Blum, N. J.; Power, T. J.                               | 2017 | J Dev Behav Pediatr                                         | 38  | 8  | 573-583   | 10.1097/dbp.0000000000000490                   | #12229 | Exclusion reason: Wrong population (not nurses)                                      |
| Documentation of chemotherapy administration by nursing staff in inpatient and outpatient oncology/hematology settings: a best practice implementation project | Turner, Allison; Stephenson, Matthew                                                                                                                                                 | 2015 | JBÍ Database of Systematic Reviews & Implementation Reports | 13  | 10 | 316-334   | 10.11124/jbisri-r-2015-2157                    | #14422 | Exclusion reason: Wrong study design (not a RCT or a nonrandomized controlled study) |
| Does an electronic cognitive aid have an effect on the management of severe gynaecological TURP syndrome? A prospective, randomised simulation study           | St Pierre, M.; Breuer, G.; Strembski, D.; Schmitt, C.; Luetcke, B.                                                                                                                   | 2017 | BMC Anesthesiol                                             | 17  | 1  | 72        | 10.1186/s12871-017-0365-8                      | #12418 | Exclusion reason: Wrong population (not nurses)                                      |
| Does training increase the use of more emotionally laden words by nurses when talking with cancer patients? A randomised study                                 | Razavi, D.; Delvaux, N.; Marchal, S.; Durieux, J. F.; Farvacques, C.; Dubus, L.; Hogenraad, R.                                                                                       | 2002 | Br J Cancer                                                 | 87  | 1  | 07-Jan    | 10.1038/sj.bjc.6600412                         | #2121  | Exclusion reason: Wrong outcomes (not related to behaviour/clinical practice)        |
| Drug Safety for Nursing-Home Residents-Findings of a Pragmatic, Cluster-Randomized, Controlled Intervention Trial in 44 Nursing Homes                          | Junius-Walker, U.; Krause, O.; Thörmann, P.; Bernhard, S.; Fuchs, A.; Sparenberg, L.; Wollny, A.; Stolz, R.; Haumann, H.; Freytag, A.; Kirsch, C.; Usacheva, S.; Wilm, S.; Wiese, B. | 2021 | Dtsch Arztebl Int                                           | 118 | 42 | 705-712   | 10.3238/arztebl.m2021.0297                     | #20904 | Exclusion reason: Wrong population (not nurses)                                      |
| Durable improvements in prostate cancer screening from online spaced education: A randomized controlled trial                                                  | Kerfoot, B. P.; Lawler, E. V.; Sokolovskaya, G.; Gagnon, D.; Conlin, P. R.                                                                                                           | 2010 | American Journal of Preventive Medicine                     | 39  | 5  | 472-478   | http://dx.doi.org/10.1016/j.amepre.2010.07.016 | #7416  | Exclusion reason: Wrong population (not nurses)                                      |
| E-learning education program for registered nurses: the experience of a teaching medical center                                                                | Sheen, S. T. H.; Chang, W. Y.; Chen, H. L.; Chao, H. L.; Tseng, C. P.                                                                                                                | 2008 | Journal of Nursing Research                                 | 16  | 3  | 195-201   | 10.1097/01.JN.R.0000387306.34741.70            | #17363 | Exclusion reason: Wrong outcomes (not related to behaviour/clinical practice)        |
| E-learning: a comparative study for knowledge apprehension among nurses                                                                                        | Padalino, Y.; Peres, H. H.                                                                                                                                                           | 2007 | Rev Lat Am Enfermagem                                       | 15  | 3  | 397-403   |                                                | #9633  | Exclusion reason: Wrong outcomes (not related to behaviour/clinical practice)        |
| Economic Evaluation of a Reablement Training Program for Homecare Staff Targeting Sedentary Behavior in                                                        | Rooijackers, T. H.; Metzelthin, S. F.; van Rossum, E.; Kempen, Gijm; Evers, Smaa; Gabrio, A.; Zijlstra, G. A. R.                                                                     | 2021 | Clin Interv Aging                                           | 16  |    | 2095-2109 | 10.2147/cia.S341221                            | #21885 | Exclusion reason: Wrong population (not nurses)                                      |



#### Additional file 4. Excluded articles at full text assessment stage and reasons for exclusion.

|                                                                                                                                                                                                                                      |                                                                                                                                                                                                     |      |                                            |    |            |           |                                             |        |                                                                               |
|--------------------------------------------------------------------------------------------------------------------------------------------------------------------------------------------------------------------------------------|-----------------------------------------------------------------------------------------------------------------------------------------------------------------------------------------------------|------|--------------------------------------------|----|------------|-----------|---------------------------------------------|--------|-------------------------------------------------------------------------------|
| Community-Dwelling Older Adults Compared to Usual Care: A Cluster Randomized Controlled Trial                                                                                                                                        |                                                                                                                                                                                                     |      |                                            |    |            |           |                                             |        |                                                                               |
| Educating Nursing Home Nurses on Efficient Use of the Emergency Department                                                                                                                                                           | Mercer, S.; Robinson, S.                                                                                                                                                                            | 2008 | Journal of Emergency Nursing               | 34 | 1          | 74-76     | http://dx.doi.org/10.1016/j.jen.2007.05.002 | #9314  | Exclusion reason: Wrong type of paper (not a research article)                |
| Educating nursing home staff on fracture prevention: a cluster randomised trial                                                                                                                                                      | Cox, H.; Puffer, S.; Morton, V.; Cooper, C.; Hodson, J.; Masud, T.; Oliver, D.; Preedy, D.; Selby, P.; Stone, M.; Sutcliffe, A.; Torgerson, D.                                                      | 2008 | Age Ageing                                 | 37 | 2          | 167-72    | 10.1093/agein/g/afm168                      | #9243  | Exclusion reason: Wrong population (not nurses)                               |
| Education for ward nurses influences on the quality of inpatient's bowel preparation for colonoscopy                                                                                                                                 | Cho, K. B.; Kim, E. S.; Park, K. S.; Choi, E. S.; Lee, S. M.; Yang, C. H.                                                                                                                           | 2014 | United European Gastroenterology Journal   | 2  | 1 SUPPL. 1 | A334-A335 | http://dx.doi.org/10.1177/2050640614548980  | #16459 | Exclusion reason: Wrong type of paper (not a research article)                |
| Education to reduce potentially harmful medication use among residents of assisted living facilities: a randomized controlled trial                                                                                                  | Pitkala, K. H.; Juola, A. L.; Kautiainen, H.; Soini, H.; Finne-Soveri, U. H.; Bell, J. S.; Bjorkman, M.                                                                                             | 2014 | J Am Med Dir Assoc                         | 15 | 12         | 892-8     | 10.1016/j.jamda.2014.04.002                 | #15381 | Exclusion reason: Wrong outcomes (not related to behaviour/clinical practice) |
| Educational Intervention Improves Communication Abilities of Nurses Encountering Workplace Incivility                                                                                                                                | Howard, Matthew S.; Embree, Jennifer L.                                                                                                                                                             | 2020 | Journal of Continuing Education in Nursing | 51 | 3          | 138-144   | 10.3928/0022-0124-20200216-09               | #18039 | Exclusion reason: Wrong outcomes (not related to behaviour/clinical practice) |
| Educational intervention on medication reviews aiming to reduce acute healthcare consumption in elderly patients with potentially inappropriate medicines-A pragmatic open-label cluster-randomized controlled trial in primary care | Schmidt-Mende, K.; Andersen, M.; Wettermark, B.; Hasselstrom, J.                                                                                                                                    | 2017 | Pharmacoepidemiol Drug Saf                 | 26 | 11         | 1347-1356 | 10.1002/pds.4263                            | #12471 | Exclusion reason: Wrong population (not nurses)                               |
| Educational outreach in diabetes to encourage practice nurses to use primary care hypertension and hyperlipidaemia guidelines (EDEN): a randomized controlled trial                                                                  | New, J. P.; Mason, J. M.; Freemantle, N.; Teasdale, S.; Wong, L.; Bruce, N. J.; Burns, J. A.; Gibson, J. M.                                                                                         | 2004 | Diabet Med                                 | 21 | 6          | 599-603   | 10.1111/j.1464-5491.2004.01213.x            | #2281  | Exclusion reason: Wrong population (not nurses)                               |
| Educational outreach visits to primary care nurses improved tuberculosis detection and treatment of obstructive lung disease                                                                                                         | Carrier, J.                                                                                                                                                                                         | 2006 | Evidence Based Nursing                     | 9  | 2          | 58-58     |                                             | #489   | Exclusion reason: Wrong type of paper (not a research article)                |
| Educational Outreach with an Integrated Clinical Tool for Nurse-Led Non-communicable Chronic Disease Management in Primary Care in South Africa: A Pragmatic Cluster Randomised Controlled Trial                                     | Fairall, L. R.; Folb, N.; Timmerman, V.; Lombard, C.; Steyn, K.; Bachmann, M. O.; Bateman, E. D.; Lund, C.; Cornick, R.; Faris, G.; Gaziano, T.; Georgeu-Pepper, D.; Zwarenstein, M.; Levitt, N. S. | 2016 | PLoS Med                                   | 13 | 11         | e1002178  | 10.1371/journal.pmed.1002178                | #14014 | Exclusion reason: Wrong outcomes (not related to behaviour/clinical practice) |
| Educational program for nursing home physicians and staff to reduce use of non-steroidal anti-inflammatory drugs among nursing home residents: a randomized controlled trial                                                         | Stein, C. M.; Griffin, M. R.; Taylor, J. A.; Pichert, J. W.; Brandt, K. D.; Ray, W. A.                                                                                                              | 2001 | Med Care                                   | 39 | 5          | 436-45    |                                             | #2178  | Exclusion reason: Wrong outcomes (not related to behaviour/clinical practice) |
| Effect of a facility-based multifaceted intervention on the quality of obstetrical care: a cluster randomized controlled trial in Mali and Senegal                                                                                   | Pirkle, Catherine M.; Dumont, Alexandre; Traoré, Mamadou; Zunzunegui, Maria-Victoria                                                                                                                | 2013 | BMC Pregnancy & Childbirth                 | 13 | 1          | 24-24     | 10.1186/1471-2393-13-24                     | #16388 | Exclusion reason: Wrong population (not nurses)                               |

#### Additional file 4. Excluded articles at full text assessment stage and reasons for exclusion.

|                                                                                                                                                                                          |                                                                                                                                                                                                                                           |      |                                      |     |      |           |                               |        |                                                                                      |
|------------------------------------------------------------------------------------------------------------------------------------------------------------------------------------------|-------------------------------------------------------------------------------------------------------------------------------------------------------------------------------------------------------------------------------------------|------|--------------------------------------|-----|------|-----------|-------------------------------|--------|--------------------------------------------------------------------------------------|
| Effect of a guideline-based multicomponent intervention on use of physical restraints in nursing homes: a randomized controlled trial                                                    | Kopke, S.; Muhlhauser, I.; Gerlach, A.; Haut, A.; Haastert, B.; Mohler, R.; Meyer, G.                                                                                                                                                     | 2012 | JAMA                                 | 307 | 20   | 2177-84   | 10.1001/jama.2012.4517        | #5934  | Exclusion reason: Wrong population (not nurses)                                      |
| Effect of a model consultation informed by guidelines on recorded quality of care of osteoarthritis (MOSAICS): a cluster randomised controlled trial in primary care                     | Jordan, K. P.; Edwards, J. J.; Porcheret, M.; Healey, E. L.; Jinks, C.; Bedson, J.; Clarkson, K.; Hay, E. M.; Dziedzic, K. S.                                                                                                             | 2017 | Osteoarthritis Cartilage             | 25  | 10   | 1588-1597 | 10.1016/j.joca.2017.05.017    | #12982 | Exclusion reason: Wrong outcomes (not related to behaviour/clinical practice)        |
| Effect of a multifaceted intervention on number of antimicrobial prescriptions for suspected urinary tract infections in residents of nursing homes: cluster randomised controlled trial | Loeb, M.; Brazil, K.; Lohfeld, L.; McGeer, A.; Simor, A.; Stevenson, K.; Zoutman, D.; Smith, S.; Liu, X.; Walter, S. D.                                                                                                                   | 2005 | BMJ                                  | 331 | 7518 | 669       | 10.1136/bmj.38602.586343.55   | #579   | Exclusion reason: Wrong population (not nurses)                                      |
| Effect of a Simulation-based Education on Cardio-pulmonary Emergency Care Knowledge, Clinical Performance Ability and Problem Solving Process in New Nurses                              | Kim Yun, Hee; Jang Keum, Seong                                                                                                                                                                                                            | 2011 | Journal of Korean Academy of Nursing | 41  | 2    | 245-255   | 10.4040/jkan.2011.41.2.245    | #6448  | Exclusion reason: Wrong language (not English or French)                             |
| Effect of an education program on decreasing catheter-related bloodstream infections in the surgical intensive care unit                                                                 | Coopersmith, C. M.; Rebmann, T. L.; Zack, J. E.; Ward, M. R.; Corcoran, R. M.; Schallom, M. E.; Sona, C. S.; Buchman, T. G.; Boyle, W. A.; Polish, L. B.; Fraser, V. J.                                                                   | 2002 | Critical Care Medicine               | 30  | 1    | 59-64     |                               | #17374 | Exclusion reason: Wrong study design (not a RCT or a nonrandomized controlled study) |
| Effect of an educational intervention for telephone triage nurses on out-of-hours attendance: a pragmatic randomized controlled study                                                    | Lindberg, B. H.; Rebnord, I. K.; Hvilby, S.                                                                                                                                                                                               | 2023 | BMC Health Serv Res                  | 23  | 1    | 4         | 10.1186/s12913-022-08994-0    | #21193 | Exclusion reason: Wrong population (not nurses)                                      |
| Effect of an electronic medication reconciliation application and process redesign on potential adverse drug events: a cluster-randomized trial                                          | Schnipper, J. L.; Hamann, C.; Ndumele, C. D.; Liang, C. L.; Carty, M. G.; Karson, A. S.; Bhan, I.; Coley, C. M.; Poon, E.; Turchin, A.; Labonville, S. A.; Diedrichsen, E. K.; Lipsitz, S.; Broverman, C. A.; McCarthy, P.; Gandhi, T. K. | 2009 | Arch Intern Med                      | 169 | 8    | 771-80    | 10.1001/archinternmed.2009.51 | #7996  | Exclusion reason: Wrong population (not nurses)                                      |
| Effect of clinician communication skills training on patient satisfaction. A randomized, controlled trial                                                                                | Brown, J. B.; Boles, M.; Mullooly, J. P.; Levinson, W.                                                                                                                                                                                    | 1999 | Ann Intern Med                       | 131 | 11   | 822-9     |                               | #3481  | Exclusion reason: Wrong population (not nurses)                                      |
| Effect of communication skills training on nurses' detection of patients' distress and related factors after cancer diagnosis: a randomized study                                        | Fukui, S.; Ogawa, K.; Ohtsuka, M.; Fukui, N.                                                                                                                                                                                              | 2009 | Psychooncology                       | 18  | 11   | 1156-64   | 10.1002/pon.1429              | #8407  | Exclusion reason: Wrong outcomes (not related to behaviour/clinical practice)        |
| Effect of computerised evidence based guidelines on management of asthma and angina in adults in primary care: cluster randomised controlled trial                                       | Eccles, M.; McColl, E.; Steen, N.; Rousseau, N.; Grimshaw, J.; Parkin, D.; Purves, I.                                                                                                                                                     | 2002 | BMJ                                  | 325 | 7370 | 941       |                               | #2636  | Exclusion reason: Wrong population (not nurses)                                      |
| Effect of e-learning and repeated performance feedback on spirometry test quality in family practice: a cluster trial                                                                    | Schermer, T. R.; Akkermans, R. P.; Crockett, A. J.; van Montfort, M.; Grootens-Stekelenburg, J.; Stout, J. W.; Pieters, W.                                                                                                                | 2011 | Ann Fam Med                          | 9   | 4    | 330-6     | 10.1370/afm.1258              | #6308  | Exclusion reason: Wrong outcomes (not related to behaviour/clinical practice)        |
| Effect of e-learning program on risk assessment and pressure ulcer classification - A randomized study                                                                                   | Bredesen, I. M.; Bjoro, K.; Gunningberg, L.; Hofoss, D.                                                                                                                                                                                   | 2016 | Nurse Educ Today                     | 40  |      | 191-7     | 10.1016/j.nedt.2016.03.008    | #14663 | Exclusion reason: Wrong outcomes (not related to)                                    |

#### Additional file 4. Excluded articles at full text assessment stage and reasons for exclusion.

|                                                                                                                                                                             |                                                                                                                                                                                                  |      |                                      |     |      |           |                                               |        |                                                                                      |
|-----------------------------------------------------------------------------------------------------------------------------------------------------------------------------|--------------------------------------------------------------------------------------------------------------------------------------------------------------------------------------------------|------|--------------------------------------|-----|------|-----------|-----------------------------------------------|--------|--------------------------------------------------------------------------------------|
|                                                                                                                                                                             |                                                                                                                                                                                                  |      |                                      |     |      |           |                                               |        | behaviour/clinical practice)                                                         |
| Effect of enhanced psychosocial care on antipsychotic use in nursing home residents with severe dementia: cluster randomised trial                                          | Fossey, J.; Ballard, C.; Juszcak, E.; James, I.; Alder, N.; Jacoby, R.; Howard, R.                                                                                                               | 2006 | BMJ                                  | 332 | 7544 | 756-61    | 10.1136/bmj.38782.575868.7C                   | #61    | Exclusion reason: Wrong population (not nurses)                                      |
| Effect of implementation of Integrated Management of Neonatal and Childhood Illness (IMNCI) programme on neonatal and infant mortality: cluster randomised controlled trial | Bhandari, N.; Mazumder, S.; Taneja, S.; Sommerfelt, H.; Strand, T. A.                                                                                                                            | 2012 | BMJ                                  | 344 |      | e1634     | 10.1136/bmj.e1634                             | #6550  | Exclusion reason: Wrong population (not nurses)                                      |
| Effect of Increased Interprofessional Familiarity on Team Performance, Communication, and Psychological Safety on Inpatient Medical Teams: A Randomized Clinical Trial      | Iyasere, C. A.; Wing, J.; Martel, J. N.; Healy, M. G.; Park, Y. S.; Finn, K. M.                                                                                                                  | 2022 | JAMA Intern Med                      | 182 | 11   | 1190-1198 | 10.1001/jamainternmed.2022.4373               | #20820 | Exclusion reason: Wrong intervention (not an implementation intervention)            |
| Effect of monitoring surgical outcomes using control charts to reduce major adverse events in patients: cluster randomised trial                                            | Duclos, A.; Chollet, F.; Pascal, L.; Ormando, H.; Carty, M. J.; Polazzi, S.; Lifante, J. C.                                                                                                      | 2020 | Bmj                                  | 371 |      | m3840     | 10.1136/bmj.m3840                             | #18449 | Exclusion reason: Wrong population (not nurses)                                      |
| Effect of multifaceted intervention promoting early switch from intravenous to oral acetaminophen for postoperative pain: Controlled, prospective, before and after study   | Ripouteau, Claire; Conort, Ornella; Lamas, Jean Paul; Auleley, Guy-Robert; Hazebroucq, Georges; Durieux, Pierre                                                                                  | 2000 | BMJ: British Medical Journal         | 321 | 7274 | 1460-1463 | 10.1136/bmj.321.7274.1460                     | #2830  | Exclusion reason: Wrong study design (not a RCT or a nonrandomized controlled study) |
| Effect of on-The-Job versus off-the-Job Training Related to Patient Safety Goals on Staff Nurses' Performance                                                               | Hamed, Mohammed Mohammed; Fakhry, Samah Faisal; Saad, Nema Fathy                                                                                                                                 | 2022 | HIV Nursing                          | 22  | 2    | 1791-1798 | 10.31838/hiv22.02.343                         | #20630 | Exclusion reason: Wrong outcomes (not related to behaviour/clinical practice)        |
| Effect of Peer Benchmarking on Specialist Electronic Consult Performance in a Los Angeles Safety-Net: a Cluster Randomized Trial                                            | Meeker, D.; Friedberg, M. W.; Knight, T. K.; Doctor, J. N.; Zein, D.; Cayasso-McIntosh, N.; Goldstein, N. J.; Fox, C. R.; Linder, J. A.; Persell, S. D.; Dea, S.; Giboney, P.; Yee, H. F.        | 2022 | JOURNAL OF GENERAL INTERNAL MEDICINE | 37  | 6    | 1400-1407 | https://dx.doi.org/10.1007/s11606-021-07002-1 | #21387 | Exclusion reason: Wrong population (not nurses)                                      |
| Effect of Promoting High-Quality Staff Interactions on Fall Prevention in Nursing Homes: A Cluster-Randomized Trial                                                         | Colon-Emeric, C. S.; Corazzini, K.; McConnell, E. S.; Pan, W.; Toles, M.; Hall, R.; Cary, M. P., Jr.; Batchelor-Murphy, M.; Yap, T.; Anderson, A. L.; Burd, A.; Amarasekara, S.; Anderson, R. A. | 2017 | JAMA Intern Med                      | 177 | 11   | 1634-1641 | 10.1001/jamainternmed.2017.5073               | #12818 | Exclusion reason: Wrong population (not nurses)                                      |
| Effect of provider prompts on adolescent immunization rates: a randomized trial                                                                                             | Szilagyi, P. G.; Serwint, J. R.; Humiston, S. G.; Rand, C. M.; Schaffer, S.; Vincelli, P.; Dhepyasuwan, N.; Blumkin, A.; Albertin, C.; Curtis, C. R.                                             | 2015 | Acad Pediatr                         | 15  | 2    | 149-57    | 10.1016/j.acap.2014.10.006                    | #14455 | Exclusion reason: Wrong intervention (not an implementation intervention)            |
| Effect of the Geriatric Emergency Department Intervention on outcomes of care for residents of aged care facilities: A non-Randomised trial                                 | Marsden, Elizabeth; Taylor, Andrea; Wallis, Marianne; Craswell, Alison; Broadbent, Marc; Barnett, Adrian; Crilly, Julia                                                                          | 2020 | Emergency Medicine Australasia       | 32  | 3    | 422-429   | 10.1111/1742-6723.13415                       | #18631 | Exclusion reason: Wrong outcomes (not related to behaviour/clinical practice)        |
| Effect of Varying Repositioning Frequency on Pressure Injury Prevention in Nursing Home Residents: TEAM-UP Trial Results                                                    | Yap, Tracey L.; Horn, Susan D.; Sharkey, Phoebe D.; Zheng, Tianyu; Bergstrom, Nancy; Colon-Emeric, Cathleen; Sabol, Valerie K.; Alderden,                                                        | 2022 | ADVANCES IN SKIN & WOUND CARE        | 35  | 6    | 315-325   | 10.1097/01.ASW.0000817840.68588.04            | #22508 | Exclusion reason: Wrong population (not nurses)                                      |

#### Additional file 4. Excluded articles at full text assessment stage and reasons for exclusion.

|                                                                                                                                                                                                                                   |                                                                                                                                                                                                 |      |                                             |    |              |           |                                                    |        |                                                                               |
|-----------------------------------------------------------------------------------------------------------------------------------------------------------------------------------------------------------------------------------|-------------------------------------------------------------------------------------------------------------------------------------------------------------------------------------------------|------|---------------------------------------------|----|--------------|-----------|----------------------------------------------------|--------|-------------------------------------------------------------------------------|
|                                                                                                                                                                                                                                   | Jenny; Yap, Winston; Kennerly, Susan M.                                                                                                                                                         |      |                                             |    |              |           |                                                    |        |                                                                               |
| Effect of virtual reality simulation training on the response capability of public health emergency reserve nurses in China: A quasiexperimental study                                                                            | Zhang, D.; Liao, H.; Jia, Y.; He, P.; Wang, D.; Chen, Y.; Yang, W.; Zhang, Y. P.                                                                                                                | 2021 | BMJ Open                                    | 11 | 9            | e048611   | https://dx.doi.org/10.1136/bmjopen-2021-048611     | #22560 | Exclusion reason: Wrong outcomes (not related to behaviour/clinical practice) |
| Effectiveness of a 'do not interrupt' vest intervention to reduce medication errors during medication administration: a multicenter cluster randomized controlled trial                                                           | Berdot, S.; Vilfailot, A.; Bezie, Y.; Perrin, G.; Berge, M.; Corny, J.; Thi, T. T. P.; Depoisson, M.; Guihaire, C.; Valin, N.; Decelle, C.; Karras, A.; Durieux, P.; Le, L. M. M.; Sabatier, B. | 2021 | BMC NURSING                                 | 20 | 1            |           | 10.1186/s12912-021-00671-7                         | #19930 | Exclusion reason: Wrong intervention (not an implementation intervention)     |
| Effectiveness of a clinic-based strategy for implementing the AHRQ Smoking Cessation Guideline in primary care                                                                                                                    | Katz, D. A.; Muehlenbruch, D. R.; Brown, R. B.; Fiore, M. C.; Baker, T. B.                                                                                                                      | 2002 | Prev Med                                    | 35 | 3            | 293-301   |                                                    | #3033  | Exclusion reason: Wrong population (not nurses)                               |
| Effectiveness Of A Multicomponent Implementation Strategy On Increasing Uptake Of USPSTF Hypertension Screening Recommendations In A Primary Care Network: The Embrace Cluster Randomized Trial                                   | Kronish, I. M.; Phillips, E.; Carter, E.; Alcantara, C.; Schwartz, J. E.; Razon, D. T.; Serafini, M. A.; Flatow, J.; Sanchez, J.; Shimbo, D.; Moise, N.                                         | 2022 | Hypertension                                | 79 | Supplement 1 |           | https://dx.doi.org/10.1161/hypertension.119.000000 | #21056 | Exclusion reason: Wrong type of paper (not a research article)                |
| Effectiveness of a Multicomponent Intervention to Reduce Multidrug-Resistant Organisms in Nursing Homes: A Cluster Randomized Clinical Trial                                                                                      | Mody, L.; Gontjes, K. J.; Cassone, M.; Gibson, K. E.; Lansing, B. J.; Mantey, J.; Kabeto, M.; Galecki, A.; Min, L.                                                                              | 2021 | JAMA Netw Open                              | 4  | 7            | e211655   | 10.1001/jamanetworkopen.2021.16555                 | #21446 | Exclusion reason: Wrong population (not nurses)                               |
| Effectiveness of a multifaceted intervention to improve emergency department care of low back pain: A stepped-wedge, cluster-randomised trial                                                                                     | Coombs, D. M.; Machado, G. C.; Richards, B.; Needs, C.; Buchbinder, R.; Harris, I. A.; Howard, K.; McCaffery, K.; Billot, L.; Edwards, J.; Rogan, E.; Facer, R.; Li, Q.; Maher, C. G.           | 2021 | BMJ Quality and Safety                      | 30 | 10           | 825-835   | https://dx.doi.org/10.1136/bmjqs-2020-012337       | #20217 | Exclusion reason: Wrong population (not nurses)                               |
| Effectiveness of a multifactorial intervention to reduce physical restraints in nursing home residents                                                                                                                            | Koczy, P.; Becker, C.; Rapp, K.; Klie, T.; Beische, D.; Buchele, G.; Kleiner, A.; Guerra, V.; Rissmann, U.; Kurrle, S.; Bredthauer, D.                                                          | 2011 | J Am Geriatr Soc                            | 59 | 2            | 333-9     | 10.1111/j.1532-5415.2010.03278.x                   | #6442  | Exclusion reason: Wrong population (not nurses)                               |
| Effectiveness of a Non-pharmacological Intervention to Control Diabetes Mellitus in a Primary Care Setting in Kerala: A Cluster-Randomized Controlled Trial                                                                       | Rahul, A.; Chintha, S.; Anish, T. S.; Prajitha, K. C.; Indu, P. S.                                                                                                                              | 2021 | Front Public Health                         | 9  |              | 747065    | 10.3389/fpubh.2021.747065                          | #21803 | Exclusion reason: Wrong outcomes (not related to behaviour/clinical practice) |
| Effectiveness of a tailored intervention to reduce antibiotics for urinary tract infections in nursing home residents: a cluster, randomised controlled trial                                                                     | Arnold, S. H.; Nygaard Jensen, J.; Bjerrum, L.; Siersma, V.; Winther Bang, C.; Brostrøm Kousgaard, M.; Holm, A.                                                                                 | 2021 | Lancet Infect Dis                           | 21 | 11           | 1549-1556 | 10.1016/s1473-3099(21)00001-3                      | #19842 | Exclusion reason: Wrong population (not nurses)                               |
| Effectiveness of a Technology-Enhanced Integrated Care Model for Frail Older People: A Stepped-Wedge Cluster Randomized Trial in Nursing Homes                                                                                    | Kim, H.; Jung, Y. I.; Kim, G. S.; Choi, H.; Park, Y. H.                                                                                                                                         | 2021 | Gerontologist                               | 61 | 3            | 460-469   | 10.1093/geront/gnaa090                             | #20990 | Exclusion reason: Wrong population (not nurses)                               |
| Effectiveness of an animation case-based learning approach to improve frontline nurses' knowledge and attitude on vital sign monitoring towards detecting clinical deterioration: A multi-site, pilot randomised controlled trial | Lin, Y. P.; Liaw, S. Y.; Chua, W. L.; Mok, W. Q.                                                                                                                                                | 2015 | Annals of the Academy of Medicine Singapore | 44 | 10 SUPPL. 1  | S238      |                                                    | #14838 | Exclusion reason: Wrong type of paper (not a research article)                |

#### Additional file 4. Excluded articles at full text assessment stage and reasons for exclusion.

|                                                                                                                                                                                                                                         |                                                                                                                                                                                 |      |                                               |     |            |           |                                              |        |                                                                               |
|-----------------------------------------------------------------------------------------------------------------------------------------------------------------------------------------------------------------------------------------|---------------------------------------------------------------------------------------------------------------------------------------------------------------------------------|------|-----------------------------------------------|-----|------------|-----------|----------------------------------------------|--------|-------------------------------------------------------------------------------|
| Effectiveness of an Evidence-Based Practice Training Program for Nurse Educators: A Cluster-Randomized Controlled Trial                                                                                                                 | D'Souza, Preethy; George, Anice; Nair, Sreekumaran; Noronha, Judith; Renjith, Vishnu                                                                                            | 2021 | WORLDVIEW S ON EVIDENCE-BASED NURSING         | 18  | 4          | 261-271   | 10.1111/wvn.12521                            | #20259 | Exclusion reason: Wrong outcomes (not related to behaviour/clinical practice) |
| Effectiveness of communication skill training on cancer truth-telling for advanced practice nurses in Taiwan: a pilot study                                                                                                             | Chen, S. Y.; Yang, S. C.; Chien, R. N.; Chen, S. H.; Chu, T. P.; Fujimori, M.; Tang, W. R.                                                                                      | 2021 | Psycho-oncology                               |     |            |           | https://dx.doi.org/10.1002/po.n.5629         | #20140 | Exclusion reason: Wrong outcomes (not related to behaviour/clinical practice) |
| Effectiveness of educational program using printed educational material on care burden distress among staff of residential aged care facilities without medical specialists and/or registered nurses: Cluster quasi-randomization study | Fukuda, Koji; Hattori, Hideyuki; Toba, Kenji; Terada, Seishi; Hashimoto, Mamoru; Ukai, Katsuyuki; Kumagai, Ryo; Suzuki, Mizue; Nagaya, Masahiro; Yoshida, Mika; Murotani, Kenta | 2018 | Geriatrics & Gerontology International        | 18  | 3          | 487-494   | 10.1111/ggi.13207                            | #11437 | Exclusion reason: Wrong population (not nurses)                               |
| Effectiveness of electronic point-of-care reminders versus monthly feedback to improve adherence to 10 clinical recommendations in primary care: a cluster randomized clinical trial                                                    | Coma, E.; Medina, M.; M@ndez, L.; Hermosilla, E.; Iglesias, M.; Olmos, C.; Calero, S.                                                                                           | 2019 | BMC Med Inform Decis Mak                      | 19  | 1          | 245       | 10.1186/s12911-019-0976-8                    | #19048 | Exclusion reason: Wrong population (not nurses)                               |
| Effectiveness of Evidence-Based Practice (EBP) Education on Emergency Nurses' EBP Attitudes, Knowledge, Self-Efficacy, Skills, and Behavior: A Randomized Controlled Trial                                                              | Koota, E.; K√\$ri√\$inen, M.; Kyng√\$s, H.; L√\$peri, M.; Melender, H. L.                                                                                                       | 2021 | Worldviews Evid Based Nurs                    | 18  | 1          | 23-32     | 10.1111/wvn.12485                            | #21034 | Exclusion reason: Wrong outcomes (not related to behaviour/clinical practice) |
| Effectiveness of health care worker training on the oral health of elderly residents of nursing homes                                                                                                                                   | Nicol, R.; Petrina Sweeney, M.; McHugh, S.; Bagg, J.                                                                                                                            | 2005 | Community Dent Oral Epidemiol                 | 33  | 2          | 115-24    | 10.1111/j.1600-0528.2004.00212.x             | #515   | Exclusion reason: Wrong population (not nurses)                               |
| Effectiveness of interactive discussion group in suicide risk assessment among general nurses in Taiwan: a randomized controlled trial                                                                                                  | Wu, C. Y.; Lin, Y. Y.; Yeh, M. C.; Huang, L. H.; Chen, S. J.; Liao, S. C.; Lee, M. B.                                                                                           | 2014 | Nurse Educ Today                              | 34  | 11         | 1388-94   | 10.1016/j.nedt.2014.03.015                   | #15121 | Exclusion reason: Wrong outcomes (not related to behaviour/clinical practice) |
| Effectiveness of multidisciplinary team training in obstetric emergencies: A randomized controlled trial                                                                                                                                | Van De Ven, J.                                                                                                                                                                  | 2012 | American Journal of Obstetrics and Gynecology | 206 | 1 SUPPL. 1 | S68       | http://dx.doi.org/10.1016/j.ajog.2011.10.145 | #17080 | Exclusion reason: Wrong type of paper (not a research article)                |
| Effectiveness of multifaceted hand hygiene interventions in long-term care facilities in Hong Kong: a cluster-randomized controlled trial                                                                                               | Ho, M. L.; Seto, W. H.; Wong, L. C.; Wong, T. Y.                                                                                                                                | 2012 | Infect Control Hosp Epidemiol                 | 33  | 8          | 761-7     | 10.1086/666740                               | #6001  | Exclusion reason: Wrong population (not nurses)                               |
| Effectiveness of Nursing Care Bundle in Terms of Knowledge and Practices Regarding Care of Patients on Mechanical Ventilator among Nursing Personnel                                                                                    | Aradhna,; Uma, D.; Amoldeep, S.                                                                                                                                                 | 2022 | International Journal of Nursing Education    | 14  | 2          | 50-57     | 10.37506/ijone.v14i2.17969                   | #19836 | Exclusion reason: Wrong intervention (not an implementation intervention);    |
| Effectiveness of short-term, enhanced, infection control support in improving compliance with infection control guidelines and practice in nursing homes: a cluster randomized trial                                                    | Rao, G Gopal; Jeanes, A; Russell, H; Wilson, D; Atere-Roberts, E; O'SULLIVAN, D; Donaldson, N                                                                                   | 2009 | Epidemiology & Infection                      | 137 | 10         | 1465-1471 |                                              | #19721 | Exclusion reason: Wrong population (not nurses)                               |

#### Additional file 4. Excluded articles at full text assessment stage and reasons for exclusion.

|                                                                                                                                                                                                          |                                                                                                                                                                                                                                                  |      |                                               |     |    |                 |                                                |        |                                                                               |
|----------------------------------------------------------------------------------------------------------------------------------------------------------------------------------------------------------|--------------------------------------------------------------------------------------------------------------------------------------------------------------------------------------------------------------------------------------------------|------|-----------------------------------------------|-----|----|-----------------|------------------------------------------------|--------|-------------------------------------------------------------------------------|
| Effectiveness of simulation based educational intervention on pediatric nurses' practice about tracheal intubation in Covid-19 pediatric Intensive Care Unit                                             | Hegazy, S. M. A.; Aboeisa, N. G.                                                                                                                                                                                                                 | 2022 | BIOSCIENCE RESEARCH                           | 19  | 2  | 1084-1097       |                                                | #20689 | Exclusion reason: Wrong outcomes (not related to behaviour/clinical practice) |
| Effectiveness of supervised implementation of an oral health care guideline in care homes; a single-blinded cluster randomized controlled trial                                                          | van der Putten, G. J.; Mulder, J.; de Baat, C.; De Visschere, L. M.; Vanobbergen, J. N.; Schols, J. M.                                                                                                                                           | 2013 | Clin Oral Investig                            | 17  | 4  | 1143-53         | 10.1007/s00784-012-0793-2                      | #16199 | Exclusion reason: Wrong population (not nurses)                               |
| Effectiveness of the Extension for Community Health Outcomes Model as Applied to Primary Care for Autism: A Partial Stepped-Wedge Randomized Clinical Trial                                              | Mazurek, Micah O.; Parker, Robert A.; Chan, James; Kuhlthau, Karen; Sohl, Kristin                                                                                                                                                                | 2020 | JAMA Pediatrics                               | 174 | 5  | e196306-e196306 | 10.1001/jamapediatrics.2019.6306               | #18616 | Exclusion reason: Wrong population (not nurses);                              |
| Effectiveness of Web-based versus face-to-face delivery of education in prescription of falls-prevention exercise to health professionals: randomized trial                                              | Maloney, S.; Haas, R.; Keating, J. L.; Molloy, E.; Jolly, B.; Sims, J.; Morgan, P.; Haines, T.                                                                                                                                                   | 2011 | J Med Internet Res                            | 13  | 4  | e116            | 10.2196/jmir.1680                              | #7033  | Exclusion reason: Wrong population (not nurses)                               |
| Effects of a computerised guideline support tool on child healthcare professionals' response to suspicions of child abuse and neglect: a community-based intervention trial                              | Konijnendijk, A. A. J.; Boere-Boonekamp, M. M.; Haasnoot, M. E.; Need, A.                                                                                                                                                                        | 2019 | BMC Med Inform Decis Mak                      | 19  | 1  | 161             | 10.1186/s12911-019-0884-y                      | #19201 | Exclusion reason: Wrong population (not nurses)                               |
| Effects of a cultural competence promotion program for multicultural maternity nursing care: Case-based small group learning                                                                             | Park, M. S.; Kweon, Y. R.                                                                                                                                                                                                                        | 2013 | Journal of Korean Academy of Nursing          | 43  | 5  | 626-635         | http://dx.doi.org/10.4040/jkan.2013.43.5.626   | #16408 | Exclusion reason: Wrong language (not English or French)                      |
| Effects of a Just-in-Time Educational Intervention Placed on Dressing Packages: A Multicenter Randomized Controlled Trial                                                                                | Kent, D.                                                                                                                                                                                                                                         | 2011 | Journal of Wound, Ostomy & Continence Nursing | 38  |    | S13-S13         |                                                | #6649  | Exclusion reason: Wrong outcomes (not related to behaviour/clinical practice) |
| Effects of a multicomponent intervention on functional outcomes and process of care in hospitalized older patients: a randomized controlled trial of Acute Care for Elders (ACE) in a community hospital | Counsell, S. R.; Holder, C. M.; Liebenauer, L. L.; Palmer, R. M.; Fortinsky, R. H.; Kresevic, D. M.; Quinn, L. M.; Allen, K. R.; Covinsky, K. E.; Landefeld, C. S.                                                                               | 2000 | J Am Geriatr Soc                              | 48  | 12 | 1572-81         |                                                | #2972  | Exclusion reason: Wrong intervention (not an implementation intervention)     |
| Effects of a multifaceted intervention to narrow the evidence-based gap in the treatment of high cardiovascular risk patients: The bridge cv prevention cluster randomized trial                         | Berwanger, O.; Machline-Carrion, M. J.; Soares, R. M.; Santos, J. Y.; Sampaio, B. D.; Damiani, L. P.; Campos, V.; Guimaraes, H. P.; Pontes-Neto, O. M.; Barros, P. G. M.; Stein, A. T.; Lopes, R. D.; Izar, M. C.; Piegas, L. S.; Fonseca, F. A. | 2018 | Circulation                                   | 138 | 25 | e756-e757       | http://dx.doi.org/10.1161/CIR.0000000000000636 | #11838 | Exclusion reason: Wrong type of paper (not a research article)                |
| Effects of a restraint minimization program on staff knowledge, attitudes, and practice: a cluster randomized trial                                                                                      | Pellfolk, T. J.; Gustafson, Y.; Bucht, G.; Karlsson, S.                                                                                                                                                                                          | 2010 | J Am Geriatr Soc                              | 58  | 1  | Sep-62          | 10.1111/j.1532-5415.2009.02629.x               | #7700  | Exclusion reason: Wrong population (not nurses)                               |
| Effects of a restraint reduction intervention and OBRA '87 regulations on psychoactive drug use in nursing homes                                                                                         | Siegler, E. L.; Capezuti, E.; Maislin, G.; Baumgarten, M.; Evans, L.; Strumpf, N.                                                                                                                                                                | 1997 | J Am Geriatr Soc                              | 45  | 7  | 791-6           |                                                | #3956  | Exclusion reason: Wrong population (not nurses)                               |

#### Additional file 4. Excluded articles at full text assessment stage and reasons for exclusion.

|                                                                                                                                                                                                |                                                                                                                                    |      |                                                       |        |        |               |                                     |        |                                                                               |
|------------------------------------------------------------------------------------------------------------------------------------------------------------------------------------------------|------------------------------------------------------------------------------------------------------------------------------------|------|-------------------------------------------------------|--------|--------|---------------|-------------------------------------|--------|-------------------------------------------------------------------------------|
| Effects of a simulation-based education programme on delirium care for critical care nurses: A randomized controlled trial                                                                     | Ho, M. H.; Yu, L. F.; Lin, P. H.; Chang, H. C.; Traynor, V.; Huang, W. C.; Montayre, J.; Chen, K. H.                               | 2021 | JOURNAL OF ADVANCED NURSING                           | 77     | 8      | 3483-3493     | 10.1111/jan.14938                   | #20718 | Exclusion reason: Wrong outcomes (not related to behaviour/clinical practice) |
| Effects of a virtual reality intervention on dementia care education among acute care nurses in Japan: A non-randomised controlled trial                                                       | Yamaguchi, Y.; Ryuno, H.; Fukuda, A.; Kabaya, S.; Isowa, T.; Hiramatsu, M.; Kitagawa, A.; Hattori, Y.; Williamson, A.; Greiner, C. | 2022 | Geriatr Nurs                                          | 48     |        | 269-273       | 10.1016/j.gerinurse.2022.10.013     | #22488 | Exclusion reason: Wrong outcomes (not related to behaviour/clinical practice) |
| Effects of an educational intervention on nurse practitioners' clinical breast examination techniques and ability to detect lumps in silicone breast models                                    | Waldmeier, V. P.                                                                                                                   | 2006 |                                                       | Ph.D.  |        | 146 p-146 p   |                                     | #10001 | Exclusion reason: Wrong type of paper (not a research article)                |
| Effects of an Electrocardiography Training Program: Team-Based Learning for Early-Stage Intensive Care Unit Nurses                                                                             | Kim, Soomi; Kim, Chul-Gyu                                                                                                          | 2020 | Journal of Continuing Education in Nursing            | 51     | 4      | 174-180       | 10.3928/0022-0124-20200317-07       | #18721 | Exclusion reason: Wrong outcomes (not related to behaviour/clinical practice) |
| Effects of an ethical empowerment program on critical care nurses' ethical decision-making                                                                                                     | Jamshidian, Fatemeh; Shahriari, Mohsen; Aderyani, Mohsen Rezaei                                                                    | 2019 | Nursing Ethics                                        | 26     | 4      | 1256-1264     | 10.1177/0969733018759830            | #10891 | Exclusion reason: Wrong outcomes (not related to behaviour/clinical practice) |
| Effects of an interprofessional Quality Circle-Deprescribing Module (QC-DeMo) in Swiss nursing homes: a randomised controlled trial                                                            | Cateau, D.; Ballabeni, P.; Niquille, A.                                                                                            | 2021 | BMC Geriatr                                           | 21     | 1      | 289           | 10.1186/s12877-021-02220-y          | #20084 | Exclusion reason: Wrong population (not nurses)                               |
| Effects of an intervention aimed at improving nurse-patient communication in an oncology outpatient clinic                                                                                     | Rask, M. T.; Jensen, M. L.; Andersen, J.; Zachariae, R.                                                                            | 2009 | Cancer Nurs                                           | 32     | 1      | E1-11         | 10.1097/01.Nc.c.0000343365.13871.12 | #8047  | Exclusion reason: Wrong outcomes (not related to behaviour/clinical practice) |
| Effects of case-based confusion assessment methods for intensive care unit training on delirium knowledge and delirium assessment accuracy of intensive care units: A quasi-experimental study | Kim, Young-Nam; Kim, Dong-Hee                                                                                                      | 2021 | NURSE EDUCATION TODAY                                 | 103    |        | N.PAG - N.PAG | 10.1016/j.nedt.2021.104954          | #20998 | Exclusion reason: Wrong outcomes (not related to behaviour/clinical practice) |
| Effects of community of practice and knowledge translation strategies on nurse practitioners' knowledge and practice behavior                                                                  | Holman, H. M.                                                                                                                      | 2009 |                                                       | D.N.P. |        | 147 p-147 p   |                                     | #8335  | Exclusion reason: Wrong type of paper (not a research article)                |
| Effects of different methods of reflection on nurses' gaze and judgement in a task using a touch panel                                                                                         | Nishimura, A.                                                                                                                      | 2018 | J Clin Nurs                                           | 27     | 04-Mar | e569-e577     | 10.1111/jocn.14096                  | #11708 | Exclusion reason: Wrong outcomes (not related to behaviour/clinical practice) |
| Effects of Early Warning Score (EWS) Tutorial Simulation on Nurses' Knowledge and Clinical Performance                                                                                         | Damayanti, Roshy; Trisyani, Yanny; Nuraeni, Aan                                                                                    | 2019 | Nurse Media Journal of Nursing                        | 9      | 2      | 231-241       | 10.14710/nmjn.v9i2.24821            | #18998 | Exclusion reason: Wrong outcomes (not related to behaviour/clinical practice) |
| Effects of monitor alarm management training on nurses' alarm fatigue: A randomised controlled trial                                                                                           | Bi, Jiasi; Yin, Xin; Li, Hongyan; Gao, Ruitong; Zhang, Qing; Zhong, Tangsheng; Zan, Tao; Guan, Baoxing; Li, Zhen                   | 2020 | Journal of Clinical Nursing (John Wiley & Sons, Inc.) | 29     | 21/22  | 4203-4216     | 10.1111/jocn.15452                  | #19380 | Exclusion reason: Wrong outcomes (not related to behaviour/clinical practice) |

#### Additional file 4. Excluded articles at full text assessment stage and reasons for exclusion.

|                                                                                                                                                                                                                              |                                                                                                                                                                                                              |      |                                             |       |   |                    |                                            |        |                                                                                      |
|------------------------------------------------------------------------------------------------------------------------------------------------------------------------------------------------------------------------------|--------------------------------------------------------------------------------------------------------------------------------------------------------------------------------------------------------------|------|---------------------------------------------|-------|---|--------------------|--------------------------------------------|--------|--------------------------------------------------------------------------------------|
| Effects of multidrug-resistant organism infection control simulation program on the infection control fatigue, job stress, and performance of nurses                                                                         | Lee, M. H.                                                                                                                                                                                                   | 2021 | Medico-Legal Update                         | 21    | 1 | 1267-1272          | https://dx.doi.org/10.37506/mlu.v21i1.2493 | #21125 | Exclusion reason: Wrong outcomes (not related to behaviour/clinical practice)        |
| Effects of PACE guide training on the management of asthma and chronic obstructive pulmonary disease by primary care clinicians: a pragmatic cluster randomised controlled trial in Florianopolis, Brazil                    | Bachmann, M. O.; Bateman, E. D.; Stelmach, R.; Cruz, A. A.; de Andrade, M. P.; Zonta, R.; Zepeda, J.; Natal, S.; Cornick, R. V.; Wattrus, C.; Anderson, L.; Georgeu--Pepper, D.; Lombard, C.; Fairall, L. R. | 2019 | Bmj Global Health                           | 4     | 6 |                    | 10.1136/bmjgh-2019-001921                  | #19444 | Exclusion reason: Wrong population (not nurses)                                      |
| Effects of perceived educational support on usage of an internet nursing reference center                                                                                                                                    | Marshall, B. L.; Sabbagh, L.                                                                                                                                                                                 | 2015 | J Contin Educ Nurs                          | 46    | 4 | 161-8; quiz 169-70 | 10.3928/00220124-20150320-01               | #14818 | Exclusion reason: Wrong outcomes (not related to behaviour/clinical practice)        |
| Effects of primary care antimicrobial stewardship outreach on antibiotic use by general practice staff: pragmatic randomized controlled trial of the TARGET antibiotics workshop                                             | McNulty, Clodna; Hawking, Meredith; Lecky, Donna; Jones, Leah; Owens, Rebecca; Charlett, Andr©; Butler, Chris; Moore, Philippa; Francis, Nick                                                                | 2018 | Journal of Antimicrobial Chemotherapy (JAC) | 73    | 5 | 1423-1432          | 10.1093/jac/dky004                         | #11759 | Exclusion reason: Wrong population (not nurses)                                      |
| Effects of reflection on clinical decision-making of intensive care unit nurses                                                                                                                                              | Razieh, S.; Somayeh, G.; Fariba, H.                                                                                                                                                                          | 2018 | Nurse Education Today                       | 66    |   | 14-Oct             | 10.1016/j.nedt.2018.03.009                 | #11632 | Exclusion reason: Wrong outcomes (not related to behaviour/clinical practice)        |
| Effects of Standardized Patient-Based Training on Surgical Nurses' Competencies for Managing Hand Injuries                                                                                                                   | Hong, Hyun Seon; Issenberg, S. Barry; Roh, Young Sook                                                                                                                                                        | 2020 | Journal of Continuing Education in Nursing  | 51    | 4 | 189-196            | 10.3928/00220124-20200317-09               | #18049 | Exclusion reason: Wrong outcomes (not related to behaviour/clinical practice)        |
| Effects of the implementation of the web-based patient support system on staff's attitudes towards computers and IT use: a randomised controlled trial                                                                       | Koivunen, M.; Valimaki, M.; Patel, A.; Knapp, M.; Hatonen, H.; Kuosmanen, L.; Pitkanen, A.; Anttila, M.; Katajisto, J.                                                                                       | 2010 | Scand J Caring Sci                          | 24    | 3 | 592-9              | 10.1111/j.1471-6712.2009.00755.x           | #7403  | Exclusion reason: Wrong intervention (not an implementation intervention)            |
| Effects of using human patient simulator versus a CD-ROM on learning the management of patients exposed to chemical agents                                                                                                   | Johnson, D.; Flagg, A.; Dremsa, T. L.                                                                                                                                                                        | 2010 | US Army Med Dep J                           |       |   | 16-Sep             |                                            | #7440  | Exclusion reason: Wrong outcomes (not related to behaviour/clinical practice)        |
| Effects on staff outcomes and process evaluation of the educating nursing staff effectively (TENSE) program for managing challenging behavior in nursing home residents with dementia: A cluster-randomized controlled trial | Bielderman, A.; Nieuwenhuis, A.; Hazelhof, Tjgm; van Gaal, B. G. I.; Schoonhoven, L.; Akkermans, R. P.; Spijker, A.; Koopmans, Rtc; Gerritsen, D. L.                                                         | 2021 | Int J Nurs Stud                             | 120   |   | 103982             | 10.1016/j.ijnurstu.2021.103982             | #19948 | Exclusion reason: Wrong outcomes (not related to behaviour/clinical practice)        |
| Efficacy of a behavioral intervention to decrease medication transcription errors among professional nurses                                                                                                                  | Becker, K.                                                                                                                                                                                                   | 2009 |                                             | Ph.D. |   | 117 p-117 p        |                                            | #8587  | Exclusion reason: Wrong type of paper (not a research article)                       |
| Efficacy of a Simulation Program to Improve Clinical Judgment and Clinical Competence Among Graduate Nurses                                                                                                                  | Cantrell, M. A.; Mariani, B.; Lengetti, E.                                                                                                                                                                   | 2021 | Nurs Educ Perspect                          | 42    | 3 | 142-147            | 10.1097/01.Ne p.0000000000000805           | #20059 | Exclusion reason: Wrong outcomes (not related to behaviour/clinical practice)        |
| Efficacy of a skin tear education program: improving the knowledge of nurses practicing in acute care settings                                                                                                               | McTigue, T.; D'Andrea, S.; Doyle-Munoz, J.; Forrester, D. A.                                                                                                                                                 | 2009 | J Wound Ostomy Continence Nurs              | 36    | 5 | 486-92             | 10.1097/WON.0b013e3181b35ebd               | #8523  | Exclusion reason: Wrong study design (not a RCT or a nonrandomized controlled study) |



#### Additional file 4. Excluded articles at full text assessment stage and reasons for exclusion.

|                                                                                                                                                          |                                                                                                                                                                                               |      |                                       |     |                |           |                                              |        |                                                                                      |
|----------------------------------------------------------------------------------------------------------------------------------------------------------|-----------------------------------------------------------------------------------------------------------------------------------------------------------------------------------------------|------|---------------------------------------|-----|----------------|-----------|----------------------------------------------|--------|--------------------------------------------------------------------------------------|
| Efficacy of a theory-driven program to implement alcohol screening and brief interventions in primary health-care: a cluster randomized controlled trial | Rosario, F.; Vasiljevic, M.; Pas, L.; Angus, C.; Ribeiro, C.; Fitzgerald, N.                                                                                                                  | 2022 | Addiction                             | 117 | 6              | 1609-1621 | 10.1111/add.15782                            | #21887 | Exclusion reason: Wrong outcomes (not related to behaviour/clinical practice)        |
| Efficacy of evidence-based medicine training for primary healthcare professionals: a non-randomized controlled trial                                     | Fei, J.; Li, Y.; Gao, W.; Li, J.                                                                                                                                                              | 2018 | BMC Med Educ                          | 18  | 1              | 299       | 10.1186/s12909-018-1404-y                    | #11460 | Exclusion reason: Wrong population (not nurses)                                      |
| Efficacy of feedback from quarterly laboratory comparison in maintaining quality of a hospital capillary blood glucose monitoring program                | Jones, H. E.; Cleave, B.; Zinman, B.; Szalai, J. P.; Nichol, H. L.; Hoffman, B. R.                                                                                                            | 1996 | Diabetes Care                         | 19  | 2              | 168-70    |                                              | #4205  | Exclusion reason: Wrong outcomes (not related to behaviour/clinical practice)        |
| Efficacy of the end-of-life nursing care continuing education program for nurses in general wards in Japan                                               | Yoshioka, S.; Moriyama, M.; Ohno, Y.                                                                                                                                                          | 2014 | Am J Hosp Palliat Care                | 31  | 5              | 513-20    | 10.1177/1049909113491133                     | #15113 | Exclusion reason: Wrong study design (not a RCT or a nonrandomized controlled study) |
| Electronic alerts for triage protocol compliance among emergency department triage nurses: a randomized controlled trial                                 | Holmes, J. F.; Freilich, J.; Taylor, S. L.; Buettner, D.                                                                                                                                      | 2015 | Nurs Res                              | 64  | 3              | 226-30    | 10.1097/nnr.000000000000094                  | #14934 | Exclusion reason: Wrong study design (not a RCT or a nonrandomized controlled study) |
| Electronic health record innovations to improve referral for asymptomatic hypertension in the emergency department                                       | Souffront, K.; Richardson, L.                                                                                                                                                                 | 2017 | Annals of Emergency Medicine          | 70  | 4 Supplement 1 | S103      |                                              | #12423 | Exclusion reason: Wrong type of paper (not a research article)                       |
| Electronic Learning Management System Integration Impact on Tertiary Care Hospital Learners' Educational Performance                                     | Tassi, Ahmad                                                                                                                                                                                  | 2016 | ProQuest LLC                          |     |                |           |                                              | #13261 | Exclusion reason: Wrong type of paper (not a research article)                       |
| Engaging Caregivers in Health-Related Housing Decisions for Older Adults With Cognitive Impairment: A Cluster Randomized Trial                           | Adekpedjou, R.; Stacey, D.; Briere, N.; Freitas, A.; Garvelink, M. M.; Dogba, M. J.; Durand, P. J.; Desroches, S.; Croteau, J.; Rivest, L. P.; Lavigne, F.                                    | 2020 | Gerontologist                         | 60  | 5              | 947-957   | 10.1093/geront/gnz045                        | #19685 | Exclusion reason: Wrong population (not nurses)                                      |
| Enhanced coordination of care to reduce medication risks in older home care clients in primary care: a randomized controlled trial                       | Toivo, Terhi; Airaksinen, Marja; Dimitrow, Maarit; Savela, Eeva; Pelkonen, Katariina; Kiuru, Valtteri; Suominen, Tuula; Uunimäki, Mira; Kivelä, Sirkka-Liisa; Leikola, Saija; Puustinen, Juha | 2019 | Bmc Geriatrics                        | 19  | 1              | 11-Jan    | 10.1186/s12877-019-1353-2                    | #17663 | Exclusion reason: Wrong outcomes (not related to behaviour/clinical practice)        |
| Evaluating an educational intervention of central venous catheter maintenance among oncology nurses                                                      | Bubb, T. N.                                                                                                                                                                                   | 2015 | American Journal of Infection Control | 43  | 6 Supplement 1 | S37       |                                              | #15592 | Exclusion reason: Wrong type of paper (not a research article)                       |
| Evaluating an Online Intervention to Improve Provider Management of Prenatal Depression: Randomized Control Trial                                        | Leiferman, J. A.; Lee-Winn, A. E.; Lacy, R.; Paulson, J. F.                                                                                                                                   | 2022 | Women's Health Issues                 |     |                |           | https://dx.doi.org/10.1016/j.whi.2022.08.009 | #21134 | Exclusion reason: Wrong population (not nurses)                                      |
| Evaluating the efficacy of the infection control liaison nurse in the hospital                                                                           | Ching, T. Y.; Seto, W. H.                                                                                                                                                                     | 1990 | J Adv Nurs                            | 15  | 10             | 1128-31   |                                              | #5400  | Exclusion reason: Wrong intervention (not an implementation intervention)            |

#### Additional file 4. Excluded articles at full text assessment stage and reasons for exclusion.

|                                                                                                                                                                                            |                                                                                                                                                                                                                                                                                                                                                                                |      |                                                           |      |   |         |                                  |        |                                                                                      |
|--------------------------------------------------------------------------------------------------------------------------------------------------------------------------------------------|--------------------------------------------------------------------------------------------------------------------------------------------------------------------------------------------------------------------------------------------------------------------------------------------------------------------------------------------------------------------------------|------|-----------------------------------------------------------|------|---|---------|----------------------------------|--------|--------------------------------------------------------------------------------------|
| Evaluating the Implementation of a Multi-Component Intervention to Prevent Surgical Site Infection and Promote Evidence-Based Practice                                                     | Lin, F. C.; Marshall, A. P.; Gillespie, B.; Li, Y.; O'Callaghan, F.; Morrissey, S.; Whitelock, K.; Morley, N.; Chaboyer, W.                                                                                                                                                                                                                                                    | 2020 | Worldviews on Evidence-Based Nursing                      | 17   | 3 | 193-201 | 10.1111/wvn.12436                | #19581 | Exclusion reason: Wrong study design (not a RCT or a nonrandomized controlled study) |
| Evaluating the Utility of a Structured Clinical Protocol for Reducing the Impact of Behavioural and Psychological Symptoms of Dementia in Progressive Neurological Diseases: A Pilot Study | Ryan, N. P.; Scott, L.; McPhee, M.; Mathers, S.; Davis, M. C.; Maule, R.; Fisher, F.                                                                                                                                                                                                                                                                                           | 2018 | Behav Neurol                                              | 2018 |   | 5420531 | 10.1155/2018/5420531             | #11592 | Exclusion reason: Wrong outcomes (not related to behaviour/clinical practice)        |
| Evaluation of a fetal monitoring education program                                                                                                                                         | Trepanier, M. J.; Niday, P.; Davies, B.; Sprague, A.; Nimrod, C.; Dulberg, C.; Watters, N.                                                                                                                                                                                                                                                                                     | 1996 | J Obstet Gynecol Neonatal Nurs                            | 25   | 2 | 137-44  |                                  | #4076  | Exclusion reason: Wrong outcomes (not related to behaviour/clinical practice)        |
| Evaluation of a Hospital-Based Nursing Research and Evidence-Based Practice Mentorship Program on Improving Nurses' Knowledge, Attitudes, and Evidence-Based Practice                      | Chan, Ee-Yuee; Glass, George Frederick; Phang, Koh Ni                                                                                                                                                                                                                                                                                                                          | 2020 | Journal of Continuing Education in Nursing                | 51   | 1 | 46-52   | 10.3928/00220124-20191217-09     | #19079 | Exclusion reason: Wrong study design (not a RCT or a nonrandomized controlled study) |
| Evaluation of a nurse-led dementia education and knowledge translation programme in primary care: A cluster randomized controlled trial                                                    | Wang, Y.; Xiao, L. D.; Ullah, S.; He, G. P.; De Bellis, A.                                                                                                                                                                                                                                                                                                                     | 2017 | Nurse Educ Today                                          | 49   |   | 07-Jan  | 10.1016/j.nedt.2016.10.016       | #12309 | Exclusion reason: Wrong population (not nurses)                                      |
| Evaluation of a Palliative Care Program for Nursing Homes in 7 Countries: The PACE Cluster-Randomized Clinical Trial                                                                       | Van den Block, L.; Honinx, E.; Pivodic, L.; Miranda, R.; Onwuteaka-Philipsen, B. D.; van Hout, H.; Pasma, H. R. W.; Oosterveld-Vlug, M.; Ten Koppel, M.; Piers, R.; Van Den Noortgate, N.; Engels, Y.; Vernooij-Dassen, M.; Hockley, J.; Froggatt, K.; Payne, S.; Szczerbinska, K.; Kylvonen, M.; Gambassi, G.; Pautex, S.; Bassal, C.; De Buysser, S.; Deliens, L.; Smets, T. | 2020 | JAMA Intern Med                                           | 180  | 2 | 233-242 | 10.1001/jamainternmed.2019.5349  | #17602 | Exclusion reason: Wrong outcomes (not related to behaviour/clinical practice)        |
| Evaluation of a pilot training program in alcohol screening, brief intervention, and referral to treatment for nurses in inpatient settings                                                | Broyles, L. M.; Gordon, A. J.; Rodriguez, K. L.; Hanusa, B. H.; Kengor, C.; Kraemer, K. L.                                                                                                                                                                                                                                                                                     | 2013 | J Addict Nurs                                             | 24   | 1 | 19-Aug  | 10.1097/JAN.0b013e31828767ef     | #16879 | Exclusion reason: Wrong outcomes (not related to behaviour/clinical practice)        |
| Evaluation of a Training to Improve Management of Pediatric Overweight                                                                                                                     | Hinchman, Josephine; Beno, Luke; Dennison, David; Trowbridge, Frederick                                                                                                                                                                                                                                                                                                        |      | Journal of Continuing Education in the Health Professions | 25   | 4 | 259-267 |                                  | #5683  | Exclusion reason: Wrong population (not nurses)                                      |
| Evaluation of a web-based course for community nurses on postpartum emotional distress                                                                                                     | Ingadottir, E.; Thome, M.                                                                                                                                                                                                                                                                                                                                                      | 2006 | Scand J Caring Sci                                        | 20   | 1 | 86-92   | 10.1111/j.1471-6712.2006.00385.x | #10532 | Exclusion reason: Wrong outcomes (not related to behaviour/clinical practice)        |
| Evaluation of a Web-based education program on reducing medication dosing error: a multicenter, randomized controlled trial                                                                | Frush, K.; Hohenhaus, S.; Luo, X.; Gerardi, M.; Wiebe, R. A.                                                                                                                                                                                                                                                                                                                   | 2006 | Pediatric Emergency Care                                  | 22   | 1 | 62-70   |                                  | #57    | Exclusion reason: Wrong population (not nurses)                                      |
| Evaluation of a web-based graduate continuing nursing education program in Japan: A randomized controlled trial                                                                            | Horiuchi, S.; Yaju, Y.; Koyo, M.; Sakyō, Y.; Nakayama, K.                                                                                                                                                                                                                                                                                                                      | 2009 | Nurse Education Today                                     | 29   | 2 | 140-149 | 10.1016/j.nedt.2008.08.009       | #17370 | Exclusion reason: Wrong outcomes (not related to)                                    |

#### Additional file 4. Excluded articles at full text assessment stage and reasons for exclusion.

|                                                                                                                                                                                                                                                                             |                                                                                                                                                                   |      |                                                  |     |              |         |                                            |        |                                                                                      |
|-----------------------------------------------------------------------------------------------------------------------------------------------------------------------------------------------------------------------------------------------------------------------------|-------------------------------------------------------------------------------------------------------------------------------------------------------------------|------|--------------------------------------------------|-----|--------------|---------|--------------------------------------------|--------|--------------------------------------------------------------------------------------|
|                                                                                                                                                                                                                                                                             |                                                                                                                                                                   |      |                                                  |     |              |         |                                            |        | behaviour/clinical practice)                                                         |
| Evaluation of a WeChat-based dementia-specific training program for nurses in primary care settings: A randomized controlled trial                                                                                                                                          | Wang, F.; Xiao, L. D.; Wang, K.; Li, M.; Yang, Y.                                                                                                                 | 2017 | Appl Nurs Res                                    | 38  |              | 51-59   | 10.1016/j.apnr.2017.09.008                 | #12311 | Exclusion reason: Wrong outcomes (not related to behaviour/clinical practice)        |
| Evaluation of an education package in leg ulcer management                                                                                                                                                                                                                  | Jones, J. E.; Nelson, E. A.                                                                                                                                       | 1997 | J Wound Care                                     | 6   | 7            | 342-3   |                                            | #4037  | Exclusion reason: Wrong outcomes (not related to behaviour/clinical practice)        |
| Evaluation of an educational "toolbox" for improving nursing staff competence and psychosocial work environment in elderly care: results of a prospective, non-randomized controlled intervention                                                                           | Arnetz, J. E.; Hasson, H.                                                                                                                                         | 2007 | Int J Nurs Stud                                  | 44  | 5            | 723-35  | 10.1016/j.ijnurstu.2006.01.012             | #9926  | Exclusion reason: Wrong outcomes (not related to behaviour/clinical practice)        |
| Evaluation of an electronic health record prompt for hepatitis c antibody screening of baby boomers in primary care-a cluster randomized control trial                                                                                                                      | Krauskopf, K.; Kil, N.; Sofianou, A.; Toribio, W.; Lyons, J.; Singer, M.; Kannry, J.; Smiith, B.; Rein, D. B.; Federman, A.                                       | 2014 | Journal of General Internal Medicine             | 29  | SUPPL. 1     | S88-S89 |                                            | #16185 | Exclusion reason: Wrong type of paper (not a research article)                       |
| Evaluation of fundamental critical care course in Kenya: knowledge, attitude, and practice                                                                                                                                                                                  | Macleod, J. B.; Jones, T.; Aphivantrakul, P.; Chupp, M.; Poenaru, D.                                                                                              | 2011 | J Surg Res                                       | 167 | 2            | 223-30  | 10.1016/j.jss.2009.08.030                  | #7043  | Exclusion reason: Wrong outcomes (not related to behaviour/clinical practice)        |
| Evaluation of Helping Babies Breathe Quality Improvement Cycle (HBB-QIC) on retention of neonatal resuscitation skills six months after training in Nepal                                                                                                                   | Kc, A.; Wrammert, J.; Nelin, V.; Clark, R. B.; Ewald, U.; Peterson, S.; Malqvist, M.                                                                              | 2017 | BMC Pediatr                                      | 17  | 1            | 103     | 10.1186/s12887-017-0853-5                  | #12962 | Exclusion reason: Wrong study design (not a RCT or a nonrandomized controlled study) |
| Evaluation of IMproving Palliative care Education and Training Using Simulation in Dementia (IMPETUS-D) a staff simulation training intervention to improve palliative care of people with advanced dementia living in nursing homes: a cluster randomised controlled trial | Tropea, J.; Nestel, D.; Johnson, C.; Hayes, B. J.; Hutchinson, A. F.; Brand, C.; Le, B. H.; Blackberry, I.; Caplan, G. A.; Bicknell, R.; Hepworth, G.; Lim, W. K. | 2022 | BMC Geriatr                                      | 22  | 1            | 127     | 10.1186/s12877-022-02809-x                 | #22269 | Exclusion reason: Wrong outcomes (not related to behaviour/clinical practice)        |
| Evaluation of team training impact on surgical outcomes: A cluster randomized trial                                                                                                                                                                                         | Duclos, A.; Peix, J. L.; Piriou, V.; Colin, C.                                                                                                                    | 2016 | International Journal for Quality in Health Care | 28  | Supplement 1 | 19      | http://dx.doi.org/10.1093/intqhc/mzw104.25 | #14050 | Exclusion reason: Wrong type of paper (not a research article)                       |
| Evaluation of the contributions of an electronic web-based reporting system: enabling action                                                                                                                                                                                | Levtzion-Korach, O.; Alcalai, H.; Orav, E. J.; Graydon-Baker, E.; Keohane, C.; Bates, D. W.; Frankel, A. S.                                                       | 2009 | J Patient Saf                                    | 5   | 1            | 15-Sep  | 10.1097/PTS.0b013e318198dc8d               | #8151  | Exclusion reason: Wrong study design (not a RCT or a nonrandomized controlled study) |
| Evaluation of the effect of information integration in displays for ICU nurses on situation awareness and task completion time: A prospective randomized controlled study                                                                                                   | Koch, Sven H.; Weir, Charlene; Westenskow, Dwayne; Gondan, Matthias; Agutter, Jim; Haar, Maral; Liu, David; Gvårges, Matthias; Staggers, Nancy                    | 2013 | International Journal of Medical Informatics     | 82  | 8            | 665-675 | 10.1016/j.ijmeinf.2012.10.002              | #16631 | Exclusion reason: Wrong intervention (not an implementation intervention)            |
| Evaluation of the effect of nurse education on patient-reported foot checks and foot care behaviour of people with diabetes receiving haemodialysis                                                                                                                         | Brand, S. L.; Musgrove, A.; Jeffcoate, W. J.; Lincoln, N. B.                                                                                                      | 2016 | Diabet Med                                       | 33  | 2            | 204-7   | 10.1111/dme.12831                          | #14666 | Exclusion reason: Wrong study design (not a RCT or a nonrandomized controlled study) |

#### Additional file 4. Excluded articles at full text assessment stage and reasons for exclusion.

|                                                                                                                                                                                                           |                                                                                                                                                                                                                         |      |                                                              |    |           |         |                                                    |        |                                                                                      |
|-----------------------------------------------------------------------------------------------------------------------------------------------------------------------------------------------------------|-------------------------------------------------------------------------------------------------------------------------------------------------------------------------------------------------------------------------|------|--------------------------------------------------------------|----|-----------|---------|----------------------------------------------------|--------|--------------------------------------------------------------------------------------|
| Evaluation of the Effectiveness of Testicular Cancer and Testicular Self-Examination Training for Patient Care Personnel: Intervention Study                                                              | Akar, Serife Zehra; Bebis, Hatice                                                                                                                                                                                       |      | Health Education Research                                    | 29 | 6         | 966-976 |                                                    | #5841  | Exclusion reason: Wrong population (not nurses)                                      |
| Evaluation of the impact of an educational initiative in diabetic foot management                                                                                                                         | Jones, J.; Gorman, A.                                                                                                                                                                                                   | 2004 | Br J Community Nurs                                          | 9  | 3         | S20-6   | 10.12968/bjcn.2004.9.Sup1.12504                    | #1505  | Exclusion reason: Wrong population (not nurses)                                      |
| Extended scope of nursing practice: a multicentre randomised controlled trial of appropriately trained nurses and pre-registration house officers in pre-operative assessment in elective general surgery | Kinley, H.; Czoski-Murray, C.; George, S.; McCabe, C.; Primrose, J.; Reilly, C.; Wood, R.; Nicolson, P.; Healy, C.; Read, S.; Norman, J.; Janke, E.; Alhameed, H.; Fernandez, N.; Thomas, E.                            | 2001 | Health Technology Assessment                                 | 5  | 35        | 1-87    |                                                    | #2449  | Exclusion reason: Wrong type of paper (not a research article)                       |
| Five-year impact of quality improvement for depression: results of a group-level randomized controlled trial                                                                                              | Wells, K.; Sherbourne, C.; Schoenbaum, M.; Ettner, S.; Duan, N.; Miranda, J.; Unutzer, J.; Rubenstein, L.                                                                                                               | 2004 | Arch Gen Psychiatry                                          | 61 | 4         | 378-86  | 10.1001/archpsyc.61.4.378                          | #1286  | Exclusion reason: Wrong population (not nurses)                                      |
| Forensic nursing science knowledge and competency: the use of simulation                                                                                                                                  | Drake, S. A.; Langford, R.; Young, A.; Ayers, C.                                                                                                                                                                        | 2015 | Crit Care Nurs Q                                             | 38 | 1         | Aug-81  | 10.1097/cnq.000000000000045                        | #15486 | Exclusion reason: Wrong outcomes (not related to behaviour/clinical practice)        |
| Formatting an experiential learning education module to encourage dysphagia assessment in apheresis patients                                                                                              | West, J.; Stutzman, S. E.; Atem, F.; Olson, D. M.                                                                                                                                                                       | 2018 | J Clin Apher                                                 | 33 | 1         | 72-77   | 10.1002/jca.21572                                  | #10975 | Exclusion reason: Wrong outcomes (not related to behaviour/clinical practice)        |
| Fostering evidence-based practice to improve nurse and cost outcomes in a community health setting: a pilot test of the advancing research and clinical practice through close collaboration model        | Levin, R. F.; Fineout-Overholt, E.; Melnyk, B. M.; Barnes, M.; Vetter, M. J.                                                                                                                                            | 2011 | Nurs Adm Q                                                   | 35 | 1         | 21-33   | 10.1097/NAQ.0b013e31820320ff                       | #6394  | Exclusion reason: Wrong outcomes (not related to behaviour/clinical practice)        |
| Frequency of Hand Decontamination of Intraoperative Providers and Reduction of Postoperative Healthcare-Associated Infections: A Randomized Clinical Trial of a Novel Hand Hygiene System                 | Koff, M. D.; Brown, J. R.; Marshall, E. J.; O'Malley, A. J.; Jensen, J. T.; Heard, S. O.; Longtine, K.; O'Neill, M.; Longtine, J.; Houston, D.; Robison, C.; Moulton, E.; Patel, H. M.; Loftus, R. W.                   | 2016 | Infect Control Hosp Epidemiol                                | 37 | 8         | 888-95  | 10.1017/ice.2016.106                               | #13730 | Exclusion reason: Wrong outcomes (not related to behaviour/clinical practice)        |
| From evidence-base to practice: implementation of the Nurse Family Partnership programme in England                                                                                                       | Barnes, J.                                                                                                                                                                                                              | 2010 | Journal of Children's Services                               | 5  | 4         | 17-Apr  |                                                    | #7849  | Exclusion reason: Wrong study design (not a RCT or a nonrandomized controlled study) |
| Handheld ultrasound-guided cannulation of difficult hemodialysis arteriovenous access: A randomized controlled trial                                                                                      | Chen, S.; Liu, J. S.; Chai, C. C.; Si, C.; Tan, S. H.; Ravindran, H. R.; Martinez, M. T. P.; Gao, Y.; Yeap, Y. R.; Liu, A. Y. L.                                                                                        | 2023 | Hemodial Int                                                 | 27 | 1         | 21-27   | 10.1111/hdi.13050                                  | #20138 | Exclusion reason: Wrong intervention (not an implementation intervention)            |
| Handwashing program for the prevention of nosocomial infections in a neonatal intensive care unit                                                                                                         | Won, S. P.; Chou, H. C.; Hsieh, W. S.; Chen, C. Y.; Huang, S. M.; Tsou, K. I.; Tsao, P. N.                                                                                                                              | 2004 | Infect Control Hosp Epidemiol                                | 25 | 9         | 742-6   | 10.1086/502470                                     | #866   | Exclusion reason: Wrong study design (not a RCT or a nonrandomized controlled study) |
| Healthcare professional improvement in confidence and competence in delivering allergy care following attendance at a 1-day allergic rhinitis and asthma workshop                                         | Hammersley, V.; Elton, R.; Walker, S.; Sheikh, A.; Akdis, C.; Bohle, B.; Bonadonna, P.; Bonini, S.; Calderon, M.; Cecchi, L.; Corrigan, C.; Custovic, A.; del Giacco, S.; Durham, S.; Eigenmann, P.; Eng, P.; Frew, A.; | 2010 | Allergy: European Journal of Allergy and Clinical Immunology | 65 | SUPPL. 92 | 143-144 | http://dx.doi.org/10.1111/j.1398-9995.2010.02392.x | #7508  | Exclusion reason: Wrong type of paper (not a research article)                       |

**Additional file 4. Excluded articles at full text assessment stage and reasons for exclusion.**

|                                                                                                                                                                                            |                                                                                                                                                                                                                                                                                                                                                    |      |                                                        |     |    |                  |                                                                                                           |        |                                                                                      |
|--------------------------------------------------------------------------------------------------------------------------------------------------------------------------------------------|----------------------------------------------------------------------------------------------------------------------------------------------------------------------------------------------------------------------------------------------------------------------------------------------------------------------------------------------------|------|--------------------------------------------------------|-----|----|------------------|-----------------------------------------------------------------------------------------------------------|--------|--------------------------------------------------------------------------------------|
|                                                                                                                                                                                            | Gevaert, P.; Grattan, C.; Hellings, P.; Hoffmann-Sommergruber, K.; Kalayci, O.; Knol, E.; Mari, A.; Moreira, A.; Moscato, G.; Ollert, M.; Pagani, M.; Passalacqua, G.; Powell, R.; Raulf-Heimsoth, M.; Roberts, G.; Rueff, F.; Scadding, G.; Scharf, C.; Schmid-Grendelmeier, P.; Schwarze, J.; Smith, H.; Virchow, J. C.; Wardlaw, A.; Werfel, T. |      |                                                        |     |    |                  |                                                                                                           |        |                                                                                      |
| HealthTracker: Does electronic decision support improve identification and management of cardiovascular risk in australian primary health care                                             | Panaretto, K. S.; Peiris, D.; Usherwood, T.; Harris, M.; Hunt, J.; Patel, A.                                                                                                                                                                                                                                                                       | 2012 | Circulation                                            | 125 | 19 | e808             | <a href="http://dx.doi.org/10.1161/CIR.0b013e31824fcd3">http://dx.doi.org/10.1161/CIR.0b013e31824fcd3</a> | #17348 | Exclusion reason: Wrong type of paper (not a research article)                       |
| Helping hands: a cluster randomised trial to evaluate the effectiveness of two different strategies for promoting hand hygiene in hospital nurses                                          | Huis, A.; Schoonhoven, L.; Grol, R.; Borm, G.; Adang, E.; Hulscher, M.; van Achterberg, T.                                                                                                                                                                                                                                                         | 2011 | Implement Sci                                          | 6   |    | 101              | 10.1186/1748-5908-6-101                                                                                   | #6700  | Exclusion reason: Wrong type of paper (not a research article)                       |
| High-Fidelity Simulation Nurse Training Reduces Unplanned Interruption of Continuous Renal Replacement Therapy Sessions in Critically Ill Patients: The SimHeR Randomized Controlled Trial | Lemarie, P.; Husser Vidal, S.; Gergaud, S.; Verger, X.; Rineau, E.; Berton, J.; Parot-Schinkel, E.; Hamel, J. F.; Lasocki, S.                                                                                                                                                                                                                      | 2019 | Anesth Analg                                           | 129 | 1  | 121-128          | 10.1213/ane.0000000000003581                                                                              | #19624 | Exclusion reason: Wrong outcomes (not related to behaviour/clinical practice)        |
| How Feasible Is Implementation of Distress Screening by Cancer Clinicians in Routine Clinical Care?                                                                                        | Mitchell, A. J.; Lord, K.; Slattery, J.; Grainger, L.; Symonds, P.                                                                                                                                                                                                                                                                                 | 2012 | Cancer                                                 | 118 | 24 | 6260-6269        | 10.1002/cncr.27648                                                                                        | #5884  | Exclusion reason: Wrong population (not nurses)                                      |
| How the Routine Use of Patient-Reported Outcome Measures for Hemodialysis Care Influences Patient-Clinician Communication A Mixed-Methods Study                                            | Schick-Makaroff, K.; Wozniak, L. A.; Short, H.; Davison, S. N.; Klarenbach, S.; Buzinski, R.; Walsh, M.; Johnson, J. A.                                                                                                                                                                                                                            | 2022 | Clinical Journal of the American Society of Nephrology | 17  | 11 | 1631-1645        | <a href="https://dx.doi.org/10.2215/CJN.05940522">https://dx.doi.org/10.2215/CJN.05940522</a>             | #21977 | Exclusion reason: Wrong study design (not a RCT or a nonrandomized controlled study) |
| Impact of a computerized information system on quality of nutritional support in the ICU                                                                                                   | Berger, M. M.; Revelly, J. P.; Wasserfallen, J. B.; Schmid, A.; Bouvry, S.; Cayeux, M. C.; Musset, M.; Maravic, P.; Chiolero, R. L.                                                                                                                                                                                                                | 2006 | Nutrition                                              | 22  | 3  | 221-229          | 10.1016/j.nut.2005.04.017                                                                                 | #237   | Exclusion reason: Wrong study design (not a RCT or a nonrandomized controlled study) |
| Impact of a continuing education activity on the quality of telephone interventions by nurses in an adult asthma client base                                                               | Boutin, H.; Robichaud, P.; Valois, P.; Labrecque, M.                                                                                                                                                                                                                                                                                               | 2006 | J Nurs Care Qual                                       | 21  | 4  | 335-43           |                                                                                                           | #223   | Exclusion reason: Wrong study design (not a RCT or a nonrandomized controlled study) |
| Impact of a formal breastfeeding education program                                                                                                                                         | Mellin, P. S.; Poplawski, D. T.; Gole, A.; Mass, S. B.                                                                                                                                                                                                                                                                                             | 2011 | MCN Am J Matern Child Nurs                             | 36  | 2  | 82-8; quiz 89-90 | 10.1097/NMC.0b013e318205589e                                                                              | #6992  | Exclusion reason: Wrong study design (not a RCT or a nonrandomized controlled study) |
| Impact of a Formal Educational Skill, "Building Program Based on the ARCC Model to Enhance Evidence-Based Practice Competency in Nurse Teams                                               | Gorsuch, Col Penelope F.; Gallagher Ford, Lynn; Koshy Thomas, Bindu; Melnyk, Bernadette Mazurek; Connor, Linda                                                                                                                                                                                                                                     | 2020 | Worldviews on Evidence-Based Nursing                   | 17  | 4  | 258-268          | 10.1111/wvn.12463                                                                                         | #18347 | Exclusion reason: Wrong study design (not a RCT or a nonrandomized controlled study) |
| Impact of a multicomponent hand hygiene-related intervention on the infectious risk in nursing homes: A cluster randomized trial                                                           | Temime, L.; Cohen, N.; Ait-Bouziad, K.; Denormandie, P.; Dab, W.; Hocine, M. N.                                                                                                                                                                                                                                                                    | 2018 | Am J Infect Control                                    | 46  | 2  | 173-179          | 10.1016/j.ajic.2017.08.030                                                                                | #11042 | Exclusion reason: Wrong population (not nurses)                                      |

#### Additional file 4. Excluded articles at full text assessment stage and reasons for exclusion.

|                                                                                                                                                                                                                                                                                                          |                                                                                                                                                                                                                                                                        |      |                              |     |              |         |                                        |        |                                                                               |
|----------------------------------------------------------------------------------------------------------------------------------------------------------------------------------------------------------------------------------------------------------------------------------------------------------|------------------------------------------------------------------------------------------------------------------------------------------------------------------------------------------------------------------------------------------------------------------------|------|------------------------------|-----|--------------|---------|----------------------------------------|--------|-------------------------------------------------------------------------------|
| Impact of a multifaceted intervention on nurses' and physicians' attitudes and behaviors toward family presence during resuscitation                                                                                                                                                                     | Mian, P.; Warchal, S.; Whitney, S.; Fitzmaurice, J.; Tancredi, D.                                                                                                                                                                                                      | 2007 | Crit Care Nurse              | 27  | 1            | 52-61   |                                        | #9681  | Exclusion reason: Wrong population (not nurses)                               |
| Impact of a multifaceted intervention to improve the clinical management of osteoporosis. The ESOSVAL-F study                                                                                                                                                                                            | Sanfeliix-Genoves, J.; Peiro, S.; Sanfeliix-Gimeno, G.; Hurtado, I.; Pascual de la Torre, M.; Trillo-Mata, J. L.; Giner-Ruiz, V.                                                                                                                                       | 2010 | BMC Health Serv Res          | 10  |              | 292     | 10.1186/1472-6963-10-292               | #7653  | Exclusion reason: Wrong population (not nurses)                               |
| Impact of a nurse-led intervention to improve screening for cardiovascular risk factors in people with severe mental illnesses. Phase-two cluster randomised feasibility trial of community mental health teams                                                                                          | Osborn, D. P.; Nazareth, I.; Wright, C. A.; King, M. B.                                                                                                                                                                                                                | 2010 | BMC Health Serv Res          | 10  |              | 61      | 10.1186/1472-6963-10-61                | #7719  | Exclusion reason: Wrong population (not nurses)                               |
| Impact of a nursing education program about caring for patients in Japan with malignant pleural mesothelioma on nurses' knowledge, difficulties and attitude: a randomized control trial                                                                                                                 | Nagamatsu, Y.; Natori, Y.; Yanai, H.; Horiuchi, S.                                                                                                                                                                                                                     | 2014 | Nurse Educ Today             | 34  | 7            | 1087-93 | 10.1016/j.nedt.2014.02.007             | #15447 | Exclusion reason: Wrong outcomes (not related to behaviour/clinical practice) |
| Impact of a structured HIV testing program in a hospital emergency department and a primary care center                                                                                                                                                                                                  | Gomez-Ayerbe, C.; Martinez-Sanz, J.; Muriel, A.; Elias, P. P.; Moreno, A.; Barea, R.; Polo, L.; Cano, A.; Uranga, A.; Santos, C.; Casado, J. L.; Quereda, C.; Robledillo, G.; Diaz-de Santiago, A.; Vivancos, M. J.; Drona, F.; Navas, E.; Moreno, S.; Elias, M. J. P. | 2019 | PLoS One                     | 14  | 8            |         | 10.1371/journal.pone.0220375           | #18352 | Exclusion reason: Wrong population (not nurses)                               |
| Impact of an early detection program on breast cancer services, incidence, and stage in Rural Rwanda                                                                                                                                                                                                     | Pace, L. E.; Keating, N. L.; Dusengimana, J. M. V.; Hategekimana, V.; Rugema, V.; Muvugabigwi, G.; Schleimer, L. E.; Umwizerwa, A.; Shyirambere, C.; Shulman, L. N.; Mpunga, T.                                                                                        | 2018 | Journal of Global Oncology   | 4   | Supplement 3 | 34S     | http://dx.doi.org/10.1200/JGO.18.10380 | #11684 | Exclusion reason: Wrong type of paper (not a research article)                |
| Impact of Antipsychotic Review and Nonpharmacological Intervention on Antipsychotic Use, Neuropsychiatric Symptoms, and Mortality in People With Dementia Living in Nursing Homes: A Factorial Cluster-Randomized Controlled Trial by the Well-Being and Health for People With Dementia (WHELD) Program | Ballard, C.; Orrell, M.; YongZhong, S.; Moniz-Cook, E.; Stafford, J.; Whittaker, R.; Woods, B.; Corbett, A.; Garrod, L.; Khan, Z.; Woodward-Carlton, B.; Wenborn, J.; Fossey, J.                                                                                       | 2016 | Am J Psychiatry              | 173 | 3            | 252-62  | 10.1176/appi.ajp.2015.15010130         | #14723 | Exclusion reason: Wrong population (not nurses)                               |
| Impact of disseminating quality improvement programs for depression in managed primary care: a randomized controlled trial                                                                                                                                                                               | Wells, K. B.; Sherbourne, C.; Schoenbaum, M.; Duan, N.; Meredith, L.; Unutzer, J.; Miranda, J.; Carney, M. F.; Rubenstein, L. V.                                                                                                                                       | 2000 | JAMA                         | 283 | 2            | 212-20  |                                        | #2485  | Exclusion reason: Wrong intervention (not an implementation intervention)     |
| Impact of eLearning course on nurses' professional competence in seclusion and restraint practices: 9-month follow-up results of a randomized controlled study (ISRCTN32869544)                                                                                                                          | Kontio, R.; Hatonen, H.; Joffe, G.; Pitkanen, A.; Lahti, M.; Valimaki, M.                                                                                                                                                                                              | 2013 | J Psychiatr Ment Health Nurs | 20  | 5            | 411-8   | 10.1111/j.1365-2850.2012.01933.x       | #16628 | Exclusion reason: Wrong outcomes (not related to behaviour/clinical practice) |
| Impact of function focused care in assisted living using the evidence                                                                                                                                                                                                                                    | Resnick, B.; Galik, E.; Boltz, M.                                                                                                                                                                                                                                      | 2021 | JOURNAL OF THE AMERICAN      | 69  | SUPPL 1      | S182    | https://dx.doi.org/10.1111/jgs.17115   | #21843 | Exclusion reason: Wrong type of paper (not a research article)                |

#### Additional file 4. Excluded articles at full text assessment stage and reasons for exclusion.

|                                                                                                                                                                                                                  |                                                                                                                                                                            |      |                                                |     |              |               |                                             |        |                                                                                      |  |
|------------------------------------------------------------------------------------------------------------------------------------------------------------------------------------------------------------------|----------------------------------------------------------------------------------------------------------------------------------------------------------------------------|------|------------------------------------------------|-----|--------------|---------------|---------------------------------------------|--------|--------------------------------------------------------------------------------------|--|
| integration triangle (FFC-al-EIT) intervention on residents and facilities                                                                                                                                       |                                                                                                                                                                            |      | GERIATRICS SOCIETY                             |     |              |               |                                             |        |                                                                                      |  |
| Impact of implementation of a novel antimicrobial stewardship tool on antibiotic use in nursing homes: a prospective cluster randomized control pilot study                                                      | Fleet, E.; Gopal Rao, G.; Patel, B.; Cookson, B.; Charlett, A.; Bowman, C.; Davey, P.                                                                                      | 2014 | J Antimicrob Chemother                         | 69  | 8            | 2265-73       | 10.1093/jac/dku115                          | #15964 | Exclusion reason: Wrong outcomes (not related to behaviour/clinical practice)        |  |
| Impact of information letters on the reporting rate of adverse drug reactions and the quality of the reports: a randomized controlled study                                                                      | Johansson, M. L.; Hagg, S.; Wallerstedt, S. M.                                                                                                                             | 2011 | BMC Clin Pharmacol                             | 11  |              | 14            | 10.1186/1472-6904-11-14                     | #6678  | Exclusion reason: Wrong population (not nurses)                                      |  |
| Impact of interact implementation on nursing home resident safety                                                                                                                                                | Tappen, R.; Engstrom, G.; Ouslander, J.                                                                                                                                    | 2014 | Journal of the American Geriatrics Society     | 62  | SUPPL. 1     | S143          | http://dx.doi.org/10.1111/jgs.12870         | #15278 | Exclusion reason: Wrong type of paper (not a research article)                       |  |
| Impact of interprofessional education about psychological and medical comorbidities on practitioners' knowledge and collaborative practice: mixed method evaluation of a national program                        | Phillips, C. B.; Hall, S.; Irving, M.                                                                                                                                      | 2016 | BMC Health Services Research                   | 16  |              | 465           | http://dx.doi.org/10.1186/s12913-016-1720-z | #13409 | Exclusion reason: Wrong study design (not a RCT or a nonrandomized controlled study) |  |
| Impact of nursing education on clinical practice                                                                                                                                                                 | Tarsis, H. H.                                                                                                                                                              | 2014 | Nurs J India                                   | 105 | 1            | 10-Aug        |                                             | #15277 | Exclusion reason: Wrong population (not nurses)                                      |  |
| Impact of Nursing Home Palliative Care Teams on End-of-Life Outcomes: A Randomized Controlled Trial                                                                                                              | Temkin-Greener, H.; Mukamel, D. B.; Ladd, H.; Ladwig, S.; Caprio, T. V.; Norton, S. A.; Quill, T. E.; Olsan, T. H.; Cai, X.                                                | 2018 | Med Care                                       | 56  | 1            | 18-Nov        | 10.1097/mlr.0000000000000835                | #11041 | Exclusion reason: Wrong study design (not a RCT or a nonrandomized controlled study) |  |
| Impact of person-centred care training and person-centred activities on quality of life, agitation, and antipsychotic use in people with dementia living in nursing homes: A cluster-randomised controlled trial | Ballard, C.; Corbett, A.; Orrell, M.; Williams, G.; Moniz-Cook, E.; Romeo, R.; Woods, B.; Garrod, L.; Testad, I.; Woodward-Carlton, B.; Wenborn, J.; Knapp, M.; Fossey, J. | 2018 | PLoS Med                                       | 15  | 2            | e1002500      | 10.1371/journal.pmed.1002500                | #12662 | Exclusion reason: Wrong population (not nurses)                                      |  |
| Impact of psychologically tailored hand hygiene interventions on nosocomial infections with multidrug-resistant organisms: results of the cluster-randomized controlled trial PSYGIENE                           | von Lengerke, T.; Ebadi, E.; Schock, B.; Krauth, C.; Lange, K.; Stahmeyer, J. T.; Chaberny, I. F.                                                                          | 2019 | Antimicrobial Resistance and Infection Control | 8   |              | 11            | 10.1186/s13756-019-0507-5                   | #10732 | Exclusion reason: Wrong population (not nurses)                                      |  |
| Impact of training dementia caregivers in sensitivity to nonverbal emotion signals                                                                                                                               | Magai, C.; Cohen, C. I.; Gomberg, D.                                                                                                                                       | 2002 | Int Psychogeriatr                              | 14  | 1            | 25-38         |                                             | #2581  | Exclusion reason: Wrong population (not nurses)                                      |  |
| IMPACT: Effects of an Online Capacity-Building Intervention for IPV Prevention Professionals                                                                                                                     | Drabkin, Anya S.; Baden, Lucy; Solomon, Julie; Card, Josefina J.                                                                                                           | 2021 | JOURNAL OF INTERPERSONAL VIOLENCE              | 36  | 15/16        | NP7899-NP7919 | 10.1177/0886260519838498                    | #20346 | Exclusion reason: Wrong population (not nurses)                                      |  |
| Implementation and evaluation of an education programme for nursing staff on recognising, reporting and managing resident-to-resident elder mistreatment in aged care facilities                                 | Ellis, J. M.; Ayala Quintanilla, B. P.; Ward, L.; Campbell, F.                                                                                                             | 2019 | Journal of Advanced Nursing                    | 75  | 1            | 187-196       | http://dx.doi.org/10.1111/jan.13819         | #11292 | Exclusion reason: Wrong type of paper (not a research article)                       |  |
| Implementation and evaluation of the '5As of obesity management' in primary care: Results from the 5As team (5AsT) study                                                                                         | Campbell-Scherer, D.; Asselin, J.; Osunlana, A.; Ogunleye, A.; Fielding, S.; Anderson, R.; Cave, A.; Johnson, J.; Sharma, A.                                               | 2017 | Obesity Facts                                  | 10  | Supplement 1 | 185-186       | http://dx.doi.org/10.1159/000468958         | #12868 | Exclusion reason: Wrong type of paper (not a research article)                       |  |

#### Additional file 4. Excluded articles at full text assessment stage and reasons for exclusion.

|                                                                                                                                                                               |                                                                                                                                                                                                             |      |                                                       |     |              |               |                                                        |        |                                                                                      |
|-------------------------------------------------------------------------------------------------------------------------------------------------------------------------------|-------------------------------------------------------------------------------------------------------------------------------------------------------------------------------------------------------------|------|-------------------------------------------------------|-----|--------------|---------------|--------------------------------------------------------|--------|--------------------------------------------------------------------------------------|
| Implementation and initial evaluation of a Web-based nurse order entry system for multidrug-resistant tuberculosis patients in Peru                                           | Choi, S. S.; Jazayeri, D. G.; Mitnick, C. D.; Chalco, K.; Bayona, J.; Fraser, H. S.                                                                                                                         | 2004 | Stud Health Technol Inform                            | 107 | Pt 1         | 202-6         |                                                        | #1068  | Exclusion reason: Wrong intervention (not an implementation intervention)            |
| Implementation of a multifaceted nurse-led intervention to reduce indwelling urinary catheter use in four Australian hospitals: A pre- and postintervention study             | Giles, Michelle; Graham, Laura; Ball, Jean; King, Jennie; Watts, Wendy; Harris, Alison; Oldmeadow, Christopher; Ling, Rod; Paul, Michelle; O'Brien, Anthony; Parker, Vicki; Wiggers, John; Foureur, Maralyn | 2020 | Journal of Clinical Nursing (John Wiley & Sons, Inc.) | 29  | 06-May       | 872-886       | 10.1111/jocn.15142                                     | #18370 | Exclusion reason: Wrong study design (not a RCT or a nonrandomized controlled study) |
| Implementation of a nurse-driven ventilation weaning protocol in critically ill children: Can it improve patient outcome?                                                     | Duynham, A.; Houmes, R. J.; van Rosmalen, J.; Tibboel, D.; van Dijk, M.; Ista, E.                                                                                                                           | 2020 | Australian Critical Care                              | 33  | 1            | 80-88         | 10.1016/j.aucc.2019.01.005                             | #18440 | Exclusion reason: Wrong study design (not a RCT or a nonrandomized controlled study) |
| Implementation of a nurse-led behaviour change intervention to support medication taking in type 2 diabetes: beyond hypothesised active ingredients (SAMS Consultation Study) | Hardeman, W.; Lamming, L.; Kellar, I.; De Simoni, A.; Graffy, J.; Boase, S.; Sutton, S.; Farmer, A.; Kinmonth, A. L.                                                                                        | 2014 | Implement Sci                                         | 9   |              | 70            | 10.1186/1748-5908-9-70                                 | #15869 | Exclusion reason: Wrong study design (not a RCT or a nonrandomized controlled study) |
| Implementation of a protocol for integrated management of pain, agitation, and delirium can improve clinical outcomes in the intensive care unit: a randomized clinical trial | Mansouri, P.; Javadpour, S.; Zand, F.; Ghodsbin, F.; Sabetian, G.; Masjedi, M.; Tabatabaee, H. R.                                                                                                           | 2013 | J Crit Care                                           | 28  | 6            | 918-22        | 10.1016/j.jcrc.2013.06.019                             | #16984 | Exclusion reason: Wrong population (not nurses)                                      |
| Implementation of an Evidence-Based Guideline of Enteral Nutrition for Infants With Congenital Heart Disease: A Controlled Before-and-After Study*                            | Gu, Y.; Hu, Y.; Zhang, H. W.; Fu, W. J.; Yang, Y. X.; Latour, J. M.                                                                                                                                         | 2020 | Pediatric Critical Care Medicine                      | 21  | 6            | E369-E377     | 10.1097/pcc.0000000000002296                           | #18315 | Exclusion reason: Wrong study design (not a RCT or a nonrandomized controlled study) |
| Implementation of an innovative hands-on training to improve adherence to hygiene rules: A feasibility Study                                                                  | Stock, S.; Tebest, R.; Westermann, K.; Samel, C.; Strohbucker, B.; Stosch, C.; Wenchel, H. M.; Redaelli, M.                                                                                                 | 2016 | Nurse Education Today                                 | 36  |              | 407-411       | 10.1016/j.nedt.2015.10.012                             | #13304 | Exclusion reason: Wrong study design (not a RCT or a nonrandomized controlled study) |
| Implementation of an Oral Care Protocol for Primary Diabetes Care: A Pilot Cluster-Randomized Controlled Trial                                                                | Verhulst, M. J. L.; Teeuw, W. J.; Gerdes, V. E. A.; Loos, B. G.                                                                                                                                             | 2021 | Ann Fam Med                                           | 19  | 3            | 197-206       | 10.1370/afm.2645                                       | #22347 | Exclusion reason: Wrong population (not nurses)                                      |
| Implementation of cancer pain guidelines by acute care nurse practitioners using an audit and feedback strategy                                                               | Dulko, D.; Hertz, E.; Julien, J.; Beck, S.; Mooney, K.                                                                                                                                                      | 2010 | J Am Acad Nurse Pract                                 | 22  | 1            | 45-55         | 10.1111/j.1745-7599.2009.00469.x                       | #7568  | Exclusion reason: Wrong study design (not a RCT or a nonrandomized controlled study) |
| Implementation of cytospongetm device training for nurses in primary care                                                                                                     | Beecham, I. D.; Alias, B.; Nuckcheddy, T.; Bowers, B.; Murray, L.; Wilson, A.; Muldrew, B.; Khan, Z.; O'Donovan, M.; MacRae, S.; Sasieni, P.; Fitzgerald, R.                                                | 2018 | Gut                                                   | 67  | Supplement 1 | A269          | http://dx.doi.org/10.1136/gutjnl-2018-BSGAbstracts.525 | #11848 | Exclusion reason: Wrong type of paper (not a research article)                       |
| Implementation of evidence-based preventive services delivery processes in primary care: an Oklahoma Physicians Resource/Research Network (OKPRN) study                       | Mold, J. W.; Aspy, C. A.; Nagykaldi, Z.                                                                                                                                                                     | 2008 | J Am Board Fam Med                                    | 21  | 4            | 334-44        | 10.3122/jabfm.2008.04.080006                           | #8944  | Exclusion reason: Wrong population (not nurses)                                      |
| Implementation of the champions for skin integrity model to improve leg and foot                                                                                              | Parker, Chrisina N.; Shuter, Patricia; Maresco, & Pennisi, Diane; Sargent,                                                                                                                                  | 2019 | Journal of Clinical Nursing                           |     |              | No Pagination | 10.1111/jocn.14826                                     | #10808 | Exclusion reason: Wrong population (not nurses)                                      |



#### Additional file 4. Excluded articles at full text assessment stage and reasons for exclusion.

|                                                                                                                                                                                                     |                                                                                                                                                                         |      |                                                    |                   |          |                                                 |                                                                                                       |        |                                                                                      |
|-----------------------------------------------------------------------------------------------------------------------------------------------------------------------------------------------------|-------------------------------------------------------------------------------------------------------------------------------------------------------------------------|------|----------------------------------------------------|-------------------|----------|-------------------------------------------------|-------------------------------------------------------------------------------------------------------|--------|--------------------------------------------------------------------------------------|
| ulcer care in the primary healthcare setting                                                                                                                                                        | Jodie; Collins, Lou; Edwards, Helen E.; Finlayson, Kathleen J.                                                                                                          |      |                                                    |                   |          | Specified-No<br>Paginat<br>ion<br>Specifi<br>ed |                                                                                                       |        |                                                                                      |
| Implementation of the dutch clinical practice guideline pain in patients with cancer: A clustered randomised controlled trial with short message service (SMS) and interactive voice response (IVR) | Te Bovelde, N. D.; Engels, Y.; Besse, T. C.; Vissers, K. C. P.; Vernooij-Dassen, M. J. F. J.                                                                            | 2012 | Palliative Medicine                                | 26                | 4        | 455-456                                         | <a href="http://dx.doi.org/10.1177/0269216312446391">http://dx.doi.org/10.1177/0269216312446391</a>   | #17116 | Exclusion reason: Wrong type of paper (not a research article)                       |
| Implementation of the evidence review on best practice for confirming the correct placement of nasogastric tube in patients in an acute care hospital                                               | Tho, Poh Chi; Mordiffi, Siti; Ang, Emily; Chen, Helen                                                                                                                   | 2011 | International Journal of Evidence-Based Healthcare | 9                 | 1        | 51-60                                           | 10.1111/j.1744-1609.2010.00200.x                                                                      | #6245  | Exclusion reason: Wrong study design (not a RCT or a nonrandomized controlled study) |
| Implementing a nursing symptom self-management intervention: The Symptom Navi Program                                                                                                               | Bana, M.; Ribi, K.; Kropf-Staub, S.; Zurcher-Florin, S.; Naf, E.; Blauer, C.; Borner, M.; Cantoni, N.; Seeger, T.; Betticher, D.; Butikofer, L.; Peters, S.; Eicher, M. | 2020 | Annals of Oncology                                 | 31 (Supplement 4) |          | S1138                                           |                                                                                                       | #19428 | Exclusion reason: Wrong type of paper (not a research article)                       |
| Implementing a Pilot Trial of an Infection Control Program in Nursing Homes: Results of a Matched Cluster Randomized Trial                                                                          | McConeghy, K. W.; Baier, R.; McGrath, K. P.; Baer, C. J.; Mor, V.                                                                                                       | 2017 | J Am Med Dir Assoc                                 | 18                | 8        | 707-712                                         | 10.1016/j.jamd.2017.03.003                                                                            | #11918 | Exclusion reason: Wrong population (not nurses)                                      |
| Implementing a Standardized Communication Tool in an Intensive Care Unit                                                                                                                            | Murphy, M.; Engel, J. R.; McGugan, L.; McKenzie, R.; Thompson, J. A.; Turner, K. M.                                                                                     | 2022 | CRITICAL CARE NURSE                                | 42                | 3        | 56+                                             | 10.4037/ccn2022154                                                                                    | #21518 | Exclusion reason: Wrong study design (not a RCT or a nonrandomized controlled study) |
| Implementing collaborative care for depression treatment in primary care: a cluster randomized evaluation of a quality improvement practice redesign                                                | Chaney, E. F.; Rubenstein, L. V.; Liu, C. F.; Yano, E. M.; Bolkan, C.; Lee, M.; Simon, B.; Lanto, A.; Felker, B.; Uman, J.                                              | 2011 | Implement Sci                                      | 6                 |          | 121                                             | 10.1186/1748-5908-6-121                                                                               | #7383  | Exclusion reason: Wrong population (not nurses)                                      |
| Implementing distress management guidelines in ambulatory oncology: A quality improvement project                                                                                                   | Hammelef, Karen J.; Friese, Christopher R.; Breslin, Tara M.; Riba, Michelle; Schneider, Susan M.                                                                       | 2014 | Clinical Journal of Oncology Nursing               | 18                | 1, Suppl | 31-36                                           | 10.1188/14.CJON.S1.31-36                                                                              | #15876 | Exclusion reason: Wrong study design (not a RCT or a nonrandomized controlled study) |
| Implementing evidence-based practice: effectiveness of a structured multifaceted mentorship programme                                                                                               | Wallen, G. R.; Mitchell, S. A.; Melnyk, B.; Fineout, Overholt, E.; Miller, Davis, C.; Yates, J.; Hastings, C.                                                           | 2010 | Journal of Advanced Nursing                        | 66                | 12       | 2761-2771                                       | 10.1111/j.1365-2648.2010.05442.x                                                                      | #17376 | Exclusion reason: Wrong population (not nurses)                                      |
| Implementing family services at mental health clinics                                                                                                                                               | Cohen, A.; Glynn, S.; Young, A.; Hamilton, A.                                                                                                                           | 2010 | Journal of General Internal Medicine               | 25                | SUPPL. 3 | S305-S306                                       | <a href="http://dx.doi.org/10.1007/s11606-010-1338-5">http://dx.doi.org/10.1007/s11606-010-1338-5</a> | #7754  | Exclusion reason: Wrong type of paper (not a research article)                       |
| Implementing guidelines for smoking cessation: comparing the efforts of nurses and medical assistants                                                                                               | Katz, D. A.; Brown, R. B.; Muehlenbruch, D. R.; Fiore, M. C.; Baker, T. B.                                                                                              | 2004 | Am J Prev Med                                      | 27                | 5        | 411-6                                           | 10.1016/j.amepre.2004.07.015                                                                          | #1496  | Exclusion reason: Wrong study design (not a RCT or a nonrandomized controlled study) |
| Implementing guidelines to routinely prevent chronic vascular disease in primary care: the Preventive Evidence                                                                                      | Harris, M. F.; Parker, S. M.; Litt, J.; van Driel, M.; Russell, G.; Mazza, D.; Jayasinghe, U. W.; Del Mar, C.; Lloyd,                                                   | 2015 | BMJ Open                                           | 5                 | 12       | e009397                                         | 10.1136/bmjopen-2015-009397                                                                           | #14954 | Exclusion reason: Wrong population (not nurses)                                      |

#### Additional file 4. Excluded articles at full text assessment stage and reasons for exclusion.

|                                                                                                                                                 |                                                                                                                                                                                                                       |      |                                                 |     |             |                                                                             |                                                 |        |                                                                                      |
|-------------------------------------------------------------------------------------------------------------------------------------------------|-----------------------------------------------------------------------------------------------------------------------------------------------------------------------------------------------------------------------|------|-------------------------------------------------|-----|-------------|-----------------------------------------------------------------------------|-------------------------------------------------|--------|--------------------------------------------------------------------------------------|
| into Practice cluster randomised controlled trial                                                                                               | J.; Smith, J.; Zwar, N.; Taylor, R.; Powell Davies, G.                                                                                                                                                                |      |                                                 |     |             |                                                                             |                                                 |        |                                                                                      |
| Implementing mandatory early warning scoring impacts nurses, Æ practice of documenting free text notes                                          | Bunkenborg, Gitte; Smith, Æ Hansen, Lars; Poulsen, Ingrid                                                                                                                                                             | 2019 | Journal of Clinical Nursing                     |     |             | No<br>Paginat<br>ion<br>Specifi<br>ed-No<br>Paginat<br>ion<br>Specifi<br>ed | 10.1111/jocn.14870                              | #11333 | Exclusion reason: Wrong study design (not a RCT or a nonrandomized controlled study) |
| Implementing Motivational Interviewing for Substance Misuse on Medical Inpatient Units: a Randomized Controlled Trial                           | Martino, S.; Zimbrea, P.; Forray, A.; Kaufman, J. S.; Desan, P. H.; Olmstead, T. A.; Gilstad-Hayden, K.; Gueorguieva, R.; Yonkers, K. A.                                                                              | 2019 | J Gen Intern Med                                | 34  | 11          | 2520-2529                                                                   | 10.1007/s11606-019-05257-3                      | #18626 | Exclusion reason: Wrong population (not nurses)                                      |
| Implementing osteoarthritis guidelines in UK primary care: Mosaics cluster randomised controlled trial                                          | Dziedzic, K.                                                                                                                                                                                                          | 2015 | Osteoarthritis and Cartilage                    | 23  | SUPPL. 2    | A30                                                                         |                                                 | #15473 | Exclusion reason: Wrong type of paper (not a research article)                       |
| Implementing practice guides to improve cancer symptom management in homecare: A comparative case study                                         | Stacey, Dawn; Ludwig, Claire; Truant, Tracy; Carley, Meg; Bennis, Cindy; Gifford, Wendy; Kuziemsy, Craig; Nichol, Kathryn; Lafreniere-Davis, Nicole; Owens, Glenda; Roscoe, Diane; Roberts, Pamela; Verhaegen, Melina | 2019 | Home Health Care Management & Practice          | 31  | 3           | 139-146                                                                     | 10.1177/1084822318817896                        | #17754 | Exclusion reason: Wrong study design (not a RCT or a nonrandomized controlled study) |
| Implementing referral to an electronic alcohol brief advice website in primary healthcare: results from the ODHIN implementation trial          | Bendtsen, P.; Mussener, U.; Karlsson, N.; Lopez-Pelayo, H.; Palacio-Vieira, J.; Colom, J.; Gual, A.; Reynolds, J.; Wallace, P.; Segura, L.; Anderson, P.                                                              | 2016 | BMJ Open                                        | 6   | 6           | e010271                                                                     | 10.1136/bmjopen-2015-010271                     | #14698 | Exclusion reason: Wrong population (not nurses)                                      |
| Implementing the Dynamic Appraisal of Situational Aggression in Mental Health Units                                                             | Lantta, T.; Daffern, M.; Kontio, R.; Valimaki, M.                                                                                                                                                                     | 2015 | Clinical Nurse Specialist                       | 29  | 4           | 230-243                                                                     | 10.1097/nur.0000000000000140                    | #15232 | Exclusion reason: Wrong study design (not a RCT or a nonrandomized controlled study) |
| Improved cardiovascular prevention using best CME practices: a randomized trial                                                                 | Laprise, R.; Thivierge, R.; Gosselin, G.; Bujas-Bobanovic, M.; Vandal, S.; Paquette, D.; Luneau, M.; Julien, P.; Goulet, S.; Desaulniers, J.; Maltais, P.                                                             | 2009 | J Contin Educ Health Prof                       | 29  | 1           | 16-31                                                                       | 10.1002/chp.20002                               | #8168  | Exclusion reason: Wrong population (not nurses)                                      |
| Improved detection of incident HIV infection and uptake of PMTCT services in labor and delivery in a high HIV prevalence setting                | Kieffer, M. P.; Nhlabatsi, B.; Mahdi, M.; Hoffman, H. J.; Kudiabor, K.; Wilfert, C. M.                                                                                                                                | 2011 | J Acquir Immune Defic Syndr                     | 57  | 4           | e85-91                                                                      | 10.1097/QAI.0b013e31821acc6e                    | #6453  | Exclusion reason: Wrong population (not nurses)                                      |
| Improved electrocardiographic monitoring practices in the practical use of the latest standards of electrocardiography (PULSE) trial            | Funk, M.; Fennie, K. P.; May, J. L.; Stephens, K.; Feder, S. L.; Chang, P. S.; Drew, B. J.                                                                                                                            | 2013 | Circulation                                     | 128 | 22 SUPPL. 1 |                                                                             |                                                 | #16815 | Exclusion reason: Wrong type of paper (not a research article)                       |
| Improved HIV and TB Knowledge and Competence among Mid-level Providers in a Cluster-Randomized Trial of One-on-One Mentorship for Task Shifting | Naikoba, S.; Senjovu, K. D.; Mugabe, P.; McCarthy, C. F.; Riley, P. L.; Kadengye, D. T.; Dalal, S.                                                                                                                    | 2017 | Journal of Acquired Immune Deficiency Syndromes | 75  | 5           | e120-e127                                                                   | http://dx.doi.org/10.1097/QAI.00000000000001378 | #11854 | Exclusion reason: Wrong population (not nurses)                                      |
| Improved quality of nursing documentation: results of a nursing                                                                                 | Muller-Staub, M.; Needham, I.; Odenbreit, M.; Lavin, M. A.; van Achterberg, T.                                                                                                                                        | 2007 | Int J Nurs Terminol Classif                     | 18  | 1           | 17-May                                                                      | 10.1111/j.1744-                                 | #9660  | Exclusion reason: Wrong study design (not a RCT                                      |

#### Additional file 4. Excluded articles at full text assessment stage and reasons for exclusion.

|                                                                                                                                                                    |                                                                                                                                                                                                                   |      |                                        |     |       |           |                                  |        |                                                                                      |
|--------------------------------------------------------------------------------------------------------------------------------------------------------------------|-------------------------------------------------------------------------------------------------------------------------------------------------------------------------------------------------------------------|------|----------------------------------------|-----|-------|-----------|----------------------------------|--------|--------------------------------------------------------------------------------------|
| diagnoses, interventions, and outcomes implementation study                                                                                                        |                                                                                                                                                                                                                   |      |                                        |     |       |           | 618X.2007.00043.x                |        | or a nonrandomized controlled study)                                                 |
| Improvement in provider immunization knowledge and behaviors following a peer education intervention                                                               | Boom, J. A.; Nelson, C. S.; Laufman, L. E.; Kohrt, A. E.; Kozinetz, C. A.                                                                                                                                         | 2007 | Clin Pediatr (Phila)                   | 46  | 8     | 706-17    | 10.1177/0009922807301484         | #9790  | Exclusion reason: Wrong study design (not a RCT or a nonrandomized controlled study) |
| Improvement of drug dose calculations by classroom teaching or e-learning: a randomised controlled trial in nurses                                                 | Simonsen, B. O.; Daehlin, G. K.; Johansson, I.; Farup, P. G.                                                                                                                                                      | 2014 | BMJ Open                               | 4   | 10    | e006025   | 10.1136/bmjopen-2014-006025      | #15326 | Exclusion reason: Wrong outcomes (not related to behaviour/clinical practice)        |
| Improvement of Iranian nurses' competence through professional portfolio: a quasi-experimental study                                                               | Bahreini, M.; Moattari, M.; Shahamat, S.; Dobaradaran, S.; Ravanipour, M.                                                                                                                                         | 2013 | Nurs Health Sci                        | 15  | 1     | Jul-51    | 10.1111/j.1442-2018.2012.00733.x | #16931 | Exclusion reason: Wrong intervention (not an implementation intervention)            |
| Improving adherence to guidelines for hypertension drug prescribing: cluster-randomized controlled trial of general versus patient-specific recommendations        | Goldstein, M. K.; Lavori, P.; Coleman, R.; Advani, A.; Hoffman, B. B.                                                                                                                                             | 2005 | Am J Manag Care                        | 11  | 11    | 677-85    |                                  | #1024  | Exclusion reason: Wrong population (not nurses)                                      |
| Improving Adherence to Long-term Opioid Therapy Guidelines to Reduce Opioid Misuse in Primary Care: A Cluster-Randomized Clinical Trial                            | Liebschutz, J. M.; Xuan, Z.; Shanahan, C. W.; LaRochelle, M.; Keosaian, J.; Beers, D.; Guara, G.; O'Connor, K.; Alford, D. P.; Parker, V.; Weiss, R. D.; Samet, J. H.; Crosson, J.; Cushman, P. A.; Lasser, K. E. | 2017 | JAMA Intern Med                        | 177 | 9     | 1265-1272 | 10.1001/jamainternmed.2017.2468  | #12029 | Exclusion reason: Wrong population (not nurses)                                      |
| Improving cancer pain management in communities: Main results from a randomized controlled trial                                                                   | Elliott, T. E.; Murray, D. M.; Oken, M. M.; Johnson, K. M.; Braun, B. L.; Elliott, B. A.; PostWhite, J.                                                                                                           | 1997 | Journal of Pain and Symptom Management | 13  | 4     | 191-203   | 10.1016/s0885-3924(96)00275-8    | #4413  | Exclusion reason: Wrong population (not nurses)                                      |
| Improving care for minorities: can quality improvement interventions improve care and outcomes for depressed minorities? Results of a randomized, controlled trial | Miranda, J.; Duan, N.; Sherbourne, C.; Schoenbaum, M.; Lagomasino, I.; Jackson-Triche, M.; Wells, K. B.                                                                                                           | 2003 | Health Serv Res                        | 38  | 2     | 613-30    |                                  | #2011  | Exclusion reason: Wrong population (not nurses)                                      |
| Improving clinician self-efficacy does not increase asthma guideline use by primary care clinicians                                                                | Cloutier, M. M.; Tennen, H.; Wakefield, D. B.; Brazil, K.; Hall, C. B.                                                                                                                                            | 2012 | Acad Pediatr                           | 12  | 4     | 312-8     | 10.1016/j.acap.2012.04.004       | #6474  | Exclusion reason: Wrong population (not nurses)                                      |
| Improving comfort around dying in elderly people: a cluster randomised controlled trial                                                                            | Beernaert, K.; Smets, T.; Cohen, J.; Verhofstede, R.; Costantini, M.; Eecloo, K.; Van Den Noortgate, N.; Deliens, L.                                                                                              | 2017 | Lancet                                 | 390 | 10090 | 125-134   | 10.1016/s0140-6736(17)31265-5    | #12935 | Exclusion reason: Wrong population (not nurses)                                      |
| Improving Geriatric Care Processes on Two Medical-Surgical Acute Care Units: A Pilot Study                                                                         | Booth, K. A.; Simmons, E. E.; Viles, A. F.; Gray, W. A.; Kennedy, K. R.; Biswal, S. H.; Lowe, J. A.; Xhaja, A.; Kennedy, R. E.; Brown, C. J.; Flood, K. L.                                                        | 2019 | Journal for Healthcare Quality         | 41  | 1     | 23-31     | 10.1097/jhq.000000000000140      | #19348 | Exclusion reason: Wrong study design (not a RCT or a nonrandomized controlled study) |
| Improving hand hygiene adherence among nursing staff                                                                                                               | Harne-Britner, S.; Allen, M.; Fowler, K. A.                                                                                                                                                                       | 2011 | J Nurs Care Qual                       | 26  | 1     | 39-48     | 10.1097/NCQ.0b013e3181e0575f     | #6728  | Exclusion reason: Wrong population (not nurses)                                      |
| Improving nurses' knowledge, attitude, and performance in relation to ethical codes through group reflection strategy                                              | Momennasab, Marzieh; Ghanbari, Marjan; Rivaz, Mozghan                                                                                                                                                             | 2021 | BMC NURSING                            | 20  | 1     | 09-Jan    | 10.1186/s12912-021-00749-2       | #21460 | Exclusion reason: Wrong outcomes (not related to behaviour/clinical practice)        |
| Improving nursing practice with staff education: the challenges of dysphagia                                                                                       | Hansel, D. E.; Heinemann, D.                                                                                                                                                                                      | 1996 | Gastroenterol Nurs                     | 19  | 6     | 201-6     |                                  | #4219  | Exclusion reason: Wrong population (not nurses)                                      |

#### Additional file 4. Excluded articles at full text assessment stage and reasons for exclusion.

|                                                                                                                                                    |                                                                                                                                                                                                                                                       |      |                               |     |    |               |                                                 |        |                                                                               |
|----------------------------------------------------------------------------------------------------------------------------------------------------|-------------------------------------------------------------------------------------------------------------------------------------------------------------------------------------------------------------------------------------------------------|------|-------------------------------|-----|----|---------------|-------------------------------------------------|--------|-------------------------------------------------------------------------------|
| Improving oral health in nursing home residents: A cluster randomized trial of a shared oral care intervention                                     | Overgaard, C.; Bv[ ]ggild, H.; Hede, B.; Bagger, M.; Hartmann, L. G.; Aagaard, K.                                                                                                                                                                     | 2022 | Community Dent Oral Epidemiol | 50  | 2  | 115-123       | 10.1111/cdoe.12638                              | #21641 | Exclusion reason: Wrong population (not nurses)                               |
| Improving outcomes of nursing home interactions                                                                                                    | Williams, K. N.                                                                                                                                                                                                                                       | 2006 | Res Nurs Health               | 29  | 2  | 121-33        | 10.1002/nur.20117                               | #9980  | Exclusion reason: Wrong population (not nurses)                               |
| Improving quality of delirium care in a general medical service with established interdisciplinary care: a controlled trial                        | Mudge, A. M.; Maussen, C.; Duncan, J.; Denaro, C. P.                                                                                                                                                                                                  | 2013 | Intern Med J                  | 43  | 3  | 270-7         | 10.1111/j.1445-5994.2012.02840.x                | #16569 | Exclusion reason: Wrong population (not nurses)                               |
| Improving rates of pneumococcal vaccination on discharge from a tertiary center medical teaching unit: a prospective intervention                  | Thomas, C. M.; Loewen, A.; Coffin, C.; Campbell, N. R.                                                                                                                                                                                                | 2005 | BMC Public Health             | 5   |    | 110           | 10.1186/1471-2458-5-110                         | #376   | Exclusion reason: Wrong intervention (not an implementation intervention)     |
| Improving resident outcomes with GAPN organization level interventions                                                                             | Krichbaum, K.; Pearson, V.; Savik, K.; Mueller, C.                                                                                                                                                                                                    | 2005 | West J Nurs Res               | 27  | 3  | 322-37        | 10.1177/0193945904270300                        | #612   | Exclusion reason: Wrong intervention (not an implementation intervention)     |
| Improving smoking cessation care in pregnancy at Aboriginal Medical Services: ICAN QUIT in Pregnancy' step-wedge cluster randomised study          | Bar-Zeev, Y.; Bovill, M.; Bonevski, B.; Gruppetta, M.; Oldmeadow, C.; Palazzi, K.; Atkins, L.; Reath, J.; Gould, G. S.                                                                                                                                | 2019 | BMJ Open                      | 9   | 6  |               |                                                 | #19426 | Exclusion reason: Wrong population (not nurses)                               |
| Improving the care for depression in patients with comorbid medical illness                                                                        | Koike, A. K.; Unutzer, J.; Wells, K. B.                                                                                                                                                                                                               | 2002 | Am J Psychiatry               | 159 | 10 | 1738-45       | 10.1176/appi.aip.159.10.1738                    | #3020  | Exclusion reason: Wrong population (not nurses)                               |
| Improving the Delivery of Chronic Opioid Therapy Among People Living With Human Immunodeficiency Virus: A Cluster Randomized Clinical Trial        | Samet, J. H.; Tsui, J. I.; Cheng, D. M.; Liebschutz, J. M.; Lira, M. C.; Walley, A. Y.; Colasanti, J. A.; Forman, L. S.; Root, C.; Shanahan, C. W.; Sullivan, M. M.; Briden, C. L.; Abrams, C.; Harris, C.; Outlaw, K.; Armstrong, W. S.; Del Rio, C. | 2021 | Clin Infect Dis               | 73  | 7  | e2052-e2058   | 10.1093/cid/ciaa1025                            | #21937 | Exclusion reason: Wrong population (not nurses)                               |
| Improving the knowledge of labour and delivery nurses in India: a randomized controlled trial of mentoring and case sheets in primary care centres | Bradley, J.; Jayanna, K.; Shaw, S.; Cunningham, T.; Fischer, E.; Mony, P.; Ramesh, B. M.; Moses, S.; Avery, L.; Crockett, M.; Blanchard, J. F.                                                                                                        | 2017 | BMC Health Serv Res           | 17  | 1  | 14            | 10.1186/s12913-016-1933-1                       | #12894 | Exclusion reason: Wrong outcomes (not related to behaviour/clinical practice) |
| Improving the quality of nurse clinical documentation for chronic patients at primary care clinics: A multifaceted intervention                    | Mahomed, O. H.; Naidoo, S.; Asmall, S.; Taylor, M.                                                                                                                                                                                                    | 2015 | Curationis                    | 38  | 1  |               | http://dx.doi.org/10.4102/curationis.v38i1.1497 | #14821 | Exclusion reason: Wrong population (not nurses)                               |
| Improving the referral process for familial breast cancer genetic counselling: findings of three randomised controlled trials of two interventions | Wilson, B. J.; Torrance, N.; Mollison, J.; Wordsworth, S.; Gray, J. R.; Haites, N. E.; Grant, A.; Campbell, M. K.; Miedzybrodzka, Z.; Clarke, A.; Watson, M. S.; Douglas, A.                                                                          | 2005 | Health Technol Assess         | 9   | 3  | iii-iv, 1-126 |                                                 | #318   | Exclusion reason: Wrong population (not nurses)                               |
| Improving use of targeted temperature management after out-of-hospital cardiac arrest: a stepped wedge cluster randomized controlled trial         | Morrison, L. J.; Brooks, S. C.; Dainty, K. N.; Dorian, P.; Needham, D. M.; Ferguson, N. D.; Rubenfeld, G. D.; Slutsky, A. S.; Wax, R. S.; Zwarenstein, M.; Thorpe, K.; Zhan, C.; Scales, D. C.                                                        | 2015 | Crit Care Med                 | 43  | 5  | 954-64        | 10.1097/ccm.0000000000000864                    | #14772 | Exclusion reason: Wrong population (not nurses)                               |
| Increasing preventive care by primary care nursing and allied health clinicians: a non-randomized controlled trial                                 | McElwaine, K. M.; Freund, M.; Campbell, E. M.; Knight, J.; Bowman, J. A.; Wolfenden, L.; McElduff, P.;                                                                                                                                                | 2014 | Am J Prev Med                 | 47  | 4  | 424-34        | 10.1016/j.amepre.2014.06.018                    | #15712 | Exclusion reason: Wrong population (not nurses)                               |

#### Additional file 4. Excluded articles at full text assessment stage and reasons for exclusion.

|                                                                                                                                                                                              |                                                                                                                                                                                                                                      |      |                                                                                                       |                    |            |          |                                             |        |                                                                                      |
|----------------------------------------------------------------------------------------------------------------------------------------------------------------------------------------------|--------------------------------------------------------------------------------------------------------------------------------------------------------------------------------------------------------------------------------------|------|-------------------------------------------------------------------------------------------------------|--------------------|------------|----------|---------------------------------------------|--------|--------------------------------------------------------------------------------------|
|                                                                                                                                                                                              | Bartlem, K. M.; Gillham, K. E.; Wiggers, J. H.                                                                                                                                                                                       |      |                                                                                                       |                    |            |          |                                             |        |                                                                                      |
| Increasing smoking cessation care in a preoperative clinic: a randomized controlled trial                                                                                                    | Wolfenden, L.; Wiggers, J.; Knight, J.; Campbell, E.; Spigelman, A.; Kerridge, R.; Moore, K.                                                                                                                                         | 2005 | Prev Med                                                                                              | 41                 | 1          | 284-90   | 10.1016/j.ypmed.2004.11.011                 | #315   | Exclusion reason: Wrong population (not nurses)                                      |
| Insights about the process and impact of implementing nursing guidelines on delivery of care in hospitals and community settings                                                             | Davies, B.; Edwards, N.; Ploeg, J.; Virani, T.                                                                                                                                                                                       | 2008 | BMC Health Services Research                                                                          | 8                  |            | 29-29    |                                             | #9232  | Exclusion reason: Wrong study design (not a RCT or a nonrandomized controlled study) |
| Instructional design affects the efficacy of simulation-based training in central venous catheterization                                                                                     | Craft, C.; Feldon, D. F.; Brown, E. A.                                                                                                                                                                                               | 2014 | Am J Surg                                                                                             | 207                | 5          | 782-9    | 10.1016/j.amjsurg.2013.06.003               | #16430 | Exclusion reason: Wrong intervention (not an implementation intervention)            |
| Integrating screening and interventions for unhealthy behaviors into primary care practices                                                                                                  | Aspy, C. B.; Mold, J. W.; Thompson, D. M.; Blondell, R. D.; Landers, P. S.; Reilly, K. E.; Wright-Eakers, L.                                                                                                                         | 2008 | Am J Prev Med                                                                                         | 35                 | 5 Suppl    | S373-80  | 10.1016/j.amepre.2008.08.015                | #9373  | Exclusion reason: Wrong study design (not a RCT or a nonrandomized controlled study) |
| Integration of a multicomponent intervention for hypertension into primary healthcare services in Singapore-A cluster randomized controlled trial                                            | Jafar, T. H.; Tan, N. C.; Shirore, R. M.; Allen, J. C.; Finkelstein, E. A.; Hwang, S. W.; Koong, A. Y. L.; Moey, P. K. S.; Kang, G. C.; Goh, C. W. T.; Subramanian, R. C.; Thiagarajah, A. G.; Ramakrishnan, C.; Lim, C. W.; Liu, J. | 2022 | PLoS Med                                                                                              | 19                 | 6          | e1004026 | 10.1371/journal.pmed.1004026                | #20828 | Exclusion reason: Wrong population (not nurses)                                      |
| Interactive online education is comparable to inperson training to teach insulin adjustment skills in a low-resource setting: A pilot study with noncommunicable disease providers in Rwanda | Chen, M.; Niyonsenga, S. P.; Rwagasore, E.; Rutagarama, F.; Dudzinski, J.; Wilson, C.; Lyden, E.; Delair, S.                                                                                                                         | 2019 | Pediatric Diabetes                                                                                    | 20 (Supplement 28) |            | 168      |                                             | #19654 | Exclusion reason: Wrong type of paper (not a research article)                       |
| Interactive Spaced Education improves clinicians' screening for prostate cancer: A multi-institutional randomized controlled trial                                                           | Kerfoot, B. P.; Lawler, E. V.; Sokolovskaya, G.; Gagnon, D.; Conlin, P. R.                                                                                                                                                           | 2009 | Journal of Urology                                                                                    | 181                | 4 SUPPL. 1 | 190      |                                             | #8206  | Exclusion reason: Wrong type of paper (not a research article)                       |
| Interdisciplinary Educational Approaches to Promote Team-Based Geriatrics and Palliative Care                                                                                                | Howe, Judith L.; Sherman, Deborah Witt                                                                                                                                                                                               | 2006 | Gerontology & Geriatrics Education                                                                    | 26                 | 3          | 16-Jan   |                                             | #10676 | Exclusion reason: Wrong study design (not a RCT or a nonrandomized controlled study) |
| Intervention Adherence and Self-Efficacy as Predictors of Child Outcomes in School Nurse-Delivered Interventions for Anxiety                                                                 | Caron, E. B.; Drake, K. L.; Stewart, C. E.; Muggeo, M. A.; Ginsburg, G. S.                                                                                                                                                           | 2022 | The Journal of school nursing : the official publication of the National Association of School Nurses | 38                 | 3          | 249-258  | https://dx.doi.org/10.1177/1059840520925522 | #20062 | Exclusion reason: Wrong intervention (not an implementation intervention)            |
| Intervention targeted at nurses to improve venous thromboprophylaxis                                                                                                                         | Labarere, J.; Bosson, J. L.; Sevestre, M. A.; Sellier, E.; Richaud, C.; Legagneux, A.                                                                                                                                                | 2007 | International Journal for Quality in Health Care                                                      | 19                 | 5          | 301-308  | http://dx.doi.org/10.1093/intqhc/mzm034     | #10563 | Exclusion reason: Wrong population (not nurses)                                      |
| Interventions to address deficits of pharmacological pain management in                                                                                                                      | Konner, F.; Budnick, A.; Kuhnert, R.; Wulff, I.; Kalinowski, S.; Martus, P.; Drager, D.; Kreutz, R.                                                                                                                                  | 2015 | Eur J Pain                                                                                            | 19                 | 9          | 1331-41  | 10.1002/ejp.663                             | #15254 | Exclusion reason: Wrong outcomes (not related to                                     |

#### Additional file 4. Excluded articles at full text assessment stage and reasons for exclusion.

|                                                                                                                                                                                                                                                |                                                                                                                                                                     |      |                                            |           |    |           |                                      |        |  |                                                                                      |
|------------------------------------------------------------------------------------------------------------------------------------------------------------------------------------------------------------------------------------------------|---------------------------------------------------------------------------------------------------------------------------------------------------------------------|------|--------------------------------------------|-----------|----|-----------|--------------------------------------|--------|--|--------------------------------------------------------------------------------------|
| nursing home residents--A cluster-randomized trial                                                                                                                                                                                             |                                                                                                                                                                     |      |                                            |           |    |           |                                      |        |  | behaviour/clinical practice)                                                         |
| Introduction of a comprehensive management protocol for severe sepsis is associated with sustained improvements in timeliness of care and survival                                                                                             | MacRedmond, R.; Hollohan, K.; Stenstrom, R.; Nebre, R.; Jaswal, D.; Dodek, P.                                                                                       | 2010 | Quality & Safety in Health Care            | 19        | 5  | 7         | 10.1136/qsch.2009.033407             | #7213  |  | Exclusion reason: Wrong study design (not a RCT or a nonrandomized controlled study) |
| Investigation of correct application of ventilators' humidifier systems before and after nursing education in intensive care units                                                                                                             | Pouryaghobi, S. M.; Ahmadinejad, M.; Hajimaghsoodi, L.; Ebrahimi, M.; Bolvardi, E.; Hashemian, A. M.; Ahmadi, K.                                                    | 2015 | Biosciences Biotechnology Research Asia    | 12        | 3  | 2789-2793 | http://dx.doi.org/10.13005/bbra/1962 | #14572 |  | Exclusion reason: Wrong study design (not a RCT or a nonrandomized controlled study) |
| Is it possible to strengthen psychiatric nursing staff's clinical supervision? RCT of a meta-supervision intervention                                                                                                                          | Gonge, H.; Buus, N.                                                                                                                                                 | 2015 | J Adv Nurs                                 | 71        | 4  | 909-21    | 10.1111/jan.12569                    | #14993 |  | Exclusion reason: Wrong outcomes (not related to behaviour/clinical practice)        |
| Is slide-based or video-based eLearning better at achieving behavioural change in bronchiolitis management? A cluster-based randomised control trial                                                                                           | Talati, R.; Fonseca, B.; Mallitt, K. A.; Mackenzie, J.                                                                                                              | 2022 | J Paediatr Child Health                    | 58        | 12 | 2177-2182 | 10.1111/jpc.16178                    | #22194 |  | Exclusion reason: Wrong outcomes (not related to behaviour/clinical practice)        |
| Lessons Learned From a Theory of Planned Behavior-Derived Study on Educational Interventions Inspired by the Affective Domain                                                                                                                  | Russell-Babin, Kathleen A.                                                                                                                                          | 2017 | Journal of Continuing Education in Nursing | 48        | 12 | 543-551   | 10.3928/00220124-20171115-05         | #12496 |  | Exclusion reason: Wrong outcomes (not related to behaviour/clinical practice)        |
| Longitudinal Comparison of Hospital Nurses' Values, Knowledge, and Implementation of Evidence-Based Practice                                                                                                                                   | Duffy, Joanne R.; Culp, Stacey; Marchessault, Patricia; Olmsted, Katherine                                                                                          | 2020 | Journal of Continuing Education in Nursing | 51        | 5  | 209-214   | 10.3928/00220124-20200415-05         | #18448 |  | Exclusion reason: Wrong outcomes (not related to behaviour/clinical practice)        |
| Managing Premature Infant Stress: Training Does Make a Difference?                                                                                                                                                                             | Wyly, M. Virginia; et al.,                                                                                                                                          | 1988 |                                            |           |    |           |                                      | #5482  |  | Exclusion reason: Wrong type of paper (not a research article)                       |
| Medication Identification Device to Reduce Medication Errors in Nursing Homes: A Controlled Pilot Study                                                                                                                                        | Vogelsmeier, A.; Jacobs, A.; Owen, C.; Mosa, A. S. M.; Subramanian, R.                                                                                              | 2022 | J Gerontol Nurs                            | 48        | 4  | 11-May    | 10.3928/00989134-20220304-01         | #22357 |  | Exclusion reason: Wrong intervention (not an implementation intervention)            |
| Methods for evaluating practice change toward a patient-centered medical home                                                                                                                                                                  | Jaen, C. R.; Crabtree, B. F.; Palmer, R. F.; Ferrer, R. L.; Nutting, P. A.; Miller, W. L.; Stewart, E. E.; Wood, R.; Davila, M.; Stange, K. C.                      | 2010 | Annals of Family Medicine                  | 8 Suppl 1 |    | S9-S92    | http://dx.doi.org/10.1370/afm.1108   | #7449  |  | Exclusion reason: Wrong population (not nurses)                                      |
| Modeling and evaluating evidence-based continuing education program in nursing home dementia care (MEDCED)--training of care home staff to reduce use of restraint in care home residents with dementia. A cluster randomized controlled trial | Testad, I.; Mekki, T. E.; Forland, O.; Oye, C.; Tveit, E. M.; Jacobsen, F.; Kirkevold, O.                                                                           | 2016 | Int J Geriatr Psychiatry                   | 31        | 1  | 24-32     | 10.1002/gps.4285                     | #13253 |  | Exclusion reason: Wrong population (not nurses)                                      |
| Motivational interviewing competencies among UK family nurse partnership nurses: a process evaluation component of the building blocks trial                                                                                                   | Channon, Sue; Bekkers, Marie-Jet; Sanders, Julia; Cannings-John, Rebecca; Robertson, Laura; Bennert, Kristina; Butler, Christopher; Hood, Kerenza; Robling, Michael | 2016 | BMC Nursing                                | 15        |    | 11-Jan    | 10.1186/s12912-016-0176-0            | #14210 |  | Exclusion reason: Wrong study design (not a RCT or a nonrandomized controlled study) |
| Moving Online: A Pilot Clinical Trial of the Changing Talk Online Communication Education for Nursing Home Staff                                                                                                                               | Williams, K. N.; Coleman, C. K.; Perkhounkova, Y.; Beachy, T.; Hein, M.; Shaw, C. A.; Berkley, A.                                                                   | 2021 | Gerontologist                              | 61        | 8  | 1338-1345 | 10.1093/geront/gnaa210               | #22434 |  | Exclusion reason: Wrong population (not nurses)                                      |

#### Additional file 4. Excluded articles at full text assessment stage and reasons for exclusion.

|                                                                                                                                                                                                                              |                                                                                                                                                                                                                                                                                        |      |                                |    |    |            |                                                  |        |                                                                                      |
|------------------------------------------------------------------------------------------------------------------------------------------------------------------------------------------------------------------------------|----------------------------------------------------------------------------------------------------------------------------------------------------------------------------------------------------------------------------------------------------------------------------------------|------|--------------------------------|----|----|------------|--------------------------------------------------|--------|--------------------------------------------------------------------------------------|
| Multicomponent Staff Training Intervention to Improve Residential Dementia Care (PROCUIDA-Demencia): A Mixed-Methods 2-Arm Cluster Randomized Controlled Pilot and Clinical Outcomes Study                                   | Torres-Castro, S.; Rabaneda-Bueno, R.; López-Ortega, M.; Gutiérrez-Robledo, L. M.; Guzmán, A.                                                                                                                                                                                          | 2022 | J Am Med Dir Assoc             | 23 | 3  | 350-358.e5 | 10.1016/j.jamda.2021.09.035                      | #22263 | Exclusion reason: Wrong population (not nurses)                                      |
| Multidimensional team-based intervention using musical cues to reduce odds of facility-acquired pressure ulcers in long-term care: a paired randomized intervention study                                                    | Yap, T. L.; Kennerly, S. M.; Simmons, M. R.; Buncher, C. R.; Miller, E.; Kim, J.; Yap, W. Y.                                                                                                                                                                                           | 2013 | J Am Geriatr Soc               | 61 | 9  | 1552-9     | 10.1111/jgs.12422                                | #16103 | Exclusion reason: Wrong population (not nurses)                                      |
| Multimodal intervention to improve osteoporosis care in home health settings: results from a cluster randomized trial                                                                                                        | Kilgore, M. L.; Outman, R.; Locher, J. L.; Allison, J. J.; Mudano, A.; Kitchin, B.; Saag, K. G.; Curtis, J. R.                                                                                                                                                                         | 2013 | Osteoporos Int                 | 24 | 10 | 2555-60    | 10.1007/s00198-013-2340-7                        | #16641 | Exclusion reason: Wrong population (not nurses)                                      |
| Multisite Web-based training in using the Braden Scale to predict pressure sore risk                                                                                                                                         | Magnan, M. A.; Maklebust, J.                                                                                                                                                                                                                                                           | 2008 | Adv Skin Wound Care            | 21 | 3  | 124-33     | 10.1097/01.ASW.0000305420.73597.d2               | #8969  | Exclusion reason: Wrong outcomes (not related to behaviour/clinical practice)        |
| Neonatal skin care: clinical outcomes of the AWHONN/NANN evidence-based clinical practice guideline. Association of Women's Health, Obstetric and Neonatal Nurses and the National Association of Neonatal Nurses            | Lund, C. H.; Osborne, J. W.; Kuller, J.; Lane, A. T.; Lott, J. W.; Raines, D. A.                                                                                                                                                                                                       | 2001 | J Obstet Gynecol Neonatal Nurs | 30 | 1  | 41-51      |                                                  | #2413  | Exclusion reason: Wrong study design (not a RCT or a nonrandomized controlled study) |
| Neonatal skin care: evaluation of the AWHONN/NANN research-based practice project on knowledge and skin care practices. Association of Women's Health, Obstetric and Neonatal Nurses/National Association of Neonatal Nurses | Lund, C. H.; Kuller, J.; Lane, A. T.; Lott, J. W.; Raines, D. A.; Thomas, K. K.                                                                                                                                                                                                        | 2001 | J Obstet Gynecol Neonatal Nurs | 30 | 1  | 30-40      |                                                  | #2414  | Exclusion reason: Wrong study design (not a RCT or a nonrandomized controlled study) |
| Neurological assessment with validated tools in general ICU: Multicenter, randomized, before and after, pragmatic study to evaluate the effectiveness of an e-learning platform for continuous medical education             | Mistraletti, G.; Umbrello, M.; Anania, S.; Andrichi, E.; Di Carlo, A.; Marti Netti, F.; Barello, S.; Sabbati Ni, G.; Formenti, P.; Maraffi, T.; Marrazzo, F.; Palo, A.; Bellani, G.; Russo, R.; Francesconi, S.; Valdambrini, F.; Cigada, M.; Riccardi, F.; Moja, E. A.; Iapichino, G. | 2017 | Minerva Anestesiologica        | 83 | 2  | 145-154    | http://dx.doi.org/10.23736/S0375-9393.16.11103-4 | #11885 | Exclusion reason: Wrong population (not nurses)                                      |
| Non-pharmacological management of behavioural symptoms in nursing homes                                                                                                                                                      | Deudon, A.; Maubourguet, N.; Gervais, X.; Leone, E.; Brocker, P.; Carcaillon, L.; Riff, S.; Lavallart, B.; Robert, P. H.                                                                                                                                                               | 2009 | Int J Geriatr Psychiatry       | 24 | 12 | 1386-95    | 10.1002/gps.2275                                 | #8412  | Exclusion reason: Wrong population (not nurses)                                      |
| Nurse caring behaviors and patient satisfaction: improvement after a multifaceted staff intervention                                                                                                                         | Yeakel, S.; Maljanian, R.; Bohannon, R. W.; Coulombe, K. H.                                                                                                                                                                                                                            | 2003 | J Nurs Adm                     | 33 | 9  | 434-6      |                                                  | #1177  | Exclusion reason: Wrong study design (not a RCT or a nonrandomized controlled study) |
| Nurse-Family Partnership nurses' attitudes and confidence in identifying and responding to intimate partner violence: An explanatory sequential mixed methods evaluation                                                     | Jack, S. M.; Kimber, M.; Davidov, D.; Ford-Gilboe, M.; Wathen, C. N.; McKee, C.; Tanaka, M.; Boyle, M.; Johnston, C.; Coben, J.; Gasbarro, M.; McNaughton, D.; O'Brien, R.; Olds, D. L.; Scribano, P.; MacMillan, H. L.                                                                | 2021 | JOURNAL OF ADVANCED NURSING    | 77 | 9  | 3894-3910  | 10.1111/jan.14979                                | #20824 | Exclusion reason: Wrong outcomes (not related to behaviour/clinical practice)        |

#### Additional file 4. Excluded articles at full text assessment stage and reasons for exclusion.

|                                                                                                                                                                                             |                                                                                                                                         |      |                                         |     |          |         |                                                |        |                                                                                      |
|---------------------------------------------------------------------------------------------------------------------------------------------------------------------------------------------|-----------------------------------------------------------------------------------------------------------------------------------------|------|-----------------------------------------|-----|----------|---------|------------------------------------------------|--------|--------------------------------------------------------------------------------------|
| Nursing Education Intervention Effects on Pain Intensity of Nursing Home Residents with Different Levels of Cognitive Impairment: A Cluster-Randomized Controlled Trial                     | Kutschar, P.; Berger, S.; Brandauer, A.; Freywald, N.; Osterbrink, J.; Seidenspinner, D.; Gnass, I.                                     | 2020 | Journal of Pain Research                | 13  |          | 633-648 | 10.2147/jpr.S237056                            | #19168 | Exclusion reason: Wrong outcomes (not related to behaviour/clinical practice)        |
| Nursing Intervention Protocol to Improve Chemotherapy Induced Neutropenic Complications among Children with Cancer: A Cluster RCT                                                           | Nagar, P. K.; Trehan, A.; Kaur, S.; Kaur, R.                                                                                            | 2021 | Pediatric Blood and Cancer              | 68  | SUPPL 5  |         | https://dx.doi.org/10.1002/pbc.29349           | #21537 | Exclusion reason: Wrong type of paper (not a research article)                       |
| Nutrition of the critically ill patient and effects of implementing a nutritional support algorithm in ICU                                                                                  | Woien, H.; Bjork, I. T.                                                                                                                 | 2006 | J Clin Nurs                             | 15  | 2        | 168-77  | 10.1111/j.1365-2702.2006.01262.x               | #9976  | Exclusion reason: Wrong intervention (not an implementation intervention)            |
| Online End-of-Life Nursing Education Consortium Core Curriculum for Staff Nurses: An Education Strategy to Improve Clinical Practice                                                        | Bishop, Caitlin Tabler; Mazanec, Polly; Bullington, Jessica; Craven, Heather; Dunkerley, Melissa; Pritchett, Jessica; Coyne, Patrick J. | 2019 | Journal of Hospice & Palliative Nursing | 21  | 6        | 531-539 | 10.1097/NJH.0000000000000593                   | #19372 | Exclusion reason: Wrong outcomes (not related to behaviour/clinical practice)        |
| Optimizing drug treatment among older people in residential care facilities in Helsinki-a randomized, controlled trial                                                                      | Juola, A. L.; Bjorkman, M.; Pylkkanen, S.; Finne-Soveri, H.; Pitkala, K. H.                                                             | 2013 | European Geriatric Medicine             | 4   | SUPPL. 1 | S182    | http://dx.doi.org/10.1016/j.eurger.2013.07.609 | #16665 | Exclusion reason: Wrong type of paper (not a research article)                       |
| Optimizing nursing care by integrating theory-driven evidence-based practice                                                                                                                | Pipe, T. B.                                                                                                                             | 2007 | J Nurs Care Qual                        | 22  | 3        | 234-8   | 10.1097/01.Ncq.0000277780.27771.91             | #9613  | Exclusion reason: Wrong study design (not a RCT or a nonrandomized controlled study) |
| Optimizing treatment of respiratory tract infections in nursing homes: Nurse-initiated polymerase chain reaction testing                                                                    | Dowson, L.; Marshall, C.; Buising, K.; Friedman, N. D.; Kong, D. C. M.; Stuart, R. L.                                                   | 2019 | American Journal of Infection Control   | 47  | 8        | 911-915 |                                                | #18451 | Exclusion reason: Wrong study design (not a RCT or a nonrandomized controlled study) |
| Outcomes of developmentally supportive nursing care for very low birth weight infants                                                                                                       | Becker, P. T.; Grunwald, P. C.; Moorman, J.; Stuhr, S.                                                                                  | 1991 | Nursing Research                        | 40  | 3        | 150-155 |                                                | #4571  | Exclusion reason: Wrong study design (not a RCT or a nonrandomized controlled study) |
| Outreach education for integration of HIV/AIDS care, antiretroviral treatment, and tuberculosis care in primary care clinics in South Africa: PALSA PLUS pragmatic cluster randomised trial | Zwarenstein, M.; Fairall, L. R.; Lombard, C.; Mayers, P.; Bheekie, A.; English, R. G.; Lewin, S.; Bachmann, M. O.; Bateman, E.          | 2011 | BMJ                                     | 342 |          | d2022   | 10.1136/bmj.d2022                              | #6630  | Exclusion reason: Wrong population (not nurses)                                      |
| P.r.n. medication use in a psychiatric high-dependency unit following the introduction of a nurse-led activity programme                                                                    | Thomas, B.; Jones, M.; Johns, P.; Trauer, T.                                                                                            | 2006 | Int J Ment Health Nurs                  | 15  | 4        | 266-71  | 10.1111/j.1447-0349.2006.00433.x               | #10647 | Exclusion reason: Wrong population (not nurses)                                      |
| Pain assessment and training: the impact on pain control after cardiac surgery                                                                                                              | Silva, M. A. D.; Pimenta, C. A. D.; da Cruz, D. A. M.                                                                                   | 2013 | Revista Da Escola De Enfermagem Da Usp  | 47  | 1        | 83-91   |                                                | #16287 | Exclusion reason: Wrong study design (not a RCT or a nonrandomized controlled study) |
| Pain Management Algorithms for Implementing Best Practices in Nursing Homes: Results of a Randomized Controlled Trial                                                                       | Ersek, M.; Neradilek, M. B.; Herr, K.; Jablonski, A.; Polissar, N.; Du Pen, A.                                                          | 2016 | J Am Med Dir Assoc                      | 17  | 4        | 348-56  | 10.1016/j.jamd.2016.01.001                     | #14023 | Exclusion reason: Wrong outcomes (not related to behaviour/clinical practice)        |



#### Additional file 4. Excluded articles at full text assessment stage and reasons for exclusion.

|                                                                                                                                                                              |                                                                                                                                                                                                               |      |                                                 |    |          |                                                 |                                                  |        |                                                                                      |
|------------------------------------------------------------------------------------------------------------------------------------------------------------------------------|---------------------------------------------------------------------------------------------------------------------------------------------------------------------------------------------------------------|------|-------------------------------------------------|----|----------|-------------------------------------------------|--------------------------------------------------|--------|--------------------------------------------------------------------------------------|
| Palliative care nurses' experiences of training in cognitive behaviour therapy and taking part in a randomized controlled trial                                              | Cort, E.; Moorey, S.; Hotopf, M.; Kapari, M.; Monroe, B.; Hansford, P.                                                                                                                                        | 2009 | Int J Palliat Nurs                              | 15 | 6        | 290-8                                           | 10.12968/ijpn.2009.15.6.42988                    | #8447  | Exclusion reason: Wrong study design (not a RCT or a nonrandomized controlled study) |
| Partners in caregiving in a special care environment: cooperative communication between staff and families on dementia units                                                 | Robison, J.; Curry, L.; Gruman, C.; Porter, M.; Henderson, C. R., Jr.; Pillemer, K.                                                                                                                           | 2007 | Gerontologist                                   | 47 | 4        | 504-15                                          |                                                  | #9517  | Exclusion reason: Wrong outcomes (not related to behaviour/clinical practice)        |
| Pediatric sepsis: Evidence-based guidelines that support the nurse's role in early recognition                                                                               | Lovelace, Cathy Diane                                                                                                                                                                                         | 2018 |                                                 | 79 |          | No Pagination Specified-No Pagination Specified |                                                  | #11153 | Exclusion reason: Wrong type of paper (not a research article)                       |
| Peripheral venous catheter care in the emergency department: education and feedback lead to marked improvements                                                              | Fakih, M. G.; Jones, K.; Rey, J. E.; Takla, R.; Szpunar, S.; Brown, K.; Boelstler, A.; Saravolatz, L.                                                                                                         | 2013 | Am J Infect Control                             | 41 | 6        | 531-6                                           | 10.1016/j.ajic.2012.07.010                       | #17242 | Exclusion reason: Wrong study design (not a RCT or a nonrandomized controlled study) |
| Positive deviance: a new strategy for improving hand hygiene compliance                                                                                                      | Marra, A. R.; Guastelli, L. R.; de Araujo, C. M.; dos Santos, J. L.; Lamblet, L. C.; Silva, M., Jr.; de Lima, G.; Cal, R. G.; Paes, A. T.; Cendoroglo Neto, M.; Barbosa, L.; Edmond, M. B.; dos Santos, O. F. | 2010 | Infect Control Hosp Epidemiol                   | 31 | 1        | 20-Dec                                          | 10.1086/649224                                   | #7205  | Exclusion reason: Wrong population (not nurses)                                      |
| Possible effects of a course in cardiovascular nursing on prehospital care of patients experiencing suspected acute coronary syndrome: a cluster randomised controlled trial | Wireklint Sundström, Birgitta; Holmberg, Mats; Herlitz, Johan; Karlsson, Thomas; Andersson, Henrik                                                                                                            | 2016 | BMC Nursing                                     | 15 |          | 09-Jan                                          | 10.1186/s12912-016-0175-1                        | #13567 | Exclusion reason: Wrong population (not nurses)                                      |
| Practice-level effects of interventions to improve asthma care in primary care settings: The pediatric asthma care patient outcomes research team                            | Finkelstein, J. A.; Lozano, P.; Fuhlbrigge, A. L.; Carey, V. J.; Inui, T. S.; Soumerai, S. B.; Sullivan, S. D.; Wagner, E. H.; Weiss, S. T.; Weiss, K. B.                                                     | 2005 | Health Services Research                        | 40 | 6        | 1737-1757                                       | 10.1111/j.1475-6773.2005.00451.x                 | #1055  | Exclusion reason: Wrong population (not nurses)                                      |
| Prescribe to Save Lives: Improving Buprenorphine Prescribing among HIV Clinicians                                                                                            | Jawa, R.; Walley, A. Y.; Wilson, D. J.; Green, T. C.; McKenzie, M.; Hoskinson, R.; Bratberg, J.; Ramsey, S.; Rich, J. D.; Friedmann, P. D.                                                                    | 2022 | Journal of Acquired Immune Deficiency Syndromes | 90 | 5        | 546-552                                         | https://dx.doi.org/10.1097/QAI.00000000000003001 | #20843 | Exclusion reason: Wrong population (not nurses)                                      |
| Pressure ulcers: implementation of evidence-based nursing practice                                                                                                           | Clarke, H. F.; Bradley, C.; Whytock, S.; Handfield, S.; van der Wal, R.; Gundry, S.                                                                                                                           | 2005 | Journal of Advanced Nursing                     | 49 | 6        | 578-590                                         | 10.1111/j.1365-2648.2004.03333.x                 | #732   | Exclusion reason: Wrong study design (not a RCT or a nonrandomized controlled study) |
| Pressure-relieving equipment: promoting its correct use amongst nurses via differing modes of educational delivery                                                           | Wedge, C.; Gosney, M.                                                                                                                                                                                         | 2005 | J Clin Nurs                                     | 14 | 4        | 473-8                                           | 10.1111/j.1365-2702.2004.01082.x                 | #331   | Exclusion reason: Wrong population (not nurses)                                      |
| Primary care drug therapy training: the solution for PHC nurses?                                                                                                             | Rothmann, J. C.; Gerber, J. J.; Venter, O. M.; Steyn, H. S.; Monteith, J. L.                                                                                                                                  | 2000 | Curationis                                      | 23 | 1        | 43-52                                           |                                                  | #2819  | Exclusion reason: Wrong outcomes (not related to behaviour/clinical practice)        |
| Promoting hygienic hand disinfection as an ongoing task: Results of a cluster-randomized controlled trial to (re-)raise compliance of physicians and nurses                  | Von Lengerke, T.; Lutze, B.; Krauth, C.; Lange, K.; Stahmeyer, J. T.; Chaberny, I. F.                                                                                                                         | 2015 | Antimicrobial Resistance and Infection Control  | 4  | SUPPL. 1 |                                                 |                                                  | #14331 | Exclusion reason: Wrong type of paper (not a research article)                       |

#### Additional file 4. Excluded articles at full text assessment stage and reasons for exclusion.

|                                                                                                                                                                                                                                              |                                                                                                                                                         |      |                                               |     |          |      |           |                                     |                                                                |                                                                                      |
|----------------------------------------------------------------------------------------------------------------------------------------------------------------------------------------------------------------------------------------------|---------------------------------------------------------------------------------------------------------------------------------------------------------|------|-----------------------------------------------|-----|----------|------|-----------|-------------------------------------|----------------------------------------------------------------|--------------------------------------------------------------------------------------|
| based on psychological tailoring in a tertiary intensive care setting                                                                                                                                                                        |                                                                                                                                                         |      |                                               |     |          |      |           |                                     |                                                                |                                                                                      |
| Promoting hygienic hand disinfection as an ongoing task: Results of the psygiene cluster-randomized controlled trial to (Re-)raise compliance of physicians and nurses based on psychological tailoring in a tertiary intensive care setting | Von Lengerke, T.; Lutze, B.; Krauth, C.; Lange, K.; Stahmeyer, J.; Chaberny, I.                                                                         | 2015 | International Journal of Medical Microbiology | 305 | SUPPL. 1 | 27   |           | #14332                              | Exclusion reason: Wrong type of paper (not a research article) |                                                                                      |
| Prompting primary providers to increase community exercise referrals for older adults: a randomized trial                                                                                                                                    | Ackermann, R. T.; Deyo, R. A.; LoGerfo, J. P.                                                                                                           | 2005 | J Am Geriatr Soc                              | 53  |          | 2    | 283-9     | 10.1111/j.1532-5415.2005.53115.x    | #840                                                           | Exclusion reason: Wrong population (not nurses)                                      |
| Providing Competency Training to Clinical Supervisors through an Interactional Supervision Approach                                                                                                                                          | Tebes, Jacob Kraemer; Matlin, Samantha L.; Migdole, Scott J.; Farkas, Melanie S.; Money, Roy W.; Shulman, Lawrence; Hoge, Michael A.                    |      | Research on Social Work Practice              | 21  |          | 2    | 190-199   |                                     | #5560                                                          | Exclusion reason: Wrong population (not nurses)                                      |
| Psychological skills training for managing difficult patient encounters: Results of a pilot randomized controlled trial for oncology nurses                                                                                                  | Traeger, L.; Eusebio, J.; Park, E.; Repper-Delisi, J.; Jacobo, M.; Convery, M. S.; Pirl, W.                                                             | 2013 | Psycho-Oncology                               | 22  | SUPPL. 2 |      | 80-81     | http://dx.doi.org/10.1002/po.n.3245 | #16220                                                         | Exclusion reason: Wrong type of paper (not a research article)                       |
| Psychosocial behaviour management programme for home-dwelling people with dementia: A cluster-randomized controlled trial                                                                                                                    | Nakanishi, M.; Endo, K.; Hirooka, K.; Granvik, E.; Minthon, L.; Nagga, K.; Nishida, A.                                                                  | 2018 | Int J Geriatr Psychiatry                      | 33  |          | 3    | 495-503   | 10.1002/gps.4784                    | #11724                                                         | Exclusion reason: Wrong population (not nurses)                                      |
| Quality improvement report - Effect of multifaceted intervention promoting early switch from intravenous to oral acetaminophen for postoperative pain: controlled, prospective, before and after study                                       | Ripouteau, C.; Conort, O.; Lamas, J. P.; Auleley, G. R.; Hazebroucq, G.; Durieux, P.                                                                    | 2000 | British Medical Journal                       | 321 |          | 7274 | 1460-1463 | 10.1136/bmj.321.7274.1460           | #2828                                                          | Exclusion reason: Wrong study design (not a RCT or a nonrandomized controlled study) |
| Quality of telephone-based cancer symptom management by nurses: a quality improvement project                                                                                                                                                | Stacey, D.; Ludwig, C.; Jolicoeur, L.; Carley, M.; Balchin, K.; Jibb, L.; Kelly, F.; Kuziemy, C.; Madore, S.; Rambout, L.; Vickers, M. M.; Martelli, L. | 2021 | Supportive Care in Cancer                     | 29  |          | 2    | 841-849   | 10.1007/s00520-020-05551-5          | #17755                                                         | Exclusion reason: Wrong study design (not a RCT or a nonrandomized controlled study) |
| Randomised controlled trial of training health visitors to identify and help couples with relationship problems following a birth                                                                                                            | Simons, J.; Reynolds, J.; Morison, L.                                                                                                                   | 2001 | British Journal of General Practice           | 51  |          | 471  | 793-799   |                                     | #17362                                                         | Exclusion reason: Wrong population (not nurses)                                      |
| Randomized controlled trial comparing four strategies for delivering e-curriculum to health care professionals [ISRCTN88148532]                                                                                                              | Kemper, K. J.; Gardiner, P.; Gobble, J.; Mitra, A.; Woods, C.                                                                                           | 2006 | BMC Med Educ                                  | 6   |          |      | 2         | 10.1186/1472-6920-6-2               | #10514                                                         | Exclusion reason: Wrong population (not nurses)                                      |
| Randomized controlled trial of teaching practice nurses to carry out structured assessments of patients receiving depot antipsychotic injections                                                                                             | Burns, T.; Millar, E.; Garland, C.; Kendrick, T.; Chisholm, B.; Ross, F.                                                                                | 1998 | Br J Gen Pract                                | 48  |          | 437  | 1845-8    |                                     | #3769                                                          | Exclusion reason: Wrong population (not nurses)                                      |
| Randomized trial of an internet curriculum on herbs and other dietary supplements for health care professionals                                                                                                                              | Kemper, K. J.; Amata-Kynvi, A.; Sanghavi, D.; Whelan, J. S.; Dvorkin, L.; Woolf, A.; Samuels, R. C.; Hibberd, P.                                        | 2002 | Acad Med                                      | 77  |          | 9    | 882-9     |                                     | #3028                                                          | Exclusion reason: Wrong population (not nurses)                                      |
| RANDOMIZED TRIAL of PATIENT ACTOR TRAINING to IMPROVE PrEP SERVICES for AGYW in KENYA                                                                                                                                                        | Kohler, P.; Kinuthia, J.; Larsen, A.; Abuna, F.; Owiti, G.; Sila, J.; Owens, T.; Kemunto, V.; Lagat, H.; Vera, M.;                                      | 2022 | Topics in Antiviral Medicine                  | 30  | 1 SUPPL  |      | 369       |                                     | #21024                                                         | Exclusion reason: Wrong type of paper (not a research article)                       |

#### Additional file 4. Excluded articles at full text assessment stage and reasons for exclusion.

|                                                                                                                                                                   |                                                                                                                                                                                    |      |                                                        |     |    |           |                                              |        |                                                                                      |
|-------------------------------------------------------------------------------------------------------------------------------------------------------------------|------------------------------------------------------------------------------------------------------------------------------------------------------------------------------------|------|--------------------------------------------------------|-----|----|-----------|----------------------------------------------|--------|--------------------------------------------------------------------------------------|
|                                                                                                                                                                   | Richardson, B. A.; Pintye, J.; John-Stewart, G.                                                                                                                                    |      |                                                        |     |    |           |                                              |        |                                                                                      |
| Randomized trial to improve fracture prevention in nursing home residents                                                                                         | Colon-Emeric, C. S.; Lyles, K. W.; House, P.; Levine, D. A.; Schenck, A. P.; Allison, J.; Gorospe, J.; Fermazin, M.; Oliver, K.; Curtis, J. R.; Weissman, N.; Xie, A.; Saag, K. G. | 2007 | Am J Med                                               | 120 | 10 | 886-92    | 10.1016/j.amjmed.2007.04.020                 | #10295 | Exclusion reason: Wrong population (not nurses)                                      |
| Rapid Learning of Adverse Medical Event Disclosure and Apology                                                                                                    | Raemer, D. B.; Locke, S.; Walzer, T. B.; Gardner, R.; Baer, L.; Simon, R.                                                                                                          | 2016 | J Patient Saf                                          | 12  | 3  | 140-7     | 10.1097/pts.000000000000080                  | #13871 | Exclusion reason: Wrong population (not nurses)                                      |
| Reducing intrapartum fetal deaths through low-dose high frequency clinical mentorship in a rural hospital in Western Kenya: a quasi-experimental study            | Shikuku, D. N.; Mukosa, R.; Peru, T.; Yaite, A.; Ambuchi, J.; Sisimwo, K.                                                                                                          | 2019 | BMC Pregnancy Childbirth                               | 19  | 1  | 518       | 10.1186/s12884-019-2673-0                    | #18136 | Exclusion reason: Wrong outcomes (not related to behaviour/clinical practice)        |
| Reducing pressure ulcer prevalence rates in the long-term acute care setting                                                                                      | Milne, C. T.; Trigilia, D.; Houle, T. L.; Delong, S.; Rosenblum, D.                                                                                                                | 2009 | Ostomy Wound Manage                                    | 55  | 4  | Sep-50    |                                              | #8516  | Exclusion reason: Wrong study design (not a RCT or a nonrandomized controlled study) |
| Reducing Treatment Errors Through Point-of-Care Glucometer Configuration                                                                                          | Estock, J. L.; Pham, I. T.; Curinga, H. K.; Sprague, B. J.; Boudreaux-Kelly, M. Y.; Acevedo, J.; Jacobs, K.                                                                        | 2018 | Joint Commission Journal on Quality and Patient Safety | 44  | 11 | 683-694   | http://dx.doi.org/10.1016/j.jcjq.2018.03.014 | #11469 | Exclusion reason: Wrong intervention (not an implementation intervention)            |
| Reduction of catheter-associated bloodstream infections in pediatric patients: experimentation and reality                                                        | McKee, C.; Berkowitz, I.; Cosgrove, S. E.; Bradley, K.; Beers, C.; Perl, T. M.; Winner, L.; Pronovost, P. J.; Miller, M. R.                                                        | 2008 | Pediatr Crit Care Med                                  | 9   | 1  | Jun-40    | 10.1097/01.Pcc.0000299821.46193.A3           | #8953  | Exclusion reason: Wrong study design (not a RCT or a nonrandomized controlled study) |
| Remote Stewardship for Medically Underserved Nurseries: A Stepped-Wedge, Cluster Randomized Study                                                                 | Cantey, J. B.; Correa, C. C.; Dugi, D. D.; Huff, E.; Olaya, J. E.; Farnar, R.                                                                                                      | 2022 | Pediatrics                                             | 149 | 5  |           | 10.1542/peds.2021-055686                     | #20058 | Exclusion reason: Wrong outcomes (not related to behaviour/clinical practice)        |
| Remote video auditing with real-time feedback in an academic surgical suite improves safety and efficiency metrics: a cluster randomised study                    | Overdyk, F. J.; Dowling, O.; Newman, S.; Glatt, D.; Chester, M.; Armellino, D.; Cole, B.; Landis, G. S.; Schoenfeld, D.; DiCapua, J. F.                                            | 2016 | BMJ Qual Saf                                           | 25  | 12 | 947-953   | 10.1136/bmjqs-2015-004226                    | #13437 | Exclusion reason: Wrong population (not nurses)                                      |
| Removal of C-spine protection by A&E triage nurses: a prospective trial of a clinical decision making instrument                                                  | Pitt, E.; Pedley, D. K.; Nelson, A.; Cumming, M.; Johnston, M.                                                                                                                     | 2006 | Emerg Med J                                            | 23  | 3  | 214-5     | 10.1136/emj.2005.023697                      | #10335 | Exclusion reason: Wrong type of paper (not a research article)                       |
| Research on the effect of cooperative learning model on nursing skills of practice nurses and standardized training of newly-recruited nurses                     | Yang, L.; Jiang, D.; Nie, H.; Tang, S.                                                                                                                                             | 2018 | Biomedical Research (India)                            | 29  | 9  | 1788-1791 |                                              | #10953 | Exclusion reason: Wrong outcomes (not related to behaviour/clinical practice)        |
| Responding to Young People's Health Risks in Primary Care: A Cluster Randomised Trial of Training Clinicians in Screening and Motivational Interviewing           | Sanci, L.; Chondros, P.; Sawyer, S.; Pirkis, J.; Ozer, E.; Hegarty, K.; Yang, F.; Grabsch, B.; Shiell, A.; Cahill, H.; Ambresin, A. E.; Patterson, E.; Patton, G.                  | 2015 | PLoS ONE                                               | 10  | 9  | e0137581  | 10.1371/journal.pone.0137581                 | #14518 | Exclusion reason: Wrong outcomes (not related to behaviour/clinical practice)        |
| Results of a multi-site pragmatic hybrid type 3 cluster randomized trial comparing level of facilitation while implementing an intervention in community-dwelling | Spoelstra, S. L.; Schueller, M.; Basso, V.; Sikorskii, A.                                                                                                                          | 2022 | Implement Sci                                          | 17  | 1  | 57        | 10.1186/s13012-022-01232-5                   | #22120 | Exclusion reason: Wrong intervention (not an implementation intervention)            |

#### Additional file 4. Excluded articles at full text assessment stage and reasons for exclusion.

|                                                                                                                                                                                                                   |                                                                                                                                                                                           |      |                                                                                           |     |    |          |                                                  |        |                                                                                      |
|-------------------------------------------------------------------------------------------------------------------------------------------------------------------------------------------------------------------|-------------------------------------------------------------------------------------------------------------------------------------------------------------------------------------------|------|-------------------------------------------------------------------------------------------|-----|----|----------|--------------------------------------------------|--------|--------------------------------------------------------------------------------------|
| disabled and older adults in a Medicaid waiver                                                                                                                                                                    |                                                                                                                                                                                           |      |                                                                                           |     |    |          |                                                  |        |                                                                                      |
| Results of a multicentre randomised controlled trial of statistical process control charts and structured diagnostic tools to reduce ward-acquired methicillin-resistant Staphylococcus aureus: the CHART Project | Curran, E.; Harper, P.; Loveday, H.; Gilmour, H.; Jones, S.; Benneyan, J.; Hood, J.; Pratt, R.                                                                                            | 2008 | J Hosp Infect                                                                             | 70  | 2  | 127-35   | 10.1016/j.jhin.2008.06.013                       | #9238  | Exclusion reason: Wrong population (not nurses)                                      |
| Results of implementing a pain management algorithm in intensive care unit patients: The impact on pain assessment, length of stay, and duration of ventilation                                                   | Olsen, B. F.; Rustoen, T.; Sandvik, L.; Jacobsen, M.; Valeberg, B. T.                                                                                                                     | 2016 | Journal of Critical Care                                                                  | 36  |    | 207-211  | http://dx.doi.org/10.1016/j.jcr.2016.07.011      | #13447 | Exclusion reason: Wrong study design (not a RCT or a nonrandomized controlled study) |
| Safety culture in French nursing homes: A randomised controlled study to evaluate the effectiveness of a risk management intervention associated with care                                                        | Teignin, D.; Mabileau, G.; Lucas, M.; Moret, L.; Terrien, N.                                                                                                                              | 2022 | PLoS One                                                                                  | 17  | 12 | e0277121 | 10.1371/journal.pone.0277121                     | #22217 | Exclusion reason: Wrong population (not nurses)                                      |
| Safety, efficacy, and cost effectiveness of evidence-based guidelines for the management of acute low back pain in primary care                                                                                   | McGuirk, B.; King, W.; Govind, J.; Lowry, J.; Bogduk, N.                                                                                                                                  | 2001 | Spine (Phila Pa 1976)                                                                     | 26  | 23 | 2615-22  |                                                  | #2397  | Exclusion reason: Wrong population (not nurses)                                      |
| Satisfaction with nursing care and work during a year of clinical supervision and individualized care. Comparison between two wards for the care of severely demented patients                                    | Hallberg, I. R.; Hansson, U. W.; Axelsson, K.                                                                                                                                             | 1993 | J Nurs Manag                                                                              | 1   | 6  | 297-307  | 10.1111/j.1365-2834.1993.tb00231.x               | #5042  | Exclusion reason: Wrong outcomes (not related to behaviour/clinical practice)        |
| Scaling Up Patient-Centered Interdisciplinary Care for Multimorbidity: A Pragmatic Mixed-Methods Randomized Controlled Trial                                                                                      | Fortin, M.; Stewart, M.; Ngangue, P.; Almirall, J.; Belanger, M.; Brown, J. B.; Couture, M.; Gallagher, F.; Katz, A.; Loinon, C.; Ryan, B. L.; Sampalli, T.; Wong, S. T.; Zwarenstein, M. | 2021 | ANNALS OF FAMILY MEDICINE                                                                 | 19  | 2  | 126-134  | 10.1370/afm.2650                                 | #20460 | Exclusion reason: Wrong population (not nurses)                                      |
| Self-directed Versus Traditional Classroom Training for Neonatal Resuscitation                                                                                                                                    | Weiner, Gary M.; Menghini, Karin; Zaichkin, Jeanette; Caid, Ann E.; Jacoby, Carrie J.; Simon, Wendy M.                                                                                    | 2011 | Pediatrics                                                                                | 127 | 4  | 713-719  | 10.1542/pedS.2010-2829                           | #6134  | Exclusion reason: Wrong outcomes (not related to behaviour/clinical practice)        |
| SEPSIS SCREENING IN TRIAGE TO DECREASE DOOR-TO-ANTIBIOTIC TIME                                                                                                                                                    | Mitzkewich, M.                                                                                                                                                                            | 2019 | Journal of Emergency Nursing                                                              | 45  | 3  | 254-256  | 10.1016/j.jen.2018.08.002                        | #10829 | Exclusion reason: Wrong study design (not a RCT or a nonrandomized controlled study) |
| Service-learning and nursing professional values development: an experimental research study                                                                                                                      | Fowler, D. L.                                                                                                                                                                             | 2013 | Nurs Educ Perspect                                                                        | 34  | 1  | Jan-50   |                                                  | #16821 | Exclusion reason: Wrong population (not nurses)                                      |
| Simulation exercise to improve retention of cardiopulmonary resuscitation priorities for in-hospital cardiac arrests: A randomized controlled trial                                                               | Sullivan, N. J.; Duval-Arnould, J.; Twilley, M.; Smith, S. P.; Aksamit, D.; Boone-Guercio, P.; Jeffries, P. R.; Hunt, E. A.                                                               | 2015 | Resuscitation                                                                             | 86  |    | 13-Jun   | 10.1016/j.resuscitation.2014.10.021              | #14461 | Exclusion reason: Wrong outcomes (not related to behaviour/clinical practice)        |
| Simulation- vs. Didactic-Based Learning for Rehabilitation Nurses Caring for Patients With Autonomic Dysreflexia                                                                                                  | Alvarado, V.; Stutzman, S. E.; Nairon, E.; Olson, D. M.                                                                                                                                   | 2023 | Rehabilitation nursing : the official journal of the Association of Rehabilitation Nurses |     |    |          | https://dx.doi.org/10.1097/RN.J.0000000000000401 | #19815 | Exclusion reason: Wrong outcomes (not related to behaviour/clinical practice)        |

#### Additional file 4. Excluded articles at full text assessment stage and reasons for exclusion.

|                                                                                                                                                                                |                                                                                                                                                                      |      |                                                              |     |    |                                                                                                                                |        |                                                                                      |
|--------------------------------------------------------------------------------------------------------------------------------------------------------------------------------|----------------------------------------------------------------------------------------------------------------------------------------------------------------------|------|--------------------------------------------------------------|-----|----|--------------------------------------------------------------------------------------------------------------------------------|--------|--------------------------------------------------------------------------------------|
| Simulation-based education to decrease CAUTI rates in the intensive care                                                                                                       | Bell, Janet                                                                                                                                                          | 2018 |                                                              | 79  |    | No Pagination Specified-No Pagination Specified                                                                                | #11845 | Exclusion reason: Wrong type of paper (not a research article)                       |
| Simulation-based team training for multi-professional obstetric care teams to improve patient outcome: a multicentre, cluster randomised controlled trial                      | Fransen, A. F.; van de Ven, J.; Schuit, E.; van Tetering, A. A. C.; Mol, B. W.; Oei, S. G.                                                                           | 2017 | BJOG: An International Journal of Obstetrics and Gynaecology | 124 | 4  | 641-650<br><a href="http://dx.doi.org/10.1111/1471-0528.14369">http://dx.doi.org/10.1111/1471-0528.14369</a>                   | #12215 | Exclusion reason: Wrong outcomes (not related to behaviour/clinical practice)        |
| Soundscape Awareness Intervention Reduced Neuropsychiatric Symptoms in Nursing Home Residents With Dementia: A Cluster-Randomized Trial With MoSART                            | Kosters, J.; Janus, S. I. M.; van den Bosch, K. A.; Andringa, T. C.; Hoop, E. O.; de Boer, M. R.; Elburg, R. A. J.; Warmelink, S.; Zuidema, S. U.; Luijendijk, H. J. | 2023 | J Am Med Dir Assoc                                           | 24  | 2  | 192-198.e5<br>10.1016/j.jamd.2022.11.010                                                                                       | #21041 | Exclusion reason: Wrong population (not nurses)                                      |
| Specialized emergency nurses treating ankle and foot injuries: a randomized controlled trial                                                                                   | Derksen, R. J.; Bakker, F. C.; de Lange-de Klerk, E. S.; Spaans, I. M.; Heilbron, E. A.; Veenings, B.; Haarman, H. J.                                                | 2007 | Am J Emerg Med                                               | 25  | 2  | 144-51<br>10.1016/j.ajem.2006.06.011                                                                                           | #10253 | Exclusion reason: Wrong intervention (not an implementation intervention)            |
| Spirometry in primary care practice: the importance of quality assurance and the impact of spirometry workshops                                                                | Eaton, T.; Withy, S.; Garrett, J. E.; Mercer, J.; Whitlock, R. M.; Rea, H. H.                                                                                        | 1999 | CHEST                                                        | 116 | 2  | 416-23                                                                                                                         | #3440  | Exclusion reason: Wrong population (not nurses)                                      |
| Staff Nurse Utilization of Kangaroo Care as an Intervention for Procedural Pain in Preterm Infants                                                                             | Benoit, B.; Campbell-Yeo, M.; Johnston, C.; Latimer, M.; Caddell, K.; Orr, T.                                                                                        | 2016 | Advances in Neonatal Care                                    | 16  | 3  | 229-238<br>10.1097/anc.0000000000000262                                                                                        | #14697 | Exclusion reason: Wrong study design (not a RCT or a nonrandomized controlled study) |
| Staff outcomes from the caring for aged dementia care resident study (CADRES): a cluster randomised trial                                                                      | Jeon, Y. H.; Luscombe, G.; Chenoweth, L.; Stein-Parbury, J.; Brodaty, H.; King, M.; Haas, M.                                                                         | 2012 | Int J Nurs Stud                                              | 49  | 5  | 508-18<br>10.1016/j.ijnurstu.2011.10.020                                                                                       | #5968  | Exclusion reason: Wrong intervention (not an implementation intervention)            |
| Standardized Attending Rounds to Improve the Patient Experience: A Pragmatic Cluster Randomized Controlled Trial                                                               | Monash, B.; Najafi, N.; Mourad, M.; Rajkomar, A.; Ranji, S. R.; Fang, M. C.; Glass, M.; Milev, D.; Ding, Y.; Shen, A.; Sharpe, B. A.; Harrison, J. D.                | 2017 | J Hosp Med                                                   | 12  | 3  | 143-149<br>10.12788/jhm.2694                                                                                                   | #11875 | Exclusion reason: Wrong intervention (not an implementation intervention)            |
| STAR: a dementia-specific training program for staff in assisted living residences                                                                                             | Teri, L.; Huda, P.; Gibbons, L.; Young, H.; van Leynseele, J.                                                                                                        | 2005 | Gerontologist                                                | 45  | 5  | 686-693                                                                                                                        | #379   | Exclusion reason: Wrong population (not nurses)                                      |
| Stepwise interventions for improving hand hygiene compliance in a level 3 academic neonatal intensive care unit in north India                                                 | Gopalakrishnan, S.; Chaurasia, S.; Sankar, M. J.; Paul, V. K.; Deorari, A. K.; Joshi, M.; Agarwal, R.                                                                | 2021 | Journal of Perinatology                                      | 41  | 12 | 2834-2839<br><a href="https://dx.doi.org/10.1038/s41372-021-01141-3">https://dx.doi.org/10.1038/s41372-021-01141-3</a>         | #20565 | Exclusion reason: Wrong study design (not a RCT or a nonrandomized controlled study) |
| Strengthening the afferent limb of rapid response systems: an educational intervention using web-based learning for early recognition and responding to deteriorating patients | Liaw, S. Y.; Wong, L. F.; Ang, S. B.; Ho, J. T.; Siau, C.; Ang, E. N.                                                                                                | 2016 | BMJ Qual Saf                                                 | 25  | 6  | 448-56<br>10.1136/bmjqs-2015-004073                                                                                            | #13662 | Exclusion reason: Wrong outcomes (not related to behaviour/clinical practice)        |
| Successful cardiovascular risk reduction in Type 2 diabetes by nurse-led care using an open clinical algorithm                                                                 | Woodward, A.; Wallymahmed, M.; Wilding, J.; Gill, G.                                                                                                                 | 2006 | Diabetic Medicine                                            | 23  | 7  | 780-787<br><a href="http://dx.doi.org/10.1111/j.1464-5491.2006.01889.x">http://dx.doi.org/10.1111/j.1464-5491.2006.01889.x</a> | #9972  | Exclusion reason: Wrong intervention (not an implementation intervention)            |

#### Additional file 4. Excluded articles at full text assessment stage and reasons for exclusion.

|                                                                                                                                                                                              |                                                                                                                                                                                                                                                                                   |      |                                                 |     |                |            |                                                 |        |                                                                                      |
|----------------------------------------------------------------------------------------------------------------------------------------------------------------------------------------------|-----------------------------------------------------------------------------------------------------------------------------------------------------------------------------------------------------------------------------------------------------------------------------------|------|-------------------------------------------------|-----|----------------|------------|-------------------------------------------------|--------|--------------------------------------------------------------------------------------|
| Successful e-learning programme on the detection of child abuse in emergency departments: a randomised controlled trial                                                                      | Smeeckens, A. E.; Broekhuijsen-van Henten, D. M.; Sittig, J. S.; Russel, I. M.; ten Cate, O. T.; Turner, N. M.; van de Putte, E. M.                                                                                                                                               | 2011 | Arch Dis Child                                  | 96  | 4              | 330-4      | 10.1136/adc.2010.190801                         | #6276  | Exclusion reason: Wrong outcomes (not related to behaviour/clinical practice)        |
| Successful knowledge translation intervention in long-term care: final results from the vitamin D and osteoporosis study (ViDOS) pilot cluster randomized controlled trial                   | Kennedy, C. C.; Ioannidis, G.; Thabane, L.; Adachi, J. D.; Marr, S.; Giangregorio, L. M.; Morin, S. N.; Crilly, R. G.; Josse, R. G.; Lohfeld, L.; Pickard, L. E.; van der Horst, M. L.; Campbell, G.; Stroud, J.; Dolovich, L.; Sawka, A. M.; Jain, R.; Nash, L.; Papaioannou, A. | 2015 | Trials                                          | 16  |                | 214        | 10.1186/s13063-015-0720-3                       | #14871 | Exclusion reason: Wrong population (not nurses)                                      |
| Surgical nurses' attitudes towards caring for patients dying of cancer - a pilot study of an educational intervention on existential issues                                                  | Udo, C.; Melin-Johansson, C.; Henoch, I.; Axelsson, B.; Danielson, E.                                                                                                                                                                                                             | 2014 | Eur J Cancer Care (Engl)                        | 23  | 4              | 426-40     | 10.1111/ecc.12142                               | #15197 | Exclusion reason: Wrong outcomes (not related to behaviour/clinical practice)        |
| Sustainability takes time: Effects of the psychologically tailored interventions on hand hygiene compliance in the PSYGIENE cluster-randomized controlled trial after two years of follow-up | Von Lengerke, T.; Lutze, B.; Krauth, C.; Lange, K.; Stahmeyer, J. T.; Chaberny, I. F.                                                                                                                                                                                             | 2016 | International Journal of Medical Microbiology   | 306 | 8 Supplement 1 | 16         | http://dx.doi.org/10.1016/j.ijmm.2016.11.008    | #13182 | Exclusion reason: Wrong type of paper (not a research article)                       |
| Sustained benefits of a community dietetics intervention designed to improve oral nutritional supplement prescribing practices                                                               | Kennelly, S.; Kennedy, N. P.; Corish, C. A.; Flanagan-Rughoobur, G.; Glennon-Slattery, C.; Sugrue, S.                                                                                                                                                                             | 2011 | Journal of Human Nutrition and Dietetics        | 24  | 5              | 496-504    | 10.1111/j.1365-277X.2011.01197.x                | #6650  | Exclusion reason: Wrong study design (not a RCT or a nonrandomized controlled study) |
| Sustaining a best-care practice in a nursing home                                                                                                                                            | Beck, C.; Heacock, P.; Mercer, S. O.; Doan, R.; O'Sullivan, P. S.; Stevenson, J. G.; Schnelle, J. F.; Hoskins, J. G.                                                                                                                                                              | 2005 | J Healthc Qual                                  | 27  | 4              | 16-May     |                                                 | #801   | Exclusion reason: Wrong population (not nurses)                                      |
| Synergistic Impact of Training Followed by On-Site Support on HIV Clinical Practice: A Mixed-Design Study in Uganda with Pre/Post and Cluster-Randomized Trial Components                    | Burnett, S. M.; Mubiru, N.; Imani, P.; Mbonye, M. K.; Fisher, L.; Colebunders, R.; Manabe, Y. C.; Weaver, M. R.                                                                                                                                                                   | 2018 | Journal of Acquired Immune Deficiency Syndromes | 77  | 5              | 467-475    | http://dx.doi.org/10.1097/QAI.00000000000001630 | #11799 | Exclusion reason: Wrong population (not nurses)                                      |
| System Level Informatics to Improve Triage Practices for Sickle Cell Disease Vaso-Occlusive Crisis: A Cluster Randomized Controlled Trial                                                    | Linton, E.; Souffront, K.; Gordon, L.; Loo, G. T.; Genes, N.; Glassberg, J.                                                                                                                                                                                                       | 2021 | J Emerg Nurs                                    | 47  | 5              | 742-751.e1 | 10.1016/j.jen.2021.05.007                       | #21207 | Exclusion reason: Wrong intervention (not an implementation intervention)            |
| Task shifting of antiretroviral treatment from doctors to primary-care nurses in South Africa (STRETCH): a pragmatic, parallel, cluster-randomised trial                                     | Fairall, L.; Bachmann, M. O.; Lombard, C.; Timmerman, V.; Uebel, K.; Zwarenstein, M.; Boulle, A.; Georgeu, D.; Colvin, C. J.; Lewin, S.; Faris, G.; Cornick, R.; Draper, B.; Tshabalala, M.; Kotze, E.; van Vuuren, C.; Steyn, D.; Chapman, R.; Bateman, E.                       | 2012 | Lancet                                          | 380 | 9845           | 889-98     | 10.1016/s0140-6736(12)60730-2                   | #6085  | Exclusion reason: Wrong intervention (not an implementation intervention)            |
| Teaching and maintaining behavior management skills in the nursing home                                                                                                                      | Burgio, L. D.; Stevens, A.; Burgio, K. L.; Roth, D. L.; Paul, P.; Gerstle, J.                                                                                                                                                                                                     | 2002 | Gerontologist                                   | 42  | 4              | 487-96     |                                                 | #2695  | Exclusion reason: Wrong population (not nurses);                                     |
| Teaching aseptic technique for central venous access under ultrasound guidance: a randomized trial comparing didactic training alone to didactic plus simulation-based training              | Latif, R. K.; Bautista, A. F.; Memon, S. B.; Smith, E. A.; Wang, C.; Wadhwa, A.; Carter, M. B.; Akca, O.                                                                                                                                                                          | 2012 | Anesth Analg                                    | 114 | 3              | 626-33     | 10.1213/ANE.0b013e3182405eb3                    | #5918  | Exclusion reason: Wrong population (not nurses);                                     |

#### Additional file 4. Excluded articles at full text assessment stage and reasons for exclusion.

|                                                                                                                                                                             |                                                                                                                                                    |      |                                    |    |       |              |                                |        |                                                                                      |
|-----------------------------------------------------------------------------------------------------------------------------------------------------------------------------|----------------------------------------------------------------------------------------------------------------------------------------------------|------|------------------------------------|----|-------|--------------|--------------------------------|--------|--------------------------------------------------------------------------------------|
| Teaching basic life support to nurses                                                                                                                                       | Makinen, M.; Castren, M.; Tolska, T.; Nurmi, J.; Niemi-Murola, L.                                                                                  | 2006 | Eur J Anaesthesiol                 | 23 | 4     | 327-31       | 10.1017/s0265021506000032      | #10445 | Exclusion reason: Wrong outcomes (not related to behaviour/clinical practice)        |
| Teaching nurses how to teach: an evaluation of a workshop on patient education                                                                                              | Lamiani, G.; Furey, A.                                                                                                                             | 2009 | Patient Educ Couns                 | 75 | 2     | 270-3        | 10.1016/j.pec.2008.09.022      | #8171  | Exclusion reason: Wrong study design (not a RCT or a nonrandomized controlled study) |
| Teaching nurses therapeutic conversation: a pilot study                                                                                                                     | Paxton, R.; Rhodes, D.; Crooks, I.                                                                                                                 | 1988 | J Adv Nurs                         | 13 | 3     | 401-4        |                                | #5500  | Exclusion reason: Wrong population (not nurses)                                      |
| Telemedicine enhances quality of forced spirometry in primary care                                                                                                          | Burgos, F.; Disdier, C.; de Santamaria, E. L.; Galdiz, B.; Roger, N.; Rivera, M. L.; Hervas, R.; Duran-Tauleria, E.; Garcia-Aymerich, J.; Roca, J. | 2012 | Eur Respir J                       | 39 | 6     | 1313-8       | 10.1183/09031936.00168010      | #6525  | Exclusion reason: Wrong population (not nurses)                                      |
| Testing the Impact of FFC-AL-EIT on Psychosocial and Behavioral Outcomes in Assisted Living                                                                                 | Resnick, B.; Boltz, M.; Galik, E.; Fix, S.; Holmes, S.; Zhu, S.; Barr, E.                                                                          | 2021 | J Am Geriatr Soc                   | 69 | 2     | 459-466      | 10.1111/jgs.16886              | #21838 | Exclusion reason: Wrong population (not nurses)                                      |
| Testing the Implementation of Function-focused Care in Assisted Living Settings                                                                                             | Resnick, B.; Boltz, M.; Galik, E.; Fix, S.; Holmes, S.; Zhu, S.; Barr, E.                                                                          | 2021 | J Am Med Dir Assoc                 | 22 | 8     | 1706-1713.e1 | 10.1016/j.jamda.2020.09.026    | #21837 | Exclusion reason: Wrong population (not nurses)                                      |
| The "ABCs of AD": A pilot test of an online educational module to increase use of the autonomic dysreflexia clinical practice guidelines among paramedic and nurse trainees | Tomasone, J. R.; Ginis, K. A. M.; Pulkkinen, W.; Krassioukov, A.                                                                                   | 2014 | Journal of Spinal Cord Medicine    | 37 | 5     | 598-607      | 10.1179/2045772314y.0000000253 | #15262 | Exclusion reason: Wrong population (not nurses)                                      |
| The American Medical Association Older Driver Curriculum for Health Professionals: Changes in Trainee Confidence, Attitudes, and Practice Behavior                          | Meuser, Thomas M.; Carr, David B.; Irmiter, Cheryl; Schwartzberg, Joanne G.; Ulfarsson, Gudmundur F.                                               | 2010 | Gerontology & Geriatrics Education | 31 | 4     | 290-309      |                                | #7189  | Exclusion reason: Wrong study design (not a RCT or a nonrandomized controlled study) |
| The CKD-DETECT study: An RCT aimed at improving intention to initiate a kidney health check in Australian practice nurses                                                   | Sinclair, P. M.; Kable, A.; Levett-Jones, T.; Holder, C.; Oldmeadow, C. J.                                                                         | 2019 | J Clin Nurs                        | 28 | 15-16 | 2745-2759    | 10.1111/jocn.14882             | #18118 | Exclusion reason: Wrong outcomes (not related to behaviour/clinical practice)        |
| The CLUES study: a cluster randomized clinical trial for the evaluation of cardiovascular guideline implementation in primary care                                          | Etxeberria, A.; Perez, I.; Alcorta, I.; Emparanza, J. I.; Ruiz de Velasco, E.; Iglesias, M. T.; Orozco-Beltran, D.; Rotaeche, R.                   | 2013 | BMC Health Serv Res                | 13 |       | 438          | 10.1186/1472-6963-13-438       | #17246 | Exclusion reason: Wrong population (not nurses)                                      |
| The collaborative practice model for bipolar disorder: design and implementation in a multi-site randomized controlled trial                                                | Bauer, M. S.                                                                                                                                       | 2001 | Bipolar Disord                     | 3  | 5     | 233-44       |                                | #3239  | Exclusion reason: Wrong study design (not a RCT or a nonrandomized controlled study) |
| The CPR outcomes of online medical video instruction versus on-scene medical instruction using simulated cardiac arrest stations                                            | Yuksen, C.; Sawatmongkornkul, S.; Tuangsirisup, J.; Sawanyawisuth, K.; Sittichanbuncha, Y.                                                         | 2016 | BMC Emerg Med                      | 16 | 1     | 25           | 10.1186/s12873-016-0092-3      | #13537 | Exclusion reason: Wrong outcomes (not related to behaviour/clinical practice)        |
| The Delta Project: increasing breast cancer screening among rural minority and older women by targeting rural healthcare providers                                          | Coleman, E. A.; Lord, J.; Heard, J.; Coon, S.; Cantrell, M.; Mohrmann, C.; O'Sullivan, P.                                                          | 2003 | Oncology Nursing Forum             | 30 | 4     | 669-677      | 10.1188/03.ONF.669-677         | #1754  | Exclusion reason: Wrong population (not nurses)                                      |

#### Additional file 4. Excluded articles at full text assessment stage and reasons for exclusion.

|                                                                                                                                                                   |                                                                                                                                                                                                                                                                                                    |      |                                                |     |              |         |                                             |        |                                                                                |
|-------------------------------------------------------------------------------------------------------------------------------------------------------------------|----------------------------------------------------------------------------------------------------------------------------------------------------------------------------------------------------------------------------------------------------------------------------------------------------|------|------------------------------------------------|-----|--------------|---------|---------------------------------------------|--------|--------------------------------------------------------------------------------|
| The design and conduct of a pragmatic cluster randomized trial of an advance care planning program for nursing home residents with dementia                       | Hickman, S. E.; Mitchell, S. L.; Hanson, L. C.; Tu, W.; Stump, T. E.; Unroe, K. T.                                                                                                                                                                                                                 | 2022 | Clin Trials                                    | 19  | 6            | 623-635 | 10.1177/17407745221108992                   | #20707 | Exclusion reason: Wrong population (not nurses)                                |
| The development and effect of the education program on hand hygiene and use of personal protective equipment                                                      | Jeong, I.; Kim, E. G.                                                                                                                                                                                                                                                                              | 2017 | Antimicrobial Resistance and Infection Control | 6   | Supplement 3 |         | http://dx.doi.org/10.1186/s13756-017-0201-4 | #12997 | Exclusion reason: Wrong type of paper (not a research article)                 |
| The dissemination of a smoking cessation program to 23 antenatal clinics: the predictors of initial program adoption by managers                                  | Cooke, M.; Mattick, R. P.; Campbell, E.                                                                                                                                                                                                                                                            | 1999 | Aust N Z J Public Health                       | 23  | 1            | 99-103  |                                             | #3461  | Exclusion reason: Wrong outcomes (not related to behaviour/clinical practice)  |
| The EDUCATE Study: A Continuing Education Exemplar for Clinical Practice Guideline Implementation                                                                 | Friedman, L.; Engelking, C.; Wickham, R.; Harvey, C.; Read, M.; Whitlock, K. B.                                                                                                                                                                                                                    | 2009 | Clinical Journal of Oncology Nursing           | 13  | 2            | 219-230 | 10.1188/09.Cjon.219-230                     | #8761  | Exclusion reason: Wrong outcomes (not related to behaviour/clinical practice)  |
| The educational impact of web-based and face-to-face patient deterioration simulation programs: An interventional trial                                           | Chung, Catherine; Cooper, Simon J.; Cant, Robyn P.; Connell, Cliff; McKay, Angela; Kinsman, Leigh; Gazula, Swapnali; Boyle, Jayne; Cameron, Amanda; Cash, Penny; Evans, Lisa; Kim, Jeong-Ah; Masud, Rana; McInnes, Denise; Norman, Lisa; Penz, Erika; Rotter, Thomas; Tanti, Erin; Breakspear, Tom | 2018 | Nurse Education Today                          | 64  |              | 93-98   | 10.1016/j.nedt.2018.01.037                  | #11553 | Exclusion reason: Wrong outcomes (not related to behaviour/clinical practice); |
| The effect of a checklist on the quality of post-anaesthesia patient handover: a randomized controlled trial                                                      | Salzwedel, C.; Bartz, H. J.; Kuhnelt, I.; Appel, D.; Haupt, O.; Maisch, S.; Schmidt, G. N.                                                                                                                                                                                                         | 2013 | Int J Qual Health Care                         | 25  | 2            | 176-81  | 10.1093/intqhc/mzt009                       | #16321 | Exclusion reason: Wrong outcomes (not related to behaviour/clinical practice)  |
| The Effect of a Freely Available Flipped Classroom Course on Health Care Worker Patient Safety Culture: A Prospective Controlled Study                            | Ling, Lowell; Gomersall, Charles David; Samy, Winnie; Joynt, Gavin Matthew; Leung, Czarina C. H.; Wai-Tat, Wong; Lee, Anna; Leung, Czarina Ch; Wong, Wai-Tat                                                                                                                                       | 2016 | Journal of Medical Internet Research           | 18  | 7            | 26-26   | 10.2196/jmir.5378                           | #14134 | Exclusion reason: Wrong population (not nurses)                                |
| The effect of a simulation-based training intervention on the performance of established critical care unit teams                                                 | Frengley, R. W.; Weller, J. M.; Torrie, J.; Dzendrowskyj, P.; Yee, B.; Paul, A. M.; Shulruf, B.; Henderson, K. M.                                                                                                                                                                                  | 2011 | Crit Care Med                                  | 39  | 12           | Nov-05  | 10.1097/CCM.0b013e3182282a98                | #7273  | Exclusion reason: Wrong population (not nurses)                                |
| The effect of a training course in aggression management on mental health nurses' perceptions of aggression: a cluster randomised controlled trial                | Needham, I.; Abderhalden, C.; Halfens, R. J.; Dassen, T.; Haug, H. J.; Fischer, J. E.                                                                                                                                                                                                              | 2005 | Int J Nurs Stud                                | 42  | 6            | 649-55  | 10.1016/j.ijnurstu.2004.10.003              | #517   | Exclusion reason: Wrong outcomes (not related to behaviour/clinical practice)  |
| The effect of an e-learning supported Train-the-Trainer programme on implementation of suicide guidelines in mental health care                                   | de Beurs, D. P.; de Groot, M. H.; de Keijser, J.; Mokkenstorm, J.; van Duijn, E.; de Winter, R. F.; Kerkhof, A. J.                                                                                                                                                                                 | 2015 | J Affect Disord                                | 175 |              | 446-53  | 10.1016/j.jad.2015.01.046                   | #15494 | Exclusion reason: Wrong population (not nurses)                                |
| The effect of an International competitive leaderboard on self-motivated simulation-based CPR practice among healthcare professionals: A randomized control trial | Chang, T. P.; Raymond, T.; Dewan, M.; MacKinnon, R.; Whitfill, T.; Harwayne-Gidansky, I.; Doughty, C.; Frisell, K.; Kessler, D.; Wolfe, H.; Auerbach, M.; Rutledge, C.; Mitchell, D.; Jani, P.; Walsh, C. M.                                                                                       | 2019 | Resuscitation                                  | 138 |              | 273-281 |                                             | #19068 | Exclusion reason: Wrong population (not nurses)                                |



#### Additional file 4. Excluded articles at full text assessment stage and reasons for exclusion.

|                                                                                                                                                                                           |                                                                                                                                                                                                                                                                         |      |                                             |    |       |                 |                               |        |                                                                                      |
|-------------------------------------------------------------------------------------------------------------------------------------------------------------------------------------------|-------------------------------------------------------------------------------------------------------------------------------------------------------------------------------------------------------------------------------------------------------------------------|------|---------------------------------------------|----|-------|-----------------|-------------------------------|--------|--------------------------------------------------------------------------------------|
| The Effect of an Intimate Partner Violence Against Women Training Program Based on the Theory of Planned Behavior on the Approaches of Nurses and Midwives: A Randomized Controlled Study | Koçtu, N.; Toraman, A. U.                                                                                                                                                                                                                                               | 2022 | J Interpers Violence                        | 37 | 17-18 | Np16157-np16179 | 10.1177/08862605211022064     | #21044 | Exclusion reason: Wrong population (not nurses)                                      |
| The Effect Of Clinician Feedback Interventions On Opioid Prescribing                                                                                                                      | Navathe, Amol S.; Liao, Joshua M.; Yan, Xiaowei S.; Delgado, M. Kit; Isenberg, William M.; Landa, Howard M.; Bond, Barbara L.; Small, Dylan S.; Raeshide, Charles A. L.; Zijun, Shen; Pepe, Rebecca S.; Refai, Farah; Lei, Victor J.; Volpp, Kevin G.; Patel, Mitesh S. | 2022 | Health Affairs                              | 41 | 3     | 424-433         | 10.1377/hlthaff.2021.01407    | #21547 | Exclusion reason: Wrong population (not nurses)                                      |
| The effect of education on hypothetical and actual oxygen administration decisions                                                                                                        | Considine, J.; Botti, M.; Thomas, S.                                                                                                                                                                                                                                    | 2007 | Nurse Educ Today                            | 27 | 6     | 651-60          | 10.1016/j.nedt.2006.10.001    | #10293 | Exclusion reason: Wrong outcomes (not related to behaviour/clinical practice)        |
| The effect of education on knowledge and management of elder abuse: a randomized controlled trial                                                                                         | Richardson, B.; Kitchen, G.; Livingston, G.                                                                                                                                                                                                                             | 2002 | Age Ageing                                  | 31 | 5     | 335-41          |                               | #2116  | Exclusion reason: Wrong outcomes (not related to behaviour/clinical practice)        |
| The effect of educational intervention on use of psychotropics in defined daily doses and related costs: A randomized controlled trial                                                    | Ulla L, Aalto; Mervi, Rantsi; Anna-Liisa, Juola; Hannu, Kautiainen; Kaisu H, Pitkälä                                                                                                                                                                                    | 2022 | SCANDINAVIAN JOURNAL OF PRIMARY HEALTH CARE | 40 | 2     | 246-252         | 10.1080/02813432.2022.2074055 | #22288 | Exclusion reason: Wrong outcomes (not related to behaviour/clinical practice)        |
| The effect of evidence-based nursing education on nurses' clinical decision making: A randomized controlled trial                                                                         | Astan, P. G.; Goli, R.; Maslakh, M. H.; Rasouli, J.; Alilu, L.                                                                                                                                                                                                          | 2022 | HEALTH SCIENCE REPORTS                      | 5  | 5     |                 | 10.1002/hsr.2837              | #19857 | Exclusion reason: Wrong outcomes (not related to behaviour/clinical practice)        |
| The Effect of Implementation of a Pain Monitoring Protocol on the Pain Intensity in the Intensive Care Unit Semiconscious Patients                                                        | Akhond, Majid; Froutan, Razieh; Malekzadeh, Javad; Mazlom, Seyed Reza                                                                                                                                                                                                   | 2017 | Journal of Evidence-based Care              | 7  | 2     | 37-45           | 10.22038/ebcj.2017.23797.1504 | #13138 | Exclusion reason: Wrong outcomes (not related to behaviour/clinical practice)        |
| The effect of interprofessional education on interprofessional professionalism behaviors of the surgical team members                                                                     | Hosseinpour, Azam; Keshmiri, Fatemeh; Jambarsang, Sara; Jabinian, Fatemeh; Shiryazdi, Seyed Mostafa                                                                                                                                                                     | 2022 | BMC NURSING                                 | 21 | 1     | 08-Jan          | 10.1186/s12912-022-01015-9    | #20750 | Exclusion reason: Wrong population (not nurses)                                      |
| The effect of nurse empowerment educational program on patient safety culture: a randomized controlled trial                                                                              | Amiri, M.; Khademian, Z.; Nikandish, R.                                                                                                                                                                                                                                 | 2018 | BMC Med Educ                                | 18 | 1     | 158             | 10.1186/s12909-018-1255-6     | #12691 | Exclusion reason: Wrong outcomes (not related to behaviour/clinical practice)        |
| The effect of random voice hand hygiene messages delivered by medical, nursing, and infection control staff on hand hygiene compliance in intensive care                                  | McGuckin, M.; Shubin, A.; McBride, P.; Lane, S.; Strauss, K.; Butler, D.; Pitman, A.                                                                                                                                                                                    | 2006 | Am J Infect Control                         | 34 | 10    | 673-5           | 10.1016/j.ajic.2006.01.013    | #10428 | Exclusion reason: Wrong study design (not a RCT or a nonrandomized controlled study) |
| The effect of simulation-based education on parental management of fever in children: a quasi-experimental study                                                                          | Tavan, Asghar; Monemi, Elnaz; Keshavarz, Fateme; Kazemi, Behrooz; Nematollahi, Monirsadat                                                                                                                                                                               | 2022 | BMC NURSING                                 | 21 | 1     | 07-Jan          | 10.1186/s12912-022-00938-7    | #22206 | Exclusion reason: Wrong population (not nurses)                                      |
| The effect of staff training on agitation and use of restraint in nursing home residents with dementia: a single-blind, randomized controlled trial                                       | Testad, I.; Ballard, C.; Bronnick, K.; Aarsland, D.                                                                                                                                                                                                                     | 2010 | J Clin Psychiatry                           | 71 | 1     | Jun-80          | 10.4088/JCP.09m05486oli       | #7137  | Exclusion reason: Wrong population (not nurses)                                      |

#### Additional file 4. Excluded articles at full text assessment stage and reasons for exclusion.

|                                                                                                                                                                                             |                                                                                                                                                                                                 |      |                                          |     |    |                    |                                                     |        |                                                                                      |
|---------------------------------------------------------------------------------------------------------------------------------------------------------------------------------------------|-------------------------------------------------------------------------------------------------------------------------------------------------------------------------------------------------|------|------------------------------------------|-----|----|--------------------|-----------------------------------------------------|--------|--------------------------------------------------------------------------------------|
| The effect of staff training on the use of restraint in dementia: a single-blind randomised controlled trial                                                                                | Testad, I.; Aasland, A. M.; Aarsland, D.                                                                                                                                                        | 2005 | Int J Geriatr Psychiatry                 | 20  | 6  | 587-90             | 10.1002/gps.1329                                    | #378   | Exclusion reason: Wrong population (not nurses)                                      |
| The effectiveness of an integrated pain management program for older persons and staff in nursing homes                                                                                     | Tse, M. M.; Vong, S. K.; Ho, S. S.                                                                                                                                                              | 2012 | Arch Gerontol Geriatr                    | 54  | 2  | e203-12            | 10.1016/j.archger.2011.04.015                       | #17092 | Exclusion reason: Wrong population (not nurses)                                      |
| The Effectiveness of Four Translation Strategies on Nurses' Adoption of an Evidence-Based Bladder Protocol                                                                                  | Frasure, J. S.                                                                                                                                                                                  | 2014 | Journal of Neuroscience Nursing          | 46  | 4  | 218-226            | 10.1097/jnn.000000000000069                         | #15952 | Exclusion reason: Wrong study design (not a RCT or a nonrandomized controlled study) |
| The effectiveness of guideline implementation strategies on improving antipsychotic medication management for schizophrenia                                                                 | Owen, R. R.; Hudson, T.; Thrush, C.; Thapa, P.; Armitage, T.; Landes, R. D.                                                                                                                     | 2008 | Med Care                                 | 46  | 7  | 686-91             | 10.1097/MLR.0b013e3181653d43                        | #8887  | Exclusion reason: Wrong population (not nurses)                                      |
| The effectiveness of the care programme for the last days of life (CAREFUL) to improve comfort and quality of care in acute geriatric hospital wards: A cluster randomized controlled trial | Beernaert, K.; Smets, T.; Cohen, J.; Verhofstede, R.; Costantini, M.; Eecloo, K.; Van Den Noortgate, N.; Deliens, L.                                                                            | 2016 | Journal of Pain and Symptom Management   | 52  | 6  | e6                 | http://dx.doi.org/10.1016/j.jpainsymman.2016.10.004 | #14708 | Exclusion reason: Wrong type of paper (not a research article)                       |
| The effectiveness of the Pain Resource Nurse Program to improve pain management in the hospital setting: A cluster randomized controlled trial                                              | Gunnarsdottir, Sigrídur; Zo'vga, Sigrídur; Serlin, Ronald C.; Sveinsdottir, Herdis; Hafsteinsdottir, Elin Johanna Gudrun; Fridriksdottir, Nanna; Gretarsdottir, Elfa Tholl; Ward, Sandra Evelyn | 2017 | International Journal of Nursing Studies | 75  |    | 83-90              | 10.1016/j.ijnurstu.2017.07.009                      | #12146 | Exclusion reason: Wrong outcomes (not related to behaviour/clinical practice)        |
| The effectiveness of web-based and face-to-face continuing education methods on nurses' knowledge about AIDS: a comparative study                                                           | Khatony, A.; Nayery, N. D.; Ahmadi, F.; Haghani, H.; Vehvilainen-Julkunen, K.                                                                                                                   | 2009 | BMC Medical Education                    | 9   |    | 41                 | 10.1186/1472-6920-9-41                              | #17369 | Exclusion reason: Wrong outcomes (not related to behaviour/clinical practice)        |
| The effects of a 24-h psychological training program on attitudes, communication skills and occupational stress in oncology: a randomised study                                             | Razavi, D.; Delvaux, N.; Marchal, S.; Bredart, A.; Farvacques, C.; Paesmans, M.                                                                                                                 | 1993 | Eur J Cancer                             | 29a | 13 | 1858-63            |                                                     | #5012  | Exclusion reason: Wrong outcomes (not related to behaviour/clinical practice)        |
| The effects of computer-based training on immediate and residual learning of nursing facility staff                                                                                         | Harrington, S. S.; Walker, B. L.                                                                                                                                                                | 2004 | J Contin Educ Nurs                       | 35  | 4  | 154-63; quiz 186-7 |                                                     | #1559  | Exclusion reason: Wrong outcomes (not related to behaviour/clinical practice)        |
| The effects of interactive E-learning on delirium recognition ability and delirium-related strain of care among critical care nurses                                                        | Najafi Ghezalje, T.; Rahnamaei, F.; Omrani, S.; Haghani, S.                                                                                                                                     | 2020 | Journal of the Intensive Care Society.   |     |    |                    |                                                     | #18509 | Exclusion reason: Wrong outcomes (not related to behaviour/clinical practice)        |
| The effects of intervention based on supportive leadership behaviour on Iranian nursing leadership performance: a randomized controlled trial                                               | Shirazi, M.; Emami, A. H.; Mirmoosavi, S. J.; Alavinia, S. M.; Zamanian, H.; Fathollahbeigi, F.; Masiello, I.                                                                                   | 2016 | J Nurs Manag                             | 24  | 3  | 400-8              | 10.1111/jonm.12335                                  | #13359 | Exclusion reason: Wrong outcomes (not related to behaviour/clinical practice)        |
| The effects of nutritional guideline implementation on nursing home staff performance: a controlled trial                                                                                   | T'ðrmv\$, Johanna; Winblad, Ulrika; Saletti, Anja; Cederholm, Tommy                                                                                                                             | 2018 | Scandinavian Journal of Caring Sciences  | 32  | 2  | 622-633            | 10.1111/scs.12487                                   | #11029 | Exclusion reason: Wrong population (not nurses)                                      |
| The effects of two teaching methods upon staff nurses learning and applying problem oriented charting                                                                                       | Johnson-Forsythe, G.; Merkel, S.                                                                                                                                                                | 1977 | Abstracts of Hospital                    | 14  | 2  |                    |                                                     | #5243  | Exclusion reason: Wrong type of paper (not a research article)                       |

#### Additional file 4. Excluded articles at full text assessment stage and reasons for exclusion.

|                                                                                                                                                                                                                                                          |                                                                                                                                                                                                                                                             |      | Management Studies          |     |    |          |                                |        |                                                                                      |
|----------------------------------------------------------------------------------------------------------------------------------------------------------------------------------------------------------------------------------------------------------|-------------------------------------------------------------------------------------------------------------------------------------------------------------------------------------------------------------------------------------------------------------|------|-----------------------------|-----|----|----------|--------------------------------|--------|--------------------------------------------------------------------------------------|
| The effects of virtual intravenous and patient simulator training compared to the traditional approach of teaching nurses: a research project on peripheral IV catheter                                                                                  | Wilfong, Donamarie N.; Falsetti, Donna J.; McKinnon, Jewel L.; Daniel, Laura H.; Wan, Qingping Ching-Ping                                                                                                                                                   | 2011 | Journal of Infusion Nursing | 34  | 1  | 55-62    | 10.1097/NAN.0b013e31820219e2   | #6123  | Exclusion reason: Wrong outcomes (not related to behaviour/clinical practice)        |
| The efficacy of visual cues to improve hand hygiene compliance                                                                                                                                                                                           | Nevo, I.; Fitzpatrick, M.; Thomas, R. E.; Gluck, P. A.; Lenchus, J. D.; Arheart, K. L.; Birnbach, D. J.                                                                                                                                                     | 2010 | Simul Healthc               | 5   | 6  | 325-31   | 10.1097/SIH.0b013e3181f69482   | #7742  | Exclusion reason: Wrong population (not nurses)                                      |
| The emergency department action in smoking cessation (EDASC) trial: impact on cessation outcomes                                                                                                                                                         | Katz, D. A.; Holman, J. E.; Nugent, A. S.; Baker, L. J.; Johnson, S. R.; Hillis, S. L.; Tinkelman, D. G.; Titler, M. G.; Vander Weg, M. W.                                                                                                                  | 2013 | Nicotine Tob Res            | 15  | 6  | 1032-43  | 10.1093/ntr/nts219             | #16655 | Exclusion reason: Wrong study design (not a RCT or a nonrandomized controlled study) |
| The impact of a brief lifestyle intervention delivered by generalist community nurses (CN SNAP trial)                                                                                                                                                    | Harris, M. F.; Chan, B. C.; Laws, R. A.; Williams, A. M.; Davies, G. P.; Jayasinghe, U. W.; Fanaian, M.; Orr, N.; Milat, A.                                                                                                                                 | 2013 | BMC Public Health           | 13  |    | 375      | 10.1186/1471-2458-13-375       | #16756 | Exclusion reason: Wrong outcomes (not related to behaviour/clinical practice)        |
| The impact of a training programme incorporating the conceptual framework of the International Classification of Functioning (ICF) on behaviour regarding interprofessional practice in Rwandan health professionals: A cluster randomized control trial | Sagahutu, J. B.; Kagwiza, J.; Cilliers, F.; Jelsma, J.                                                                                                                                                                                                      | 2020 | PLoS One                    | 15  | 2  | e0226247 | 10.1371/journal.pone.0226247   | #18228 | Exclusion reason: Wrong population (not nurses)                                      |
| The impact of an educational intervention for elderly care nurses on care recipients' and family relatives' ratings of quality of care: a prospective, controlled intervention study                                                                     | Hasson, H.; Arnetz, J. E.                                                                                                                                                                                                                                   | 2008 | Int J Nurs Stud             | 45  | 2  | 166-79   | 10.1016/j.ijnurstu.2006.09.001 | #9173  | Exclusion reason: Wrong outcomes (not related to behaviour/clinical practice)        |
| The impact of an educational intervention on nursing staff ratings of quality of older people care: a prospective, controlled intervention study                                                                                                         | Hasson, H.; Arnetz, J. E.                                                                                                                                                                                                                                   | 2009 | Int J Nurs Stud             | 46  | 4  | 470-8    | 10.1016/j.ijnurstu.2008.04.007 | #8357  | Exclusion reason: Wrong outcomes (not related to behaviour/clinical practice)        |
| The impact of an educational program on improving diabetes knowledge and changing behaviors of nurses in long-term care facilities                                                                                                                       | Parker, M. T.; Leggett-Frazier, N.; Vincent, P. A.; Swanson, M. S.                                                                                                                                                                                          | 1995 | Diabetes Educ               | 21  | 6  | 541-5    | 10.1177/014572179502100608     | #4744  | Exclusion reason: Wrong population (not nurses)                                      |
| The impact of continuous quality improvement on coverage of antenatal HIV care tests in rural South Africa: Results of a stepped-wedge cluster-randomised controlled implementation trial                                                                | Manisha Yapa, H.; De Neve, J. W.; Chetty, T.; Herbst, C.; Post, F. A.; Jiamsakul, A.; Geldsetzer, P.; Harling, G.; Dhlomo-Mphatswe, W.; Moshabela, M.; Matthews, P.; Ogbuoi, O.; Tanser, F.; Gareta, D.; Herbst, K.; Pillay, D.; Wyke, S.; Barnighausen, T. | 2020 | Plos Medicine               | 17  | 10 |          |                                | #17459 | Exclusion reason: Wrong outcomes (not related to behaviour/clinical practice)        |
| The Impact of Nursing Delirium Preventive Interventions in the ICU: A Multicenter Cluster-randomized Controlled Clinical Trial                                                                                                                           | Rood, P. J. T.; Zegers, M.; Ramnarain, D.; Koopmans, M.; Klarenbeek, T.; Ewalds, E.; van der Steen, M. S.; Oldenbeuving, A. W.; Kuiper, M. A.; Teerenstra, S.; Adang, E.; van Loon, L. M.; Wassenaar, A.; Vermeulen, H.; Pickkers, P.; van den Boogaard, M. | 2021 | Am J Respir Crit Care Med   | 204 | 6  | 682-691  | 10.1164/rccm.202101-0082OC     | #21882 | Exclusion reason: Wrong intervention (not an implementation intervention)            |

#### Additional file 4. Excluded articles at full text assessment stage and reasons for exclusion.

|                                                                                                                                                                                   |                                                                                                                                                                                                                                                                          |      |                                        |     |                 |               |                                                       |        |                                                                                      |
|-----------------------------------------------------------------------------------------------------------------------------------------------------------------------------------|--------------------------------------------------------------------------------------------------------------------------------------------------------------------------------------------------------------------------------------------------------------------------|------|----------------------------------------|-----|-----------------|---------------|-------------------------------------------------------|--------|--------------------------------------------------------------------------------------|
| The impact of the International Nosocomial Infection Control Consortium (INICC) multicenter, multidimensional hand hygiene approach in two cities of India                        | Chakravarthy, M.; Myatra, S. N.; Rosenthal, V. D.; Udawadia, F. E.; Gokul, B. N.; Divatia, J. V.; Poojary, A.; Sukanya, R.; Kelkar, R.; Koppikar, G.; Pushparaj, L.; Biswas, S.; Bhandarkar, L.; Raut, S.; Jadhav, S.; Sannpat, S.; Chavan, N.; Bahirune, S.; Durgad, S. | 2015 | Journal of Infection and Public Health | 8   | 2               | 177-186       | 10.1016/j.jiph.2014.08.004                            | #15572 | Exclusion reason: Wrong study design (not a RCT or a nonrandomized controlled study) |
| The interaction between teamwork and leadership in pediatric resuscitation                                                                                                        | Delaloye, N.; Grant, E.; Krueger, C.; Deacon, A.; O'Neill, T.; Koot, D.; Gilfoyle, E.                                                                                                                                                                                    | 2016 | Critical Care Medicine                 | 44  | 12 Supplement 1 | 156           | http://dx.doi.org/10.1097/01.ccm.0000508998.21691.36  | #14078 | Exclusion reason: Wrong type of paper (not a research article)                       |
| The introduction of a nursing guideline on depression at psychogeriatric nursing home wards: effects on certified nurse assistants                                                | Verkaik, R.; Francke, A. L.; van Meijel, B.; Spreeuwenberg, P. M.; Ribbe, M. W.; Bensing, J. M.                                                                                                                                                                          | 2011 | Int J Nurs Stud                        | 48  | 6               | 710-9         | 10.1016/j.ijnurstu.2010.06.007                        | #6160  | Exclusion reason: Wrong population (not nurses)                                      |
| The introduction of a rapid response system in acute hospitals: A pragmatic stepped wedge cluster randomised controlled trial                                                     | Haegdorens, F.; Van Bogaert, P.; Roelant, E.; De Meester, K.; Misselyn, M.; Wouters, K.; Monsieurs, K. G.                                                                                                                                                                | 2018 | Resuscitation                          | 129 |                 | 127-134       | http://dx.doi.org/10.1016/j.resuscitation.2018.04.018 | #11993 | Exclusion reason: Wrong outcomes (not related to behaviour/clinical practice)        |
| The practical use of the latest standards of electrocardiography (PULSE) trial: Nursing-focused intervention improves nurses' knowledge and quality of ECG monitoring             | Funk, M.; Fennie, K. P.; Stephens, K.; May, J. L.; Winkler, C.; Chang, P. S.; Feder, S.; Knudson, K.; Bovino, L. R.; Turkman, Y.; Drew, B. J.                                                                                                                            | 2014 | Circulation                            | 130 | SUPPL. 2        |               |                                                       | #15945 | Exclusion reason: Wrong type of paper (not a research article)                       |
| The Trial to Reduce Antimicrobial Use in Nursing Home Residents With Alzheimer Disease and Other Dementias (TRAIN-AD): A Cluster Randomized Clinical Trial                        | Mitchell, S. L.; D'Agata, E. M. C.; Hanson, L. C.; Loizeau, A. J.; Habtemariam, D. A.; Tsai, T.; Anderson, R. A.; Shaffer, M. L.                                                                                                                                         | 2021 | JAMA Intern Med                        | 181 | 9               | 1174-1182     | 10.1001/jamainternmed.2021.3098                       | #21438 | Exclusion reason: Wrong outcomes (not related to behaviour/clinical practice)        |
| TIME to reduce agitation in persons with dementia in nursing homes. A process evaluation of a complex intervention                                                                | Lichtwarck, Bjørn; Myhre, Janne; Selbaek, Geir; Kirkevold, Øyvind; Rokstad, Anne Marie Mork; Benth, Jørn; ratfó ≈taltytfó; Bergh, Sverre                                                                                                                                 | 2019 | BMC Health Services Research           | 19  | 1               | N.PAG - N.PAG | 10.1186/s12913-019-4168-0                             | #10855 | Exclusion reason: Wrong population (not nurses)                                      |
| Top care-a multi component intervention to improve adherence to chronic opioid therapy guidelines and reduce opioid misuse in primary care: A cluster randomized controlled trial | Liebschutz, J. M.; Xuan, Z.; Shanahan, C. W.; Laroche, M.; Keosaian, J.; Alford, D. P.; Weiss, R.; Samet, J. H.; Lasser, K. E.                                                                                                                                           | 2017 | Journal of General Internal Medicine   | 32  | 2 Supplement 1  | S357          |                                                       | #12030 | Exclusion reason: Wrong type of paper (not a research article)                       |
| Training and support for nursing home staff reduced neuroleptic drug use and did not increase aggression in residents with dementia                                               | Coker, E.                                                                                                                                                                                                                                                                | 2006 | Evidence Based Nursing                 | 9   | 4               | 122-122       |                                                       | #159   | Exclusion reason: Wrong type of paper (not a research article)                       |
| Training family physicians and primary care nurses improves diagnostic assessment of dementia: Results of a randomized controlled trial                                           | Perry, M.                                                                                                                                                                                                                                                                | 2011 | Alzheimer's and Dementia               | 7   | 4 SUPPL. 1      | S498          | http://dx.doi.org/10.1016/j.jalz.2011.05.2393         | #6915  | Exclusion reason: Wrong type of paper (not a research article)                       |
| Training in dementia care: a cluster-randomized controlled trial of a training program for nursing home staff in Germany                                                          | Kuske, B.; Luck, T.; Hanns, S.; Matschinger, H.; Angermeyer, M. C.; Behrens, J.; Riedel-Heller, S. G.                                                                                                                                                                    | 2009 | Int Psychogeriatr                      | 21  | 2               | 295-308       | 10.1017/s1041610208008387                             | #8175  | Exclusion reason: Wrong population (not nurses)                                      |
| Training intervention for health care staff in the provision of existential support to                                                                                            | Henoch, I.; Danielson, E.; Strang, S.; Browall, M.; Melin-Johansson, C.                                                                                                                                                                                                  | 2013 | J Pain Symptom Manage                  | 46  | 6               | 785-94        | 10.1016/j.jpainsymman.2013.01.013                     | #16731 | Exclusion reason: Wrong outcomes (not related to                                     |

#### Additional file 4. Excluded articles at full text assessment stage and reasons for exclusion.

|                                                                                                                                                                         |                                                                                                                                                                                         |      |                                                                  |     |   |         |                                  |        |                                                                                      |
|-------------------------------------------------------------------------------------------------------------------------------------------------------------------------|-----------------------------------------------------------------------------------------------------------------------------------------------------------------------------------------|------|------------------------------------------------------------------|-----|---|---------|----------------------------------|--------|--------------------------------------------------------------------------------------|
| patients with cancer: a randomized, controlled study                                                                                                                    |                                                                                                                                                                                         |      |                                                                  |     |   |         |                                  |        | behaviour/clinical practice)                                                         |
| Training nursing home care staff to recognise psychopathology improves their ability to identify depressed residents                                                    | Burgio, L.                                                                                                                                                                              | 2006 | Evidence Based Mental Health                                     | 9   | 1 | 18-18   |                                  | #205   | Exclusion reason: Wrong type of paper (not a research article)                       |
| Training nursing home staff to improve psychosocial care reduces neuroleptic use in people with dementia without an increase in agitation                               | Byrne, G. J.                                                                                                                                                                            | 2006 | Evidence Based Mental Health                                     | 9   | 4 | 103-103 |                                  | #499   | Exclusion reason: Wrong type of paper (not a research article)                       |
| Training practitioners to deliver opportunistic multiple behaviour change counselling in primary care: a cluster randomised trial                                       | Butler, C. C.; Simpson, S. A.; Hood, K.; Cohen, D.; Pickles, T.; Spanou, C.; McCambridge, J.; Moore, L.; Randell, E.; Alam, M. F.; Kinnersley, P.; Edwards, A.; Smith, C.; Rollnick, S. | 2013 | BMJ                                                              | 346 |   | f1191   | 10.1136/bmj.f1191                | #16875 | Exclusion reason: Wrong population (not nurses)                                      |
| Training Staff to Implement Brief Stimulus Preference Assessments                                                                                                       | Weldy, Christina R.; Rapp, John T.; Capocasa, Kelli                                                                                                                                     |      | Journal of Applied Behavior Analysis                             | 47  | 1 | 214-218 |                                  | #5313  | Exclusion reason: Wrong population (not nurses)                                      |
| Training Support Staff to Modify Fluids to Appropriate Safe Consistencies for Adults with Intellectual Disabilities and Dysphagia: An Efficacy Study                    | Chadwick, D. D.; Stubbs, J.; Fovargue, S.; Anderson, D.; Stacey, G.; Tye, S.                                                                                                            |      | Journal of Intellectual Disability Research                      | 58  | 1 | 84-98   |                                  | #5808  | Exclusion reason: Wrong population (not nurses)                                      |
| Transferring Central Line Care Evidence Into Practice on Pediatric Acute Care Units                                                                                     | McCaskey, M. S.                                                                                                                                                                         | 2013 | Journal of Pediatric Nursing-Nursing Care of Children & Families | 28  | 6 | E57-E63 | 10.1016/j.pedn.2013.02.027       | #16603 | Exclusion reason: Wrong study design (not a RCT or a nonrandomized controlled study) |
| Translating evidence-based falls prevention into clinical practice in nursing facilities: Results and lessons from a quality improvement collaborative                  | Colon-Emeric, C.; Schenck, A.; Gorospe, J.; McArdle, J.; Dobson, L.; Deporter, C.; McConnell, E.                                                                                        | 2006 | J Am Geriatr Soc                                                 | 54  | 9 | 1414-8  | 10.1111/j.1532-5415.2006.00853.x | #155   | Exclusion reason: Wrong study design (not a RCT or a nonrandomized controlled study) |
| Translating Pressure Ulcer Prevention Into Intensive Care Nursing Practice                                                                                              | Tayyib, Nahla; Coyer, Fiona                                                                                                                                                             | 2017 | Journal of Nursing Care Quality                                  | 32  | 1 | 14-Jun  | 10.1097/NCQ.0000000000000199     | #12378 | Exclusion reason: Wrong study design (not a RCT or a nonrandomized controlled study) |
| Translating the evidence-based NICU COPE program for parents of premature infants into clinical practice: impact on nurses' evidence-based practice and lessons learned | Melnyk, B. M.; Bullock, T.; McGrath, J.; Jacobson, D.; Kelly, S.; Baba, L.                                                                                                              | 2010 | J Perinat Neonatal Nurs                                          | 24  | 1 | 74-80   | 10.1097/JPN.0b013e3181ce314b     | #7190  | Exclusion reason: Wrong population (not nurses)                                      |
| Translation squared: improving asthma care for high-disparity populations through a safety net practice-based research network                                          | Daniels, E. C.; Bacon, J.; Denasio, S.; Fry, Y. W.; Murray, V.; Quarshie, A.; Rust, G.                                                                                                  | 2005 | J Asthma                                                         | 42  | 6 | 499-505 | 10.1081/JAS-67598                | #22600 | Exclusion reason: Wrong population (not nurses)                                      |
| Translation to practice: a randomised, controlled study of an evidence-based booklet for breast-care nurses in the United Kingdom                                       | Kirshbaum, M.                                                                                                                                                                           | 2008 | Worldviews Evid Based Nurs                                       | 5   | 2 | 60-74   | 10.1111/j.1741-6787.2008.00113.x | #9026  | Exclusion reason: Wrong outcomes (not related to behaviour/clinical practice)        |

#### Additional file 4. Excluded articles at full text assessment stage and reasons for exclusion.

|                                                                                                                                                                    |                                                                                                                                              |      |                                                        |    |              |           |                                                                                       |        |                                                                                      |
|--------------------------------------------------------------------------------------------------------------------------------------------------------------------|----------------------------------------------------------------------------------------------------------------------------------------------|------|--------------------------------------------------------|----|--------------|-----------|---------------------------------------------------------------------------------------|--------|--------------------------------------------------------------------------------------|
| Trivia-psychotica: the development and evaluation of an educational game for the revision of psychiatric disorders in a nurse training programme                   | Kelly, S.                                                                                                                                    | 1995 | J Psychiatr Ment Health Nurs                           | 2  | 6            | 366-7     |                                                                                       | #4782  | Exclusion reason: Wrong outcomes (not related to behaviour/clinical practice)        |
| Urinary Tract Infection Knowledge of Long-Term Care Nursing Staff: The Effect of an Educational Intervention                                                       | Viner, Sophia                                                                                                                                | 2020 | Urologic Nursing                                       | 40 | 1            | 21-Jul    | 10.7257/1053-816X.2020.40.1.7                                                         | #17865 | Exclusion reason: Wrong study design (not a RCT or a nonrandomized controlled study) |
| Use of a computerized guideline for glucose regulation in the intensive care unit improved both guideline adherence and glucose regulation                         | Rood, E.; Bosman, R. J.; van der Spoel, J. I.; Taylor, P.; Zandstra, D. F.                                                                   | 2005 | J Am Med Inform Assoc                                  | 12 | 2            | 172-80    | 10.1197/jamia.M1598                                                                   | #22604 | Exclusion reason: Wrong study design (not a RCT or a nonrandomized controlled study) |
| Use of a training program to enhance NICU nurses' cognitive abilities for assessing preterm infant behaviors and offering supportive interventions                 | Liaw, J. J.                                                                                                                                  | 2003 | J Nurs Res                                             | 11 | 2            | 82-92     |                                                                                       | #1262  | Exclusion reason: Wrong outcomes (not related to behaviour/clinical practice)        |
| Use of an automated decision support tool optimizes clinicians' ability to interpret and appropriately respond to structured self-monitoring of blood glucose data | Rodbard, H. W.; Schnell, O.; Unger, J.; Rees, C.; Amstutz, L.; Parkin, C. G.; Jelsovsky, Z.; Wegmann, N.; Axel-Schweitzer, M.; Wagner, R. S. | 2012 | Diabetes Care                                          | 35 | 4            | 693-8     | 10.2337/dc11-1351                                                                     | #17214 | Exclusion reason: Wrong population (not nurses)                                      |
| Use of an automated hand hygiene compliance system by emergency room nurses and technicians is associated with decreased employee absenteeism                      | Strauch, J.; Braun, T. M.; Short, H.                                                                                                         | 2020 | American Journal of Infection Control                  | 48 | 5            | 575-577   | 10.1016/j.ajic.2019.11.023                                                            | #17740 | Exclusion reason: Wrong study design (not a RCT or a nonrandomized controlled study) |
| Use of Electronic and Paper-based Standardized Nursing Care Plans to Improve Nurses' Documentation Quality in a Nigerian Teaching Hospital                         | Adereti, Chinma Stella; Olaogun, Adenike Ayobola                                                                                             | 2019 | International Journal of Nursing Knowledge             | 30 | 4            | 219-227   | 10.1111/2047-3095.12232                                                               | #19684 | Exclusion reason: Wrong intervention (not an implementation intervention)            |
| Use of High-Fidelity Simulation to Enhance Interdisciplinary Collaboration and Reduce Patient Falls                                                                | Bursiek, A. A.; Hopkins, M. R.; Breitkopf, D. M.; Grubbs, P. L.; Joswiak, M. E.; Klipfel, J. M.; Johnson, K. M.                              | 2020 | Journal of Patient Safety                              | 16 | 3            | 245-250   |                                                                                       | #19113 | Exclusion reason: Wrong study design (not a RCT or a nonrandomized controlled study) |
| Using lean six sigma to decrease delivery time of blood to the operating room                                                                                      | Wong, C.; Stevens, W. T.; Garvanovic, S.; Lauer, R.; Ramsingh, D.; Gatling, J.                                                               | 2016 | Transfusion                                            | 56 | Supplement 4 | 215A-216A | <a href="http://dx.doi.org/10.1111/trf.13807">http://dx.doi.org/10.1111/trf.13807</a> | #13563 | Exclusion reason: Wrong type of paper (not a research article)                       |
| Using simulation to enhance knowledge and confidence                                                                                                               | Corbridge, S. J.; McLaughlin, R.; Tiffen, J.; Wade, L.; Templin, R.; Corbridge, T. C.                                                        | 2008 | Nurse Pract                                            | 33 | 6            | 03-Dec    |                                                                                       | #9250  | Exclusion reason: Wrong study design (not a RCT or a nonrandomized controlled study) |
| Using the internet to deliver education on drug safety                                                                                                             | Franklin, B. D.; O'Grady, K.; Parr, J.; Walton, I.                                                                                           | 2006 | BMJ Quality & Safety                                   | 15 | 5            | 329-333   | 10.1136/qshc.2005.017608                                                              | #17372 | Exclusion reason: Wrong study design (not a RCT or a nonrandomized controlled study) |
| Using Virtual Patient Simulations to Prepare Primary Health Care Professionals to Conduct Substance Use and Mental Health Screening and Brief Intervention         | Albright, Glenn; Bryan, Craig; Adam, Cyrille; McMillan, Jeremiah; Shockley, Kristen                                                          | 2018 | Journal of the American Psychiatric Nurses Association | 24 | 3            | 247-259   | 10.1177/1078390317719321                                                              | #12698 | Exclusion reason: Wrong intervention (not an implementation intervention)            |
| Utilizing Geriatrics-Focused Web-Based Continuing Education to Reach Practitioners in Rural Practice                                                               | Ford, Channing R.; Sawyer, Patricia; Brown, Cynthia J.                                                                                       |      | TechTrends: Linking Research and Practice to           | 62 | 3            | 286-295   |                                                                                       | #5718  | Exclusion reason: Wrong study design (not a RCT or a nonrandomized controlled study) |

**Additional file 4. Excluded articles at full text assessment stage and reasons for exclusion.**

|                                                                                                                                                                          |                                                                                                |      |                                                 |    |   |         |                            |        |                                                                                      |
|--------------------------------------------------------------------------------------------------------------------------------------------------------------------------|------------------------------------------------------------------------------------------------|------|-------------------------------------------------|----|---|---------|----------------------------|--------|--------------------------------------------------------------------------------------|
|                                                                                                                                                                          |                                                                                                |      | Improve Learning                                |    |   |         |                            |        |                                                                                      |
| Utilizing peer academic detailing to improve childhood immunization coverage levels                                                                                      | Boom, J. A.; Nelson, C. S.; Kohrt, A. E.; Kozinetz, C. A.                                      | 2010 | Health Promot Pract                             | 11 | 3 | 377-86  | 10.1177/1524839908321487   | #7821  | Exclusion reason: Wrong population (not nurses)                                      |
| Video Modeling to Train Staff to Implement Discrete-Trial Instruction                                                                                                    | Catania, Cynthia N.; Almeida, Daniel; Liu-Constant, Brian; Reed, Florence D. DiGennaro         |      | Journal of Applied Behavior Analysis            | 42 | 2 | 387-392 |                            | #5809  | Exclusion reason: Wrong study design (not a RCT or a nonrandomized controlled study) |
| Video-Assisted Health Education Promotes Rehabilitation Training of Total Knee Arthroplasty Patients and Reduces Stress and Burnout in Nurses Compared to Oral Education | Li, Ping; Li, Xing; Meng, Hua; Huang, Ling; Zhang, Li; Wang, Shuang; Chen, Shaohua             | 2021 | BioMed Research International                   |    |   | 06-Jan  | 10.1155/2021/5058899       | #21158 | Exclusion reason: Wrong outcomes (not related to behaviour/clinical practice)        |
| Virtual Learning Environment in Continuing Education for Nursing in Oncology: an Experimental Study                                                                      | das Gracas Silva Matsubara, M.; De Domenico, E. B. L.                                          | 2016 | J Cancer Educ                                   | 31 | 4 | 804-810 | 10.1007/s13187-015-0889-x  | #14140 | Exclusion reason: Wrong outcomes (not related to behaviour/clinical practice)        |
| Web-based training for primary care providers on screening, brief intervention, and referral to treatment (SBIRT) for alcohol, tobacco, and other drugs                  | Stoner, S. A.; Mikko, A. T.; Carpenter, K. M.                                                  | 2014 | J Subst Abuse Treat                             | 47 | 5 | 362-70  | 10.1016/j.jsat.2014.06.009 | #15302 | Exclusion reason: Wrong population (not nurses)                                      |
| Working alliance in communication skills training for oncology clinicians: a controlled trial                                                                            | Meystre, C.; Bourquin, C.; Despland, J. N.; Stiefel, F.; de Roten, Y.                          | 2013 | Patient Educ Couns                              | 90 | 2 | 233-8   | 10.1016/j.pec.2012.10.013  | #16588 | Exclusion reason: Wrong population (not nurses)                                      |
| Workshop and package education intervention to knowledge, attitude and practice of ICU nurses on the use of physical restraints                                          | Khajeh, Mohammad; Bazghaleh, Milad; Tabarraie, Yaser; Mohammadpourhodki, Reza; Koushan, Mohsen | 2020 | Journal of Complementary & Integrative Medicine | 17 | 1 | 09-Jan  | 10.1515/jcim-2019-0065     | #18742 | Exclusion reason: Wrong outcomes (not related to behaviour/clinical practice)        |
