# Supplementary material for: Effects of implementation strategies on nursing practice and patient outcomes: a comprehensive systematic review and meta-analysis
Source: PubMed Central journal article supplement — Implement Sci. 2024 Sep 30;19:68. doi: 10.1186/s13012-024-01398-0 (PMC11443951; doi:10.1186/s13012-024-01398-0), 2024-09-30
Supplement: 13012_2024_1398_MOESM5_ESM.pdf [file 13012_2024_1398_MOESM5_ESM.pdf]

# Additional file 5. Detailed risk of bias assessment per outcome.

## OUTCOME: CLINICAL PRACTICE - ASSESSMENT/EXAMINATION

### Cluster randomized trials

| Study                    | Risk of bias domains |     |    |    |    |    | Overall |
|--------------------------|----------------------|-----|----|----|----|----|---------|
|                          | D1                   | D1b | D2 | D3 | D4 | D5 |         |
| Brady, 2020              | +                    | +   | +  | +  | +  | +  | +       |
| Charrier, 2008           | +                    | +   | +  | +  | +  | +  | +       |
| Cheater, 2006            | +                    | +   | +  | +  | +  | +  | +       |
| Curtis, 2011             | +                    | +   | +  | ✗  | +  | +  | ✗       |
| Davies, 2002             | +                    | +   | +  | +  | +  | +  | +       |
| Evans, 1997              | +                    | +   | +  | +  | +  | +  | +       |
| Forberg, 2016            | +                    | +   | +  | +  | +  | +  | +       |
| Francke, 1997            | +                    | +   | +  | +  | +  | +  | +       |
| Funk, 2017               | +                    | +   | +  | +  | +  | +  | +       |
| Hendryx, 1998            | +                    | +   | +  | +  | +  | +  | +       |
| Koh, 2009                | +                    | +   | +  | +  | +  | +  | +       |
| Kyriacos, 2019           | -                    | +   | +  | +  | +  | +  | -       |
| Lim, 2020                | ✗                    | +   | +  | +  | +  | +  | ✗       |
| Mäki-Turja-Rostedt, 2020 | +                    | +   | +  | ✗  | +  | +  | ✗       |
| Manias, 2011             | +                    | +   | +  | +  | +  | +  | +       |
| Marcantonio, 2010        | -                    | +   | +  | +  | +  | +  | -       |
| Mazzuca, 1987            | -                    | -   | +  | +  | +  | +  | -       |
| Middleton, 2011          | +                    | +   | +  | +  | +  | +  | +       |
| Muller-Staub, 2008       | +                    | +   | +  | +  | +  | +  | +       |
| Noome, 2017              | -                    | -   | +  | ✗  | +  | +  | ✗       |
| Pagaiya, 2005            | +                    | +   | +  | +  | +  | +  | +       |
| Smeland, 2022            | +                    | +   | +  | +  | +  | +  | +       |
| van de Steeg, 2014       | +                    | -   | +  | +  | +  | +  | -       |
| Yang, 2019               | +                    | +   | +  | +  | +  | +  | +       |
| Yung, 2022               | +                    | +   | +  | +  | +  | +  | +       |

Domains:  
D1 : Bias arising from the randomization process.  
D1b: Bias arising from the timing of identification and recruitment of individual participants in relation to timing of randomization.  
D2 : Bias due to deviations from intended intervention.  
D3 : Bias due to missing outcome data.  
D4 : Bias in measurement of the outcome.  
D5 : Bias in selection of the reported result.

Judgement  
✗ High  
- Some concerns  
+ Low

### Randomized controlled trials

| Study                    | Risk of bias domains |    |    |    |    | Overall |
|--------------------------|----------------------|----|----|----|----|---------|
|                          | D1                   | D2 | D3 | D4 | D5 |         |
| Elzeky, 2022             | +                    | -  | +  | +  | +  | -       |
| Ghazali, 2020            | +                    | +  | +  | -  | +  | -       |
| Jansson, 2014            | +                    | +  | +  | +  | +  | +       |
| Kim, 2022                | -                    | -  | +  | +  | +  | -       |
| Kroth, 2006              | +                    | +  | +  | +  | +  | +       |
| MacDonald, 2005          | +                    | +  | +  | +  | +  | +       |
| Murtaugh, 2005           | +                    | -  | +  | +  | -  | -       |
| Pauwels, 2018            | +                    | +  | +  | -  | +  | -       |
| Rankin, 2013             | +                    | +  | +  | +  | +  | +       |
| Rutherford-Hemming, 2016 | +                    | +  | +  | +  | +  | +       |
| Senarath, 2007           | +                    | +  | +  | -  | +  | -       |
| Snelgrove-Clarke, 2015   | +                    | +  | +  | +  | +  | +       |

Domains:  
D1: Bias arising from the randomization process.  
D2: Bias due to deviations from intended intervention.  
D3: Bias due to missing outcome data.  
D4: Bias in measurement of the outcome.  
D5: Bias in selection of the reported result.

Judgement  
- Some concerns  
+ Low

### Non-randomized controlled studies

| Study               | Risk of bias domains |    |    |    |    |    |    | Overall |
|---------------------|----------------------|----|----|----|----|----|----|---------|
|                     | D1                   | D2 | D3 | D4 | D5 | D6 | D7 |         |
| Ahmed, 2019         | -                    | +  | +  | +  | +  | +  | +  | -       |
| Alhalal, 2020       | ✗                    | +  | +  | +  | +  | -  | +  | ✗       |
| Boumans, 2005       | -                    | +  | +  | +  | -  | +  | +  | -       |
| Daly, 2009          | ✗                    | -  | +  | +  | +  | -  | +  | ✗       |
| deRond, 2000        | -                    | +  | +  | +  | +  | -  | +  | -       |
| Kinsman, 2021       | -                    | +  | +  | -  | -  | +  | +  | -       |
| Lacko, 1999         | ✗                    | +  | +  | +  | +  | -  | +  | ✗       |
| Magnan, 2008        | ✗                    | +  | ?  | +  | ?  | -  | +  | ✗       |
| Mancheril, 2021     | +                    | +  | -  | +  | -  | -  | -  | -       |
| Memon, 2022         | -                    | +  | -  | +  | -  | -  | +  | -       |
| Noordman, 2014      | -                    | +  | +  | +  | -  | -  | +  | -       |
| Rhew, 1999          | ✗                    | +  | +  | +  | ✗  | +  | +  | ✗       |
| Schondelmeyer, 2021 | -                    | +  | -  | +  | -  | -  | -  | -       |
| Seeley, 2008        | ✗                    | ?  | +  | +  | ?  | -  | +  | ✗       |
| Varghese, 2014      | ✗                    | +  | +  | +  | +  | -  | +  | ✗       |

Domains:  
D1: Bias due to confounding.  
D2: Bias due to selection of participants.  
D3: Bias in classification of interventions.  
D4: Bias due to deviations from intended interventions.  
D5: Bias due to missing data.  
D6: Bias in measurement of outcomes.  
D7: Bias in selection of the reported result.

Judgement  
✗ Critical  
✗ Serious  
- Moderate  
+ Low  
? No information

# Additional file 5. Detailed risk of bias assessment per outcome.

## OUTCOME: CLINICAL PRACTICE - COUNSELING/PROVISION OF ADVICE

### Cluster randomized trials

| Study                    | Risk of bias domains |     |    |    |    |    | Overall |
|--------------------------|----------------------|-----|----|----|----|----|---------|
|                          | D1                   | D1b | D2 | D3 | D4 | D5 |         |
| Antonini, 2021           | +                    | +   | +  | +  | ⊗  | +  | ⊗       |
| Cheater, 2006            | +                    | +   | +  | +  | +  | +  | +       |
| Davies, 2002             | +                    | +   | +  | +  | +  | +  | +       |
| Evans, 1997              | +                    | +   | +  | +  | +  | +  | +       |
| Francke, 1996            | +                    | +   | +  | +  | ⊗  | +  | ⊗       |
| Galfin, 2011             | +                    | -   | +  | +  | +  | +  | -       |
| Harrison, 2000           | +                    | +   | +  | +  | +  | +  | +       |
| Jansink, 2013            | +                    | +   | +  | ⊗  | +  | +  | ⊗       |
| Kaner, 2003              | +                    | +   | +  | ⊗  | -  | +  | ⊗       |
| Lim, 2020                | ⊗                    | +   | +  | +  | +  | +  | ⊗       |
| Magill, 2018             | +                    | +   | +  | +  | +  | +  | +       |
| Mäki-Turja-Rostedt, 2020 | +                    | +   | +  | ⊗  | +  | +  | ⊗       |
| Mazzuca, 1987            | -                    | -   | +  | +  | +  | +  | -       |
| Nakatani, 2012           | +                    | +   | +  | +  | +  | +  | +       |
| Noome, 2017              | -                    | -   | +  | ⊗  | +  | +  | ⊗       |
| Parker, 2013             | +                    | +   | +  | ⊗  | +  | +  | ⊗       |
| Sævareid, 2019           | +                    | +   | +  | +  | +  | +  | +       |
| van Lieshout, 2016       | +                    | +   | +  | +  | +  | +  | +       |
| Zohar, 2017              | +                    | -   | +  | +  | +  | +  | -       |

Domains:  
D1 : Bias arising from the randomization process.  
D1b: Bias arising from the timing of identification and recruitment of individual participants in relation to timing of randomization.  
D2 : Bias due to deviations from intended intervention.  
D3 : Bias due to missing outcome data.  
D4 : Bias in measurement of the outcome.  
D5 : Bias in selection of the reported result.

Judgement  
⊗ High  
- Some concerns  
+ Low

### Randomized controlled trials

| Study            | Risk of bias domains |    |    |    |    | Overall |
|------------------|----------------------|----|----|----|----|---------|
|                  | D1                   | D2 | D3 | D4 | D5 |         |
| Bernburg, 2019   | +                    | +  | +  | -  | +  | -       |
| DeBarbieri, 2020 | +                    | +  | +  | +  | +  | +       |
| Delvaux, 2004    | +                    | +  | +  | +  | +  | +       |
| deRuijter, 2018  | +                    | +  | +  | -  | +  | -       |
| Dudener, 2023    | +                    | -  | +  | -  | -  | ⊗       |
| Elahi, 2021      | +                    | -  | +  | -  | +  | -       |
| Karvinen, 2017   | +                    | +  | +  | -  | +  | -       |
| Kim, 2014        | +                    | +  | +  | -  | +  | -       |
| Khodadadi, 2013  | ⊗                    | ⊗  | +  | -  | -  | ⊗       |
| Maruyama, 2022   | +                    | ⊗  | +  | +  | -  | ⊗       |
| Morita, 2009     | +                    | +  | -  | -  | +  | -       |
| Morita, 2014     | +                    | +  | +  | -  | +  | -       |
| Ogden, 1997      | +                    | +  | +  | -  | +  | -       |
| Omidi, 2020      | +                    | ⊗  | +  | -  | +  | ⊗       |
| Sarna, 2012      | +                    | ⊗  | +  | ⊗  | +  | ⊗       |
| Tsai, 2011a      | +                    | -  | +  | +  | +  | -       |
| Tsai, 2011b      | -                    | +  | +  | +  | +  | -       |
| Wang, 2020       | +                    | +  | +  | ⊗  | +  | ⊗       |
| Wilkinson, 2008  | +                    | +  | +  | +  | +  | +       |

Domains:  
D1: Bias arising from the randomization process.  
D2: Bias due to deviations from intended intervention.  
D3: Bias due to missing outcome data.  
D4: Bias in measurement of the outcome.  
D5: Bias in selection of the reported result.

Judgement  
⊗ High  
- Some concerns  
+ Low

### Non-randomized controlled studies

| Study             | Risk of bias domains |    |    |    |    |    |    | Overall |
|-------------------|----------------------|----|----|----|----|----|----|---------|
|                   | D1                   | D2 | D3 | D4 | D5 | D6 | D7 |         |
| Ahmed, 2019       | -                    | +  | +  | +  | +  | +  | +  | -       |
| Bagherzadeh, 2021 | -                    | +  | -  | +  | +  | -  | +  | -       |
| Chenoweth, 2022   | -                    | +  | +  | -  | -  | -  | +  | -       |
| deRond, 2000      | -                    | +  | +  | +  | +  | -  | +  | -       |
| Filmer, 2020      | -                    | +  | +  | +  | ⊗  | -  | +  | ⊗       |
| Happ, 2014        | -                    | +  | +  | +  | +  | +  | +  | -       |
| Jo, 2015          | ⊗                    | +  | +  | +  | +  | -  | +  | ⊗       |
| Roelands, 2004    | ⊗                    | +  | +  | +  | -  | -  | +  | ⊗       |

Domains:  
D1: Bias due to confounding.  
D2: Bias due to selection of participants.  
D3: Bias in classification of interventions.  
D4: Bias due to deviations from intended interventions.  
D5: Bias due to missing data.  
D6: Bias in measurement of outcomes.  
D7: Bias in selection of the reported result.

Judgement  
⊗ Critical  
⊗ Serious  
- Moderate  
+ Low

# Additional file 5. Detailed risk of bias assessment per outcome.

## OUTCOME: CLINICAL PRACTICE - INFECTION CONTROL

### Cluster randomized trials

| Study              | Risk of bias domains |     |    |    |    |    | Overall |
|--------------------|----------------------|-----|----|----|----|----|---------|
|                    | D1                   | D1b | D2 | D3 | D4 | D5 |         |
| Behzadi, 2019      | +                    | +   | +  | ✗  | +  | +  | ✗       |
| Charrier, 2008     | +                    | +   | +  | +  | +  | +  | +       |
| Donati, 2020       | +                    | +   | +  | +  | +  | +  | +       |
| Forberg, 2016      | +                    | +   | +  | +  | +  | +  | +       |
| Friese, 2019       | +                    | +   | +  | -  | +  | +  | -       |
| Gomarverdi, 2019   | +                    | +   | +  | +  | +  | +  | +       |
| Hödl, 2019         | -                    | +   | +  | +  | +  | +  | -       |
| Hong, 1990         | +                    | +   | +  | +  | ✗  | +  | ✗       |
| Huis, 2013         | +                    | +   | +  | +  | +  | +  | +       |
| Passos, 2022       | +                    | +   | -  | +  | +  | +  | -       |
| Seto, 1991         | +                    | +   | +  | +  | +  | +  | +       |
| Teasing, 2020      | +                    | +   | +  | +  | +  | +  | +       |
| van Gaal, 2011a    | +                    | +   | -  | +  | +  | +  | -       |
| van Gaal, 2011b    | +                    | +   | -  | +  | +  | +  | -       |
| von Lengerke, 2017 | +                    | +   | +  | +  | +  | +  | +       |

Domains:  
D1 : Bias arising from the randomization process.  
D1b: Bias arising from the timing of identification and recruitment of Individual participants in relation to timing of randomization.  
D2 : Bias due to deviations from intended intervention.  
D3 : Bias due to missing outcome data.  
D4 : Bias in measurement of the outcome.  
D5 : Bias in selection of the reported result.

Judgement  
✗ High  
- Some concerns  
+ Low

### Randomized controlled trials

| Study          | Risk of bias domains |    |    |    |    | Overall |
|----------------|----------------------|----|----|----|----|---------|
|                | D1                   | D2 | D3 | D4 | D5 |         |
| Aloush, 2017   | +                    | +  | -  | +  | +  | -       |
| Bano, 2022     | ✗                    | -  | +  | -  | -  | ✗       |
| Carrico, 2007  | +                    | ✗  | +  | +  | +  | ✗       |
| Jansson, 2014  | +                    | +  | +  | +  | +  | +       |
| Jansson, 2016a | +                    | +  | -  | +  | +  | -       |
| Jansson, 2016b | +                    | +  | -  | +  | +  | -       |
| Jeihooni, 2018 | +                    | +  | +  | ✗  | +  | ✗       |
| Senarath, 2007 | +                    | +  | +  | -  | +  | -       |
| Wang, 2022     | +                    | -  | +  | +  | -  | -       |
| Wright, 1997   | +                    | +  | +  | -  | +  | -       |

Domains:  
D1: Bias arising from the randomization process.  
D2: Bias due to deviations from intended intervention.  
D3: Bias due to missing outcome data.  
D4: Bias in measurement of the outcome.  
D5: Bias in selection of the reported result.

Judgement  
✗ High  
- Some concerns  
+ Low

### Non-randomized controlled studies

| Study           | Risk of bias domains |    |    |    |    |    |    | Overall |
|-----------------|----------------------|----|----|----|----|----|----|---------|
|                 | D1                   | D2 | D3 | D4 | D5 | D6 | D7 |         |
| Ahmed, 2019     | -                    | +  | +  | +  | +  | +  | +  | -       |
| Akande, 2020    | ✗                    | +  | +  | +  | -  | -  | +  | ✗       |
| Bittner, 2002   | ✗                    | +  | +  | +  | +  | -  | +  | ✗       |
| Gould, 1997     | ✗                    | +  | +  | -  | ✗  | -  | +  | ✗       |
| Kim, 2007       | ✗                    | -  | +  | +  | +  | +  | +  | ✗       |
| O'Neil, 2016    | +                    | +  | +  | +  | +  | +  | +  | +       |
| Quintard, 2010  | ✗                    | +  | +  | -  | ✗  | -  | +  | ✗       |
| Sadeghi, 2018-1 | ✗                    | +  | +  | +  | -  | +  | +  | ✗       |
| Seto, 1989      | ✗                    | +  | +  | +  | +  | -  | +  | ✗       |

Domains:  
D1: Bias due to confounding.  
D2: Bias due to selection of participants.  
D3: Bias in classification of interventions.  
D4: Bias due to deviations from intended interventions.  
D5: Bias due to missing data.  
D6: Bias in measurement of outcomes.  
D7: Bias in selection of the reported result.

Judgement  
✗ Critical  
✗ Serious  
- Moderate  
+ Low

# Additional file 5. Detailed risk of bias assessment per outcome.

## OUTCOME: CLINICAL PRACTICE - CARE COORDINATION

### Cluster randomized trials

| Study             | Risk of bias domains |     |    |    |    |    | Overall |
|-------------------|----------------------|-----|----|----|----|----|---------|
|                   | D1                   | D1b | D2 | D3 | D4 | D5 |         |
| Brady, 2020       | +                    | +   | +  | +  | +  | +  | +       |
| Carroll, 2012     | +                    | +   | +  | +  | +  | +  | +       |
| Cheater, 2006     | +                    | +   | +  | +  | +  | +  | +       |
| Curtis, 2011      | +                    | +   | +  | X  | +  | +  | X       |
| Evans, 1997       | +                    | +   | +  | +  | +  | +  | +       |
| Fairall, 2005     | +                    | +   | +  | +  | +  | +  | +       |
| Harrison, 2000    | +                    | +   | +  | +  | +  | +  | +       |
| Jones, 1998       | +                    | +   | +  | +  | +  | +  | +       |
| Liu, 2010         | +                    | +   | +  | +  | +  | +  | +       |
| Marcantonio, 2010 | -                    | +   | +  | +  | +  | +  | -       |
| Mazzuca, 1987     | -                    | -   | +  | +  | +  | +  | -       |
| Nemati, 2022      | +                    | +   | -  | +  | +  | +  | -       |
| Noome, 2017       | -                    | -   | +  | X  | +  | +  | X       |
| Van Gaal, 2011a   | +                    | +   | -  | +  | +  | +  | -       |
| Van Gaal, 2011b   | +                    | +   | -  | +  | +  | +  | -       |
| Westbrook, 2017   | +                    | +   | +  | +  | +  | +  | +       |

Domains:  
D1 : Bias arising from the randomization process.  
D1b: Bias arising from the timing of identification and recruitment of individual participants in relation to timing of randomization.  
D2 : Bias due to deviations from intended intervention.  
D3 : Bias due to missing outcome data.  
D4 : Bias in measurement of the outcome.  
D5 : Bias in selection of the reported result.

Judgement  
 High  
 Some concerns  
 Low

### Randomized controlled trials

| Study          | Risk of bias domains |    |    |    |    | Overall |
|----------------|----------------------|----|----|----|----|---------|
|                | D1                   | D2 | D3 | D4 | D5 |         |
| Bruce, 2007    | +                    | +  | +  | +  | +  | +       |
| Feldman, 2004  | -                    | -  | -  | -  | X  | X       |
| Ogden, 1997    | +                    | +  | +  | -  | +  | -       |
| Omidi, 2020    | +                    | X  | +  | -  | +  | X       |
| Sarna, 2012    | +                    | X  | +  | X  | +  | X       |
| Senarath, 2007 | +                    | +  | +  | -  | +  | -       |
| Tsai, 2011b    | -                    | +  | +  | +  | +  | -       |

Domains:  
D1: Bias arising from the randomization process.  
D2: Bias due to deviations from intended intervention.  
D3: Bias due to missing outcome data.  
D4: Bias in measurement of the outcome.  
D5: Bias in selection of the reported result.

Judgement  
 High  
 Some concerns  
 Low

### Non-randomized controlled studies

| Study         | Risk of bias domains |    |    |    |    |    |    | Overall |
|---------------|----------------------|----|----|----|----|----|----|---------|
|               | D1                   | D2 | D3 | D4 | D5 | D6 | D7 |         |
| Akrami, 2019  | ●                    | -  | +  | +  | +  | -  | +  | ●       |
| Boumans, 2015 | -                    | +  | +  | +  | -  | +  | +  | -       |
| Park, 2021    | -                    | -  | -  | +  | -  | -  | -  | -       |
| Sayre, 2012   | ●                    | +  | +  | +  | +  | -  | +  | ●       |
| Seo, 2020     | X                    | +  | +  | +  | +  | -  | +  | X       |

Domains:  
D1: Bias due to confounding.  
D2: Bias due to selection of participants.  
D3: Bias in classification of interventions.  
D4: Bias due to deviations from intended interventions.  
D5: Bias due to missing data.  
D6: Bias in measurement of outcomes.  
D7: Bias in selection of the reported result.

Judgement  
 Critical  
 Serious  
 Moderate  
 Low

# Additional file 5. Detailed risk of bias assessment per outcome.

## OUTCOME: CLINICAL PRACTICE – DOCUMENTATION

### Cluster randomized trials

| Study                    | Risk of bias domains |     |    |    |    |    | Overall |
|--------------------------|----------------------|-----|----|----|----|----|---------|
|                          | D1                   | D1b | D2 | D3 | D4 | D5 |         |
| Bucknall, 2022           | +                    | +   | +  | +  | +  | +  | +       |
| Carroll, 2012            | +                    | +   | +  | +  | +  | +  | +       |
| Charrier, 2008           | +                    | +   | +  | +  | +  | +  | +       |
| Cheater, 2006            | +                    | +   | +  | +  | +  | +  | +       |
| Collins, 2021            | +                    | +   | -  | +  | +  | +  | -       |
| Cortez, 2016             | +                    | +   | +  | +  | +  | +  | +       |
| Esche, 2015              | +                    | +   | +  | -  | +  | +  | -       |
| Fakih, 2012              | -                    | -   | +  | +  | +  | +  | -       |
| Happ, 2015               | +                    | +   | +  | +  | +  | +  | +       |
| Johnston, 2007           | +                    | +   | +  | -  | +  | +  | -       |
| Kyriacos, 2015           | +                    | +   | +  | +  | +  | +  | +       |
| Lundgreen, 1999          | -                    | -   | +  | +  | +  | +  | -       |
| Mäki-Turja-Rostedt, 2020 | +                    | +   | +  | X  | +  | +  | X       |
| Muller-Staub, 2008       | +                    | +   | +  | +  | +  | +  | +       |
| Noome, 2017              | -                    | -   | +  | X  | +  | +  | X       |
| Reynolds, 2021           | +                    | +   | +  | +  | +  | +  | +       |
| Sævareid, 2019           | +                    | +   | +  | +  | +  | +  | +       |
| Tornvall, 2009           | +                    | +   | +  | X  | +  | +  | X       |
| Wagner, 2005             | -                    | -   | +  | +  | +  | +  | -       |

Domains:  
D1 : Bias arising from the randomization process.  
D1b: Bias arising from the timing of identification and recruitment of individual participants in relation to timing of randomization.  
D2 : Bias due to deviations from intended intervention.  
D3 : Bias due to missing outcome data.  
D4 : Bias in measurement of the outcome.  
D5 : Bias in selection of the reported result.

Judgement  
● High  
● Some concerns  
● Low

### Randomized controlled trials

| Study           | Risk of bias domains |    |    |    |    | Overall |
|-----------------|----------------------|----|----|----|----|---------|
|                 | D1                   | D2 | D3 | D4 | D5 |         |
| deRuijter, 2018 | +                    | +  | +  | +  | +  | +       |
| Grommi, 2021    | +                    | -  | +  | +  | -  | -       |
| MacDonald, 2005 | +                    | +  | +  | +  | +  | +       |

Domains:  
D1: Bias arising from the randomization process.  
D2: Bias due to deviations from intended intervention.  
D3: Bias due to missing outcome data.  
D4: Bias in measurement of the outcome.  
D5: Bias in selection of the reported result.

Judgement  
● Some concerns  
● Low

### Non-randomized controlled studies

| Study          | Risk of bias domains |    |    |    |    |    |    | Overall |
|----------------|----------------------|----|----|----|----|----|----|---------|
|                | D1                   | D2 | D3 | D4 | D5 | D6 | D7 |         |
| Boumans, 2005  | -                    | +  | +  | +  | -  | +  | +  | -       |
| Cone, 1996     | ●                    | +  | +  | +  | +  | +  | +  | ●       |
| deRond, 2000   | -                    | +  | +  | +  | +  | -  | +  | -       |
| Kinsman, 2021  | -                    | +  | +  | -  | -  | +  | +  | -       |
| Oniki, 2003    | ●                    | ?  | +  | +  | ?  | +  | +  | ●       |
| Varghese, 2014 | ●                    | +  | +  | +  | +  | -  | +  | ●       |

Domains:  
D1: Bias due to confounding.  
D2: Bias due to selection of participants.  
D3: Bias in classification of interventions.  
D4: Bias due to deviations from intended interventions.  
D5: Bias due to missing data.  
D6: Bias in measurement of outcomes.  
D7: Bias in selection of the reported result.

Judgement  
● Critical  
● Moderate  
● Low  
● No information

## Additional file 5. Detailed risk of bias assessment per outcome.

### OUTCOME: CLINICAL PRACTICE - MEDICATION ADMINISTRATION

**Cluster randomized trials**

| Study            | Risk of bias domains |     |    |    |    |    | Overall |
|------------------|----------------------|-----|----|----|----|----|---------|
|                  | D1                   | D1b | D2 | D3 | D4 | D5 |         |
| Charrier, 2008   | +                    | +   | +  | +  | +  | +  | +       |
| Hasnain, 2019    | +                    | +   | +  | +  | +  | +  | +       |
| Hasselblad, 2022 | +                    | -   | +  | +  | +  | +  | -       |
| Hendryx, 1998    | +                    | +   | +  | +  | +  | +  | +       |
| Hutchinson, 2020 | +                    | +   | +  | +  | +  | +  | +       |
| Johnson, 2019    | +                    | +   | +  | +  | +  | +  | +       |
| Johnston, 2007   | +                    | +   | +  | -  | +  | +  | -       |
| Lau, 2017        | +                    | +   | +  | +  | +  | +  | +       |
| Pitkää, 2014     | +                    | +   | -  | +  | +  | +  | -       |
| Rant, 2001       | +                    | +   | +  | X  | +  | +  | X       |
| Titler, 2009     | +                    | +   | +  | +  | +  | +  | +       |
| Walsh, 2016      | +                    | +   | +  | +  | +  | +  | +       |

Domains:  
D1 : Bias arising from the randomization process.  
D1b: Bias arising from the timing of identification and recruitment of individual participants in relation to timing of randomization.  
D2 : Bias due to deviations from intended intervention.  
D3 : Bias due to missing outcome data.  
D4 : Bias in measurement of the outcome.  
D5 : Bias in selection of the reported result.

Judgement  
 High  
 Some concerns  
 Low

**Randomized controlled trials**

| Study            | Risk of bias domains |    |    |    |    | Overall |
|------------------|----------------------|----|----|----|----|---------|
|                  | D1                   | D2 | D3 | D4 | D5 |         |
| Schneider, 2006  | +                    | +  | +  | +  | +  | +       |
| Srikrajang, 2005 | +                    | X  | +  | X  | +  | X       |
| Vicdan, 2019     | +                    | +  | +  | +  | +  | +       |
| Zhu, 2022        | -                    | -  | +  | +  | +  | -       |

Domains:  
D1: Bias arising from the randomization process.  
D2: Bias due to deviations from intended intervention.  
D3: Bias due to missing outcome data.  
D4: Bias in measurement of the outcome.  
D5: Bias in selection of the reported result.

Judgement  
 High  
 Some concerns  
 Low

**Non-randomized controlled studies**

| Study            | Risk of bias domains |    |    |    |    |    |    | Overall |
|------------------|----------------------|----|----|----|----|----|----|---------|
|                  | D1                   | D2 | D3 | D4 | D5 | D6 | D7 |         |
| Daly, 2009       | ●                    | -  | +  | +  | +  | -  | +  | ●       |
| deRond, 2000     | -                    | +  | +  | +  | -  | -  | +  | -       |
| Edwards, 2007    | ●                    | +  | +  | +  | +  | +  | +  | ●       |
| Rothschild, 2005 | ●                    | +  | +  | +  | +  | +  | +  | ●       |
| Sung, 2008       | X                    | +  | +  | +  | +  | -  | +  | X       |
| Ziyaeifard, 2018 | ●                    | +  | ?  | +  | +  | -  | +  | ●       |

Domains:  
D1: Bias due to confounding.  
D2: Bias due to selection of participants.  
D3: Bias in classification of interventions.  
D4: Bias due to deviations from intended interventions.  
D5: Bias due to missing data.  
D6: Bias in measurement of outcomes.  
D7: Bias in selection of the reported result.

Judgement  
 Critical  
 Serious  
 Moderate  
 Low  
 No information

### OUTCOME: CLINICAL PRACTICE - SYMPTOM MANAGEMENT

**Cluster randomized trials**

| Study             | Risk of bias domains |     |    |    |    |    | Overall |
|-------------------|----------------------|-----|----|----|----|----|---------|
|                   | D1                   | D1b | D2 | D3 | D4 | D5 |         |
| Chan, 2013        | +                    | +   | +  | X  | X  | +  | X       |
| Chen, 2016        | +                    | +   | +  | X  | +  | +  | X       |
| Francke, 1996     | +                    | +   | +  | X  | +  | +  | X       |
| Johnston, 2007    | +                    | +   | +  | -  | +  | +  | -       |
| Kalinowski, 2015  | +                    | +   | +  | +  | +  | +  | +       |
| Manias, 2011      | +                    | +   | +  | +  | +  | +  | +       |
| Marcantonio, 2010 | -                    | +   | +  | +  | +  | +  | -       |

Domains:  
D1 : Bias arising from the randomization process.  
D1b: Bias arising from the timing of identification and recruitment of individual participants in relation to timing of randomization.  
D2 : Bias due to deviations from intended intervention.  
D3 : Bias due to missing outcome data.  
D4 : Bias in measurement of the outcome.  
D5 : Bias in selection of the reported result.

Judgement  
 High  
 Some concerns  
 Low

**Randomized controlled trials**

| Study        | Risk of bias domains |    |    |    |    | Overall |
|--------------|----------------------|----|----|----|----|---------|
|              | D1                   | D2 | D3 | D4 | D5 |         |
| Arzani, 2020 | +                    | +  | +  | -  | X  | X       |
| Gao, 2022    | -                    | -  | +  | -  | -  | X       |
| Omidi, 2020  | +                    | X  | +  | -  | +  | X       |

Domains:  
D1: Bias arising from the randomization process.  
D2: Bias due to deviations from intended intervention.  
D3: Bias due to missing outcome data.  
D4: Bias in measurement of the outcome.  
D5: Bias in selection of the reported result.

Judgement  
 High  
 Some concerns  
 Low

**Non-randomized controlled studies**

| Study          | Risk of bias domains |    |    |    |    |    |    | Overall |
|----------------|----------------------|----|----|----|----|----|----|---------|
|                | D1                   | D2 | D3 | D4 | D5 | D6 | D7 |         |
| Hessig, 2004   | ●                    | +  | +  | +  | -  | -  | +  | ●       |
| Jo, 2015       | ●                    | +  | +  | +  | +  | -  | +  | ●       |
| Lin, 2008      | ●                    | +  | +  | +  | +  | -  | +  | ●       |
| Michaels, 2007 | ●                    | +  | +  | +  | ?  | -  | +  | ●       |

Domains:  
D1: Bias due to confounding.  
D2: Bias due to selection of participants.  
D3: Bias in classification of interventions.  
D4: Bias due to deviations from intended interventions.  
D5: Bias due to missing data.  
D6: Bias in measurement of outcomes.  
D7: Bias in selection of the reported result.

Judgement  
 Critical  
 Moderate  
 Low  
 No information

## Additional file 5. Detailed risk of bias assessment per outcome.

### OUTCOME: CLINICAL PRACTICE - TESTING/SCREENING

**Cluster randomized trials**

| Study              | Risk of bias domains |     |    |    |    |    | Overall |
|--------------------|----------------------|-----|----|----|----|----|---------|
|                    | D1                   | D1b | D2 | D3 | D4 | D5 |         |
| Brennan, 2022      | +                    | +   | +  | +  | +  | +  | +       |
| Chambers, 2022     | +                    | -   | +  | +  | +  | +  | -       |
| Collins, 2021      | +                    | +   | -  | +  | +  | +  | -       |
| Fairall, 2005      | +                    | +   | +  | +  | +  | +  | +       |
| Gengiah, 2021      | +                    | +   | +  | +  | +  | +  | +       |
| Hendryx, 1998      | +                    | +   | +  | +  | +  | +  | +       |
| Pagaiya, 2005      | +                    | +   | +  | +  | +  | +  | +       |
| Weaver, 2016       | +                    | -   | +  | +  | +  | +  | -       |
| Wood, 2021         | -                    | +   | -  | -  | +  | +  | X       |
| Zarifsanaiey, 2022 | +                    | +   | -  | +  | +  | +  | -       |

Domains:  
D1 : Bias arising from the randomization process.  
D1b: Bias arising from the timing of identification and recruitment of individual participants in relation to timing of randomization.  
D2 : Bias due to deviations from intended intervention.  
D3 : Bias due to missing outcome data.  
D4 : Bias in measurement of the outcome.  
D5 : Bias in selection of the reported result.

Judgement  
 High  
 Some concerns  
 Low

**Randomized controlled trials**

| Study            | Risk of bias domains |    |    |    |    | Overall |
|------------------|----------------------|----|----|----|----|---------|
|                  | D1                   | D2 | D3 | D4 | D5 |         |
| O'Neill, 1999    | +                    | +  | +  | +  | +  | +       |
| Segal, 2015      | +                    | -  | +  | +  | +  | -       |
| Srikrajang, 2005 | +                    | X  | +  | X  | +  | X       |

Domains:  
D1: Bias arising from the randomization process.  
D2: Bias due to deviations from intended intervention.  
D3: Bias due to missing outcome data.  
D4: Bias in measurement of the outcome.  
D5: Bias in selection of the reported result.

Judgement  
 High  
 Some concerns  
 Low

**Non-randomized controlled studies**

| Study       | Risk of bias domains |    |    |    |    |    |    | Overall |
|-------------|----------------------|----|----|----|----|----|----|---------|
|             | D1                   | D2 | D3 | D4 | D5 | D6 | D7 |         |
| Fabre, 2020 | X                    | +  | +  | +  | +  | +  | +  | X       |
| Locke, 2011 | X                    | +  | +  | +  | -  | +  | +  | X       |

Domains:  
D1: Bias due to confounding.  
D2: Bias due to selection of participants.  
D3: Bias in classification of interventions.  
D4: Bias due to deviations from intended interventions.  
D5: Bias due to missing data.  
D6: Bias in measurement of outcomes.  
D7: Bias in selection of the reported result.

Judgement  
 Critical  
 Serious  
 Moderate  
 Low

### OUTCOME: CLINICAL PRACTICE - PHYSICAL RESTRAINT

**Cluster randomized trials**

| Study          | Risk of bias domains |     |    |    |    |    | Overall |
|----------------|----------------------|-----|----|----|----|----|---------|
|                | D1                   | D1b | D2 | D3 | D4 | D5 |         |
| Abraham, 2019  | +                    | +   | +  | +  | +  | +  | +       |
| Chang, 2016    | +                    | +   | +  | +  | +  | +  | +       |
| Happ, 2015     | +                    | +   | +  | +  | +  | +  | +       |
| Huang, 2009    | +                    | +   | +  | X  | X  | +  | X       |
| Huizing, 2006  | +                    | +   | -  | +  | +  | +  | -       |
| Huizing, 2009  | +                    | +   | -  | +  | +  | +  | -       |
| Köpke, 2012    | +                    | +   | +  | +  | +  | +  | +       |
| Rantz, 2001    | +                    | +   | +  | X  | +  | +  | X       |
| Välimäki, 2022 | +                    | +   | +  | +  | +  | +  | +       |

Domains:  
D1 : Bias arising from the randomization process.  
D1b: Bias arising from the timing of identification and recruitment of individual participants in relation to timing of randomization.  
D2 : Bias due to deviations from intended intervention.  
D3 : Bias due to missing outcome data.  
D4 : Bias in measurement of the outcome.  
D5 : Bias in selection of the reported result.

Judgement  
 High  
 Some concerns  
 Low

**Randomized controlled trials**

| Study       | Risk of bias domains |    |    |    |    | Overall |
|-------------|----------------------|----|----|----|----|---------|
|             | D1                   | D2 | D3 | D4 | D5 |         |
| Kavak, 2019 | +                    | +  | -  | +  | +  | -       |

Domains:  
D1: Bias arising from the randomization process.  
D2: Bias due to deviations from intended intervention.  
D3: Bias due to missing outcome data.  
D4: Bias in measurement of the outcome.  
D5: Bias in selection of the reported result.

Judgement  
 Some concerns  
 Low

### Non-randomized controlled studies

N/A

## Additional file 5. Detailed risk of bias assessment per outcome.

### OUTCOME: CLINICAL PRACTICE - EQUIPMENT MANAGEMENT

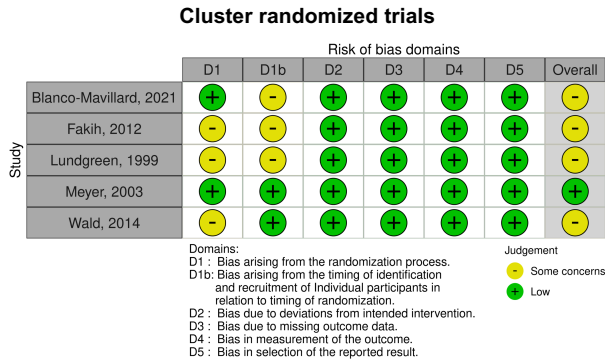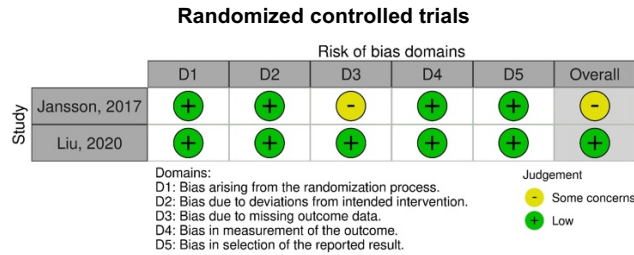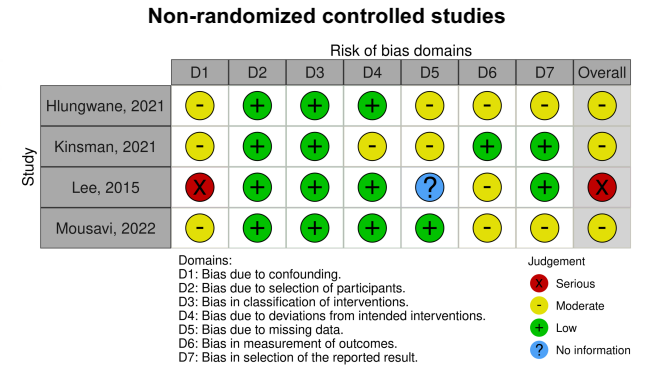

### OUTCOME: CLINICAL PRACTICE – PRESCRIPTION

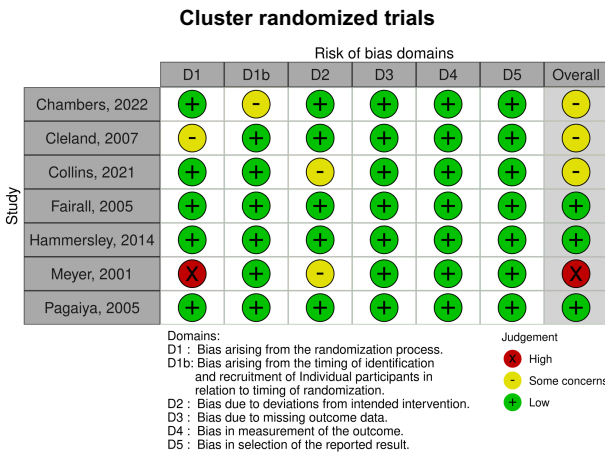

**Randomized controlled trials**  
N/A

**Non-randomized controlled studies**  
N/A



## Additional file 5. Detailed risk of bias assessment per outcome.

### OUTCOME: CLINICAL PRACTICE – IMMUNIZATION

#### Cluster randomized trials

| Study       | Risk of bias domains |     |    |    |    |    | Overall |
|-------------|----------------------|-----|----|----|----|----|---------|
|             | D1                   | D1b | D2 | D3 | D4 | D5 |         |
| Berry, 2022 | +                    | +   | +  | +  | +  | +  | +       |

Domains:  
D1 : Bias arising from the randomization process.  
D1b: Bias arising from the timing of identification and recruitment of Individual participants in relation to timing of randomization.  
D2 : Bias due to deviations from intended intervention.  
D3 : Bias due to missing outcome data.  
D4 : Bias in measurement of the outcome.  
D5 : Bias in selection of the reported result.

Judgement  
+ Low

#### Randomized controlled trials

| Study         | Risk of bias domains |    |    |    |    | Overall |
|---------------|----------------------|----|----|----|----|---------|
|               | D1                   | D2 | D3 | D4 | D5 |         |
| Shevlin, 2002 | +                    | +  | +  | +  | +  | +       |

Domains:  
D1: Bias arising from the randomization process.  
D2: Bias due to deviations from intended intervention.  
D3: Bias due to missing outcome data.  
D4: Bias in measurement of the outcome.  
D5: Bias in selection of the reported result.

Judgement  
+ Low

#### Non-randomized controlled studies

| Study        | Risk of bias domains |    |    |    |    |    |    | Overall |
|--------------|----------------------|----|----|----|----|----|----|---------|
|              | D1                   | D2 | D3 | D4 | D5 | D6 | D7 |         |
| Nowalk, 2005 | ●                    | +  | +  | +  | ?  | +  | +  | ●       |
| Rhew, 1999   | ●                    | +  | +  | +  | ●  | +  | +  | ●       |

Domains:  
D1: Bias due to confounding.  
D2: Bias due to selection of participants.  
D3: Bias in classification of interventions.  
D4: Bias due to deviations from intended interventions.  
D5: Bias due to missing data.  
D6: Bias in measurement of outcomes.  
D7: Bias in selection of the reported result.

Judgement  
● Critical  
+ Low  
? No information

### OUTCOME: CLINICAL PRACTICE - INCIDENT REPORTING

#### Cluster randomized trials

| Study        | Risk of bias domains |     |    |    |    |    | Overall |
|--------------|----------------------|-----|----|----|----|----|---------|
|              | D1                   | D1b | D2 | D3 | D4 | D5 |         |
| Teresi, 2013 | +                    | +   | +  | +  | +  | +  | +       |

Domains:  
D1 : Bias arising from the randomization process.  
D1b: Bias arising from the timing of identification and recruitment of Individual participants in relation to timing of randomization.  
D2 : Bias due to deviations from intended intervention.  
D3 : Bias due to missing outcome data.  
D4 : Bias in measurement of the outcome.  
D5 : Bias in selection of the reported result.

Judgement  
+ Low

#### Randomized controlled trials

N/A

#### Non-randomized controlled studies

| Study       | Risk of bias domains |    |    |    |    |    |    | Overall |
|-------------|----------------------|----|----|----|----|----|----|---------|
|             | D1                   | D2 | D3 | D4 | D5 | D6 | D7 |         |
| Evans, 2007 | -                    | +  | +  | +  | +  | +  | +  | -       |

Domains:  
D1: Bias due to confounding.  
D2: Bias due to selection of participants.  
D3: Bias in classification of interventions.  
D4: Bias due to deviations from intended interventions.  
D5: Bias due to missing data.  
D6: Bias in measurement of outcomes.  
D7: Bias in selection of the reported result.

Judgement  
- Moderate  
+ Low

### OUTCOME: CLINICAL PRACTICE - OTHER

#### Cluster randomized trials

| Study           | Risk of bias domains |     |    |    |    |    | Overall |
|-----------------|----------------------|-----|----|----|----|----|---------|
|                 | D1                   | D1b | D2 | D3 | D4 | D5 |         |
| Emamgholi, 2020 | ●                    | +   | +  | -  | +  | +  | ●       |

Domains:  
D1 : Bias arising from the randomization process.  
D1b: Bias arising from the timing of identification and recruitment of Individual participants in relation to timing of randomization.  
D2 : Bias due to deviations from intended intervention.  
D3 : Bias due to missing outcome data.  
D4 : Bias in measurement of the outcome.  
D5 : Bias in selection of the reported result.

Judgement  
● High  
- Some concerns  
+ Low

#### Randomized controlled trials

N/A

#### Non-randomized controlled studies

N/A

# Additional file 5. Detailed risk of bias assessment per outcome.

## OUTCOME: PATIENT HEALTH & WELL-BEING

### Cluster randomized trials

| Study                  | Risk of bias domains |     |    |    |    |    | Overall |
|------------------------|----------------------|-----|----|----|----|----|---------|
|                        | D1                   | D1b | D2 | D3 | D4 | D5 |         |
| Abraham, 2019          | +                    | +   | +  | +  | +  | +  | +       |
| Blanco-Mavillard, 2021 | +                    | -   | +  | +  | +  | +  | -       |
| Brennan, 2022          | +                    | +   | +  | +  | +  | +  | +       |
| Bucknall, 2022         | +                    | +   | +  | +  | +  | +  | +       |
| Chambers, 2022         | +                    | -   | +  | +  | +  | +  | -       |
| Cheater, 2006          | +                    | +   | +  | +  | +  | +  | +       |
| Chen, 2016             | +                    | +   | +  | ×  | +  | +  | ×       |
| Cleland, 2007          | -                    | +   | +  | +  | +  | +  | -       |
| Collins, 2021          | +                    | +   | -  | +  | +  | +  | -       |
| Cortez, 2016           | +                    | +   | +  | +  | +  | +  | +       |
| Curtis, 2011           | +                    | +   | +  | ×  | +  | +  | ×       |
| Forberg, 2016          | +                    | +   | +  | +  | +  | +  | +       |
| Funk, 2017             | +                    | +   | +  | +  | +  | +  | +       |
| Gallin, 2011           | +                    | -   | +  | +  | +  | +  | -       |
| Hammersley, 2014       | +                    | +   | +  | +  | +  | +  | +       |
| Happ, 2015             | +                    | +   | +  | +  | +  | +  | +       |
| Hasselblad, 2022       | +                    | -   | +  | -  | +  | +  | -       |
| Hendryx, 1998          | +                    | +   | +  | +  | +  | +  | +       |
| Hödl, 2019             | +                    | -   | +  | +  | +  | +  | -       |
| Koh, 2009              | +                    | +   | +  | +  | +  | +  | +       |
| Köpke, 2012            | +                    | +   | +  | +  | +  | +  | +       |
| Kyriacos, 2019         | -                    | +   | +  | +  | +  | +  | -       |
| Lundgree, 1999         | -                    | -   | +  | +  | +  | +  | -       |
| Manias, 2011           | +                    | +   | +  | +  | +  | +  | +       |
| Marcantonio, 2010      | -                    | +   | +  | +  | +  | +  | -       |
| Meyer, 2003            | +                    | +   | +  | -  | +  | +  | -       |
| Middleton, 2011        | +                    | +   | +  | +  | +  | +  | +       |
| Pitkää, 2014           | +                    | +   | -  | +  | +  | +  | -       |
| Rantz, 2001            | +                    | +   | +  | ×  | +  | +  | ×       |
| Reynolds, 2021         | +                    | +   | +  | +  | +  | +  | +       |
| Välimäki, 2022         | +                    | +   | +  | +  | +  | +  | +       |
| van Lieshout, 2016     | +                    | +   | +  | +  | +  | +  | +       |
| van de Steeg, 2014     | +                    | -   | +  | +  | +  | +  | -       |
| Wagner, 2005           | -                    | -   | +  | +  | +  | +  | -       |
| Wald, 2014             | -                    | +   | +  | +  | +  | +  | -       |
| Walsh, 2016            | +                    | +   | +  | +  | +  | +  | +       |

Domains:  
D1 : Bias arising from the randomization process.  
D1b: Bias arising from the timing of identification and recruitment of individual participants in relation to timing of randomization.  
D2 : Bias due to deviations from intended intervention.  
D3 : Bias due to missing outcome data.  
D4 : Bias in measurement of the outcome.  
D5 : Bias in selection of the reported result.

Judgement  
● High  
● Some concerns  
● Low

### Randomized controlled trials

| Study            | Risk of bias domains |    |    |    |    | Overall |
|------------------|----------------------|----|----|----|----|---------|
|                  | D1                   | D2 | D3 | D4 | D5 |         |
| DeBarbieri, 2020 | +                    | +  | +  | +  | +  | +       |
| Gao, 2022        | -                    | -  | +  | -  | -  | ×       |
| Senarath, 2007   | +                    | +  | +  | +  | +  | +       |
| Wilkinson, 2008  | +                    | +  | +  | +  | +  | +       |

Domains:  
D1: Bias arising from the randomization process.  
D2: Bias due to deviations from intended intervention.  
D3: Bias due to missing outcome data.  
D4: Bias in measurement of the outcome.  
D5: Bias in selection of the reported result.

Judgement  
● High  
● Some concerns  
● Low

### Non-randomized controlled studies

| Study            | Risk of bias domains |    |    |    |    |    |    | Overall |
|------------------|----------------------|----|----|----|----|----|----|---------|
|                  | D1                   | D2 | D3 | D4 | D5 | D6 | D7 |         |
| Boumans, 2005    | -                    | +  | +  | +  | -  | +  | +  | -       |
| Chenoweth, 2022  | -                    | +  | +  | -  | -  | -  | +  | -       |
| Lee, 2015        | ×                    | +  | +  | +  | ?  | +  | +  | ×       |
| Mancheril, 2021  | +                    | +  | -  | +  | -  | -  | -  | -       |
| O'Neil, 2016     | +                    | +  | +  | +  | +  | +  | +  | +       |
| Park, 2021       | -                    | -  | -  | +  | -  | -  | -  | -       |
| Ziyaeifard, 2018 | ●                    | +  | ?  | +  | +  | -  | +  | ●       |

Domains:  
D1: Bias due to confounding.  
D2: Bias due to selection of participants.  
D3: Bias in classification of interventions.  
D4: Bias due to deviations from intended interventions.  
D5: Bias due to missing data.  
D6: Bias in measurement of outcomes.  
D7: Bias in selection of the reported result.

Judgement  
● Critical  
● Serious  
● Moderate  
● Low  
● No information

# Additional file 5. Detailed risk of bias assessment per outcome.

## OUTCOME: INTENTION

### Cluster randomized trials

| Study      | Risk of bias domains |     |    |    |    |    | Overall |
|------------|----------------------|-----|----|----|----|----|---------|
|            | D1                   | D1b | D2 | D3 | D4 | D5 |         |
| Chan, 2013 | +                    | +   | +  | -  | -  | +  | -       |

Domains:  
 D1 : Bias arising from the randomization process.  
 D1b: Bias arising from the timing of identification and recruitment of individual participants in relation to timing of randomization.  
 D2 : Bias due to deviations from intended intervention.  
 D3 : Bias due to missing outcome data.  
 D4 : Bias in measurement of the outcome.  
 D5 : Bias in selection of the reported result.

Judgement  
 - High  
 + Low

### Randomized controlled trials

| Study           | Risk of bias domains |    |    |    |    | Overall |
|-----------------|----------------------|----|----|----|----|---------|
|                 | D1                   | D2 | D3 | D4 | D5 |         |
| deRuijter, 2018 | +                    | +  | +  | -  | +  | -       |
| Morita, 2014    | +                    | +  | +  | -  | +  | -       |

Domains:  
 D1: Bias arising from the randomization process.  
 D2: Bias due to deviations from intended intervention.  
 D3: Bias due to missing outcome data.  
 D4: Bias in measurement of the outcome.  
 D5: Bias in selection of the reported result.

Judgement  
 - Some concerns  
 + Low

### Non-randomized controlled studies

| Study         | Risk of bias domains |    |    |    |    |    |    | Overall |
|---------------|----------------------|----|----|----|----|----|----|---------|
|               | D1                   | D2 | D3 | D4 | D5 | D6 | D7 |         |
| Edwards, 2007 | -                    | +  | +  | +  | +  | -  | +  | -       |

Domains:  
 D1: Bias due to confounding.  
 D2: Bias due to selection of participants.  
 D3: Bias in classification of interventions.  
 D4: Bias due to deviations from intended interventions.  
 D5: Bias due to missing data.  
 D6: Bias in measurement of outcomes.  
 D7: Bias in selection of the reported result.

Judgement  
 - Critical  
 - Moderate  
 + Low

## OUTCOME: ATTITUDE

### Cluster randomized trials

| Study              | Risk of bias domains |     |    |    |    |    | Overall |
|--------------------|----------------------|-----|----|----|----|----|---------|
|                    | D1                   | D1b | D2 | D3 | D4 | D5 |         |
| Chan, 2013         | +                    | +   | +  | -  | -  | +  | -       |
| Francke, 1996      | +                    | +   | +  | +  | -  | +  | -       |
| Friese, 2019       | +                    | +   | +  | -  | +  | +  | -       |
| Happ, 2015         | +                    | +   | +  | +  | -  | +  | -       |
| Harrison, 2000     | +                    | +   | +  | +  | +  | +  | +       |
| Hasnain, 2019      | +                    | +   | +  | +  | -  | +  | -       |
| Huang, 2009        | +                    | +   | +  | -  | -  | +  | -       |
| Lim, 2020          | -                    | +   | +  | +  | +  | +  | -       |
| Reynolds, 2021     | +                    | +   | +  | +  | +  | +  | +       |
| Smeland, 2022      | +                    | +   | +  | +  | +  | +  | +       |
| Yang, 2019         | +                    | +   | +  | +  | -  | +  | -       |
| Yun, 2022          | +                    | +   | +  | +  | +  | +  | +       |
| Zarifsanaiey, 2022 | +                    | +   | -  | +  | +  | +  | -       |

Domains:  
 D1 : Bias arising from the randomization process.  
 D1b: Bias arising from the timing of identification and recruitment of individual participants in relation to timing of randomization.  
 D2 : Bias due to deviations from intended intervention.  
 D3 : Bias due to missing outcome data.  
 D4 : Bias in measurement of the outcome.  
 D5 : Bias in selection of the reported result.

Judgement  
 - High  
 - Some concerns  
 + Low

### Randomized controlled trials

| Study           | Risk of bias domains |    |    |    |    | Overall |
|-----------------|----------------------|----|----|----|----|---------|
|                 | D1                   | D2 | D3 | D4 | D5 |         |
| Arzani, 2020    | +                    | +  | +  | -  | -  | -       |
| Delvaux, 2004   | +                    | +  | +  | +  | +  | +       |
| deRuijter, 2018 | +                    | +  | +  | -  | +  | -       |
| Dudener, 2023   | +                    | -  | +  | -  | -  | -       |
| Jeihooni, 2018  | +                    | +  | +  | -  | +  | -       |
| Karvinen, 2017  | +                    | +  | +  | -  | +  | -       |
| Kavak, 2019     | +                    | +  | -  | +  | +  | -       |
| Kim, 2014       | +                    | +  | +  | -  | +  | -       |
| Morita, 2009    | +                    | +  | -  | -  | +  | -       |
| Morita, 2014    | +                    | +  | +  | -  | +  | -       |
| Ogden, 1997     | +                    | +  | +  | -  | +  | -       |
| Omidi, 2020     | +                    | -  | +  | -  | +  | -       |
| Vicdan, 2019    | +                    | +  | +  | +  | +  | +       |
| Woodcock, 1999  | +                    | -  | +  | -  | +  | -       |

Domains:  
 D1: Bias arising from the randomization process.  
 D2: Bias due to deviations from intended intervention.  
 D3: Bias due to missing outcome data.  
 D4: Bias in measurement of the outcome.  
 D5: Bias in selection of the reported result.

Judgement  
 - High  
 - Some concerns  
 + Low

### Non-randomized controlled studies

| Study             | Risk of bias domains |    |    |    |    |    |    | Overall |
|-------------------|----------------------|----|----|----|----|----|----|---------|
|                   | D1                   | D2 | D3 | D4 | D5 | D6 | D7 |         |
| Alhalal, 2020     | -                    | +  | +  | +  | +  | -  | +  | -       |
| Bagherzadeh, 2021 | -                    | +  | -  | +  | +  | -  | +  | -       |
| Edwards, 2007     | -                    | +  | +  | +  | +  | -  | +  | -       |
| Filmer, 2020      | -                    | +  | +  | +  | -  | -  | +  | -       |
| Hessig, 2004      | -                    | +  | +  | +  | -  | -  | +  | -       |
| Jo, 2015          | -                    | +  | +  | +  | +  | -  | +  | -       |
| Lin, 2008         | -                    | +  | +  | +  | +  | -  | +  | -       |
| Locke, 2011       | -                    | +  | +  | +  | -  | -  | +  | -       |
| Roelands, 2004    | -                    | +  | +  | +  | -  | -  | +  | -       |
| Sadeghi, 2018-1   | -                    | +  | +  | +  | -  | +  | +  | -       |
| Seo, 2020         | -                    | +  | +  | +  | +  | -  | +  | -       |

Domains:  
 D1: Bias due to confounding.  
 D2: Bias due to selection of participants.  
 D3: Bias in classification of interventions.  
 D4: Bias due to deviations from intended interventions.  
 D5: Bias due to missing data.  
 D6: Bias in measurement of outcomes.  
 D7: Bias in selection of the reported result.

Judgement  
 - Critical  
 - Serious  
 - Moderate  
 + Low

# Additional file 5. Detailed risk of bias assessment per outcome.

## OUTCOME: KNOWLEDGE

### Cluster randomized trials

| Study            | Risk of bias domains |     |    |    |    |    | Overall |
|------------------|----------------------|-----|----|----|----|----|---------|
|                  | D1                   | D1b | D2 | D3 | D4 | D5 |         |
| Chang, 2016      | +                    | +   | +  | +  | +  | +  | +       |
| Esche, 2015      | +                    | +   | +  | ⊗  | +  | +  | ⊗       |
| Friese, 2019     | +                    | +   | +  | -  | +  | +  | -       |
| Funk, 2017       | +                    | +   | +  | +  | +  | +  | +       |
| Gomarverdi, 2019 | +                    | +   | +  | +  | +  | +  | +       |
| Happ, 2015       | +                    | +   | +  | +  | +  | +  | +       |
| Hong, 1990       | +                    | +   | +  | +  | +  | +  | +       |
| Huang, 2009      | +                    | +   | +  | ⊗  | +  | +  | ⊗       |
| Johnston, 2007   | +                    | +   | +  | -  | +  | +  | -       |
| Jones, 1998      | +                    | +   | +  | +  | +  | +  | +       |
| Koh, 2009        | +                    | +   | +  | +  | +  | +  | +       |
| Kyriacos, 2015   | +                    | +   | +  | +  | +  | +  | +       |
| Lim, 2020        | ⊗                    | +   | +  | +  | +  | +  | ⊗       |
| Liu, 2010        | +                    | +   | +  | ⊗  | +  | +  | +       |
| Noome, 2017      | -                    | -   | +  | ⊗  | +  | +  | ⊗       |
| Passos, 2022     | +                    | +   | -  | +  | +  | +  | -       |
| Reynolds, 2021   | +                    | +   | +  | ⊗  | +  | +  | +       |
| Walsh, 2016      | +                    | +   | +  | +  | +  | +  | +       |
| Weaver, 2016     | +                    | +   | -  | +  | +  | +  | -       |
| Yang, 2019       | +                    | +   | +  | +  | ⊗  | +  | ⊗       |
| Yun, 2022        | +                    | +   | +  | +  | +  | +  | +       |
| Zarifसानای, 2022 | +                    | +   | -  | +  | +  | +  | -       |

Domains:  
D1 : Bias arising from the randomization process.  
D1b: Bias arising from the timing of identification and recruitment of individual participants in relation to timing of randomization.  
D2 : Bias due to deviations from intended intervention.  
D3 : Bias due to missing outcome data.  
D4 : Bias in measurement of the outcome.  
D5 : Bias in selection of the reported result.

Judgement  
⊗ High  
- Some concerns  
+ Low

### Randomized controlled trials

| Study                    | Risk of bias domains |    |    |    |    | Overall |
|--------------------------|----------------------|----|----|----|----|---------|
|                          | D1                   | D2 | D3 | D4 | D5 |         |
| Bano, 2022               | ⊗                    | -  | +  | -  | -  | ⊗       |
| Carrico, 2007            | +                    | ⊗  | +  | +  | +  | ⊗       |
| Day, 2001                | -                    | +  | +  | +  | +  | -       |
| deRuijter, 2018          | +                    | +  | +  | -  | +  | -       |
| Elzeky, 2022             | +                    | -  | +  | +  | +  | -       |
| Grommi, 2021             | +                    | -  | +  | +  | -  | -       |
| Jansson, 2014            | +                    | +  | +  | -  | +  | -       |
| Jansson, 2016b           | +                    | +  | -  | +  | +  | -       |
| Jansson, 2017            | +                    | +  | -  | +  | +  | -       |
| Jeihooni, 2018           | +                    | +  | +  | ⊗  | +  | ⊗       |
| Karvinen, 2017           | +                    | +  | +  | +  | +  | +       |
| Kavak, 2019              | +                    | +  | +  | +  | +  | +       |
| Kim, 2014                | +                    | +  | +  | +  | +  | +       |
| Kim, 2022                | -                    | -  | +  | +  | +  | -       |
| Maruyama, 2022           | +                    | ⊗  | +  | +  | -  | ⊗       |
| Morita, 2014             | +                    | +  | +  | -  | +  | -       |
| Ogden, 1997              | +                    | +  | +  | -  | +  | -       |
| Omidi, 2020              | +                    | ⊗  | +  | -  | +  | ⊗       |
| Rutherford-Hemming, 2016 | +                    | +  | +  | +  | +  | +       |
| Tsai, 2011a              | +                    | -  | +  | +  | +  | -       |
| Tsai, 2011b              | -                    | +  | +  | +  | +  | -       |
| Vicdan, 2019             | +                    | +  | +  | +  | +  | +       |
| Zhu, 2022                | ⊗                    | -  | +  | +  | +  | ⊗       |

Domains:  
D1: Bias arising from the randomization process.  
D2: Bias due to deviations from intended intervention.  
D3: Bias due to missing outcome data.  
D4: Bias in measurement of the outcome.  
D5: Bias in selection of the reported result.

Judgement  
⊗ High  
- Some concerns  
+ Low

### Non-randomized controlled studies

| Study           | Risk of bias domains |    |    |    |    |    |    | Overall |
|-----------------|----------------------|----|----|----|----|----|----|---------|
|                 | D1                   | D2 | D3 | D4 | D5 | D6 | D7 |         |
| Akande, 2020    | ⊗                    | +  | +  | +  | -  | -  | +  | ⊗       |
| Alhalal, 2020   | ⊗                    | +  | +  | +  | +  | -  | +  | ⊗       |
| Filmer, 2020    | -                    | +  | +  | +  | ⊗  | -  | +  | ⊗       |
| Hessig, 2004    | ⊗                    | +  | +  | +  | -  | -  | +  | ⊗       |
| Hlungwane, 2021 | -                    | +  | +  | +  | -  | -  | -  | -       |
| Lin, 2008       | ⊗                    | +  | +  | +  | +  | -  | +  | ⊗       |
| Memon, 2022     | -                    | +  | -  | +  | -  | -  | +  | -       |
| Mousavi, 2022   | -                    | +  | +  | +  | +  | -  | -  | -       |
| Park, 2021      | -                    | -  | -  | +  | -  | -  | -  | -       |
| Sadeghi, 2018-1 | ⊗                    | +  | +  | +  | -  | +  | +  | ⊗       |
| Seeley, 2008    | ⊗                    | ?  | +  | +  | ?  | -  | +  | ⊗       |
| Seo, 2020       | ⊗                    | +  | +  | +  | +  | -  | +  | ⊗       |
| Sung, 2008      | ⊗                    | +  | +  | +  | +  | -  | +  | ⊗       |
| Varghese, 2014  | ⊗                    | +  | +  | +  | +  | -  | +  | ⊗       |

Domains:  
D1: Bias due to confounding.  
D2: Bias due to selection of participants.  
D3: Bias in classification of interventions.  
D4: Bias due to deviations from intended interventions.  
D5: Bias due to missing data.  
D6: Bias in measurement of outcomes.  
D7: Bias in selection of the reported result.

Judgement  
⊗ Critical  
⊗ Serious  
- Moderate  
+ Low  
? No information

# Additional file 5. Detailed risk of bias assessment per outcome.

## OUTCOME: PERCEIVED CONTROL

### Cluster randomized trials

| Study            | Risk of bias domains |     |    |    |    |    | Overall |
|------------------|----------------------|-----|----|----|----|----|---------|
|                  | D1                   | D1b | D2 | D3 | D4 | D5 |         |
| Chan, 2013       | +                    | +   | +  | -  | -  | +  | -       |
| Galfin, 2011     | +                    | -   | +  | +  | +  | +  | -       |
| Hasselblad, 2022 | +                    | -   | +  | -  | +  | +  | -       |
| Liu, 2010        | +                    | +   | +  | +  | +  | +  | +       |
| Parker, 2013     | +                    | +   | +  | -  | +  | +  | -       |
| Yun, 2022        | +                    | +   | -  | +  | +  | +  | -       |

Domains:  
D1: Bias arising from the randomization process.  
D1b: Bias arising from the timing of identification and recruitment of individual participants in relation to timing of randomization.  
D2: Bias due to deviations from intended intervention.  
D3: Bias due to missing outcome data.  
D4: Bias in measurement of the outcome.  
D5: Bias in selection of the reported result.

Judgement  
- High  
- Some concerns  
+ Low

### Randomized controlled trials

| Study           | Risk of bias domains |    |    |    |    | Overall |
|-----------------|----------------------|----|----|----|----|---------|
|                 | D1                   | D2 | D3 | D4 | D5 |         |
| Bernburg, 2019  | +                    | +  | +  | -  | +  | -       |
| deRuijter, 2018 | +                    | +  | +  | -  | +  | -       |
| Jeihooni, 2018  | +                    | +  | +  | -  | +  | -       |
| Karvinen, 2017  | +                    | +  | +  | -  | +  | -       |
| Khodadadi, 2013 | -                    | -  | +  | -  | -  | -       |
| Kim, 2022       | -                    | -  | +  | +  | +  | -       |
| Morita, 2009    | +                    | +  | -  | -  | +  | -       |
| Morita, 2014    | +                    | +  | +  | -  | +  | -       |
| Ogden, 1997     | +                    | +  | +  | -  | +  | -       |
| Segal, 2015     | +                    | -  | -  | +  | +  | -       |
| Tsai, 2011a     | +                    | -  | +  | +  | +  | -       |
| Wilkinson, 2008 | +                    | +  | +  | -  | +  | -       |
| Woodcock, 1999  | +                    | -  | +  | -  | +  | -       |

Domains:  
D1: Bias arising from the randomization process.  
D2: Bias due to deviations from intended intervention.  
D3: Bias due to missing outcome data.  
D4: Bias in measurement of the outcome.  
D5: Bias in selection of the reported result.

Judgement  
- High  
- Some concerns  
+ Low

### Non-randomized controlled studies

| Study           | Risk of bias domains |    |    |    |    |    |    | Overall |
|-----------------|----------------------|----|----|----|----|----|----|---------|
|                 | D1                   | D2 | D3 | D4 | D5 | D6 | D7 |         |
| Alhalal, 2020   | -                    | +  | +  | +  | +  | -  | +  | -       |
| Edwards, 2007   | -                    | +  | +  | +  | +  | -  | +  | -       |
| Roelands, 2004  | -                    | +  | +  | +  | -  | -  | +  | -       |
| Sadeghi, 2018-1 | -                    | +  | +  | +  | -  | +  | +  | -       |
| Sung, 2008      | -                    | +  | +  | +  | +  | -  | +  | -       |

Domains:  
D1: Bias due to confounding.  
D2: Bias due to selection of participants.  
D3: Bias in classification of interventions.  
D4: Bias due to deviations from intended interventions.  
D5: Bias due to missing data.  
D6: Bias in measurement of outcomes.  
D7: Bias in selection of the reported result.

Judgement  
- Critical  
- Serious  
- Moderate  
+ Low

# Additional file 5. Detailed risk of bias assessment per outcome.

## OUTCOME: SOCIAL NORMS

### Cluster randomized trials

| Study           | Risk of bias domains |    |    |    |    | Overall |
|-----------------|----------------------|----|----|----|----|---------|
|                 | D1                   | D2 | D3 | D4 | D5 |         |
| deRuijter, 2018 | +                    | +  | +  | -  | +  | -       |

Domains:  
D1: Bias arising from the randomization process.  
D2: Bias due to deviations from intended intervention.  
D3: Bias due to missing outcome data.  
D4: Bias in measurement of the outcome.  
D5: Bias in selection of the reported result.

Judgement  
- Some concerns  
+ Low

### Randomized controlled trials

| Study          | Risk of bias domains |    |    |    |    |    |    | Overall |
|----------------|----------------------|----|----|----|----|----|----|---------|
|                | D1                   | D2 | D3 | D4 | D5 | D6 | D7 |         |
| Edwards, 2007  | ●                    | +  | +  | +  | +  | -  | +  | ●       |
| Roelands, 2004 | ●                    | +  | +  | +  | -  | -  | +  | ●       |

Domains:  
D1: Bias due to confounding.  
D2: Bias due to selection of participants.  
D3: Bias in classification of interventions.  
D4: Bias due to deviations from intended interventions.  
D5: Bias due to missing data.  
D6: Bias in measurement of outcomes.  
D7: Bias in selection of the reported result.

Judgement  
● Critical  
● Serious  
- Moderate  
+ Low

### Non-randomized controlled studies

| Study           | Risk of bias domains |     |    |    |    |    | Overall |
|-----------------|----------------------|-----|----|----|----|----|---------|
|                 | D1                   | D1b | D2 | D3 | D4 | D5 |         |
| Emamgholi, 2020 | -                    | +   | +  | +  | +  | +  | -       |
| Hasnain, 2019   | +                    | +   | +  | +  | +  | +  | +       |
| Jansink, 2013   | +                    | +   | +  | ●  | +  | +  | ●       |
| Lim, 2020       | ●                    | +   | +  | +  | +  | +  | ●       |

Domains:  
D1: Bias arising from the randomization process.  
D1b: Bias arising from the timing of identification and recruitment of individual participants in relation to timing of randomization.  
D2: Bias due to deviations from intended intervention.  
D3: Bias due to missing outcome data.  
D4: Bias in measurement of the outcome.  
D5: Bias in selection of the reported result.

Judgement  
● High  
- Some concerns  
+ Low

## OUTCOME: SKILLS

### Cluster randomized trials

| Study           | Risk of bias domains |     |    |    |    | Overall |    |
|-----------------|----------------------|-----|----|----|----|---------|----|
|                 | D1                   | D1b | D2 | D3 | D4 |         | D5 |
| Emamgholi, 2020 | -                    | +   | +  | +  | +  | +       | -  |
| Hasnain, 2019   | +                    | +   | +  | +  | +  | +       | +  |
| Jansink, 2013   | +                    | +   | +  | ●  | +  | +       | ●  |
| Lim, 2020       | ●                    | +   | +  | +  | +  | +       | ●  |

Domains:  
D1: Bias arising from the randomization process.  
D1b: Bias arising from the timing of identification and recruitment of individual participants in relation to timing of randomization.  
D2: Bias due to deviations from intended intervention.  
D3: Bias due to missing outcome data.  
D4: Bias in measurement of the outcome.  
D5: Bias in selection of the reported result.

Judgement  
● High  
- Some concerns  
+ Low

### Randomized controlled trials

| Study           | Risk of bias domains |    |    |    |    | Overall |
|-----------------|----------------------|----|----|----|----|---------|
|                 | D1                   | D2 | D3 | D4 | D5 |         |
| Day, 2001       | -                    | +  | +  | +  | +  | -       |
| Khodadadi, 2013 | ●                    | ●  | +  | -  | -  | ●       |
| Kim, 2022       | -                    | -  | +  | +  | +  | -       |
| Ghazali, 2020   | +                    | +  | +  | -  | +  | -       |
| Wang, 2022      | +                    | -  | +  | +  | -  | -       |
| Zhu, 2022       | -                    | -  | +  | +  | +  | -       |

Domains:  
D1: Bias arising from the randomization process.  
D2: Bias due to deviations from intended intervention.  
D3: Bias due to missing outcome data.  
D4: Bias in measurement of the outcome.  
D5: Bias in selection of the reported result.

Judgement  
● High  
- Some concerns  
+ Low

### Non-randomized controlled studies

| Study          | Risk of bias domains |    |    |    |    |    |    | Overall |
|----------------|----------------------|----|----|----|----|----|----|---------|
|                | D1                   | D2 | D3 | D4 | D5 | D6 | D7 |         |
| Noordman, 2014 | -                    | +  | +  | +  | -  | -  | +  | -       |
| Seeley, 2008   | ●                    | ?  | +  | +  | ?  | -  | +  | ●       |

Domains:  
D1: Bias due to confounding.  
D2: Bias due to selection of participants.  
D3: Bias in classification of interventions.  
D4: Bias due to deviations from intended interventions.  
D5: Bias due to missing data.  
D6: Bias in measurement of outcomes.  
D7: Bias in selection of the reported result.

Judgement  
● Critical  
- Moderate  
+ Low  
? No information
