# Supplementary material for: Effects of implementation strategies on nursing practice and patient outcomes: a comprehensive systematic review and meta-analysis
Source: PubMed Central journal article supplement — Implement Sci. 2024 Sep 30;19:68. doi: 10.1186/s13012-024-01398-0 (PMC11443951; doi:10.1186/s13012-024-01398-0), 2024-09-30
Supplement: 13012_2024_1398_MOESM6_ESM.pdf [file 13012_2024_1398_MOESM6_ESM.pdf]

# Additional file 6. Forest plots all comparisons and outcomes.

Attitude  
(dichotomous)

N/A

Skills  
(continuous)

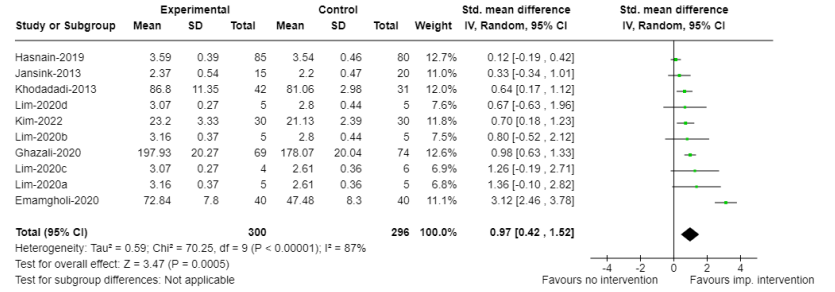

Attitude  
(continuous)

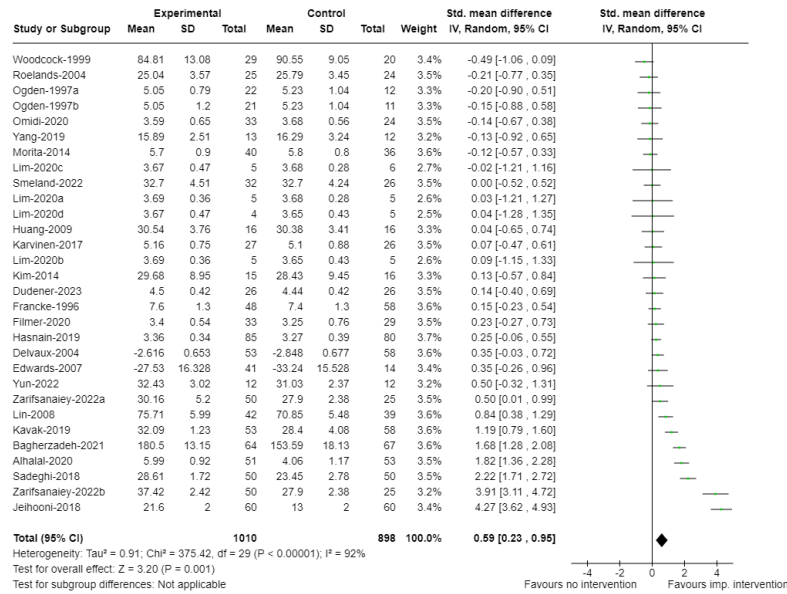

# Additional file 6. Forest plots all comparisons and outcomes.

## COMPARISON 2: MULTIFACETED STRATEGY VERSUS SINGLE COMPONENT STRATEGY

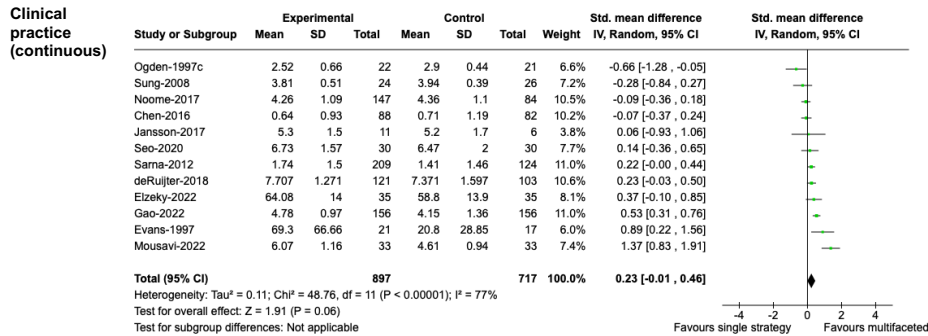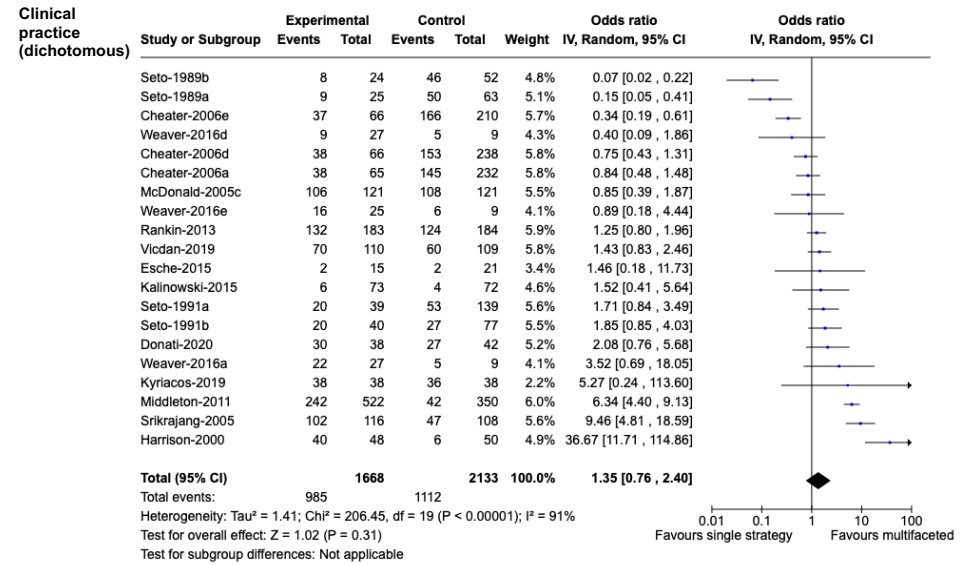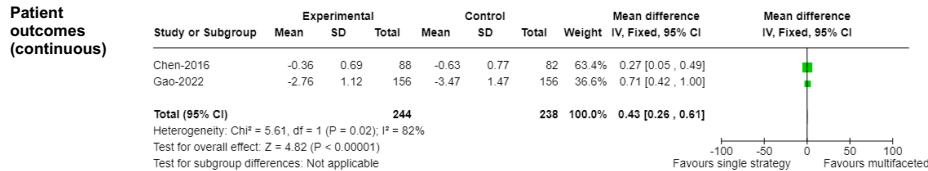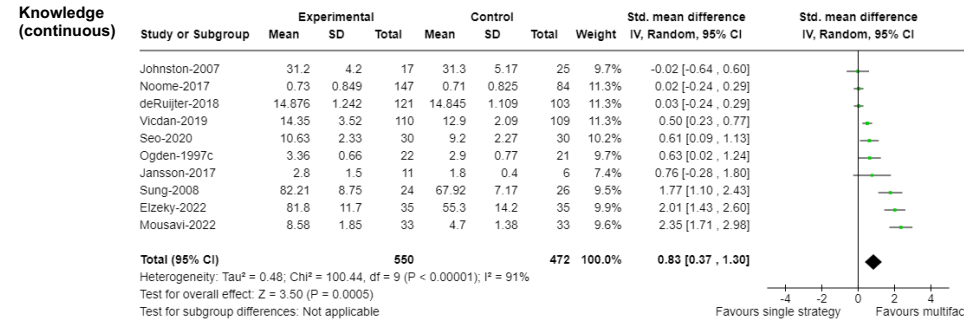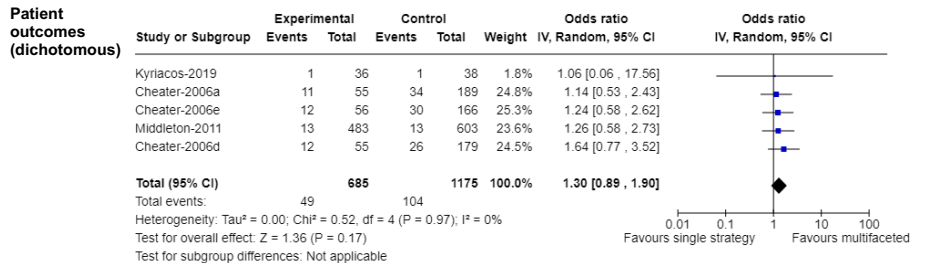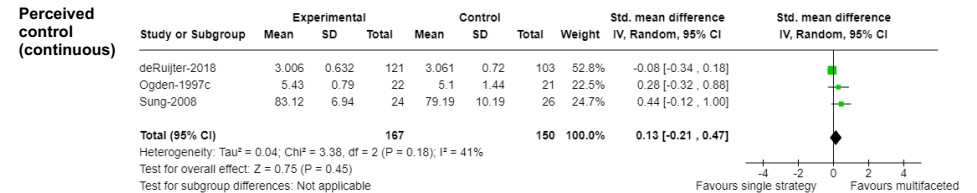

**Intention (continuous)** N/A

**Social norms (continuous)** N/A

**Attitude (dichotomous)** N/A

**Skills (continuous)** N/A

## Additional file 6. Forest plots all comparisons and outcomes.

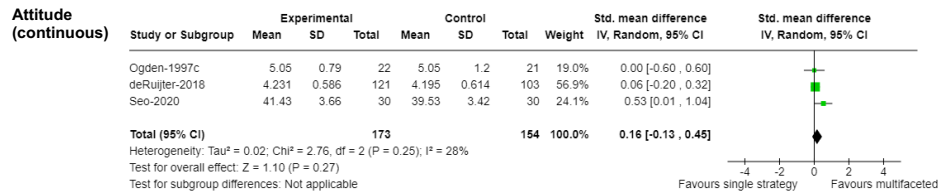





# Additional file 6. Forest plots all comparisons and outcomes.

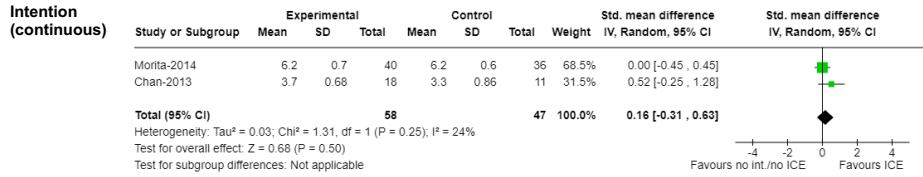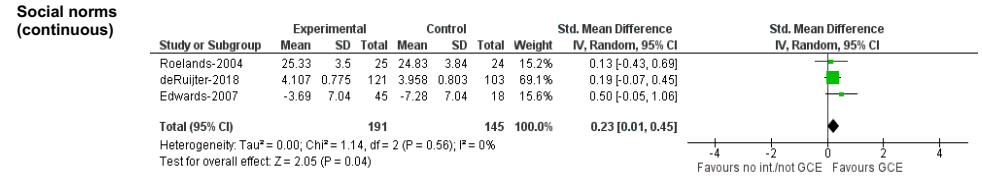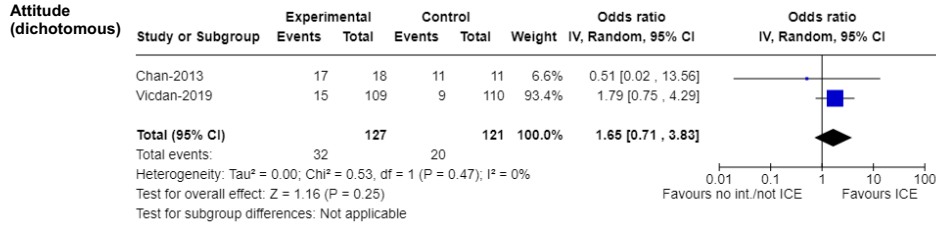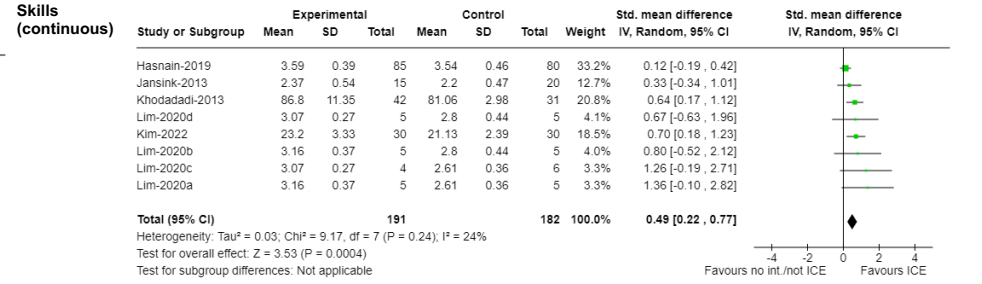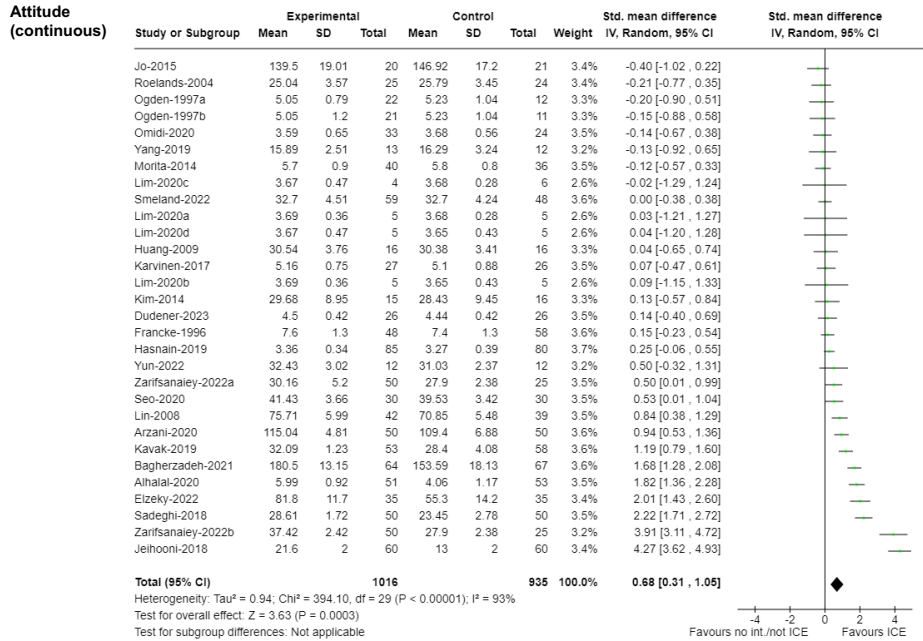







# Additional file 6. Forest plots all comparisons and outcomes.

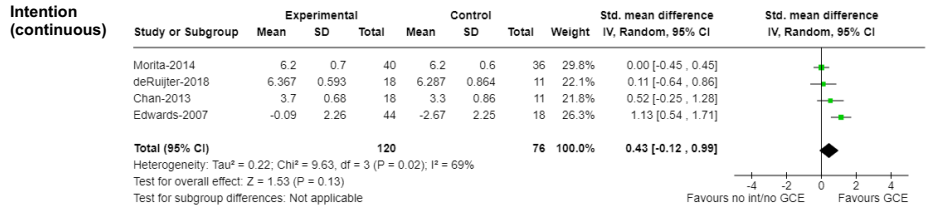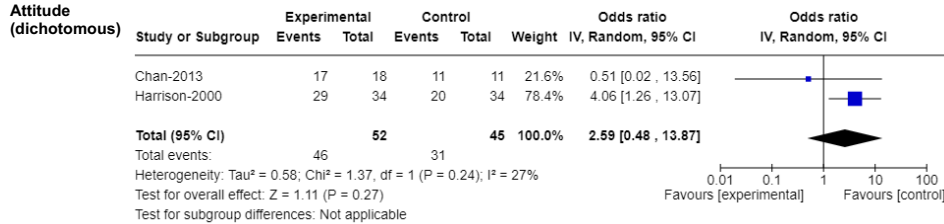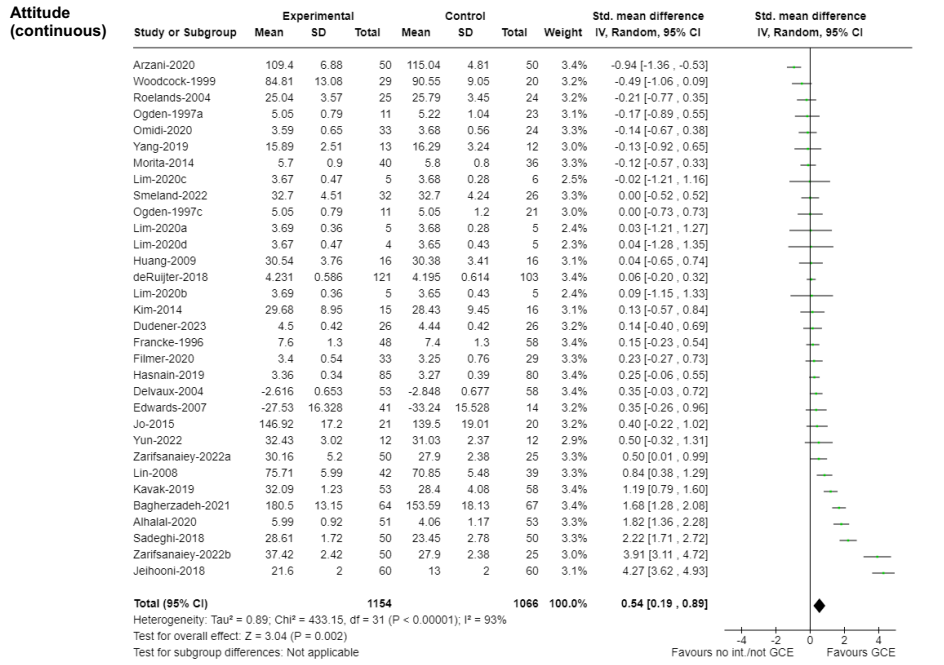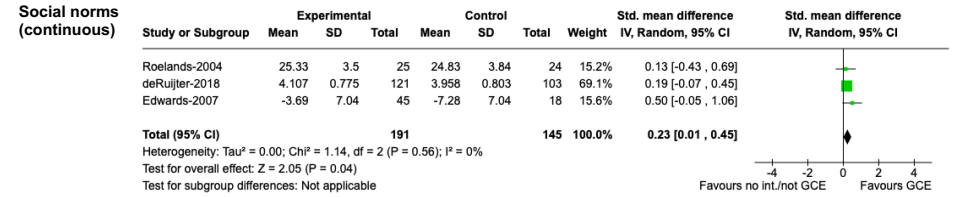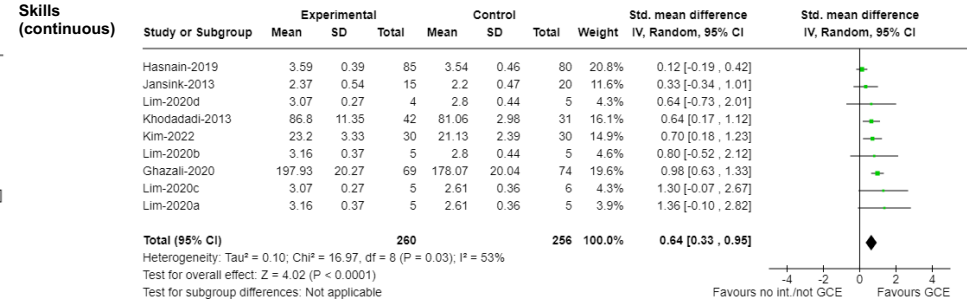

# Additional file 6. Forest plots all comparisons and outcomes.

## COMPARISON 5: STRATEGIES INCLUDING REMINDERS AS COMPARED TO NO INTERVENTION OR STRATEGIES THAT DID NOT INVOLVE REMINDERS

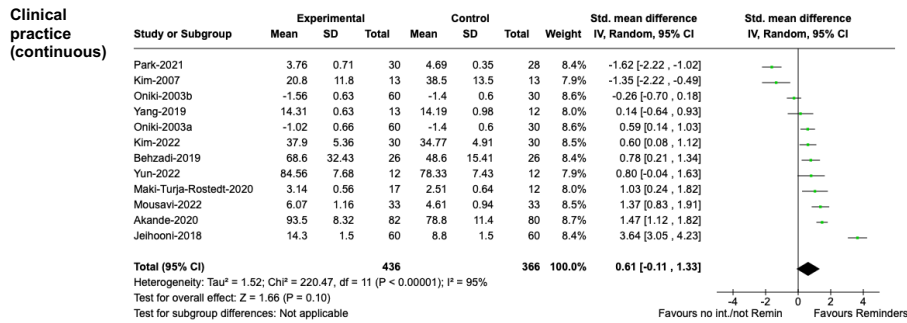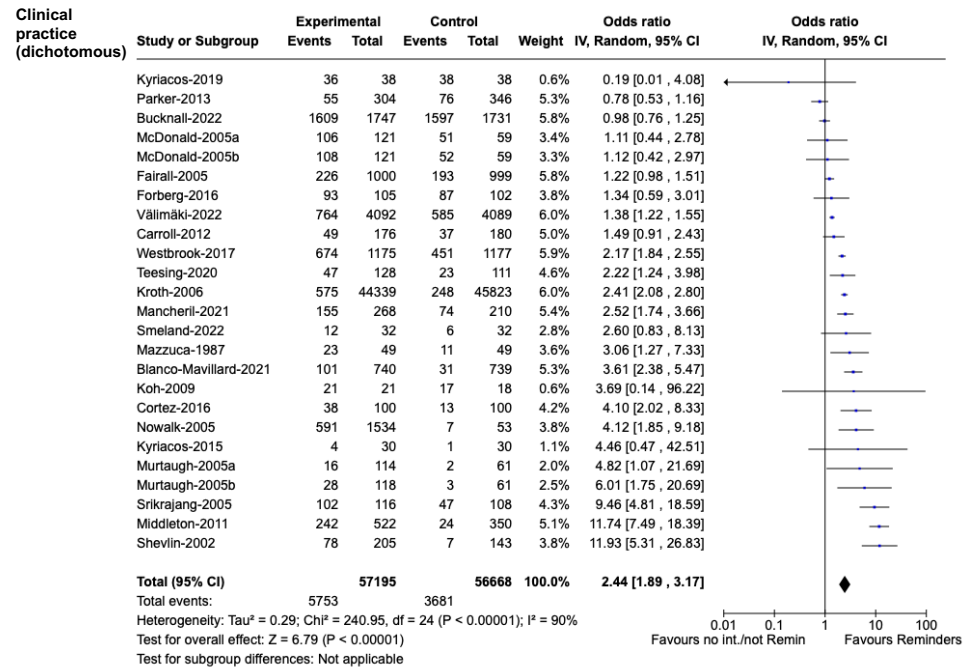

**Patient outcomes (continuous)** N/A

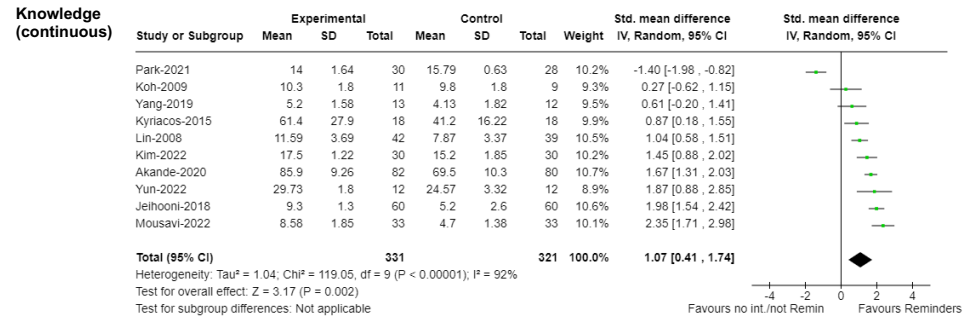

## Additional file 6. Forest plots all comparisons and outcomes.

### Patient outcomes (dichotomous)

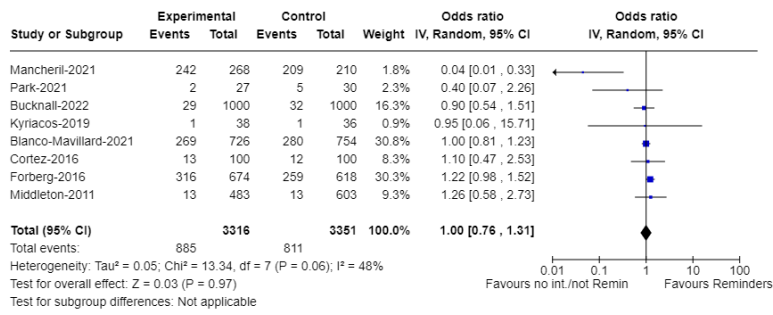

### Intention (continuous)

N/A

### Attitude (dichotomous)

N/A

### Attitude (continuous)

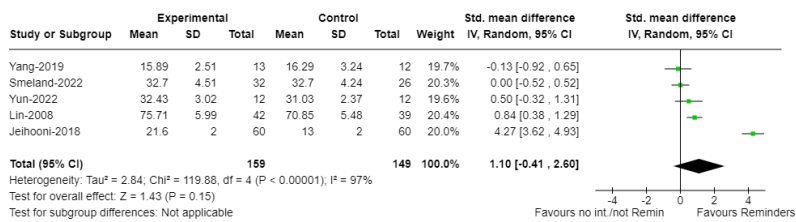

### Perceived control (continuous)

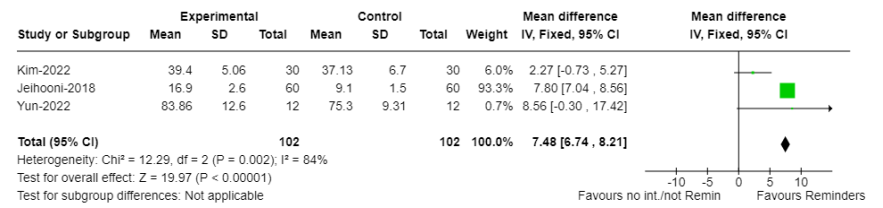

### Social norms (continuous)

N/A

### Skills (continuous)

N/A

# Additional file 6. Forest plots all comparisons and outcomes.

## COMPARISON 6: STRATEGIES INCLUDING PATIENT-MEDIATED INTERVENTION (PMI) AS COMPARED TO NO INTERVENTION OR STRATEGIES THAT DID NOT INVOLVE PMI

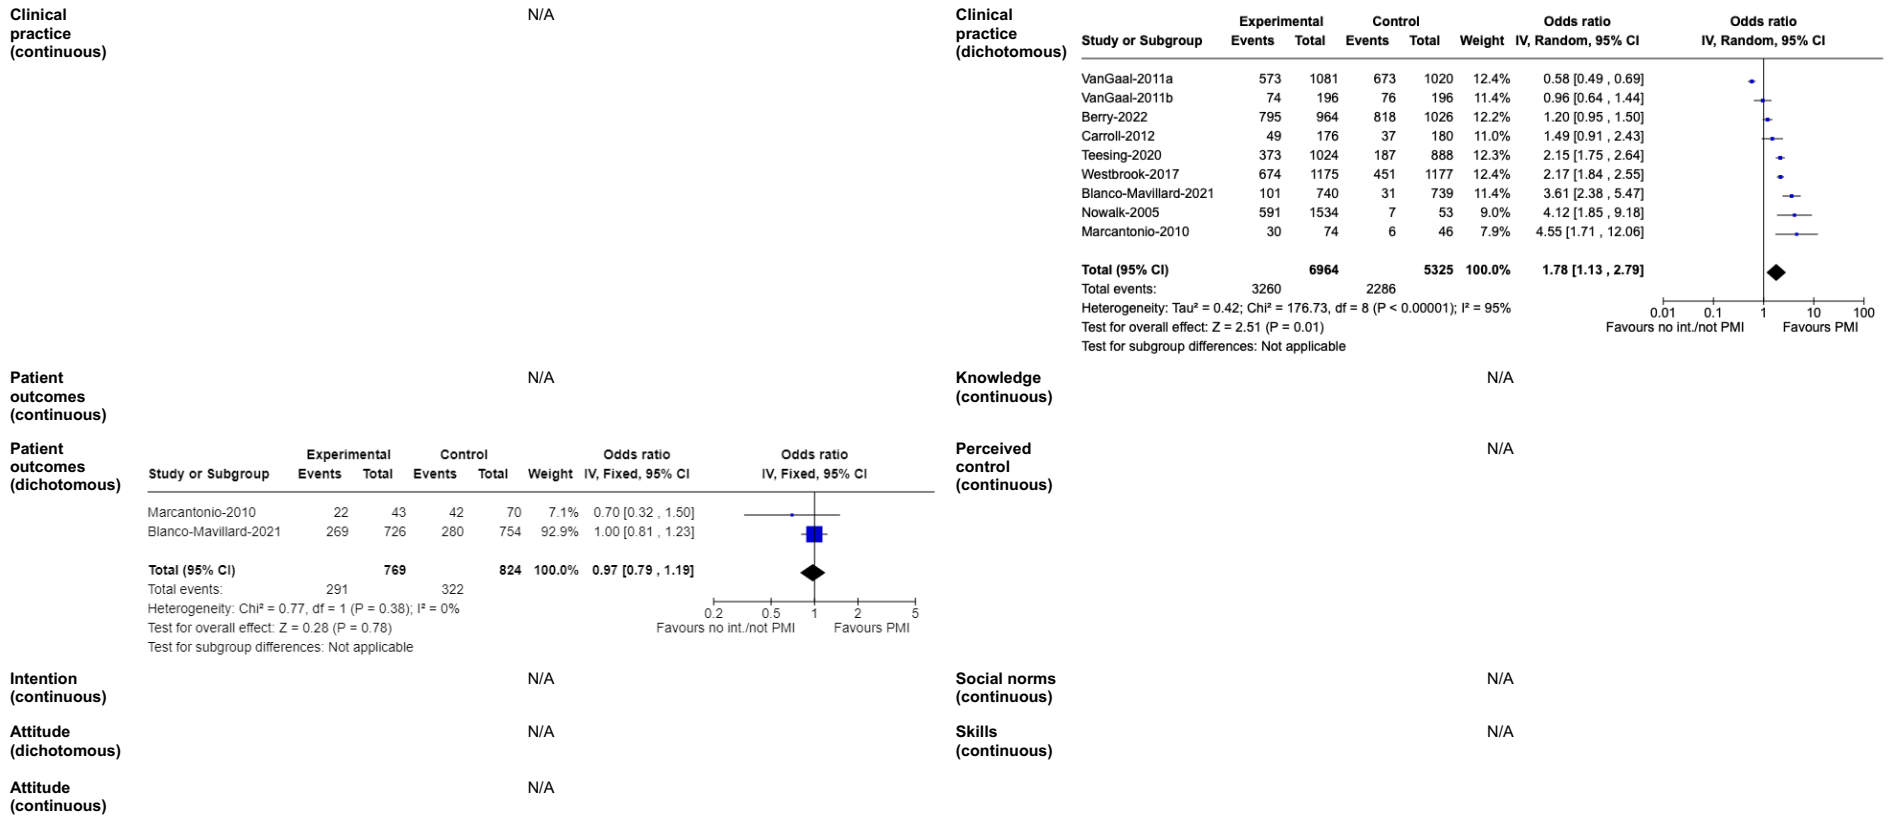

# Additional file 6. Forest plots all comparisons and outcomes.

## COMPARISON 7: STRATEGIES INCLUDING AUDIT AND FEEDBACK (A&F) AS COMPARED TO NO INTERVENTION OR STRATEGIES THAT DID NOT INVOLVE A&F

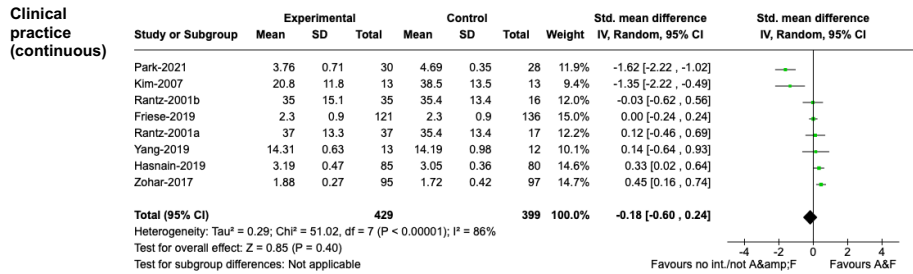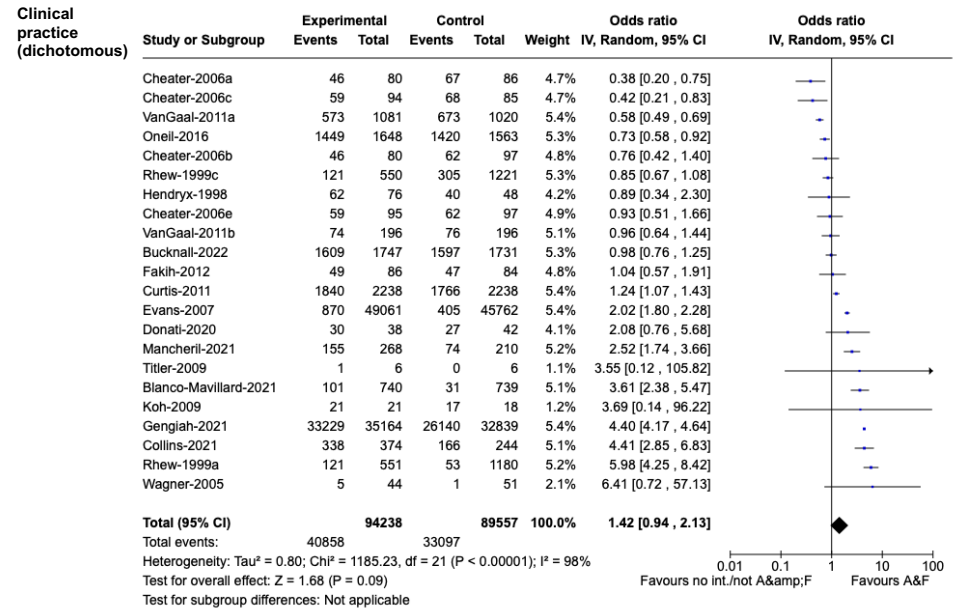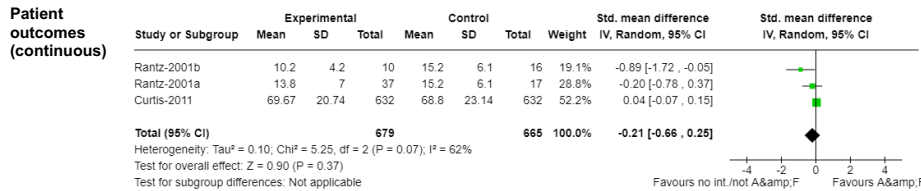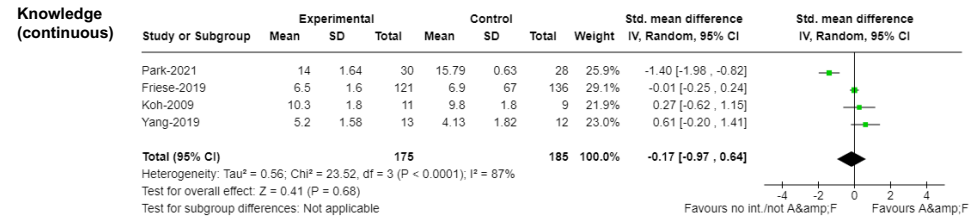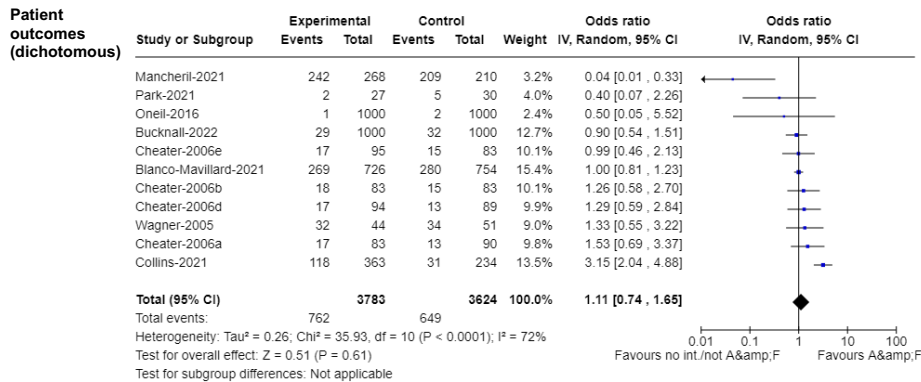

Intention (continuous)

N/A

Perceived control (continuous)

N/A

Social norms (continuous)

N/A

## Additional file 6. Forest plots all comparisons and outcomes.

Attitude  
(dichotomous)

N/A

Skills  
(continuous)

N/A

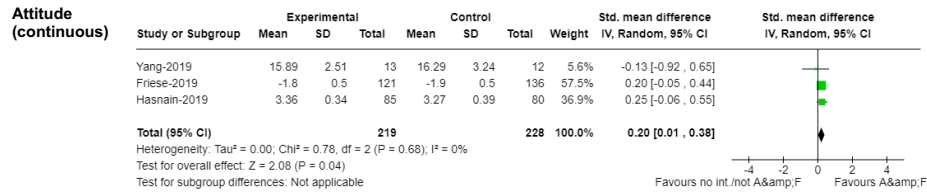



# Additional file 6. Forest plots all comparisons and outcomes.

## COMPARISON 8: STRATEGIES INCLUDING TAILORED INTERVENTION (TI) AS COMPARED TO NO INTERVENTION OR STRATEGIES THAT DID NOT INVOLVE TI

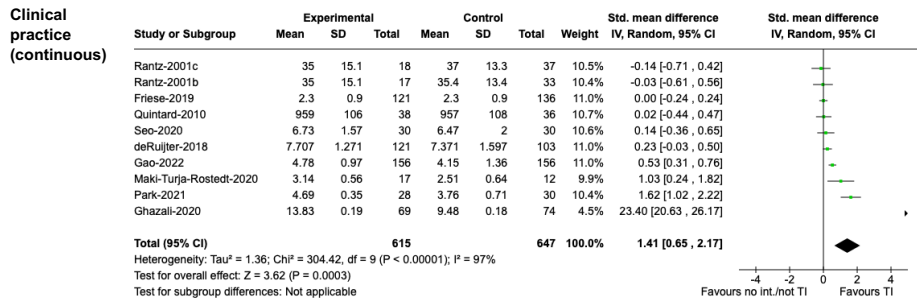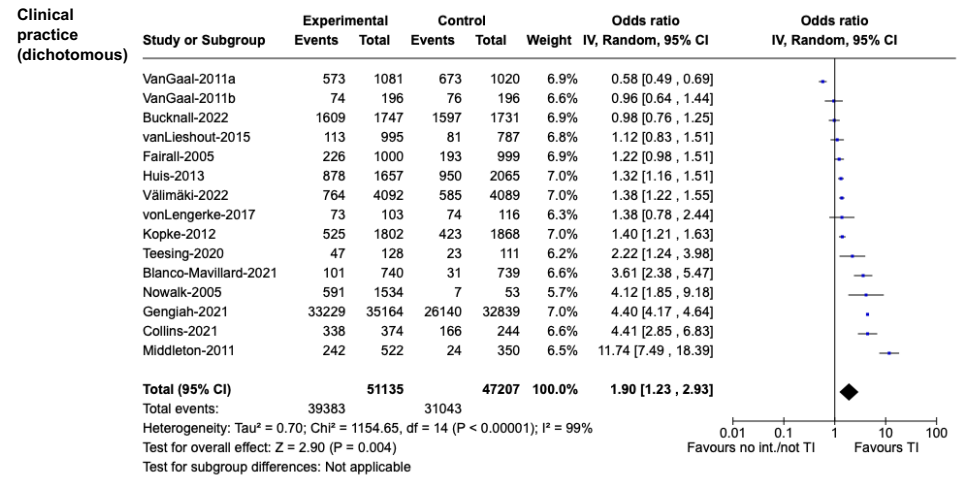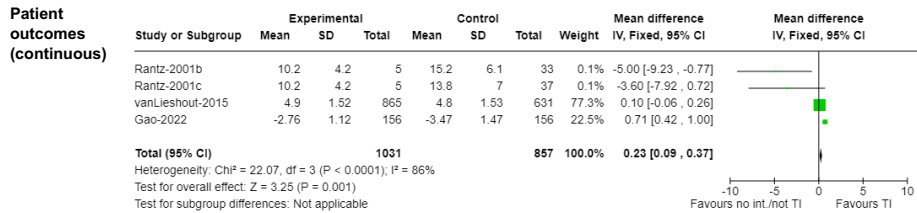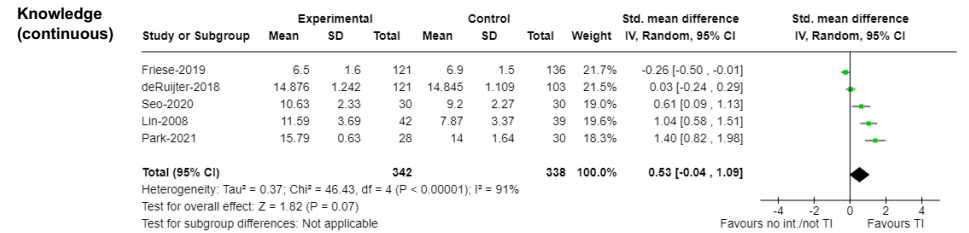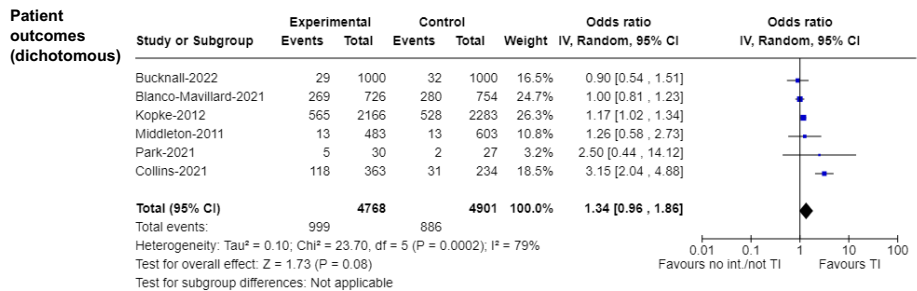

**Perceived control (continuous)** N/A

**Intention (continuous)** N/A

**Social norms (continuous)** N/A

**Attitude (dichotomous)** N/A

**Skills (continuous)** N/A

## Additional file 6. Forest plots all comparisons and outcomes.

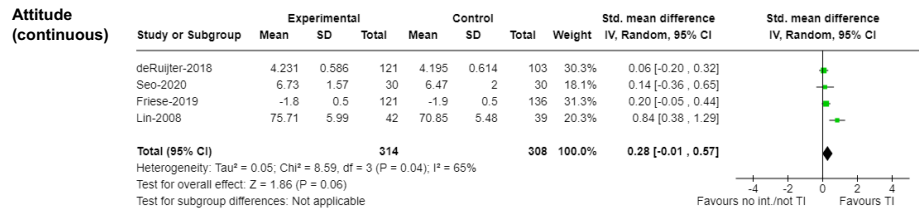

# Additional file 6. Forest plots all comparisons and outcomes.

## COMPARISON 9: STRATEGIES INCLUDING OPINION LEADERS (OLS) AS COMPARED TO NO INTERVENTION OR STRATEGIES THAT DID NOT INVOLVE OLS

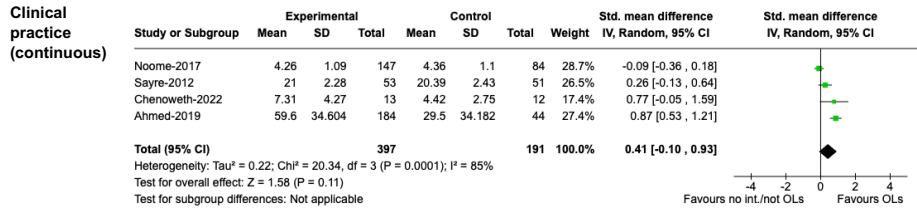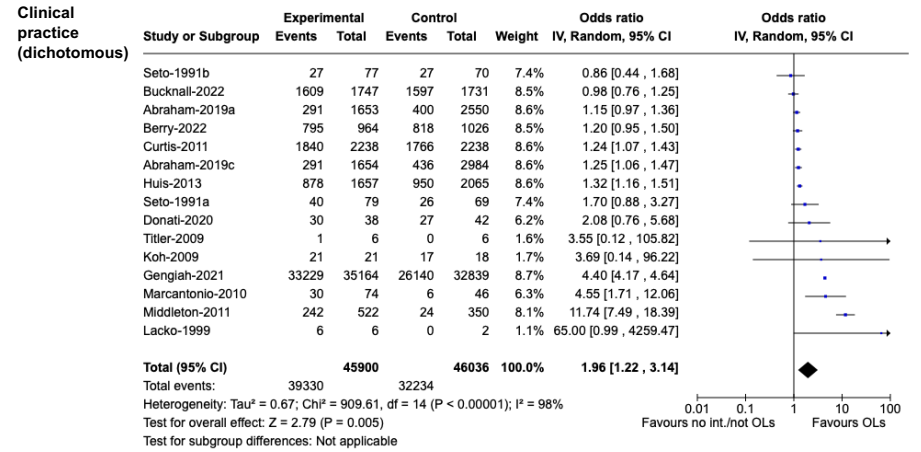

**Patient outcomes (continuous)** N/A

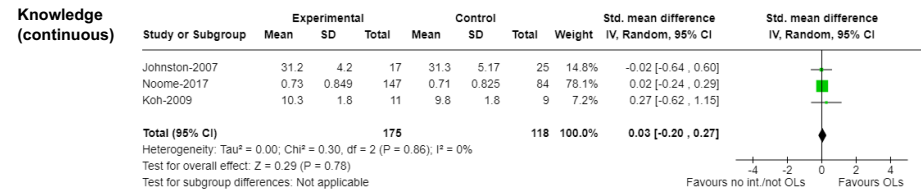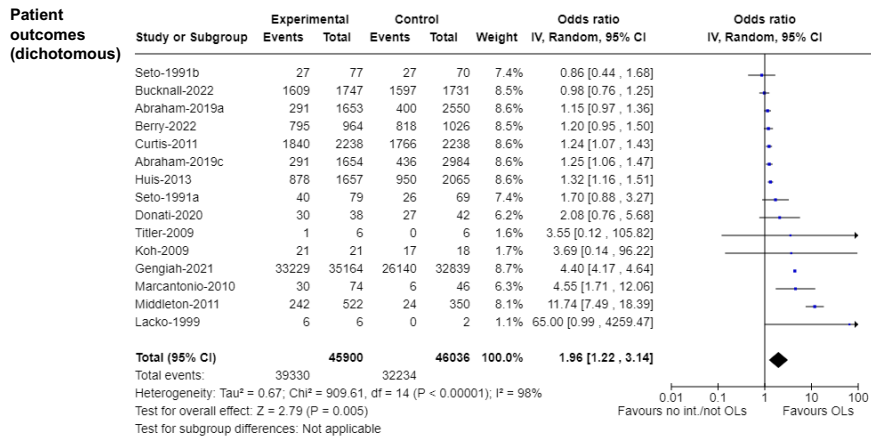

**Perceived control (continuous)** N/A

**Intention (continuous)** N/A

**Social norms (continuous)** N/A

**Attitude (dichotomous)** N/A

**Skills (continuous)** N/A

**Attitude (continuous)** N/A
