# Supplementary material for: Effects of implementation strategies on nursing practice and patient outcomes: a comprehensive systematic review and meta-analysis
Source: PubMed Central journal article supplement — Implement Sci. 2024 Sep 30;19:68. doi: 10.1186/s13012-024-01398-0 (PMC11443951; doi:10.1186/s13012-024-01398-0), 2024-09-30
Supplement: 13012_2024_1398_MOESM7_ESM.pdf [file 13012_2024_1398_MOESM7_ESM.pdf]

## Additional file 7. Clinical practice outcomes included in the meta-analyses.

| First author, publication year, country | Outcomes included in the meta-analyses                                                                       | Outcome name                                                                                                                           |
|-----------------------------------------|--------------------------------------------------------------------------------------------------------------|----------------------------------------------------------------------------------------------------------------------------------------|
| Abraham, 2019, Germany                  | <ul style="list-style-type: none"> <li>CP - Physical restraints</li> </ul>                                   | <ul style="list-style-type: none"> <li>Use of physical restraints - Mean prevalence of residents with any restraints (D)</li> </ul>    |
| Ahmed, 2019, India                      | <ul style="list-style-type: none"> <li>CP - Assessment/examination</li> </ul>                                | <ul style="list-style-type: none"> <li>Vital sign monitoring after admission (C)</li> </ul>                                            |
| Akande, 2019, Nigeria                   | <ul style="list-style-type: none"> <li>CP - Infection control</li> </ul>                                     | <ul style="list-style-type: none"> <li>Practice of TBIC (C)</li> </ul>                                                                 |
| Akrami, 2019, Iran                      | <ul style="list-style-type: none"> <li>CP - Care coordination</li> </ul>                                     | <ul style="list-style-type: none"> <li>Transfer quality (C)</li> </ul>                                                                 |
| Alhalal, 2020, Saudi Arabia             | <ul style="list-style-type: none"> <li>CP - Assessment/examination</li> </ul>                                | <ul style="list-style-type: none"> <li>Practice issues (C)</li> </ul>                                                                  |
| Aloush, 2007, Jordan                    | <ul style="list-style-type: none"> <li>CP - Infection control</li> </ul>                                     | <ul style="list-style-type: none"> <li>Compliance for VAP-prevention guidelines (C)</li> </ul>                                         |
| Antonini, 2021, Switzerland             | <ul style="list-style-type: none"> <li>None</li> </ul>                                                       | <ul style="list-style-type: none"> <li>N/A</li> </ul>                                                                                  |
| Arzani, 2020, Iran                      | <ul style="list-style-type: none"> <li>CP - Symptom management</li> </ul>                                    | <ul style="list-style-type: none"> <li>Practice scores about pain management in children 1 month after the intervention (C)</li> </ul> |
| Bagherzadeh, 2021, Iran                 | <ul style="list-style-type: none"> <li>CP - Counseling/provision of advice</li> </ul>                        | <ul style="list-style-type: none"> <li>Caring behavior dimension (total score) (C)</li> </ul>                                          |
| Bano, 2022, Pakistan                    | <ul style="list-style-type: none"> <li>CP - Infection control</li> </ul>                                     | <ul style="list-style-type: none"> <li>Practices (C)</li> </ul>                                                                        |
| Behzadi, 2019, Iran                     | <ul style="list-style-type: none"> <li>CP - Infection control</li> </ul>                                     | <ul style="list-style-type: none"> <li>Nurse's oral care performance score (C)</li> </ul>                                              |
| Bernbug, 2019, Germany                  | <ul style="list-style-type: none"> <li>CP - Counseling/Provision of advice</li> </ul>                        | <ul style="list-style-type: none"> <li>Quality of relationship to patients – Support (C)</li> </ul>                                    |
| Berry, 2022, USA                        | <ul style="list-style-type: none"> <li>CP – Immunization</li> </ul>                                          | <ul style="list-style-type: none"> <li>No. Residents vaccinated (D)</li> </ul>                                                         |
| Bittner, 2002, USA                      | <ul style="list-style-type: none"> <li>None</li> </ul>                                                       | <ul style="list-style-type: none"> <li>N/A</li> </ul>                                                                                  |
| Blanco-Mavillard, 2021, Spain           | <ul style="list-style-type: none"> <li>CP – Equipment management</li> </ul>                                  | <ul style="list-style-type: none"> <li>PIVCs with all recommendations completed (D)</li> </ul>                                         |
| Boumans, 2005, Netherlands              | <ul style="list-style-type: none"> <li>CP - Assessment/examination</li> </ul>                                | <ul style="list-style-type: none"> <li>Taking nursing history, nursing problems, etc. (C)</li> </ul>                                   |
| Brady, 2020, UK                         | <ul style="list-style-type: none"> <li>None</li> </ul>                                                       | <ul style="list-style-type: none"> <li>N/A</li> </ul>                                                                                  |
| Brennan, 2022, Australia                | <ul style="list-style-type: none"> <li>None</li> </ul>                                                       | <ul style="list-style-type: none"> <li>N/A</li> </ul>                                                                                  |
| Bruce, 2007, USA                        | <ul style="list-style-type: none"> <li>CP - Care coordination</li> </ul>                                     | <ul style="list-style-type: none"> <li>Number of patients referred for a mental health evaluation (D)</li> </ul>                       |
| Bucknall, 2022, Australia               | <ul style="list-style-type: none"> <li>CP – Documentation</li> </ul>                                         | <ul style="list-style-type: none"> <li>Proportion of audits with AT LEAST one vital sign measurement every 8 hours (D)</li> </ul>      |
| Carrico, 2007, USA                      | <ul style="list-style-type: none"> <li>None</li> </ul>                                                       | <ul style="list-style-type: none"> <li>N/A</li> </ul>                                                                                  |
| Carroll, 2012, USA                      | <ul style="list-style-type: none"> <li>CP - Documentation</li> </ul>                                         | <ul style="list-style-type: none"> <li>Fall risk documentation by nurses (D)</li> </ul>                                                |
| Chambers, 2022, Canada                  | <ul style="list-style-type: none"> <li>None</li> </ul>                                                       | <ul style="list-style-type: none"> <li>N/A</li> </ul>                                                                                  |
| Chan, 2013, Canada                      | <ul style="list-style-type: none"> <li>CP - Symptom management</li> </ul>                                    | <ul style="list-style-type: none"> <li>Overall use of at least one new pain-relieving strategy (C)</li> </ul>                          |
| Chang, 2016, Taiwan                     | <ul style="list-style-type: none"> <li>None</li> </ul>                                                       | <ul style="list-style-type: none"> <li>N/A</li> </ul>                                                                                  |
| Charrier, 2008, Italy                   | <ul style="list-style-type: none"> <li>None</li> </ul>                                                       | <ul style="list-style-type: none"> <li>N/A</li> </ul>                                                                                  |
| Cheater, 2006, UK                       | <ul style="list-style-type: none"> <li>CP - Assessment/examination</li> </ul>                                | <ul style="list-style-type: none"> <li>A1. History and examination (D)</li> </ul>                                                      |
| Chen, 2016, Taiwan                      | <ul style="list-style-type: none"> <li>CP - Symptom management</li> </ul>                                    | <ul style="list-style-type: none"> <li>Number of weekly pharmacologic strategies (C)</li> </ul>                                        |
| Chenoweth, 2022, Australia              | <ul style="list-style-type: none"> <li>CP - Counseling/provision of advice</li> </ul>                        | <ul style="list-style-type: none"> <li>QUIS positive (C)</li> </ul>                                                                    |
| Cleland, 2007, UK                       | <ul style="list-style-type: none"> <li>CP - Prescription</li> </ul>                                          | <ul style="list-style-type: none"> <li>No. of <math>\beta_2</math>-agonist inhalers prescribed in previous 12 months (C)</li> </ul>    |
| Collins, 2021, Tajikistan               | <ul style="list-style-type: none"> <li>CP - Documentation</li> </ul>                                         | <ul style="list-style-type: none"> <li>Smoking status recorded (D)</li> </ul>                                                          |
| Cone, 1996, USA                         | <ul style="list-style-type: none"> <li>CP - Documentation</li> </ul>                                         | <ul style="list-style-type: none"> <li>Neurologic documentation by nurses (C)</li> </ul>                                               |
| Cortez, 2016, USA                       | <ul style="list-style-type: none"> <li>CP - Documentation</li> </ul>                                         | <ul style="list-style-type: none"> <li>Documentation of evidence-based interventions (all symptoms) (D)</li> </ul>                     |
| Curtis, 2011, USA                       | <ul style="list-style-type: none"> <li>CP – Assessment/examination</li> </ul>                                | <ul style="list-style-type: none"> <li>End-of-life Care: Documented Pain Assessment in the last 24 hours (D)</li> </ul>                |
| Daly, 2009, Australia                   | <ul style="list-style-type: none"> <li>CP - Assessment/examination</li> </ul>                                | <ul style="list-style-type: none"> <li>Substance use history taken by nurses (D)</li> </ul>                                            |
| Davies, 2002, Canada                    | <ul style="list-style-type: none"> <li>CP - Assessment/examination</li> </ul>                                | <ul style="list-style-type: none"> <li>Rates of electronic fetal monitoring by nurses (D)</li> </ul>                                   |
| Day, 2001, UK                           | <ul style="list-style-type: none"> <li>None</li> </ul>                                                       | <ul style="list-style-type: none"> <li>N/A</li> </ul>                                                                                  |
| De Barbieri, 2020, Italy                | <ul style="list-style-type: none"> <li>CP - Counseling/provision of advice</li> </ul>                        | <ul style="list-style-type: none"> <li>Perceived quality of nursing care (C)</li> </ul>                                                |
| deRond, 2000, Netherlands               | <ul style="list-style-type: none"> <li>CP - Medication administration</li> <li>CP – Documentation</li> </ul> | <ul style="list-style-type: none"> <li>Total analgesics administered (D)</li> <li>Total pain documentation score (C)</li> </ul>        |
| Delvaux, 2004, Belgium                  | <ul style="list-style-type: none"> <li>CP - Counseling/Provision of advice</li> </ul>                        | <ul style="list-style-type: none"> <li>Statement and response (C)</li> </ul>                                                           |
| DeRuijter, 2018, Netherlands            | <ul style="list-style-type: none"> <li>CP - Counseling/provision of advice</li> </ul>                        | <ul style="list-style-type: none"> <li>Guideline adherence (C)</li> </ul>                                                              |
| Donati, 2020, Italy                     | <ul style="list-style-type: none"> <li>CP - Infection control</li> </ul>                                     | <ul style="list-style-type: none"> <li>Observed compliance with the WHO 5 moments of hand hygiene (D)</li> </ul>                       |
| Dudener, 2023, Turkey                   | <ul style="list-style-type: none"> <li>CP - Counseling/provision of advice</li> </ul>                        | <ul style="list-style-type: none"> <li>Caring Behaviors Scale (C)</li> </ul>                                                           |

## Additional file 7. Clinical practice outcomes included in the meta-analyses.

|                               |                                                                                       |                                                                                                                                                            |
|-------------------------------|---------------------------------------------------------------------------------------|------------------------------------------------------------------------------------------------------------------------------------------------------------|
| Edwards, 2007, Australia      | <ul style="list-style-type: none"> <li>CP - Medication administration</li> </ul>      | <ul style="list-style-type: none"> <li>Temperature when an antipyretic was administered (C)</li> </ul>                                                     |
| Elahi, 2021, Iran             | <ul style="list-style-type: none"> <li>CP - Counseling/provision of advice</li> </ul> | <ul style="list-style-type: none"> <li>Caring Behavior (C)</li> </ul>                                                                                      |
| Elzeky, 2022, Egypt           | <ul style="list-style-type: none"> <li>CP - Assessment/examination</li> </ul>         | <ul style="list-style-type: none"> <li>Total performance score (C)</li> </ul>                                                                              |
| Emamgholi, 2020, Iran         | <ul style="list-style-type: none"> <li>CP - Other</li> </ul>                          | <ul style="list-style-type: none"> <li>Total score - Performance score (including Flushing, Dressing change, Medication and fluid infusion) (C)</li> </ul> |
| Esche, 2015, USA              | <ul style="list-style-type: none"> <li>CP – Documentation</li> </ul>                  | <ul style="list-style-type: none"> <li>PrU Documentation (D)</li> </ul>                                                                                    |
| Evans, 1997, USA              | <ul style="list-style-type: none"> <li>CP - Assessment/examination</li> </ul>         | <ul style="list-style-type: none"> <li>Identification and Treatment of Asthma Patients (C)</li> </ul>                                                      |
| Evans, 2007, Australia        | <ul style="list-style-type: none"> <li>CP - Incident reporting</li> </ul>             | <ul style="list-style-type: none"> <li>Reporting rate (D)</li> </ul>                                                                                       |
| Fabre, 2020, USA              | <ul style="list-style-type: none"> <li>None</li> </ul>                                | <ul style="list-style-type: none"> <li>N/A</li> </ul>                                                                                                      |
| Fairall, 2005, South Africa   | <ul style="list-style-type: none"> <li>CP - Testing/screening</li> </ul>              | <ul style="list-style-type: none"> <li>Sputum screening for TB (D)</li> </ul>                                                                              |
| Fakih, 2012, USA              | <ul style="list-style-type: none"> <li>CP - Documentation</li> </ul>                  | <ul style="list-style-type: none"> <li>Accurate documentation on dressing (D)</li> </ul>                                                                   |
| Feldman, 2004, USA            | <ul style="list-style-type: none"> <li>CP – Care coordination</li> </ul>              | <ul style="list-style-type: none"> <li>Skilled Nursing Visits delivered within 90 days (C)</li> </ul>                                                      |
| Filmer, 2020, Germany         | <ul style="list-style-type: none"> <li>CP - Counseling/provision of advice</li> </ul> | <ul style="list-style-type: none"> <li>Self-reported cross-cultural behavior - Cultural communication (C)</li> </ul>                                       |
| Forberg, 2016, Sweden         | <ul style="list-style-type: none"> <li>CP - Infection control</li> </ul>              | <ul style="list-style-type: none"> <li>Hand disinfection (D)</li> </ul>                                                                                    |
| Francke, 1996, Netherlands    | <ul style="list-style-type: none"> <li>CP - Counseling/provision of advice</li> </ul> | <ul style="list-style-type: none"> <li>Quality of psychosocial interventions, general (C)</li> </ul>                                                       |
| Francke, 1997, Netherlands    | <ul style="list-style-type: none"> <li>CP - Assessment/examination</li> </ul>         | <ul style="list-style-type: none"> <li>Number of pain intensity assessments (C)</li> </ul>                                                                 |
| Friese, 2019, USA             | <ul style="list-style-type: none"> <li>CP - Infection control</li> </ul>              | <ul style="list-style-type: none"> <li>PPE Use (C)</li> </ul>                                                                                              |
| Funk, 2017, USA               | <ul style="list-style-type: none"> <li>CP - Assessment/examination</li> </ul>         | <ul style="list-style-type: none"> <li>Accurate rhythm interpretation (D)</li> </ul>                                                                       |
| Galfin, 2011, UK              | <ul style="list-style-type: none"> <li>CP - Counseling/provision of advice</li> </ul> | <ul style="list-style-type: none"> <li>Asked about psychological wellbeing (C)</li> </ul>                                                                  |
| Gao, 2022, China              | <ul style="list-style-type: none"> <li>CP - Symptom Management</li> </ul>             | <ul style="list-style-type: none"> <li>Nursing satisfaction regarding Surgical Pain Control (C)</li> </ul>                                                 |
| Gengiah, 2021, South Africa   | <ul style="list-style-type: none"> <li>CP – Testing/Screening</li> </ul>              | <ul style="list-style-type: none"> <li>HTS for PHC clinic attendees (D)</li> </ul>                                                                         |
| Ghazali, 2020, Malaysia       | <ul style="list-style-type: none"> <li>CP - Assessment/examination</li> </ul>         | <ul style="list-style-type: none"> <li>PSBQ (C)</li> </ul>                                                                                                 |
| Gomarverdi, 2019, Iran        | <ul style="list-style-type: none"> <li>CP - Infection control</li> </ul>              | <ul style="list-style-type: none"> <li>Adherence to SP guidelines (C)</li> </ul>                                                                           |
| Gould, 1997, UK               | <ul style="list-style-type: none"> <li>CP - Infection control</li> </ul>              | <ul style="list-style-type: none"> <li>Frequency of hand decontamination (C)</li> </ul>                                                                    |
| Grommi, 2021, Finland         | <ul style="list-style-type: none"> <li>CP – Documentation</li> </ul>                  | <ul style="list-style-type: none"> <li>Documentation audit score (C)</li> </ul>                                                                            |
| Hammersley, 2014, UK          | <ul style="list-style-type: none"> <li>None</li> </ul>                                | <ul style="list-style-type: none"> <li>N/A</li> </ul>                                                                                                      |
| Happ, 2014, USA               | <ul style="list-style-type: none"> <li>CP - Counseling/provision of advice</li> </ul> | <ul style="list-style-type: none"> <li>Frequency mean number of communication acts in an exchange (MNAE) (C)</li> </ul>                                    |
| Happ, 2015, USA               | <ul style="list-style-type: none"> <li>None</li> </ul>                                | <ul style="list-style-type: none"> <li>N/A</li> </ul>                                                                                                      |
| Harrison, 2000, South Africa  | <ul style="list-style-type: none"> <li>CP - Care coordination</li> </ul>              | <ul style="list-style-type: none"> <li>Appropriately managed (D)</li> </ul>                                                                                |
| Hasnain, 2019, Australia      | <ul style="list-style-type: none"> <li>CP - Medication administration</li> </ul>      | <ul style="list-style-type: none"> <li>Domain 1 score = performance indicator (C)</li> </ul>                                                               |
| Hasselblad, 2022, USA         | <ul style="list-style-type: none"> <li>CP - Medication administration</li> </ul>      | <ul style="list-style-type: none"> <li>Use of PRN medication (D)</li> </ul>                                                                                |
| Hendryx, 1998, USA            | <ul style="list-style-type: none"> <li>CP - Testing/screening</li> </ul>              | <ul style="list-style-type: none"> <li>Laboratory work (D)</li> </ul>                                                                                      |
| Hessig, 2004, USA             | <ul style="list-style-type: none"> <li>None</li> </ul>                                | <ul style="list-style-type: none"> <li>N/A</li> </ul>                                                                                                      |
| Hlungwane, 2021, South Africa | <ul style="list-style-type: none"> <li>CP - Equipment Management</li> </ul>           | <ul style="list-style-type: none"> <li>Practice score (C)</li> </ul>                                                                                       |
| Hödl, 2019, Netherlands       | <ul style="list-style-type: none"> <li>None</li> </ul>                                | <ul style="list-style-type: none"> <li>N/A</li> </ul>                                                                                                      |
| Hong, 1990, Hong Kong         | <ul style="list-style-type: none"> <li>None</li> </ul>                                | <ul style="list-style-type: none"> <li>N/A</li> </ul>                                                                                                      |
| Huang, 2009, Taiwan           | <ul style="list-style-type: none"> <li>CP - Physical restraints</li> </ul>            | <ul style="list-style-type: none"> <li>Practice (C)</li> </ul>                                                                                             |
| Huis, 2013, Netherlands       | <ul style="list-style-type: none"> <li>CP - Infection control</li> </ul>              | <ul style="list-style-type: none"> <li>Compliance with hand hygiene prescription (D)</li> </ul>                                                            |
| Huizing, 2006, Netherlands    | <ul style="list-style-type: none"> <li>CP – Physical restraints</li> </ul>            | <ul style="list-style-type: none"> <li>Psycho-geriatric nursing home residents restrained (D)</li> </ul>                                                   |
| Huizing, 2009, Netherlands    | <ul style="list-style-type: none"> <li>CP – Physical restraints</li> </ul>            | <ul style="list-style-type: none"> <li>Restrained status - not restrained (D)</li> </ul>                                                                   |
| Hutchinson, 2020, Australia   | <ul style="list-style-type: none"> <li>None</li> </ul>                                | <ul style="list-style-type: none"> <li>N/A</li> </ul>                                                                                                      |
| Jansink, 2013, Netherlands    | <ul style="list-style-type: none"> <li>CP - Counseling/provision of advice</li> </ul> | <ul style="list-style-type: none"> <li>Motivational interviewing mean score (s.d.) on the BECCI (C)</li> </ul>                                             |
| Jansson, 2014, Finland        | <ul style="list-style-type: none"> <li>None</li> </ul>                                | <ul style="list-style-type: none"> <li>N/A</li> </ul>                                                                                                      |
| Jansson, 2016, Finland        | <ul style="list-style-type: none"> <li>None</li> </ul>                                | <ul style="list-style-type: none"> <li>N/A</li> </ul>                                                                                                      |
| Jansson, 2017, Finland        | <ul style="list-style-type: none"> <li>CP - Equipment management</li> </ul>           | <ul style="list-style-type: none"> <li>Skills in adhering to current oral care recommendations (C)</li> </ul>                                              |
| Jeihooni, 2018, Iran          | <ul style="list-style-type: none"> <li>CP - Infection control</li> </ul>              | <ul style="list-style-type: none"> <li>Performance (C)</li> </ul>                                                                                          |
| Jo, 2015, South Korea         | <ul style="list-style-type: none"> <li>CP - Symptom management</li> </ul>             | <ul style="list-style-type: none"> <li>Physical care (C)</li> </ul>                                                                                        |
| Johnson, 2019, Australia      | <ul style="list-style-type: none"> <li>CP - Medication administration</li> </ul>      | <ul style="list-style-type: none"> <li>Number of interruptions per 100 medications (C)</li> </ul>                                                          |
| Johnston, 2007, Canada        | <ul style="list-style-type: none"> <li>None</li> </ul>                                | <ul style="list-style-type: none"> <li>N/A</li> </ul>                                                                                                      |
| Jones, 1998, UK               | <ul style="list-style-type: none"> <li>CP – Care coordination</li> </ul>              | <ul style="list-style-type: none"> <li>Percentage positioned correctly (D)</li> </ul>                                                                      |

## Additional file 7. Clinical practice outcomes included in the meta-analyses.

|                                   |                                                                                       |                                                                                                                                                                               |
|-----------------------------------|---------------------------------------------------------------------------------------|-------------------------------------------------------------------------------------------------------------------------------------------------------------------------------|
| Kalinowski, 2015, Germany         | <ul style="list-style-type: none"> <li>CP – Symptom management</li> </ul>             | <ul style="list-style-type: none"> <li>Applied NPT nurses (D)</li> </ul>                                                                                                      |
| Kaner, 2003, UK                   | <ul style="list-style-type: none"> <li>None</li> </ul>                                | <ul style="list-style-type: none"> <li>N/A</li> </ul>                                                                                                                         |
| Karvinen, 2017, Canada            | <ul style="list-style-type: none"> <li>CP - Counseling/provision of advice</li> </ul> | <ul style="list-style-type: none"> <li>Self-reported counseling practices (C)</li> </ul>                                                                                      |
| Kavak, 2019, Turkey               | <ul style="list-style-type: none"> <li>CP - Physical restraints</li> </ul>            | <ul style="list-style-type: none"> <li>Practices Regarding the Use of Physical Restraint (C)</li> </ul>                                                                       |
| Khodadadi, 2013, Iran             | <ul style="list-style-type: none"> <li>CP - Counseling/provision of advice</li> </ul> | <ul style="list-style-type: none"> <li>Quality of care (C)</li> </ul>                                                                                                         |
| Kim, 2007, South Korea            | <ul style="list-style-type: none"> <li>CP - Infection control</li> </ul>              | <ul style="list-style-type: none"> <li>Compliance of aseptic technique (C)</li> </ul>                                                                                         |
| Kim, 2014, South Korea            | <ul style="list-style-type: none"> <li>CP - Counseling/provision of advice</li> </ul> | <ul style="list-style-type: none"> <li>Sexual Health Care Practice (C)</li> </ul>                                                                                             |
| Kim, 2022, South Korea            | <ul style="list-style-type: none"> <li>CP - Assessment/examination</li> </ul>         | <ul style="list-style-type: none"> <li>ADR Monitoring practice (C)</li> </ul>                                                                                                 |
| Kinsman, 2021, Australia          | <ul style="list-style-type: none"> <li>None</li> </ul>                                | <ul style="list-style-type: none"> <li>N/A</li> </ul>                                                                                                                         |
| Koh, 2009, Singapore              | <ul style="list-style-type: none"> <li>CP - Assessment/examination</li> </ul>         | <ul style="list-style-type: none"> <li>Fall risk assessment (D)</li> </ul>                                                                                                    |
| Köpke, 2012, Germany              | <ul style="list-style-type: none"> <li>CP – Physical restraint</li> </ul>             | <ul style="list-style-type: none"> <li>Prevalence of Physical Restraint Use - Any physical restraint (D)</li> </ul>                                                           |
| Kroth, 2006, USA                  | <ul style="list-style-type: none"> <li>CP - Assessment/examination</li> </ul>         | <ul style="list-style-type: none"> <li>Temperatures at impossible levels (D)</li> </ul>                                                                                       |
| Kyriacos, 2015, South Africa      | <ul style="list-style-type: none"> <li>CP - Documentation</li> </ul>                  | <ul style="list-style-type: none"> <li>MEWS trigger reported (D)</li> </ul>                                                                                                   |
| Kyriacos, 2019, South Africa      | <ul style="list-style-type: none"> <li>CP - Assessment/examination</li> </ul>         | <ul style="list-style-type: none"> <li>Vitals signs (RR recorded) (D)</li> </ul>                                                                                              |
| Lacko, 1999, USA                  | <ul style="list-style-type: none"> <li>CP – Assessment/examination</li> </ul>         | <ul style="list-style-type: none"> <li>Nurse ability to identify delirium (D)</li> </ul>                                                                                      |
| Lau, 2017, USA                    | <ul style="list-style-type: none"> <li>None</li> </ul>                                | <ul style="list-style-type: none"> <li>N/A</li> </ul>                                                                                                                         |
| Lee, 2015, South Korea            | <ul style="list-style-type: none"> <li>CP - Equipment management</li> </ul>           | <ul style="list-style-type: none"> <li>Rate of poor preparation (OBPS &gt; 6) (D)</li> </ul>                                                                                  |
| Lim, 2020, Malaysia               | <ul style="list-style-type: none"> <li>None</li> </ul>                                | <ul style="list-style-type: none"> <li>N/A</li> </ul>                                                                                                                         |
| Lin, 2008, Taiwan                 | <ul style="list-style-type: none"> <li>None</li> </ul>                                | <ul style="list-style-type: none"> <li>N/A</li> </ul>                                                                                                                         |
| Liu, 2010, Taiwan                 | <ul style="list-style-type: none"> <li>CP - Care coordination</li> </ul>              | <ul style="list-style-type: none"> <li>Frequency of using skills in case management (C)</li> </ul>                                                                            |
| Liu, 2020, China                  | <ul style="list-style-type: none"> <li>CP - Equipment management</li> </ul>           | <ul style="list-style-type: none"> <li>Bowel preparation (C)</li> </ul>                                                                                                       |
| Locke, 2011, USA                  | <ul style="list-style-type: none"> <li>CP - Testing/screening</li> </ul>              | <ul style="list-style-type: none"> <li>Obtaining Capillary Blood Glucose in 14 minutes or less (D)</li> </ul>                                                                 |
| Lundgren, 1999, Sweden            | <ul style="list-style-type: none"> <li>CP - Equipment management</li> </ul>           | <ul style="list-style-type: none"> <li>Satisfactory care and handling of the peripheral intravenous vein cannulae by nurses (D)</li> </ul>                                    |
| Magill, 2018, UK                  | <ul style="list-style-type: none"> <li>CP - Counseling/provision of advice</li> </ul> | <ul style="list-style-type: none"> <li>BECCI Practitioner Score (C)</li> </ul>                                                                                                |
| Magnan, 2008, USA                 | <ul style="list-style-type: none"> <li>None</li> </ul>                                | <ul style="list-style-type: none"> <li>N/A</li> </ul>                                                                                                                         |
| Mäki-Turja-Rostedt, 2020, Finland | <ul style="list-style-type: none"> <li>CP - Assessment/examination</li> </ul>         | <ul style="list-style-type: none"> <li>Risk assessment (C)</li> </ul>                                                                                                         |
| Mancheril, 2021, USA              | <ul style="list-style-type: none"> <li>CP - Assessment/examination</li> </ul>         | <ul style="list-style-type: none"> <li>RASS score (D)</li> </ul>                                                                                                              |
| Manias, 2011, Australia           | <ul style="list-style-type: none"> <li>CP - Assessment/examination</li> </ul>         | <ul style="list-style-type: none"> <li>Nurses' Uptake of Pain Assessment Tools (D)</li> </ul>                                                                                 |
| Marcantonio, 2010, USA            | <ul style="list-style-type: none"> <li>CP - Assessment/examination</li> </ul>         | <ul style="list-style-type: none"> <li>Nurses detection of delirium (D)</li> </ul>                                                                                            |
| Maruyama, 2022, Japan             | <ul style="list-style-type: none"> <li>CP – Counseling/Provision of advice</li> </ul> | <ul style="list-style-type: none"> <li>Types of practiced preparatory/reinforcing behaviors (C)</li> </ul>                                                                    |
| Mazzuca, 1987, USA                | <ul style="list-style-type: none"> <li>CP - Assessment/examination</li> </ul>         | <ul style="list-style-type: none"> <li>Percentage of clients who were screening for joint pain by nurses (D)</li> </ul>                                                       |
| McDonald, 2005, USA               | <ul style="list-style-type: none"> <li>CP – Assessment/examination</li> </ul>         | <ul style="list-style-type: none"> <li>Presence of pain (D)</li> </ul>                                                                                                        |
| Memon, 2022, Pakistan             | <ul style="list-style-type: none"> <li>CP - Assessment/examination</li> </ul>         | <ul style="list-style-type: none"> <li>Practice score of AMTSL (C)</li> </ul>                                                                                                 |
| Meyer, 2001, South Africa         | <ul style="list-style-type: none"> <li>CP - Prescription</li> </ul>                   | <ul style="list-style-type: none"> <li>Average no. of items per prescription for upper respiratory tract infection (C)</li> </ul>                                             |
| Meyer, 2003, Germany              | <ul style="list-style-type: none"> <li>CP - Equipment Management</li> </ul>           | <ul style="list-style-type: none"> <li>% Residents who used hip protector (D)</li> </ul>                                                                                      |
| Michaels, 2007, USA               | <ul style="list-style-type: none"> <li>None</li> </ul>                                | <ul style="list-style-type: none"> <li>N/A</li> </ul>                                                                                                                         |
| Middleton, 2011, Australia        | <ul style="list-style-type: none"> <li>CP - Assessment/examination</li> </ul>         | <ul style="list-style-type: none"> <li>Swallowing screening within 24 h of admission to ASU (excluding those who had screens in ED) (D)</li> </ul>                            |
| Morita, 2009, Japan               | <ul style="list-style-type: none"> <li>None</li> </ul>                                | <ul style="list-style-type: none"> <li>N/A</li> </ul>                                                                                                                         |
| Morita, 2014, Japan               | <ul style="list-style-type: none"> <li>CP - Counseling/provision of advice</li> </ul> | <ul style="list-style-type: none"> <li>Self-reported adherence to recommended clinical practice in helping terminally ill patients find meaning in their lives (C)</li> </ul> |
| Mousavi, 2022, Iran               | <ul style="list-style-type: none"> <li>CP - Equipment Management</li> </ul>           | <ul style="list-style-type: none"> <li>Practice (C)</li> </ul>                                                                                                                |
| Muller-Staub, 2008, Switzerland   | <ul style="list-style-type: none"> <li>None</li> </ul>                                | <ul style="list-style-type: none"> <li>N/A</li> </ul>                                                                                                                         |
| Murtaugh, 2005, USA               | <ul style="list-style-type: none"> <li>CP - Assessment/examination</li> </ul>         | <ul style="list-style-type: none"> <li>Comprehensive HF assessment (D)</li> </ul>                                                                                             |
| Nakatani, 2012, Japan             | <ul style="list-style-type: none"> <li>CP - Counseling/provision of advice</li> </ul> | <ul style="list-style-type: none"> <li>Implementation of health education, Fall prevention, For elderly subjects with a history of falls (D)</li> </ul>                       |
| Nemati, 2022, Iran                | <ul style="list-style-type: none"> <li>CP – Care coordination</li> </ul>              | <ul style="list-style-type: none"> <li>Quality of handoff (C)</li> </ul>                                                                                                      |
| Noome, 2017, Netherlands          | <ul style="list-style-type: none"> <li>CP - Assessment/examination</li> </ul>         | <ul style="list-style-type: none"> <li>The ICU nurse assessed the physical needs of the patient (C)</li> </ul>                                                                |
| Noordman, 2014, Netherlands       | <ul style="list-style-type: none"> <li>None</li> </ul>                                | <ul style="list-style-type: none"> <li>N/A</li> </ul>                                                                                                                         |

## Additional file 7. Clinical practice outcomes included in the meta-analyses.

|                                |                                                                                       |                                                                                                                                                                                                             |
|--------------------------------|---------------------------------------------------------------------------------------|-------------------------------------------------------------------------------------------------------------------------------------------------------------------------------------------------------------|
| Nowalk, 2005, USA              | <ul style="list-style-type: none"> <li>CP - Immunization</li> </ul>                   | <ul style="list-style-type: none"> <li>Received First Dose of influenza shot (D)</li> </ul>                                                                                                                 |
| O'Neil, 2016, USA              | <ul style="list-style-type: none"> <li>CP - Infection control</li> </ul>              | <ul style="list-style-type: none"> <li>100% compliance on dressing quality measures (D)</li> </ul>                                                                                                          |
| O'Neill, 1999, Canada          | <ul style="list-style-type: none"> <li>None</li> </ul>                                | <ul style="list-style-type: none"> <li>N/A</li> </ul>                                                                                                                                                       |
| Ogden, 1997, UK                | <ul style="list-style-type: none"> <li>CP - Counseling/provision of advice</li> </ul> | <ul style="list-style-type: none"> <li>Practice nurses' current practices in obesity management - frequency of advice giving per week (C)</li> </ul>                                                        |
| Omidi, 2020, Iran              | <ul style="list-style-type: none"> <li>CP - Symptom management</li> </ul>             | <ul style="list-style-type: none"> <li>Nurses' behavior (End of Life Care) (C)</li> </ul>                                                                                                                   |
| Oniki, 2003, USA               | <ul style="list-style-type: none"> <li>CP – Documentation</li> </ul>                  | <ul style="list-style-type: none"> <li>Average numbers of charting deficiencies at the end of the shift per Day per Patients (C)</li> </ul>                                                                 |
| Pagaiya, 2005, Thailand        | <ul style="list-style-type: none"> <li>None</li> </ul>                                | <ul style="list-style-type: none"> <li>N/A</li> </ul>                                                                                                                                                       |
| Park, 2021, South Korea        | <ul style="list-style-type: none"> <li>CP – Care coordination</li> </ul>              | <ul style="list-style-type: none"> <li>Fall prevention behavior (C)</li> </ul>                                                                                                                              |
| Parker, 2013, USA              | <ul style="list-style-type: none"> <li>CP - Counseling/provision of advice</li> </ul> | <ul style="list-style-type: none"> <li>Patients with whom a conversation about CAM was initiated (D)</li> </ul>                                                                                             |
| Passos, 2022, Brazil           | <ul style="list-style-type: none"> <li>CP - Infection control</li> </ul>              | <ul style="list-style-type: none"> <li>Total Module B (C)</li> </ul>                                                                                                                                        |
| Pauwels, 2018, Indonesia       | <ul style="list-style-type: none"> <li>CP - Assessment/examination</li> </ul>         | <ul style="list-style-type: none"> <li>Cases correctly diagnosed / triaged by nurses (D)</li> </ul>                                                                                                         |
| Pitkälä, 2014, Finland         | <ul style="list-style-type: none"> <li>CP - Medication administration</li> </ul>      | <ul style="list-style-type: none"> <li>Number of harmful medications (D)</li> </ul>                                                                                                                         |
| Quintard, 2010, France         | <ul style="list-style-type: none"> <li>CP - Infection control</li> </ul>              | <ul style="list-style-type: none"> <li>Nurses auto-evaluation of nosocomial infection prevention practices (C)</li> </ul>                                                                                   |
| Rankin, 2013, Canada           | <ul style="list-style-type: none"> <li>CP - Assessment/examination</li> </ul>         | <ul style="list-style-type: none"> <li>Triage Accuracy (charts audited by a CTAS expert/ provincial auditor for triage evaluation) (D)</li> </ul>                                                           |
| Rantz, 2001, USA               | <ul style="list-style-type: none"> <li>CP - Medication administration</li> </ul>      | <ul style="list-style-type: none"> <li>Scores for the Minimum Data Set Quality indicator #6 (use of 9 or more different medications per residents) - Primary analyses (C)</li> </ul>                        |
| Reynolds, 2021, USA            | <ul style="list-style-type: none"> <li>None</li> </ul>                                | <ul style="list-style-type: none"> <li>N/A</li> </ul>                                                                                                                                                       |
| Rhew, 1999, USA                | <ul style="list-style-type: none"> <li>CP - Immunization</li> </ul>                   | <ul style="list-style-type: none"> <li>Total vaccines given by team (D)</li> </ul>                                                                                                                          |
| Roelands, 2004, Belgium        | <ul style="list-style-type: none"> <li>CP - Counseling/provision of advice</li> </ul> | <ul style="list-style-type: none"> <li>Self-reported practice regarding introducing ADs in home nurses: Number of intervention methods applied for nurses (C)</li> </ul>                                    |
| Rothschild, 2005, USA          | <ul style="list-style-type: none"> <li>None</li> </ul>                                | <ul style="list-style-type: none"> <li>N/A</li> </ul>                                                                                                                                                       |
| Rutherford-Hemming, 2016, USA  | <ul style="list-style-type: none"> <li>None</li> </ul>                                | <ul style="list-style-type: none"> <li>N/A</li> </ul>                                                                                                                                                       |
| Sadeghi, 2018, Iran            | <ul style="list-style-type: none"> <li>CP - Infection control</li> </ul>              | <ul style="list-style-type: none"> <li>Practice score regarding standard precautions (C)</li> </ul>                                                                                                         |
| Sævareid, 2019, Norway         | <ul style="list-style-type: none"> <li>CP - Counseling/provision of advice</li> </ul> | <ul style="list-style-type: none"> <li>Patients who participated in a conversation on end-of-life treatment (D)</li> </ul>                                                                                  |
| Sarna, 2012, USA               | <ul style="list-style-type: none"> <li>CP – Care coordination</li> </ul>              | <ul style="list-style-type: none"> <li>Differences in Frequency of Smoking Cessation Interventions According to Referral to a Quitline: Baseline and 6-Month Mean Scores by Group Assignment (C)</li> </ul> |
| Sayre, 2012, USA               | <ul style="list-style-type: none"> <li>CP - Care coordination</li> </ul>              | <ul style="list-style-type: none"> <li>Speaking-up scores/measures from baseline to posttest (C)</li> </ul>                                                                                                 |
| Schneider, 2006, Netherlands   | <ul style="list-style-type: none"> <li>CP - Medication administration</li> </ul>      | <ul style="list-style-type: none"> <li>% Medication-Error (S.D.) (Individual Nurse Medication-Error Rate) (D)</li> </ul>                                                                                    |
| Schondelmeyer, 2021, USA       | <ul style="list-style-type: none"> <li>None</li> </ul>                                | <ul style="list-style-type: none"> <li>N/A</li> </ul>                                                                                                                                                       |
| Seeley, 2008, Sri Lanka        | <ul style="list-style-type: none"> <li>None</li> </ul>                                | <ul style="list-style-type: none"> <li>N/A</li> </ul>                                                                                                                                                       |
| Segal, 2015, UK                | <ul style="list-style-type: none"> <li>None</li> </ul>                                | <ul style="list-style-type: none"> <li>N/A</li> </ul>                                                                                                                                                       |
| Senarath, 2017, Israel         | <ul style="list-style-type: none"> <li>CP - Infection control</li> </ul>              | <ul style="list-style-type: none"> <li>Handwashing before delivery (D)</li> </ul>                                                                                                                           |
| Seo, 2020, South Korea         | <ul style="list-style-type: none"> <li>CP - Care coordination</li> </ul>              | <ul style="list-style-type: none"> <li>Behaviors (C)</li> </ul>                                                                                                                                             |
| Seto, 1989, Hong Kong          | <ul style="list-style-type: none"> <li>CP - Infection control</li> </ul>              | <ul style="list-style-type: none"> <li>Discontinuation of recapping needles (D)</li> </ul>                                                                                                                  |
| Seto, 1991, Hong Kong          | <ul style="list-style-type: none"> <li>CP - Infection control</li> </ul>              | <ul style="list-style-type: none"> <li>Direct observation: Correct practice (D)</li> </ul>                                                                                                                  |
| Shevlin, 2002, USA             | <ul style="list-style-type: none"> <li>CP - Immunization</li> </ul>                   | <ul style="list-style-type: none"> <li>Vaccination rate (D)</li> </ul>                                                                                                                                      |
| Smeland, 2022, Norway          | <ul style="list-style-type: none"> <li>CP - Assessment/examination</li> </ul>         | <ul style="list-style-type: none"> <li>Use of Pain Assessment Tool – Total (D)</li> </ul>                                                                                                                   |
| Snelgrove-Clarke, 2015, Canada | <ul style="list-style-type: none"> <li>CP - Assessment/examination</li> </ul>         | <ul style="list-style-type: none"> <li>Nurses' Use of Guideline Appropriate Care During an Episode of Care (D)</li> </ul>                                                                                   |
| Srikrajang, 2005, Thailand     | <ul style="list-style-type: none"> <li>CP - Medication administration</li> </ul>      | <ul style="list-style-type: none"> <li>Appropriate administration of medication to IV fluid (D)</li> </ul>                                                                                                  |
| Sung, 2008, South Korea        | <ul style="list-style-type: none"> <li>CP - Medication administration</li> </ul>      | <ul style="list-style-type: none"> <li>Medication-administration ability (C)</li> </ul>                                                                                                                     |
| Teasing, 2020, Netherlands     | <ul style="list-style-type: none"> <li>CP - Infection control</li> </ul>              | <ul style="list-style-type: none"> <li>Hand Hygiene Compliance (D)</li> </ul>                                                                                                                               |
| Teresi, 2013, USA              | <ul style="list-style-type: none"> <li>CP - Incident reporting</li> </ul>             | <ul style="list-style-type: none"> <li>Staff reported number of incidents (C)</li> </ul>                                                                                                                    |
| Titler, 2009, USA              | <ul style="list-style-type: none"> <li>CP - Medication administration</li> </ul>      | <ul style="list-style-type: none"> <li>Around-the-clock administration of an opioid (D)</li> </ul>                                                                                                          |
| Tornvall, 2009, Sweden         | <ul style="list-style-type: none"> <li>CP - Documentation</li> </ul>                  | <ul style="list-style-type: none"> <li>Patients health history (D)</li> </ul>                                                                                                                               |

## Additional file 7. Clinical practice outcomes included in the meta-analyses.

|                                 |                                                                                       |                                                                                                                                       |
|---------------------------------|---------------------------------------------------------------------------------------|---------------------------------------------------------------------------------------------------------------------------------------|
| Tsai, 2011a, Taiwan             | <ul style="list-style-type: none"> <li>CP - Counseling/provision of advice</li> </ul> | <ul style="list-style-type: none"> <li>Clinical practice (C)</li> </ul>                                                               |
| Tsai, 2011b, Taiwan             | <ul style="list-style-type: none"> <li>None</li> </ul>                                | <ul style="list-style-type: none"> <li>N/A</li> </ul>                                                                                 |
| Välimäki, 2022, Finland         | <ul style="list-style-type: none"> <li>CP – Physical restraints</li> </ul>            | <ul style="list-style-type: none"> <li>No. of seclusion events (D)</li> </ul>                                                         |
| van de Steeg, 2014, Netherlands | <ul style="list-style-type: none"> <li>None</li> </ul>                                | <ul style="list-style-type: none"> <li>N/A</li> </ul>                                                                                 |
| van Gaal, 2011a, Netherlands    | <ul style="list-style-type: none"> <li>CP - Infection control</li> </ul>              | <ul style="list-style-type: none"> <li>Hospitals: Nurses hand hygiene (D)</li> <li>Nursing homes: Nurses' hand hygiene (D)</li> </ul> |
| van Gaal, 2011b, Netherlands    | <ul style="list-style-type: none"> <li>CP - Infection control</li> </ul>              | <ul style="list-style-type: none"> <li>Hospitals: Nurses hand hygiene (D)</li> <li>Nursing homes: Nurses' hand hygiene (D)</li> </ul> |
| van Lieshout, 2015, Netherlands | <ul style="list-style-type: none"> <li>CP - Counseling/provision of advice</li> </ul> | <ul style="list-style-type: none"> <li>Number of patients who received recommended counselling (D)</li> </ul>                         |
| Varghese, 2014, India           | <ul style="list-style-type: none"> <li>CP - Assessment/examination</li> </ul>         | <ul style="list-style-type: none"> <li>Assessment (C)</li> </ul>                                                                      |
| Vicdan, 2019, Turkey            | <ul style="list-style-type: none"> <li>CP - Medication administration</li> </ul>      | <ul style="list-style-type: none"> <li>Use of ventrogluteal site for injection (D)</li> </ul>                                         |
| von Lengerke, 2017, Germany     | <ul style="list-style-type: none"> <li>CP - Infection control</li> </ul>              | <ul style="list-style-type: none"> <li>Nurses - Hand washing compliance rate (D)</li> </ul>                                           |
| Wagner, 2005, Canada            | <ul style="list-style-type: none"> <li>CP - Documentation</li> </ul>                  | <ul style="list-style-type: none"> <li>Near fall documentation (D)</li> </ul>                                                         |
| Wald, 2014, USA                 | <ul style="list-style-type: none"> <li>None</li> </ul>                                | <ul style="list-style-type: none"> <li>N/A</li> </ul>                                                                                 |
| Walsh, 2016, UK                 | <ul style="list-style-type: none"> <li>None</li> </ul>                                | <ul style="list-style-type: none"> <li>N/A</li> </ul>                                                                                 |
| Wang, 2020, China               | <ul style="list-style-type: none"> <li>None</li> </ul>                                | <ul style="list-style-type: none"> <li>N/A</li> </ul>                                                                                 |
| Wang, 2022, China               | <ul style="list-style-type: none"> <li>None</li> </ul>                                | <ul style="list-style-type: none"> <li>N/A</li> </ul>                                                                                 |
| Weaver, 2016, South Africa      | <ul style="list-style-type: none"> <li>CP – Testing/Screening</li> </ul>              | <ul style="list-style-type: none"> <li>Sexually transmitted infection (STI) tasks completed (D)</li> </ul>                            |
| Westbrook, 2017, Australia      | <ul style="list-style-type: none"> <li>CP - Care coordination</li> </ul>              | <ul style="list-style-type: none"> <li>Rate (no) of total interruptions per 100 administrations (D)</li> </ul>                        |
| Wilkinson, 2008, UK             | <ul style="list-style-type: none"> <li>CP - Counseling/provision of advice</li> </ul> | <ul style="list-style-type: none"> <li>Communication skills (C)</li> </ul>                                                            |
| Wood, 2021, Australia           | <ul style="list-style-type: none"> <li>CP – Testing/Screening</li> </ul>              | <ul style="list-style-type: none"> <li>Chlamydia testing rates (D)</li> </ul>                                                         |
| Woodcock, 1999, UK              | <ul style="list-style-type: none"> <li>None</li> </ul>                                | <ul style="list-style-type: none"> <li>N/A</li> </ul>                                                                                 |
| Wright, 1997, USA               | <ul style="list-style-type: none"> <li>CP – Infection control</li> </ul>              | <ul style="list-style-type: none"> <li>Universal precautions-related behaviors (C)</li> </ul>                                         |
| Yang, 2019, Taiwan              | <ul style="list-style-type: none"> <li>CP - Assessment/examination</li> </ul>         | <ul style="list-style-type: none"> <li>NGT care procedure (C)</li> </ul>                                                              |
| Yun, 2022, Korea                | <ul style="list-style-type: none"> <li>CP – Assessment/examination</li> </ul>         | <ul style="list-style-type: none"> <li>DP Performance (C)</li> </ul>                                                                  |
| Zarifsanaiey, 2022, Iran        | <ul style="list-style-type: none"> <li>CP – Testing/Screening</li> </ul>              | <ul style="list-style-type: none"> <li>Behaviour (C)</li> </ul>                                                                       |
| Ziyaeifard, 2018, Iran          | <ul style="list-style-type: none"> <li>CP - Medication administration</li> </ul>      | <ul style="list-style-type: none"> <li>Morphine administration (D)</li> </ul>                                                         |
| Zohar, 2017, Israel             | <ul style="list-style-type: none"> <li>CP - Counseling/provision of advice</li> </ul> | <ul style="list-style-type: none"> <li>Nursing care behaviours (Patient caring) (C)</li> </ul>                                        |
