# Supplementary material for: Effects of implementation strategies on nursing practice and patient outcomes: a comprehensive systematic review and meta-analysis
Source: PubMed Central journal article supplement — Implement Sci. 2024 Sep 30;19:68. doi: 10.1186/s13012-024-01398-0 (PMC11443951; doi:10.1186/s13012-024-01398-0), 2024-09-30
Supplement: 13012_2024_1398_MOESM8_ESM.pdf [file 13012_2024_1398_MOESM8_ESM.pdf]

**Additional file 8. Sensitivity analyses for primary outcome (compliance with desired clinical practice).**

|                                                                                                                                        |                                           |                                          | All studies included <sup>1</sup>             |                                                      | Low risk of bias only <sup>1</sup>            |                                                       |                                                 |
|----------------------------------------------------------------------------------------------------------------------------------------|-------------------------------------------|------------------------------------------|-----------------------------------------------|------------------------------------------------------|-----------------------------------------------|-------------------------------------------------------|-------------------------------------------------|
| Categories                                                                                                                             | Statistical Method                        | Outcomes                                 | Number of studies<br>(Number of participants) | Effect estimate                                      | Number of studies<br>(Number of participants) | Effect estimate                                       | Interpretations                                 |
| <b>Any implementation intervention vs. No intervention</b>                                                                             | Std. Mean Difference (IV, Random, 95% CI) | Clinical practice (continuous outcomes)  | 70 (8 513)                                    | <b>0.94*</b><br>[0.72, 1.15]<br>I <sup>2</sup> = 95% | 13 (1 925)                                    | <b>0.56*</b><br>[0.29, 0.83]<br>I <sup>2</sup> = 86%  | Effect size reduced; heterogeneity reduced.     |
|                                                                                                                                        | Odds Ratio (IV, Random, 95% CI)           | Clinical practice (dichotomous outcomes) | 57 (291 156)                                  | <b>2.11*</b><br>[1.70, 2.62]<br>I <sup>2</sup> = 95% | 29 (177 165)                                  | <b>2.00*</b><br>[1.49, 2.68]<br>I <sup>2</sup> = 96%  | Effect size reduced; heterogeneity unchanged.   |
| <b>Multifaceted implementation strategy vs. Single-component strategy</b>                                                              | Std. Mean Difference (IV, Random, 95% CI) | Clinical practice (continuous outcomes)  | 12 (1 614)                                    | 0.23<br>[-0.01, 0.46]<br>I <sup>2</sup> = 77%        | Insufficient data                             | Insufficient data                                     | N/A                                             |
|                                                                                                                                        | Odds Ratio (IV, Random, 95% CI)           | Clinical practice (dichotomous outcomes) | 14 (3 801)                                    | 1.35<br>[0.76, 2.40]<br>I <sup>2</sup> = 91%         | 9 (3 195)                                     | 1.77<br>[0.89, 3.51]<br>I <sup>2</sup> = 92%          | Effect size increased; heterogeneity unchanged. |
| <b>Strategies including Individual Clinician Education (ICE) as compared to no intervention or strategies that did not involve ICE</b> | Std. Mean Difference (IV, Random, 95% CI) | Clinical practice (continuous outcomes)  | 62 (6 689)                                    | <b>0.82*</b><br>[0.60, 1.03]<br>I <sup>2</sup> = 94% | 11 (1 615)                                    | <b>0.45*</b><br>[0.22, 0.68]<br>I <sup>2</sup> = 75%  | Effect size reduced; heterogeneity reduced.     |
|                                                                                                                                        | Odds Ratio (IV, Random, 95% CI)           | Clinical practice (dichotomous outcomes) | 53 (204 925)                                  | <b>2.04*</b><br>[1.62, 2.56]<br>I <sup>2</sup> = 96% | 27 (185 088)                                  | <b>1.82*</b><br>[1.38, 2.342]<br>I <sup>2</sup> = 96% | Effect size reduced; heterogeneity unchanged.   |
| <b>Strategies including Group Clinician Education (GCE) as compared to no intervention or strategies that did not involve GCE</b>      | Std. Mean Difference (IV, Random, 95% CI) | Clinical practice (continuous outcomes)  | 68 (8 125)                                    | <b>0.96*</b><br>[0.73, 1.19]<br>I <sup>2</sup> = 95% | 12 (1 180)                                    | <b>0.69*</b><br>[0.42, 0.95]<br>I <sup>2</sup> = 76%  | Effect size reduced; heterogeneity reduced.     |
|                                                                                                                                        | Odds Ratio (M-H, Random, 95% CI)          | Clinical practice (dichotomous outcomes) | 55 (219 445)                                  | <b>1.81*</b><br>[1.50, 2.19]<br>I <sup>2</sup> = 94% | 25 (105 166)                                  | <b>1.94*</b><br>[1.47, 2.54]<br>I <sup>2</sup> = 90%  | Effect size increased; heterogeneity reduced.   |
| <b>Strategies including Reminders as compared to no intervention or strategies that did not involve reminders</b>                      | Std. Mean Difference (IV, Random, 95% CI) | Clinical practice (continuous outcomes)  | 11 (802)                                      | 0.61<br>[-0.11, 1.33]<br>I <sup>2</sup> = 95%        | 2 (49)                                        | 0.45<br>[-0.19, 1.09]<br>I <sup>2</sup> = 20%         | Effect size increased; heterogeneity reduced.   |

**Additional file 8. Sensitivity analyses for primary outcome (compliance with desired clinical practice).**

|                                                                                                                                       |                                           |                                          |              |                                                      |                   |                                                      |                                                                       |
|---------------------------------------------------------------------------------------------------------------------------------------|-------------------------------------------|------------------------------------------|--------------|------------------------------------------------------|-------------------|------------------------------------------------------|-----------------------------------------------------------------------|
|                                                                                                                                       | Odds Ratio (IV, Random, 95% CI)           | Clinical practice (dichotomous outcomes) | 23 (113 863) | <b>2.44*</b><br>[1.89, 3.17]<br>I <sup>2</sup> = 90% | 15 (108 917)      | <b>2.20*</b><br>[1.64, 2.96]<br>I <sup>2</sup> = 91% | Effect size reduced; heterogeneity unchanged.                         |
| <b>Strategies including Patient-Mediated Intervention (PMI) as compared to no intervention or strategies that did not involve PMI</b> | Odds Ratio (IV, Random, 95% CI)           | Clinical practice (dichotomous outcomes) | 8 (12 289)   | <b>1.78*</b><br>[1.13, 2.79]<br>I <sup>2</sup> = 95% | 4 (6 610)         | <b>1.73*</b><br>[1.27, 2.36]<br>I <sup>2</sup> = 85% | Effect size unchanged; heterogeneity reduced.                         |
| <b>Strategies including Audit and Feedback (A&amp;F) as compared to no intervention or strategies that did not involve A&amp;F</b>    | Std. Mean Difference (IV, Random, 95% CI) | Clinical practice (continuous outcomes)  | 7 (828)      | -0.18<br>[-0.60, 0.24]<br>I <sup>2</sup> = 86%       | 2 (190)           | <b>0.31*</b><br>[0.02, 0.59]<br>I <sup>2</sup> = 0%  | Effect size changed from negative to positive; heterogeneity reduced. |
|                                                                                                                                       | Odds Ratio (IV, Random, 95% CI)           | Clinical practice (dichotomous outcomes) | 17 (183 795) | 1.42<br>[0.94, 2.13]<br>I <sup>2</sup> = 98%         | 8 (75 661)        | 1.06<br>[0.49, 2.28]<br>I <sup>2</sup> = 98%         | Effect size reduced.                                                  |
| <b>Strategies including Tailored Intervention (TI) as compared to no intervention or strategies that did not involve TI</b>           | Std. Mean Difference (IV, Random, 95% CI) | Clinical practice (continuous outcomes)  | 9 (1 262)    | <b>1.41*</b><br>[0.65, 2.17]<br>I <sup>2</sup> = 97% | Insufficient data | Insufficient data                                    |                                                                       |
|                                                                                                                                       | Odds Ratio (IV, Random, 95% CI)           | Clinical practice (dichotomous outcomes) | 14 (98 342)  | <b>1.90*</b><br>[1.23, 2.93]<br>I <sup>2</sup> = 99% | 10 (90 754)       | <b>1.86*</b><br>[1.13, 3.05]<br>I <sup>2</sup> = 99% | Effect size reduced; heterogeneity unchanged.                         |
| <b>Strategies including Opinion Leaders (OLs) as compared to no intervention or strategies that did not involve OLs</b>               | Std. Mean Difference (IV, Random, 95% CI) | Clinical practice (continuous outcomes)  | 4 (588)      | 0.41<br>[-0.10, 0.93]<br>I <sup>2</sup> = 85%        | Insufficient data | Insufficient data                                    |                                                                       |
|                                                                                                                                       | Odds Ratio (IV, Random, 95% CI)           | Clinical practice (dichotomous outcomes) | 13 (91 936)  | <b>1.96*</b><br>[1.22, 3.14]<br>I <sup>2</sup> = 98% | 10 (87 332)       | <b>1.84*</b><br>[1.09, 3.12]<br>I <sup>2</sup> = 99% | Effect size reduced; heterogeneity unchanged.                         |

1. A \* denotes a statistically significant result (i.e., two-sided p value of less than 0.05).
