# Supplementary material for: Effects of implementation strategies on nursing practice and patient outcomes: a comprehensive systematic review and meta-analysis
Source: PubMed Central journal article supplement — Implement Sci. 2024 Sep 30;19:68. doi: 10.1186/s13012-024-01398-0 (PMC11443951; doi:10.1186/s13012-024-01398-0), 2024-09-30
Supplement: 13012_2024_1398_MOESM10_ESM.pdf [file 13012_2024_1398_MOESM10_ESM.pdf]

## Additional file 10. Summary of findings tables: Effects of implementation strategies on nursing practice and patient outcomes

**Table S10-1. Summary of findings: Effects of implementation strategies on compliance with desired clinical practice in healthcare professionals (primary outcome) and patient outcomes (secondary outcomes).**

| Population: Healthcare professionals (≥90% nurses) and patients |                                 |                         |                                                                                                                                                                                  |                                 |                                                                                                                                                                                                                                                                                                                                                                                      |
|-----------------------------------------------------------------|---------------------------------|-------------------------|----------------------------------------------------------------------------------------------------------------------------------------------------------------------------------|---------------------------------|--------------------------------------------------------------------------------------------------------------------------------------------------------------------------------------------------------------------------------------------------------------------------------------------------------------------------------------------------------------------------------------|
| Comparison                                                      | Outcomes                        | Effect size (95%CI)     | Number of patients, healthcare professionals and studies                                                                                                                         | Quality of the evidence (GRADE) | Comments                                                                                                                                                                                                                                                                                                                                                                             |
| Any implementation strategy vs None                             | Clinical Practice (Continuous)  | SMD: 0.94 (0.72, 1.15)  | 70 studies<br>76 assessments<br>109 106 patients from 20 studies<br>6 964 healthcare professionals from 61 studies<br>796 clusters of healthcare professionals for 30 studies    | ⊕⊕⊕⊖<br><b>Moderate</b>         | <ul style="list-style-type: none"> <li>Overall risk of bias was deemed very serious (13 low risk of bias studies out of 70)</li> <li>26 cluster randomized trials (CRTs), 23 randomized controlled trials (RCTs) and 21 non-randomized controlled studies (NRCS)</li> <li>Inconsistency, indirectness, and imprecision were deemed not serious</li> <li>Large effect size</li> </ul> |
| Any implementation strategy vs None                             | Clinical Practice (Dichotomous) | OR: 1.99 (1.68, 2.37)   | 57 studies<br>60 assessments<br>118 152 patients from 51 studies<br>13 530 healthcare professionals from 53 studies<br>1 024 clusters of healthcare professionals for 52 studies | ⊕⊕⊕⊖<br><b>Moderate</b>         | <ul style="list-style-type: none"> <li>Overall risk of bias was deemed serious (29 low risk of bias studies out of 57)</li> <li>37 CRTs, 9 RCTs, and 11 NRCS</li> <li>Inconsistency was deemed serious while indirectness and imprecision were deemed not serious</li> <li>Moderate effect size</li> </ul>                                                                           |
| Any implementation strategy vs None                             | Patient Outcome (Continuous)    | SMD: 0.23 (-0.01, 0.47) | 10 assessments<br>10 studies<br>108 125 patients from 10 studies<br>963 healthcare professionals from 8 studies<br>188 clusters of healthcare professionals for 7 studies        | ⊕⊕⊕⊖<br><b>Low</b>              | <ul style="list-style-type: none"> <li>Overall risk of bias was deemed serious (4 low risk of bias studies out of 10)</li> <li>6 CRTs, 2 RCTs, and 2 NRCS</li> <li>Inconsistency was deemed serious while indirectness and imprecision were deemed not serious</li> </ul>                                                                                                            |
| Any implementation strategy vs None                             | Patient Outcome (Dichotomous)   | OR: 1.46 (0.96, 2.22)   | 12 studies<br>12 assessments<br>23 818 patients from 11 studies<br>1 522 healthcare professionals from 7 studies<br>154 clusters of healthcare professionals for 9 studies       | ⊕⊕⊕⊖<br><b>Low</b>              | <ul style="list-style-type: none"> <li>Overall risk of bias was deemed serious (4 low risk of bias studies out of 12)</li> <li>7 CRTs, 2 RCTs, and 3 NRCS</li> <li>Inconsistency was deemed serious while imprecision was considered very serious, indirectness was deemed not serious</li> </ul>                                                                                    |
| Multifaceted vs Single component                                | Clinical Practice (Continuous)  | SMD: 0.23 (-0.01, 0.46) | 12 assessments<br>12 studies                                                                                                                                                     | ⊕⊕⊕⊖<br><b>Low</b>              | <ul style="list-style-type: none"> <li>Overall risk of bias was deemed very serious (1 low risk of bias studies out of 12)</li> </ul>                                                                                                                                                                                                                                                |

## Additional file 10. Summary of findings tables: Effects of implementation strategies on nursing practice and patient outcomes

|                                           |                                 |                              |                                                                                                                                                                                  |                         |                                                                                                                                                                                                                                                                                                                |
|-------------------------------------------|---------------------------------|------------------------------|----------------------------------------------------------------------------------------------------------------------------------------------------------------------------------|-------------------------|----------------------------------------------------------------------------------------------------------------------------------------------------------------------------------------------------------------------------------------------------------------------------------------------------------------|
|                                           |                                 |                              | 62 945 patients from 5 studies<br>2 699 healthcare professionals from 11 studies<br>219 clusters of healthcare professionals for 4 studies                                       |                         | <ul style="list-style-type: none"> <li>3 CRTs, 6 RCTs, and 3 NRCS</li> <li>Inconsistency, indirectness, and imprecision were deemed not serious</li> </ul>                                                                                                                                                     |
| Multifaceted vs Single component          | Clinical Practice (Dichotomous) | OR:<br>1.35<br>(0.76, 2.40)  | 14 studies<br>20 assessments<br>1 656 healthcare professionals from 10 studies<br>3 596 patients from 5 studies<br>251 clusters of healthcare professionals for 8 studies        | ⊕⊕⊕⊖<br><b>Low</b>      | <ul style="list-style-type: none"> <li>Overall risk of bias was deemed not serious (9 low risk of bias studies out of 14)</li> <li>9 CRTs, 4 RCTs, and 1 NRCS</li> <li>Inconsistency was considered serious while indirectness and imprecision were deemed not serious</li> </ul>                              |
| Multifaceted vs Single component          | Patient Outcome (Continuous)    | SMD:<br>0.43<br>(0.26, 0.61) | 2 studies<br>2 assessments<br>37 healthcare professionals from 1 study<br>507 patients from 2 studies<br>6 clusters of health professional for 1 study                           | ⊕⊕⊕⊖<br><b>Very low</b> | <ul style="list-style-type: none"> <li>Overall risk of bias was deemed very serious (0 low risk of bias studies out of 2)</li> <li>1 CRT and 1 RCT</li> <li>Imprecision was considered very serious while indirectness and inconsistency were deemed not serious</li> </ul>                                    |
| Multifaceted vs Single component          | Patient Outcome (Dichotomous)   | OR:<br>1.30<br>(0.89, 1.90)  | 3 studies<br>5 assessments<br>2 176 patients from 3 studies<br>223 healthcare professionals from 2 studies<br>179 clusters of healthcare professionals for 3 studies             | ⊕⊕⊕⊖<br><b>Low</b>      | <ul style="list-style-type: none"> <li>Overall risk of bias was deemed not serious (2 low risk of bias studies out of 3)</li> <li>3 CRTs</li> <li>Inconsistency was considered serious while indirectness and imprecision were deemed not serious</li> </ul>                                                   |
| Group clinician education (GCE) vs no GCE | Clinical Practice (Continuous)  | SMD:<br>0.96<br>(0.73, 1.19) | 68 studies<br>72 assessments<br>107 893 patients from 20 studies<br>8 368 healthcare professionals from 61 studies<br>763 clusters of healthcare professionals for 28 studies    | ⊕⊕⊕⊖<br><b>Moderate</b> | <ul style="list-style-type: none"> <li>Overall risk of bias was deemed very serious (12 low risk of bias studies out of 68)</li> <li>25 CRTs, 24 RCTs, and 19 NRCS</li> <li>Inconsistency and imprecision were deemed serious while indirectness was deemed not serious.</li> <li>Large effect size</li> </ul> |
| Group clinician education (GCE) vs no GCE | Clinical Practice (Dichotomous) | OR:<br>1.81<br>(1.50, 2.19)  | 55 studies<br>63 assessments<br>100 319 patients from 46 studies<br>11 890 healthcare professionals from 48 studies<br>1 196 clusters of healthcare professionals for 53 studies | ⊕⊕⊕⊖<br><b>Moderate</b> | <ul style="list-style-type: none"> <li>Overall risk of bias was deemed serious (25 low risk of bias studies out of 55)</li> <li>39 CRTs, 6 RCTs, and 10 NRCS</li> <li>Inconsistency and imprecision were deemed serious while indirectness was deemed not serious</li> <li>Moderate effect size</li> </ul>     |

## Additional file 10. Summary of findings tables: Effects of implementation strategies on nursing practice and patient outcomes

|                                                |                                 |                               |                                                                                                                                                                                             |                         |                                                                                                                                                                                                                                                                                                                                    |
|------------------------------------------------|---------------------------------|-------------------------------|---------------------------------------------------------------------------------------------------------------------------------------------------------------------------------------------|-------------------------|------------------------------------------------------------------------------------------------------------------------------------------------------------------------------------------------------------------------------------------------------------------------------------------------------------------------------------|
| Group clinician education (GCE) vs no GCE      | Patient Outcome (Continuous)    | SMD:<br>0.14<br>(-0.11, 0.38) | 8 studies<br>8 assessments<br>107 845 patients from 8 studies<br>607 healthcare professionals from 6 studies<br>176 clusters of healthcare professionals for 6 studies                      | ⊕⊕⊕⊖<br><b>Moderate</b> | <ul style="list-style-type: none"> <li>Overall risk of bias was deemed not serious (4 low risk of bias studies out of 8)</li> <li>6 CRTs and 2 RCTs</li> <li>Inconsistency, indirectness, and imprecision were deemed not serious</li> </ul>                                                                                       |
| Group clinician education (GCE) vs no GCE      | Patient Outcome (Dichotomous)   | OR:<br>1.37<br>(1.07, 1.77)   | 12 studies<br>13 assessments<br>20 983 patients from 9 studies<br>2 054 healthcare professionals from 7 studies<br>284 clusters of healthcare professionals for 10 studies                  | ⊕⊕⊕⊖<br><b>Low</b>      | <ul style="list-style-type: none"> <li>Overall risk of bias was deemed serious (5 low risk of bias studies out of 12)</li> <li>8 CRTs, 2 RCTs, and 2 NRCS</li> <li>Inconsistency and indirectness were deemed not serious while imprecision was deemed very serious</li> </ul>                                                     |
| Individual clinician education (ICE) vs no ICE | Clinical Practice (Continuous)  | SMD:<br>0.82<br>(0.60, 1.03)  | 62 studies<br>67 assessments<br>107 893 patients from 15 studies<br>5 492 healthcare professionals from 56 studies<br>451 clusters of healthcare professionals for 25 studies               | ⊕⊕⊕⊖<br><b>Low</b>      | <ul style="list-style-type: none"> <li>Overall risk of bias was deemed very serious (11 low risk of bias studies out of 62)</li> <li>23 CRTs, 22 RCTs, and 17 NRCS</li> <li>Inconsistency and indirectness were deemed serious while imprecision was deemed not serious</li> <li>Large effect size</li> </ul>                      |
| Individual clinician education (ICE) vs no ICE | Clinical Practice (Dichotomous) | OR:<br>2.04<br>(1.62, 2.56)   | 53 studies<br>61 assessments<br>107 567 patients from 51 studies<br>8 704 healthcare professionals from 51 studies<br>1 003 clusters of healthcare professionals or patients for 51 studies | ⊕⊕⊕⊖<br><b>Moderate</b> | <ul style="list-style-type: none"> <li>Overall risk of bias was deemed not serious (27 low risk of bias studies out of 53)</li> <li>34 CRTs, 7 RCTs, and 12 NRCS</li> <li>Inconsistency was deemed serious, indirectness was deemed very serious while imprecision was deemed not serious</li> <li>Moderate effect size</li> </ul> |
| Individual clinician education (ICE) vs no ICE | Patient Outcome (Continuous)    | SMD:<br>0.17<br>(-0.02, 0.35) | 9 studies<br>9 assessments<br>108 039 patients from 9 studies<br>950 healthcare professionals from 7 studies<br>192 clusters of healthcare professionals or patients for 7 studies          | ⊕⊕⊕⊖<br><b>Moderate</b> | <ul style="list-style-type: none"> <li>Overall risk of bias was deemed serious (3 low risk of bias studies out of 9)</li> <li>6 CRTs, 1 RCT, and 2 NRCS</li> <li>Inconsistency, indirectness, and imprecision were deemed not serious</li> </ul>                                                                                   |
| Individual clinician                           | Patient Outcome (Dichotomous)   | OR:<br>1.26<br>(0.81, 1.94)   | 11 studies                                                                                                                                                                                  | ⊕⊕⊕⊖<br><b>Moderate</b> | <ul style="list-style-type: none"> <li>Overall risk of bias was deemed serious (3 low risk of bias studies out of 11)</li> </ul>                                                                                                                                                                                                   |

## Additional file 10. Summary of findings tables: Effects of implementation strategies on nursing practice and patient outcomes

|                                                        |                                     |                               |                                                                                                                                                                              |                         |                                                                                                                                                                                                                                                                                                            |
|--------------------------------------------------------|-------------------------------------|-------------------------------|------------------------------------------------------------------------------------------------------------------------------------------------------------------------------|-------------------------|------------------------------------------------------------------------------------------------------------------------------------------------------------------------------------------------------------------------------------------------------------------------------------------------------------|
| education (ICE)<br>vs no ICE                           |                                     |                               | 11 assessments<br>22 440 patients from 10 studies<br>1 497 healthcare professionals from 7 studies<br>295 clusters of healthcare professionals or patients from 9 studies    |                         | <ul style="list-style-type: none"> <li>7 CRTs, 1 RCT, and 3 NRCS</li> <li>Inconsistency and indirectness were deemed not serious while imprecision was considered serious</li> </ul>                                                                                                                       |
| Reminders vs<br>no Reminders                           | Clinical Practice<br>(Continuous)   | SMD:<br>0.61<br>(-0.11, 1.33) | 11 studies<br>12 assessments<br>240 patients from 2 studies<br>922 healthcare professionals from 10 studies<br>7 clusters of healthcare professionals for 2 studies          | ⊕⊕⊕⊖<br><b>Low</b>      | <ul style="list-style-type: none"> <li>Overall risk of bias was deemed very serious (2 low risk of bias studies out of 11)</li> <li>4 CRTs, 2 RCTs, and 5 NRCS</li> <li>Inconsistency, indirectness, and imprecision were deemed not serious</li> </ul>                                                    |
| Reminders vs<br>no Reminders                           | Clinical Practice<br>(Dichotomous)  | OR:<br>2.44<br>(1.89, 3.17)   | 23 studies<br>25 assessments<br>30 561 patients from 12 studies<br>4 882 healthcare professionals from 19 studies<br>361 clusters of healthcare professionals for 17 studies | ⊕⊕⊕⊕<br><b>High</b>     | <ul style="list-style-type: none"> <li>Overall risk of bias was deemed not serious (15 low risk of bias studies out of 23)</li> <li>16 CRTs, 5 RCTs, and 2 NRCS</li> <li>Inconsistency was deemed serious while indirectness and imprecision were deemed not serious</li> <li>Large effect size</li> </ul> |
| Reminders vs<br>no Reminders                           | Patient<br>Outcome<br>(Dichotomous) | OR:<br>1.00<br>(0.76, 1.31)   | 8 studies<br>8 assessments<br>15 538 patients from 6 studies<br>1 491 healthcare professionals from 7 studies<br>94 clusters of healthcare professionals for 6 studies       | ⊕⊕⊕⊖<br><b>Moderate</b> | <ul style="list-style-type: none"> <li>Overall risk of bias was deemed serious (4 low risk of bias studies out of 8)</li> <li>6 CRTs and 2 NRCS</li> <li>Imprecision was deemed serious while indirectness and inconsistency were deemed not serious</li> </ul>                                            |
| Patient-mediated<br>intervention<br>(PMI)<br>Vs no PMI | Clinical Practice<br>(Dichotomous)  | OR:<br>1.78<br>(1.13, 3.17)   | 8 studies<br>9 assessments<br>25 700 patients from 5 studies<br>6 082 healthcare professionals from 6 studies<br>332 clusters of healthcare professionals for 8 studies      | ⊕⊕⊕⊖<br><b>Low</b>      | <ul style="list-style-type: none"> <li>Overall risk of bias was deemed serious (4 low risk of bias studies out of 8)</li> <li>7 CRTs and 1 NRCS</li> <li>Inconsistency was deemed serious while indirectness and imprecision were deemed not serious</li> </ul>                                            |
| Patient-mediated<br>intervention<br>(PMI)<br>Vs no PMI | Patient<br>Outcome<br>(Dichotomous) | OR:<br>0.97<br>(0.79, 1.19)   | 2 studies<br>2 assessments                                                                                                                                                   | ⊕⊕⊕⊖<br><b>Low</b>      | <ul style="list-style-type: none"> <li>Overall risk of bias was deemed very serious (0 low risk of bias studies out of 2)</li> <li>2 CRTs</li> </ul>                                                                                                                                                       |

## Additional file 10. Summary of findings tables: Effects of implementation strategies on nursing practice and patient outcomes

|                                     |                                 |                          |                                                                                                                                                                              |                         |                                                                                                                                                                                                                                                                   |
|-------------------------------------|---------------------------------|--------------------------|------------------------------------------------------------------------------------------------------------------------------------------------------------------------------|-------------------------|-------------------------------------------------------------------------------------------------------------------------------------------------------------------------------------------------------------------------------------------------------------------|
|                                     |                                 |                          | 269 patients from 2 studies<br>4 935 healthcare professionals from 1 study<br>30 clusters of healthcare professionals for 2 studies                                          |                         | <ul style="list-style-type: none"> <li>Imprecision was deemed serious while inconsistency and indirectness were deemed not serious</li> </ul>                                                                                                                     |
| Audit and feedback (A&F) vs no A&F  | Clinical Practice (Continuous)  | SMD: -0.18 (-0.60, 0.24) | 7 studies<br>7 assessments<br>7 445 patients from 2 studies<br>1 360 healthcare professionals from 6 studies<br>145 clusters of healthcare professionals for 3 studies       | ⊕⊕⊕⊖<br><b>Moderate</b> | <ul style="list-style-type: none"> <li>Overall risk of bias deemed serious (2 low risk of bias studies out of 7)</li> <li>5 CRTs and 2 NRCS</li> <li>Inconsistency, indirectness, and Imprecision were deemed not serious</li> </ul>                              |
| Audit and feedback (A&F) vs no A&F  | Clinical Practice (Dichotomous) | OR: 1.42 (0.94, 2.13)    | 17 studies<br>22 assessments<br>34 489 patients from 12 studies<br>2 225 healthcare professionals from 12 studies<br>390 clusters of healthcare professionals for 15 studies | ⊕⊕⊕⊖<br><b>Moderate</b> | <ul style="list-style-type: none"> <li>Overall risk of bias was deemed serious (8 low risk of bias studies out of 17)</li> <li>13 CRTs and 4 NRCS</li> <li>Inconsistency was deemed serious while indirectness and imprecision were deemed not serious</li> </ul> |
| Audit and feedback (A&F) vs no A&F  | Patient Outcome (Continuous)    | SMD: -0.21 (-0.66, 0.25) | 2 studies<br>3 assessments<br>309 healthcare professionals from 1 study<br>8 624 patients from 2 studies<br>125 clusters of healthcare professionals for 2 studies           | ⊕⊕⊕⊖<br><b>Very Low</b> | <ul style="list-style-type: none"> <li>Overall risk of bias was deemed very serious (0 low risk of bias studies out of 2)</li> <li>2 CRTs</li> <li>Inconsistency and indirectness were deemed not serious while imprecision was deemed serious.</li> </ul>        |
| Audit and feedback (A&F) vs no A&F  | Patient Outcome (Dichotomous)   | OR: 1.11 (0.74, 1.65)    | 8 studies<br>11 assessments<br>1 463 healthcare professionals from 6 studies<br>15 353 patients from 6 studies<br>258 clusters of healthcare professionals for 6 studies     | ⊕⊕⊕⊖<br><b>Low</b>      | <ul style="list-style-type: none"> <li>Overall risk of bias was deemed serious (3 low risk of bias studies out of 8)</li> <li>6 CRTs and 2 NRCS</li> <li>Inconsistency, indirectness, were deemed not serious while imprecision was deemed serious</li> </ul>     |
| Tailored intervention (TI) vs no TI | Clinical practice (Continuous)  | SMD: 1.41 (0.65, 2.17)   | 9 studies<br>10 assessments<br>8 510 patients from 4 studies<br>1 162 healthcare professionals from 7 studies<br>125 clusters of healthcare professionals for 2 studies      | ⊕⊕⊕⊖<br><b>Moderate</b> | <ul style="list-style-type: none"> <li>Overall risk of bias deemed very serious (0 low risk of bias studies out of 9)</li> <li>3 CRTs, 3 RCTs, and 3 NRCS</li> <li>Inconsistency deemed serious; indirectness and imprecision were deemed not serious</li> </ul>  |

## Additional file 10. Summary of findings tables: Effects of implementation strategies on nursing practice and patient outcomes

|                                     |                                          |                         |                                                                                                                                                                                                    |                         |                                                                                                                                                                                                                                                                                        |
|-------------------------------------|------------------------------------------|-------------------------|----------------------------------------------------------------------------------------------------------------------------------------------------------------------------------------------------|-------------------------|----------------------------------------------------------------------------------------------------------------------------------------------------------------------------------------------------------------------------------------------------------------------------------------|
|                                     |                                          |                         |                                                                                                                                                                                                    |                         | <ul style="list-style-type: none"> <li>Large effect size</li> </ul>                                                                                                                                                                                                                    |
| Tailored intervention (TI) vs no TI | Clinical Practice (Dichotomous)          | OR: 1.90 (1.23, 2.93)   | <p>14 studies</p> <p>15 assessments</p> <p>37 794 patients from 8 studies</p> <p>3 656 healthcare professionals from 9 studies</p> <p>497 clusters of healthcare professionals for 14 studies</p>  | ⊕⊕⊕⊕<br><b>High</b>     | <ul style="list-style-type: none"> <li>Overall risk of bias deemed not serious (10 low risk of bias studies out of 14)</li> <li>13 CRTs and 1 NRCS</li> <li>Inconsistency was deemed serious; indirectness and Imprecision deemed not serious</li> <li>Moderate effect size</li> </ul> |
| Tailored intervention (TI) vs no TI | Patient Outcomes (Continuous)            | SMD: 0.23 (0.09, 0.37)  | <p>3 studies</p> <p>4 assessments</p> <p>9 926 patients from 3 studies</p> <p>34 healthcare professionals from 1 study</p> <p>147 clusters of healthcare professionals for 2 studies</p>           | ⊕⊕⊕⊖<br><b>Moderate</b> | <ul style="list-style-type: none"> <li>Overall risk of bias was deemed serious (1 low risk of bias studies out of 3)</li> <li>2 CRTs and 1 RCT</li> <li>Indirectness and Imprecision deemed not serious</li> </ul>                                                                     |
| Tailored intervention (TI) vs no TI | Patient Outcomes (Dichotomous)           | OR: 1.34 (0.96, 1.86)   | <p>6 studies</p> <p>6 assessments</p> <p>9 044 patients from 4 studies</p> <p>434 healthcare professionals from 3 studies</p> <p>133 clusters of healthcare professionals for 5 studies</p>        | ⊕⊕⊕⊖<br><b>Moderate</b> | <ul style="list-style-type: none"> <li>Overall risk of bias was deemed serious (3 low risk of bias studies out of 6)</li> <li>5 CRTs and 1 NRCS</li> <li>Inconsistency was deemed serious; indirectness and imprecision deemed not serious</li> </ul>                                  |
| Opinion leaders (OLs) vs no OLs     | Clinical Practice outcomes (Continuous)  | SMD: 0.41 (-0.10, 0.93) | <p>4 studies</p> <p>4 assessments</p> <p>80 patients from 2 studies</p> <p>466 healthcare professionals from 3 studies</p> <p>331 clusters of healthcare professionals for 2 studies</p>           | ⊕⊕⊖⊖<br><b>Low</b>      | <ul style="list-style-type: none"> <li>Overall risk of bias was deemed very serious (0 low risk of bias studies out of 4 studies)</li> <li>1 CRT and 3 NRCS</li> <li>Inconsistency was assessed as being serious; indirectness and Imprecision deemed not serious</li> </ul>           |
| Opinion leaders (OLs) vs no OLs     | Clinical Practice outcomes (Dichotomous) | OR: 1.96 (1.22, 3.14)   | <p>13 studies</p> <p>15 assessments</p> <p>24 675 patients from 6 studies</p> <p>7 821 healthcare professionals from 10 studies</p> <p>456 clusters of healthcare professionals for 11 studies</p> | ⊕⊕⊖⊖<br><b>Low</b>      | <ul style="list-style-type: none"> <li>Overall risk of bias was deemed low (10 of 13 studies had low risk of bias)</li> <li>12 CRTs and 1 NRCS</li> <li>Inconsistency was assessed as being serious; indirectness and imprecision were not deemed serious</li> </ul>                   |
| Opinion leaders (OLs) vs no OLs     | Patient                                  | OR: 0.92                | <p>4 studies</p>                                                                                                                                                                                   | ⊕⊕⊖⊖<br><b>Moderate</b> | <ul style="list-style-type: none"> <li>Overall risk of bias was deemed low (3 of 4 studies had low risk of bias)</li> </ul>                                                                                                                                                            |

## Additional file 10. Summary of findings tables: Effects of implementation strategies on nursing practice and patient outcomes

|                                                                                                                                                                                                                                                                                                                                                                                                                                                                                                                                                                                                                                                                                                                                          |                           |              |                                                                                                                                                                   |  |                                                                                                                                                                                          |
|------------------------------------------------------------------------------------------------------------------------------------------------------------------------------------------------------------------------------------------------------------------------------------------------------------------------------------------------------------------------------------------------------------------------------------------------------------------------------------------------------------------------------------------------------------------------------------------------------------------------------------------------------------------------------------------------------------------------------------------|---------------------------|--------------|-------------------------------------------------------------------------------------------------------------------------------------------------------------------|--|------------------------------------------------------------------------------------------------------------------------------------------------------------------------------------------|
|                                                                                                                                                                                                                                                                                                                                                                                                                                                                                                                                                                                                                                                                                                                                          | Outcomes<br>(Dichotomous) | (0.86, 1.00) | 5 assessments<br><br>1 192 patients from 2 studies<br><br>902 healthcare professionals from 1 study<br><br>184 clusters of healthcare professionals for 4 studies |  | <ul style="list-style-type: none"> <li>• 4 CRTs</li> <li>• Only serious concern was regarding imprecision, all other (inconsistency and indirectness) were not deemed serious</li> </ul> |
| <p>GRADE Working Group grades of evidence:</p> <p><b>High quality:</b> We are very confident that the true effect lies close to that of the estimate of the effect.</p> <p><b>Moderate quality:</b> We are moderately confident in the effect estimate: The true effect is likely to be close to the estimate of the effect, but there is a possibility that it is substantially different.</p> <p><b>Low quality:</b> Our confidence in the effect estimate is limited: The true effect may be substantially different from the estimate of the effect.</p> <p><b>Very low quality:</b> We have very little confidence in the effect estimate: The true effect is likely to be substantially different from the estimate of effect.</p> |                           |              |                                                                                                                                                                   |  |                                                                                                                                                                                          |

## Additional file 10. Summary of findings tables: Effects of implementation strategies on nursing practice and patient outcomes

Table S10-2. Summary of findings: Effects of implementation strategies on the determinants of nurses' clinical practice (secondary outcomes).

| Population: Healthcare professionals (≥90% nurses) |                                |                         |                                                                                                                                                                          |                                 |                                                                                                                                                                                                                                                                                     |
|----------------------------------------------------|--------------------------------|-------------------------|--------------------------------------------------------------------------------------------------------------------------------------------------------------------------|---------------------------------|-------------------------------------------------------------------------------------------------------------------------------------------------------------------------------------------------------------------------------------------------------------------------------------|
| Comparison                                         | Outcome                        | Effect size (95% CI)    | Number of healthcare professionals (studies)                                                                                                                             | Quality of the evidence (GRADE) | Comments                                                                                                                                                                                                                                                                            |
| Any implementation strategy vs None                | Attitude (Continuous)          | SMD: 0.59 (0.23, 0.95)  | 25 studies<br>30 assessments<br>903 patients from 6 studies<br>2 819 healthcare professionals from 24 studies<br>88 clusters of healthcare professionals for 9 studies   | ⊕⊕⊕⊕<br><b>Very Low</b>         | <ul style="list-style-type: none"> <li>Overall risk of bias was deemed very serious (4 low risk of bias studies out of 25)</li> <li>8 CRTs, 10 RCTs, and 7 NRCS</li> <li>Imprecision and indirectness were considered not serious while inconsistency was deemed serious</li> </ul> |
| Any implementation strategy vs None                | Knowledge (Continuous)         | SMD: 1.16 (0.82, 1.49)  | 31 studies<br>37 assessments<br>329 patients from 4 studies<br>3 812 healthcare professionals from 30 studies<br>65 clusters of healthcare professionals for 8 studies   | ⊕⊕⊕⊕<br><b>Low</b>              | <ul style="list-style-type: none"> <li>Overall risk of bias was deemed serious (7 low risk of bias studies out of 31)</li> <li>11 CRTs, 11 RCTs, and 9 NRCS</li> <li>Imprecision and indirectness were considered not serious while inconsistency was deemed serious</li> </ul>     |
| Any implementation strategy vs None                | Skills (Continuous)            | SMD: 0.97 (0.42, 1.52)  | 7 studies<br>10 assessments<br>160 patients from 1 study<br>810 healthcare professionals from 7 studies<br>82 clusters of healthcare professionals for 3 studies         | ⊕⊕⊕⊕<br><b>Low</b>              | <ul style="list-style-type: none"> <li>Overall risk of bias was deemed very serious (1 low risk of bias studies out of 7)</li> <li>4 CRTs and 3 RCTs</li> <li>Inconsistency, and indirectness were considered not serious while imprecision was deemed serious</li> </ul>           |
| Any implementation strategy vs None                | Perceived control (Continuous) | SMD: 0.74 (0.35, 1.13)  | 18 studies<br>19 assessments<br>1 125 patients from 6 studies<br>1 978 healthcare professionals from 18 studies<br>39 clusters of healthcare professionals for 5 studies | ⊕⊕⊕⊕<br><b>Low</b>              | <ul style="list-style-type: none"> <li>Overall risk of bias was deemed very serious (1 low risk of bias studies out of 18)</li> <li>4 CRTs, 9 RCTs, and 5 NRCS</li> <li>Inconsistency, imprecision, and indirectness were considered not serious</li> </ul>                         |
| Any implementation strategy vs None                | Social norms (Continuous)      | SMD: 0.32 (-0.07, 0.72) | 2 studies<br>2 assessments<br>124 healthcare professionals from 2 studies                                                                                                | ⊕⊕⊕⊕<br><b>Very Low</b>         | <ul style="list-style-type: none"> <li>Overall risk of bias was deemed very serious (0 low risk of bias studies out of 2)</li> <li>2 NRCS</li> <li>Inconsistency, and indirectness were considered not serious while imprecision was deemed serious</li> </ul>                      |



## Additional file 10. Summary of findings tables: Effects of implementation strategies on nursing practice and patient outcomes

|                                     |                                |                         |                                                                                                                                                                                                            |                         |                                                                                                                                                                                                                                                                               |
|-------------------------------------|--------------------------------|-------------------------|------------------------------------------------------------------------------------------------------------------------------------------------------------------------------------------------------------|-------------------------|-------------------------------------------------------------------------------------------------------------------------------------------------------------------------------------------------------------------------------------------------------------------------------|
|                                     |                                |                         | 140 patients from 1 study<br>25 clusters of healthcare professionals for 2 studies                                                                                                                         |                         |                                                                                                                                                                                                                                                                               |
| Any implementation strategy vs None | Intention (Continuous)         | SMD: 0.53 (-0.19, 1.25) | 3 studies<br>3 assessments<br>516 patients from 1 study<br>189 healthcare professionals from 3 studies<br>6 clusters of healthcare professionals for 2 studies                                             | ⊕⊕⊕⊕<br><b>Very Low</b> | <ul style="list-style-type: none"> <li>Overall risk of bias was deemed very serious (0 low risk of bias studies out of 3)</li> <li>1 CRT, 1 RCT, and 1 NRCS</li> <li>Imprecision, inconsistency, and indirectness were considered not serious</li> </ul>                      |
| Multifaceted vs Single component    | Attitude (Continuous)          | SMD: 0.16 (-0.13, 0.45) | 3 assessments<br>3 studies<br>753 patients reported from 1 study<br>569 healthcare professionals reported from 3 studies<br>179 clusters of healthcare professionals and/or patients from 1 study          | ⊕⊕⊕⊕<br><b>Very Low</b> | <ul style="list-style-type: none"> <li>Overall risk of bias was deemed very serious (0 low risk of bias studies out of 3)</li> <li>2 RCTs and 1 NRCS</li> <li>Inconsistency, and indirectness were considered not serious while imprecision was deemed serious</li> </ul>     |
| Multifaceted vs Single component    | Knowledge (Continuous)         | SMD: 0.73 (0.28, 1.18)  | 11 assessments<br>11 studies<br>786 patients reported from 2 studies<br>1 413 healthcare professionals reported from 11 studies<br>197 clusters of healthcare professionals and/or patients from 3 studies | ⊕⊕⊕⊕<br><b>Low</b>      | <ul style="list-style-type: none"> <li>Overall risk of bias was deemed very serious (2 low risk of bias studies out of 11)</li> <li>2 CRTs, 6 RCTs, and 3 NRCS</li> <li>Imprecision, inconsistency and indirectness were considered not serious</li> </ul>                    |
| Multifaceted vs Single component    | Perceived control (Continuous) | SMD: 0.13 (-0.21, 0.47) | 3 assessments<br>3 studies<br>753 patients reported from 1 study<br>559 healthcare professionals reported from 3 studies<br>179 clusters of healthcare professionals and/or patients from 1 study          | ⊕⊕⊕⊕<br><b>Very Low</b> | <ul style="list-style-type: none"> <li>Overall risk of bias was deemed very serious (0 low risk of bias studies out of 3)</li> <li>2 RCTs and 1 NRCS</li> <li>Imprecision was considered serious, while inconsistency and indirectness were considered not serious</li> </ul> |

## Additional file 10. Summary of findings tables: Effects of implementation strategies on nursing practice and patient outcomes

|                                                |                                |                               |                                                                                                                                                                                                           |                         |                                                                                                                                                                                                                                                                                                              |
|------------------------------------------------|--------------------------------|-------------------------------|-----------------------------------------------------------------------------------------------------------------------------------------------------------------------------------------------------------|-------------------------|--------------------------------------------------------------------------------------------------------------------------------------------------------------------------------------------------------------------------------------------------------------------------------------------------------------|
| Individual clinician education (ICE) vs no ICE | Intention (Continuous)         | SMD:<br>0.16<br>(-0.31, 0.63) | 2 studies<br>2 assessments<br>516 patients reported from 1 study<br>129 healthcare professionals reported from 2 studies<br>4 clusters of healthcare professionals and/or patients from 1 study           | ⊕⊕⊕⊕<br><b>Very Low</b> | <ul style="list-style-type: none"> <li>Overall risk of bias was deemed very serious (0 low risk of bias studies out of 2)</li> <li>1 CRT and 1 RCT</li> <li>Inconsistency and imprecision were considered very serious while indirectness was considered not serious</li> </ul>                              |
| Individual clinician education (ICE) vs no ICE | Attitude (Continuous)          | SMD:<br>0.68<br>(0.31, 1.05)  | 25 studies<br>30 assessments<br>429 patients reported from 4 studies<br>2 672 healthcare professionals reported from 24 studies<br>86 clusters of healthcare professionals and/or patients from 8 studies | ⊕⊕⊕⊕<br><b>Very Low</b> | <ul style="list-style-type: none"> <li>Overall risk of bias was deemed very serious (3 low risk of bias studies out of 25)</li> <li>8 CRTs, 10 RCTs, and 7 NRCS</li> <li>Inconsistency was considered serious, imprecision was deemed very serious while indirectness was considered not serious</li> </ul>  |
| Individual clinician education (ICE) vs no ICE | Attitude (Dichotomous)         | OR:<br>1.65<br>(0.71, 3.83)   | 2 studies<br>2 assessments<br>516 patients reported from 1 study<br>272 healthcare professionals reported from 2 studies<br>4 clusters of healthcare professionals and/or patients from 1 study           | ⊕⊕⊕⊕<br><b>Very Low</b> | <ul style="list-style-type: none"> <li>Overall risk of bias was deemed serious (1 low risk of bias studies out of 2)</li> <li>1 CRT and 1 RCT</li> <li>Inconsistency was considered serious; imprecision was deemed very serious while indirectness was considered not serious</li> </ul>                    |
| Individual clinician education (ICE) vs no ICE | Knowledge (Continuous)         | SMD:<br>1.03<br>(0.73, 1.33)  | 36 studies<br>42 assessments<br>329 patients reported from 4 studies<br>3 725 healthcare professionals reported from 35 studies<br>71 clusters of healthcare professionals and/or patients from 9 studies | ⊕⊕⊕⊕<br><b>Moderate</b> | <ul style="list-style-type: none"> <li>Overall risk of bias was deemed serious (10 low risk of bias studies out of 36)</li> <li>11 CRTs, 15 RCTs, and 10 NRCS</li> <li>Inconsistency was considered serious while indirectness and imprecision were deemed not serious</li> <li>Large effect size</li> </ul> |
| Individual clinician education (ICE) vs no ICE | Perceived control (Continuous) | SMD:<br>0.89<br>(0.39, 1.38)  | 13 studies<br>14 assessments<br>694 patients reported from 4 studies                                                                                                                                      | ⊕⊕⊕⊕<br><b>Moderate</b> | <ul style="list-style-type: none"> <li>Overall risk of bias was deemed serious (1 low risk of bias studies out of 13)</li> <li>2 CRTs, 7 RCTs, and 4 NRCS</li> <li>Inconsistency was deemed serious while indirectness and imprecision were deemed not serious</li> </ul>                                    |

## Additional file 10. Summary of findings tables: Effects of implementation strategies on nursing practice and patient outcomes

|                                                |                        |                         |                                                                                                                                                                                                             |                         |                                                                                                                                                                                                                                                                                    |
|------------------------------------------------|------------------------|-------------------------|-------------------------------------------------------------------------------------------------------------------------------------------------------------------------------------------------------------|-------------------------|------------------------------------------------------------------------------------------------------------------------------------------------------------------------------------------------------------------------------------------------------------------------------------|
|                                                |                        |                         | 1 315 healthcare professionals reported from 13 studies<br>35 clusters of healthcare professionals and/or patients from 3 studies                                                                           |                         | <ul style="list-style-type: none"> <li>Large effect size</li> </ul>                                                                                                                                                                                                                |
| Individual clinician education (ICE) vs no ICE | Skills (Continuous)    | SMD: 0.49 (0.22, 0.77)  | 5 studies<br>8 assessments<br>160 patients reported from 1 study<br>587 healthcare professionals reported from 5 studies<br>78 clusters of healthcare professionals and/or patients from 2 studies          | ⊕⊕⊕⊖<br><b>Low</b>      | <ul style="list-style-type: none"> <li>Overall risk of bias was deemed very serious (1 low risk of bias studies out of 5)</li> <li>3 CRTs and 2 RCTs</li> <li>Inconsistency, indirectness, and imprecision were deemed not serious</li> </ul>                                      |
| Group clinician education (GCE) vs no GCE      | Intention (Continuous) | SMD: 0.43 (-0.12, 0.99) | 4 studies<br>4 assessments<br>1 269 patients reported from 2 studies<br>458 healthcare professionals reported from 4 studies<br>6 clusters of healthcare professionals and/or patients from 2 studies       | ⊕⊕⊕⊖<br><b>Very Low</b> | <ul style="list-style-type: none"> <li>Overall risk of bias was deemed very serious (0 low risk of bias studies out of 4)</li> <li>1 CRT, 2 RCTs, and 1 NRCS</li> <li>Inconsistency, indirectness, and imprecision were deemed not serious while were deemed serious</li> </ul>    |
| Group clinician education (GCE) vs no GCE      | Attitude (Continuous)  | SMD: 0.54 (0.19, 0.89)  | 27 studies<br>32 assessments<br>1 656 patients reported from 7 studies<br>3 196 healthcare professionals reported from 26 studies<br>88 clusters of healthcare professionals and/or patients from 9 studies | ⊕⊕⊕⊖<br><b>Very Low</b> | <ul style="list-style-type: none"> <li>Overall risk of bias was deemed very serious (3 low risk of bias studies out of 27)</li> <li>8 CRTs, 11 RCTs, and 8 NRCS</li> <li>Inconsistency, indirectness, and imprecision were deemed not serious while were deemed serious</li> </ul> |
| Group clinician education (GCE) vs no GCE      | Attitude (Dichotomous) | OR: 2.59 (0.48, 13.87)  | 2 studies<br>2 assessments<br>516 patients reported from 1 study<br>53 healthcare professionals reported from 1 study<br>14 clusters of healthcare professionals and/or patients from 2 studies             | ⊕⊕⊕⊖<br><b>Low</b>      | <ul style="list-style-type: none"> <li>Overall risk of bias was deemed serious (1 low risk of bias studies out of 2)</li> <li>2 CRTs</li> <li>Indirectness was deemed not serious while inconsistency and imprecision were deemed serious</li> <li>Large effect size</li> </ul>    |
| Group clinician education (GCE) vs no GCE      | Knowledge (Continuous) | SMD: 1.07 (0.73, 1.40)  | 32 studies<br>42 assessments                                                                                                                                                                                | ⊕⊕⊕⊖<br><b>Moderate</b> | <ul style="list-style-type: none"> <li>Overall risk of bias was deemed serious (9 low risk of bias studies out of 32)</li> <li>13 CRTs, 11 RCTs, and 8 NRCS</li> </ul>                                                                                                             |

## Additional file 10. Summary of findings tables: Effects of implementation strategies on nursing practice and patient outcomes

|                                           |                                |                         |                                                                                                                                                                                                                                    |                         |                                                                                                                                                                                                                                                                             |
|-------------------------------------------|--------------------------------|-------------------------|------------------------------------------------------------------------------------------------------------------------------------------------------------------------------------------------------------------------------------|-------------------------|-----------------------------------------------------------------------------------------------------------------------------------------------------------------------------------------------------------------------------------------------------------------------------|
|                                           |                                |                         | <p>5 702 patients reported from 7 studies</p> <p>7 287 healthcare professionals reported form 31 studies</p> <p>94 clusters of healthcare professionals and/or patients from 10 studies</p>                                        |                         | <ul style="list-style-type: none"> <li>Inconsistency and indirectness were deemed not serious while imprecision was deemed serious</li> <li>Large effect size</li> </ul>                                                                                                    |
| Group clinician education (GCE) vs no GCE | Skills (Continuous)            | SMD: 0.64 (0.33, 0.95)  | <p>6 studies</p> <p>9 assessments</p> <p>160 patients reported from 1 study</p> <p>730 healthcare professionals reported form 6 studies</p> <p>78 clusters of healthcare professionals and/or patients from 2 studies</p>          | ⊕⊕⊕⊕<br><b>Very Low</b> | <ul style="list-style-type: none"> <li>Overall risk of bias was deemed very serious (1 low risk of bias studies out of 6)</li> <li>3 CRTs and 3 RCTs</li> <li>Inconsistency, indirectness, and imprecision were deemed not serious</li> </ul>                               |
| Group clinician education (GCE) vs no GCE | Perceived control (Continuous) | SMD: 0.75 (0.33, 1.17)  | <p>16 studies</p> <p>18 assessments</p> <p>1 738 patients reported from 6 studies</p> <p>2 079 healthcare professionals reported form 16 studies</p> <p>16 clusters of healthcare professionals and/or patients from 4 studies</p> | ⊕⊕⊕⊕<br><b>Very Low</b> | <ul style="list-style-type: none"> <li>Overall risk of bias was deemed very serious (1 low risk of bias studies out of 16)</li> <li>4 CRTs, 9 RCTs, and 3 NRCS</li> <li>Inconsistency, indirectness, and imprecision were deemed not serious</li> </ul>                     |
| Group clinician education (GCE) vs no GCE | Social norms (Continuous)      | SMD: 0.23 (0.01, 0.45)  | <p>3 studies</p> <p>3 assessments</p> <p>893 patients reported from 2 studies</p> <p>393 healthcare professionals reported form 3 studies</p> <p>25 clusters of healthcare professionals and/or patients from 2 studies</p>        | ⊕⊕⊕⊕<br><b>Very Low</b> | <ul style="list-style-type: none"> <li>Overall risk of bias was deemed very serious (0 low risk of bias studies out of 3)</li> <li>1 RCT and 2 NRCS</li> <li>Inconsistency and indirectness were deemed not serious while imprecision was deemed serious</li> </ul>         |
| Reminders vs no Reminders                 | Attitude (Continuous)          | SMD: 1.10 (-0.41, 2.60) | <p>5 studies</p> <p>5 assessments</p> <p>40 patients reported from 1 study</p> <p>580 healthcare professionals reported form 5 studies</p> <p>10 clusters of healthcare professionals and/or patients from 3 studies</p>           | ⊕⊕⊕⊕<br><b>Moderate</b> | <ul style="list-style-type: none"> <li>Overall risk of bias was deemed not serious (3 low risk of bias studies out of 5)</li> <li>3 CRTs, 1 RCT, and 1 NRCS</li> <li>Inconsistency and indirectness were deemed not serious while imprecision was deemed serious</li> </ul> |
| Reminders vs no Reminders                 | Knowledge (Continuous)         | SMD: 1.07               | <p>10 studies</p>                                                                                                                                                                                                                  | ⊕⊕⊕⊕<br><b>Moderate</b> | <ul style="list-style-type: none"> <li>Overall risk of bias was deemed serious (4 low risk of bias studies out of 10)</li> </ul>                                                                                                                                            |

## Additional file 10. Summary of findings tables: Effects of implementation strategies on nursing practice and patient outcomes

|                                     |                                |                             |                                                                                                                                                                            |                         |                                                                                                                                                                                                                                                                                                                        |
|-------------------------------------|--------------------------------|-----------------------------|----------------------------------------------------------------------------------------------------------------------------------------------------------------------------|-------------------------|------------------------------------------------------------------------------------------------------------------------------------------------------------------------------------------------------------------------------------------------------------------------------------------------------------------------|
|                                     |                                | (0.41, 1.74)                | 10 assessments<br>100 patients reported from 2 studies<br>1 473 healthcare professionals reported from 10 studies<br>12 clusters of healthcare professionals for 4 studies |                         | <ul style="list-style-type: none"> <li>4 CRTs, 2 RCTs, and 4 NRCS</li> <li>Inconsistency was deemed serious while indirectness, and Imprecision were deemed not serious</li> <li>Large effect size</li> </ul>                                                                                                          |
| Reminders vs no Reminders           | Perceived control (Continuous) | SMD: 7.48<br>(6.74, 8.21)   | 3 studies<br>3 assessments<br>No patients reported<br>246 healthcare professionals from 3 studies<br>2 clusters of healthcare professionals for 1 study                    | ⊕⊕⊖⊖<br><b>Low</b>      | <ul style="list-style-type: none"> <li>Overall risk of bias was deemed very serious (0 low risk of bias studies out of 3)</li> <li>1 CRT and 2 RCTs</li> <li>Inconsistency was deemed very serious, imprecision was considered serious while indirectness was deemed not serious</li> <li>Large effect size</li> </ul> |
| Audit and feedback (A&F) vs no A&F  | Attitude (Continuous)          | SMD: 0.20<br>(0.01, 0.38)   | 3 studies<br>3 assessments<br>No patients reported<br>819 healthcare professionals from 3 studies<br>32 clusters of healthcare professionals for 2 studies                 | ⊕⊕⊖⊖<br><b>Low</b>      | <ul style="list-style-type: none"> <li>Overall risk of bias was deemed very serious (0 low risk of bias studies out of 3)</li> <li>3 CRTs</li> <li>Inconsistency, indirectness, and imprecision were deemed not serious</li> </ul>                                                                                     |
| Audit and feedback (A&F) vs no A&F  | Knowledge (Continuous)         | SMD: -0.17<br>(-0.97, 0.64) | 4 studies<br>4 assessments<br>60 patients from 1 study<br>1 176 healthcare professionals from 4 studies<br>14 clusters of healthcare professionals for 2 studies           | ⊕⊕⊖⊖<br><b>Low</b>      | <ul style="list-style-type: none"> <li>Overall risk of bias was deemed serious (1 low risk of bias studies out of 4)</li> <li>3 CRTs and 1 NRCS</li> <li>Inconsistency and indirectness were deemed not serious while imprecision was deemed serious</li> </ul>                                                        |
| Tailored intervention (TI) vs no TI | Attitude (Continuous)          | SMD: 0.28<br>(-0.01, 0.57)  | 4 studies<br>4 assessments<br>793 patients from 2 studies<br>825 healthcare professionals from 4 studies<br>12 clusters of healthcare professionals for 1 study            | ⊕⊖⊖⊖<br><b>Very Low</b> | <ul style="list-style-type: none"> <li>Overall risk of bias was deemed very serious (0 low risk of bias study)</li> <li>1 CRT, 1 RCT, and 2 NRCS</li> <li>Inconsistency, imprecision, and indirectness were deemed not serious</li> </ul>                                                                              |
| Tailored intervention (TI) vs no TI | Knowledge (Continuous)         | SMD: 0.53<br>(-0.04, 1.09)  | 5 studies<br>5 assessments<br>853 patients from 3 studies                                                                                                                  | ⊕⊖⊖⊖<br><b>Very Low</b> | <ul style="list-style-type: none"> <li>Overall risk of bias was deemed very serious (0 low risk of bias study)</li> <li>1 CRT, 1 RCT, and 3 NRCS</li> <li>Inconsistency was deemed serious.</li> </ul>                                                                                                                 |

## Additional file 10. Summary of findings tables: Effects of implementation strategies on nursing practice and patient outcomes

|                                                                                                                                                                                                                                                                                                                                                                                                                                                                                                                                                                                                                                                                                                                                          |                        |                               |                                                                                                                                                                  |                         |                                                                                                                                                                                                                                                                      |
|------------------------------------------------------------------------------------------------------------------------------------------------------------------------------------------------------------------------------------------------------------------------------------------------------------------------------------------------------------------------------------------------------------------------------------------------------------------------------------------------------------------------------------------------------------------------------------------------------------------------------------------------------------------------------------------------------------------------------------------|------------------------|-------------------------------|------------------------------------------------------------------------------------------------------------------------------------------------------------------|-------------------------|----------------------------------------------------------------------------------------------------------------------------------------------------------------------------------------------------------------------------------------------------------------------|
|                                                                                                                                                                                                                                                                                                                                                                                                                                                                                                                                                                                                                                                                                                                                          |                        |                               | 885 healthcare professionals from 5 studies<br>12 clusters of healthcare professionals for 1 study                                                               |                         | <ul style="list-style-type: none"> <li>Imprecision, and indirectness) were deemed not serious</li> </ul>                                                                                                                                                             |
| Opinion leaders (OLs) vs no OLs                                                                                                                                                                                                                                                                                                                                                                                                                                                                                                                                                                                                                                                                                                          | Knowledge (Continuous) | SMD:<br>0.03<br>(-0.20, 0.27) | 3 studies<br>3 assessments<br>33 patients from 1 study<br>1 018 healthcare professionals from 3 studies<br>20 clusters of healthcare professionals for 3 studies | ⊕⊕⊕⊖<br><b>Moderate</b> | <ul style="list-style-type: none"> <li>Overall risk of bias was deemed low (2 of 3 studies had low risk of bias)</li> <li>3 CRTs</li> <li>Only serious concern was regarding imprecision.</li> <li>Inconsistency and indirectness were deemed not serious</li> </ul> |
| <p>GRADE Working Group grades of evidence:</p> <p><b>High quality:</b> We are very confident that the true effect lies close to that of the estimate of the effect.</p> <p><b>Moderate quality:</b> We are moderately confident in the effect estimate: The true effect is likely to be close to the estimate of the effect, but there is a possibility that it is substantially different.</p> <p><b>Low quality:</b> Our confidence in the effect estimate is limited: The true effect may be substantially different from the estimate of the effect.</p> <p><b>Very low quality:</b> We have very little confidence in the effect estimate: The true effect is likely to be substantially different from the estimate of effect.</p> |                        |                               |                                                                                                                                                                  |                         |                                                                                                                                                                                                                                                                      |
